# Supplementary material for: Variations in physicochemical characteristics, antioxidant activity, phenolic and volatile profiles, and sensory attributes of tea-flavored Chardonnay wine during bottle aging
Source: Royal Society of Chemistry journal article supplement (doi:10.1039/d3fo03137c), 2023-01-01
Supplement: d3fo03137c1.pdf [file d3fo03137c1.pdf]

**Supplementary Data**

**Variations in physicochemical characteristics, antioxidant activity, phenolic and volatile profiles, and sensory attributes of tea-flavored Chardonnay wine during bottle aging**

Zijian Liang <sup>a</sup>, Pangzhen Zhang <sup>a</sup>, Xin-An Zeng <sup>b</sup>, Zhongxiang Fang <sup>a, \*</sup>

<sup>a</sup> School of Agriculture, Food, and Ecosystem Sciences, Faculty of Science, University of Melbourne, Parkville, VIC 3010, Australia

<sup>b</sup> School of Food Science and Engineering, South China University of Technology, Guangzhou, China

**\*Corresponding Author:**

Dr Zhongxiang Fang

School of Agriculture, Food, and Ecosystem Sciences, Faculty of Science, University of Melbourne, Parkville, Victoria, 3010, Australia

Email: [zhongxiang.fang@unimelb.edu.au](mailto:zhongxiang.fang@unimelb.edu.au); Tel: +61 3 83445063

**Table S1** HPLC-DAD-ESI-QTOF-MS/MS identification of phenolic compounds from tea-macerated Chardonnay wines, tea-macerated model wines and tea ethanolic extracts

| Class/subclass                         | Compound name      | Peak No. | Compound No. | Molecular formula                               | Retention time (min) | UV $\lambda_{\max}$ (nm) | Theoretical mass (m/z) | Experimental mass (m/z) | Error (ppm) | Major fragment ion MS/MS (m/z, abundance %) | Wine type <sup>a</sup>                                                                                                     | ID <sup>b</sup> | Literature <sup>c</sup> |
|----------------------------------------|--------------------|----------|--------------|-------------------------------------------------|----------------------|--------------------------|------------------------|-------------------------|-------------|---------------------------------------------|----------------------------------------------------------------------------------------------------------------------------|-----------------|-------------------------|
| <i>Negative mode [M-H]<sup>-</sup></i> |                    |          |              |                                                 |                      |                          |                        |                         |             |                                             |                                                                                                                            |                 |                         |
| Phenolic acids                         |                    |          |              |                                                 |                      |                          |                        |                         |             |                                             |                                                                                                                            |                 |                         |
| Hydroxybenzoic acid                    | Quinic acid 1      | 1        | 1            | C <sub>7</sub> H <sub>12</sub> O <sub>6</sub>   | 6.171                | 208, 234, 282            | 191.0561               | 191.0560                | -0.52       | 85 (100), 87 (23), 127 (22)                 | BE, C-1, GC-1, BC-1, GM-1, BM-1, C-3, GC-3, BC-3, GM-3, BM-3, C-6, GC-6, BC-6, GM-6, BM-6                                  | D, L            | (2)                     |
|                                        | Quinic acid 2      | 16       | 35           | C <sub>7</sub> H <sub>12</sub> O <sub>6</sub>   | 13.807               | 194, 282                 | 191.0561               | 191.0550                | -5.76       | 191 (100), 93 (14)                          | BC-9                                                                                                                       | D, L            | (2)                     |
|                                        | Gallic acid        | 17       | 37           | C <sub>7</sub> H <sub>6</sub> O <sub>5</sub>    | 14.146               | 218, 274                 | 169.0143               | 169.0156                | 7.69        | 125 (100)                                   | GE, BE, C-1, GC-1, BC-1, GM-1, BM-1, C-3, GC-3, BC-3, GM-3, BM-3, C-6, GC-6, BC-6, GM-6, BM-6, C-9, GC-9, BC-9, GM-9, BM-9 | S, D, L         | (6), (10), (14), (17)   |
|                                        | Galloylquinic acid | 18       | 39           | C <sub>14</sub> H <sub>16</sub> O <sub>10</sub> | 14.341               | 216, 276                 | 343.0671               | 343.0684                | 3.79        | 191 (100), 192 (56), 193 (11)               | GE, BE, GC-1, GM-1, GC-3, BC-3, GM-3, BM-3, GC-6, BC-6, GM-6, BM-6, GC-9, BC-9,                                            | D, L            | (6), (17)               |

|                      |                                                                |    |     |                                                                  |        |                      |          |          |        |                               |                                                                                                                    |         |                       |
|----------------------|----------------------------------------------------------------|----|-----|------------------------------------------------------------------|--------|----------------------|----------|----------|--------|-------------------------------|--------------------------------------------------------------------------------------------------------------------|---------|-----------------------|
|                      | 3,4-Dihydroxybenzoic acid                                      | 30 | 66  | C <sub>7</sub> H <sub>6</sub> O <sub>4</sub>                     | 20.024 | 210, 268, 293        | 153.0193 | 153.0205 | 7.91   | 108 (100), 110 (69), 87 (15)  | GM-9, BM-9, GE, BE, C-1, BC-1, C-3, BC-3, C-6, BC-6, C-9, GC-9, BC-9                                               | S, D, L | (14)                  |
|                      | 2,6-Bis- <i>O</i> -(3,4,5-trihydroxybenzoyl)-D-glucopyranose 1 | 34 | 76  | C <sub>20</sub> H <sub>20</sub> O <sub>14</sub>                  | 21.375 | 196, 226, 281, 328sh | 483.0780 | 483.0818 | 7.87   | 97 (100), 387 (66), 438 (58)  | GC-1, BC-1, GC-3, BM-3, GC-6, GC-9, GM-9, BM-9                                                                     | D       |                       |
|                      | 2,6-Bis- <i>O</i> -(3,4,5-trihydroxybenzoyl)-D-glucopyranose 2 | 35 | 81  | C <sub>20</sub> H <sub>20</sub> O <sub>14</sub>                  | 21.850 | 220, 282             | 483.0780 | 483.0745 | -7.25  | 305 (100)                     | GC-9, BM-9                                                                                                         | D       |                       |
|                      | 3- <i>O</i> -Methylgallic acid                                 | 43 | 106 | C <sub>8</sub> H <sub>8</sub> O <sub>5</sub>                     | 24.428 | 194, 238, 272        | 183.0299 | 183.0290 | -4.90  | 183 (100)                     | GC-9                                                                                                               | D       |                       |
|                      | Syringic acid                                                  | 64 | 152 | C <sub>9</sub> H <sub>10</sub> O <sub>5</sub>                    | 34.439 | 218, 275             | 197.0455 | 197.0470 | 7.61   | 124 (100), 125 (32), 79 (6)   | C-1, GC-1, BC-1, GM-1, BM-1, C-3, GC-3, BC-3, GM-3, BM-3, C-6, GC-6, BC-6, GM-6, BM-6, C-9, GC-9, BC-9, GM-9, BM-9 | S, D    |                       |
|                      | Gallic acid 1                                                  | 85 | 196 | C <sub>7</sub> H <sub>6</sub> O <sub>5</sub>                     | 44.887 | 194, 270             | 169.0143 | 169.0161 | 10.65  | 83 (100), 107 (72)            | BC-1, BC-3, GC-6, GC-9                                                                                             | D, L    | (6), (10), (14), (17) |
| Hydroxycinnamic acid | Tartaric acid 1                                                | 1  | 2   | C <sub>4</sub> H <sub>6</sub> O <sub>6</sub>                     | 6.171  | 208, 234, 282        | 149.0092 | 149.0089 | -1.48  | 74 (100), 88 (40), 85 (21)    | C-1, GM-1, BM-1, C-3, GM-3, BM-3, C-6, GM-6, BM-6                                                                  | D       |                       |
|                      | Caffeic acid 3-sulfate                                         | 24 | 52  | C <sub>9</sub> H <sub>8</sub> O <sub>7</sub> S                   | 16.471 | 206, 275             | 258.9918 | 258.9880 | -14.66 | 136 (100), 134 (64)           | C-9, BC-9                                                                                                          | D       |                       |
|                      | Glutathionyl caftaric acid                                     | 27 | 62  | C <sub>23</sub> H <sub>27</sub> N <sub>3</sub> O <sub>15</sub> S | 18.638 | 212, 272             | 616.1090 | 616.1133 | 6.98   | 273 (100), 211 (41), 467 (31) | C-1, GC-1, BC-1, C-3, GC-3, BC-3, C-6, GC-6, BC-6, C-9, GC-9                                                       | D, L    | (14), (17)            |

|                                  |    |     |                                                               |        |               |          |          |       |                               |                                                                                                                            |         |           |
|----------------------------------|----|-----|---------------------------------------------------------------|--------|---------------|----------|----------|-------|-------------------------------|----------------------------------------------------------------------------------------------------------------------------|---------|-----------|
| Chlorogenic acid 1               | 31 | 68  | C <sub>16</sub> H <sub>18</sub> O <sub>9</sub>                | 20.153 | 327           | 353.0878 | 353.0894 | 4.53  | 192 (100), 180 (70), 135 (57) | 9, BC-9<br>GE, GC-1, GM-1, GC-3, GM-3, BM-3, GC-6, GM-6, BM-6, GC-9, BC-9, GM-9, BM-9                                      | D, L    | (6), (10) |
| <i>p</i> -Coumaroylquinic acid 1 | 41 | 100 | C <sub>16</sub> H <sub>18</sub> O <sub>8</sub>                | 23.825 | 312           | 337.0929 | 337.0933 | 1.19  | 163 (100), 93 (8)             | GE, BE, GC-1, BC-1, BM-1, GC-3, BC-3, BM-3, GC-6, BC-6, BM-6, BC-9, GM-9, BM-9                                             | D, L    | (6), (9)  |
| Tartaric acid 2                  | 42 | 103 | C <sub>4</sub> H <sub>6</sub> O <sub>6</sub>                  | 24.075 | 194, 210, 298 | 149.0092 | 149.0110 | 12.54 | 73 (100)                      | C-1, BC-1, C-3, BC-3, C-6, C-9, BC-9                                                                                       | D       |           |
| Chlorogenic acid                 | 44 | 108 | C <sub>16</sub> H <sub>18</sub> O <sub>9</sub>                | 24.894 | 242, 327      | 353.0878 | 353.0881 | 0.85  | 173 (100)                     | GE, BE, C-1, GC-1, BC-1, GM-1, BM-1, C-3, GC-3, BC-3, GM-3, BM-3, C-6, GC-6, BC-6, GM-6, BM-6, C-9, GC-9, BC-9, GM-9, BM-9 | S, D, L | (6), (10) |
| Subaphyllin                      | 47 | 118 | C <sub>14</sub> H <sub>20</sub> N <sub>2</sub> O <sub>3</sub> | 25.832 | 216, 246, 344 | 263.1401 | 263.1434 | 12.59 | 97 (100), 92 (37), 190 (34)   | C-1, GM-3                                                                                                                  | D       |           |
| <i>p</i> -Coumaroylquinic acid 2 | 53 | 129 | C <sub>16</sub> H <sub>18</sub> O <sub>8</sub>                | 27.791 | 211, 278      | 337.0929 | 337.0948 | 5.64  | 173 (100), 155 (14), 164 (11) | GE, BE, GC-1, BC-1, BM-1, GC-3, BC-3,                                                                                      | D, L    | (6), (9)  |

|            |                                     |     |     |                                                 |        |                    |          |          |       |                                                   |                                                                                      |         |                |
|------------|-------------------------------------|-----|-----|-------------------------------------------------|--------|--------------------|----------|----------|-------|---------------------------------------------------|--------------------------------------------------------------------------------------|---------|----------------|
|            | Caffeic acid                        | 56  | 133 | C <sub>9</sub> H <sub>8</sub> O <sub>4</sub>    | 29.502 | 208, 290, 326      | 179.0350 | 179.0368 | 10.05 | 134 (100), 136 (95), 107 (22)                     | BM-3, BC-6, BM-6, BC-9, 3BM-9<br>GE, BE, C-1, C-3, C-6, C-9, BC-9                    | S, D, L | (14)           |
|            | <i>p</i> -Coumaroylquinic acid<br>3 | 56  | 134 | C <sub>16</sub> H <sub>18</sub> O <sub>8</sub>  | 29.502 | 216, 276           | 337.0929 | 337.0953 | 7.12  | 173 (100), 174 (50)                               | GE, BE, GC-1, BC-1, BM-1, GC-3, BC-3, BM-3, GC-6, BC-6, BM-6, GC-9, BC-9, GM-9, BM-9 | D, L    | (6), (9)       |
|            | <i>p</i> -Coumaroylquinic acid<br>4 | 59  | 141 | C <sub>16</sub> H <sub>18</sub> O <sub>8</sub>  | 31.447 | 208, 238, 298      | 337.0929 | 337.0967 | 11.33 | 191 (100), 173 (27)                               | BE, BC-1, BC-3, BM-3, GC-6, BC-6, BC-9, 3BM-9                                        | D, L    | (6), (9)       |
|            | Hydrocaffeic acid                   | 96  | 216 | C <sub>9</sub> H <sub>10</sub> O <sub>4</sub>   | 49.100 | 195, 226, 264, 300 | 181.0506 | 181.0519 | 6.73  | 109 (100)                                         | C-1, C-6, C-9, BC-9                                                                  | D       |                |
|            | 3,4-Dimethoxycinnamic acid          | 120 | 259 | C <sub>11</sub> H <sub>12</sub> O <sub>4</sub>  | 60.747 | 224, 327           | 207.0663 | 207.0665 | 0.97  | 135 (100), 134 (64), 179 (53), 136 (18)           | C-1, GC-1, BC-1, C-3, GC-3, BC-3, C-6, GC-6, BC-6, C-9, GC-9, BC-9                   | D, L    | (14)           |
| Flavonoids |                                     |     |     |                                                 |        |                    |          |          |       |                                                   |                                                                                      |         |                |
|            | 3-Deoxyanthocyanidin                | 128 | 271 | C <sub>17</sub> H <sub>26</sub> O <sub>3</sub>  | 66.719 | 200, 222, 254, 486 | 277.1809 | 277.1797 | -4.32 | 277 (100)                                         | GE, BE                                                                               | D       |                |
|            | Flavan-3-ol<br>Theasinensin C 1     | 24  | 51  | C <sub>30</sub> H <sub>26</sub> O <sub>14</sub> | 16.471 | 206, 275           | 609.1250 | 609.1273 | 3.78  | 423 (100), 484 (86), 187 (48), 177 (38)           | GM-1, GM-3, GM-6, GM-9                                                               | D, L    | (4)            |
|            | Theasinensin C 2                    | 25  | 54  | C <sub>30</sub> H <sub>26</sub> O <sub>14</sub> | 17.180 | 206, 275           | 609.1250 | 609.1271 | 3.45  | 406 (100)                                         | GM-1, GM-3                                                                           | D, L    | (4)            |
|            | Gallocatechin                       | 28  | 63  | C <sub>15</sub> H <sub>14</sub> O <sub>7</sub>  | 19.054 | 200, 216, 273      | 305.0667 | 305.0716 | 16.06 | 126 (100), 165 (78), 139 (67), 219 (49), 177 (36) | GE, BE, C-1, GC-1, BC-1, GM-1, BM-1, C-3, GC-3,                                      | S, D, L | (2), (6), (17) |

|                                      |    |    |                                                 |        |               |          |          |       |                                                   |                                                                                                                            |         |           |
|--------------------------------------|----|----|-------------------------------------------------|--------|---------------|----------|----------|-------|---------------------------------------------------|----------------------------------------------------------------------------------------------------------------------------|---------|-----------|
| Theasinensin C 3                     | 32 | 70 | C <sub>30</sub> H <sub>26</sub> O <sub>14</sub> | 20.509 | 206, 276      | 609.1250 | 609.1258 | 1.31  | 424 (100), 305 (72), 441 (37), 125 (32), 592 (10) | BC-3, GM-3, BM-3, C-6, GC-6, BC-6, GM-6, BM-6, C-9, GC-9, BC-9, GM-9, BM-9, GC-1, GM-1, GC-3, GM-3, GC-6, GM-6             | D, L    | (4)       |
| Theacitrin A                         | 34 | 77 | C <sub>37</sub> H <sub>28</sub> O <sub>18</sub> | 21.375 | 206, 274      | 759.1203 | 759.1171 | -4.16 | 759 (100), 742 (52), 607 (36), 425 (16)           | BE                                                                                                                         | D, L    | (4)       |
| Theasinensin B 1                     | 37 | 84 | C <sub>37</sub> H <sub>30</sub> O <sub>18</sub> | 22.193 | 230, 298      | 761.1359 | 761.1305 | -7.09 | 591 (100), 594 (24), 467 (19), 753 (14)           | BE, BC-1, GM-1, BM-1, BC-3, GM-3, BM-3, BC-6, GM-6, BM-6, GM-9, BM-9                                                       | D, L    | (4)       |
| Epigallocatechin                     | 40 | 97 | C <sub>15</sub> H <sub>14</sub> O <sub>7</sub>  | 23.385 | 196, 236, 272 | 305.0667 | 305.0657 | -3.28 | 125 (100), 179 (28), 167 (23), 221 (11)           | GE, BE, C-1, GC-1, BC-1, GM-1, BM-1, C-3, GC-3, BC-3, GM-3, BM-3, C-6, GC-6, BC-6, GM-6, BM-6, C-9, GC-9, BC-9, GM-9, BM-9 | S, D, L | (2), (17) |
| Unknown (epi)gallocatechin conjugate | 40 | 98 | C <sub>30</sub> H <sub>28</sub> O <sub>14</sub> | 23.385 | 196, 236, 272 | 611.1406 | 611.1393 | -2.13 | 306 (100), 305 (95), 307 (18)                     | GE, GC-1, GM-1, GC-3, GM-3, GC-6, BC-6, GM-6, GC-9, GM-9                                                                   | D       |           |

|                                            |    |     |                                                 |        |                 |          |          |        |                                                            |                                                                                                                            |         |                |
|--------------------------------------------|----|-----|-------------------------------------------------|--------|-----------------|----------|----------|--------|------------------------------------------------------------|----------------------------------------------------------------------------------------------------------------------------|---------|----------------|
| Theasinensin B 2                           | 43 | 104 | C <sub>37</sub> H <sub>30</sub> O <sub>18</sub> | 24.428 | 212, 276        | 761.1359 | 761.1411 | 6.83   | 305 (100), 169 (83), 161 (47), 593 (40)                    | GE, BE, GC-1, GM-1, GC-3, GM-3, GC-6, GM-6, GC-9, GM-9                                                                     | D, L    | (4)            |
| Catechin                                   | 46 | 112 | C <sub>15</sub> H <sub>14</sub> O <sub>6</sub>  | 25.502 | 206, 224sh, 285 | 289.0718 | 289.0664 | -18.68 | 289 (100), 245 (65), 232 (50), 165 (42), 137 (38), 93 (37) | GE, BE, C-1, GC-1, BC-1, GM-1, BM-1, C-3, GC-3, BC-3, GM-3, BM-3, C-6, GC-6, BC-6, GM-6, BM-6, C-9, GC-9, BC-9, GM-9, BM-9 | S, D, L | (4), (6), (14) |
| (Epi)gallocatechin-(epi)catechin gallate 1 | 51 | 127 | C <sub>37</sub> H <sub>30</sub> O <sub>17</sub> | 27.305 | 208, 281        | 745.1410 | 745.1456 | 6.17   | 424 (100), 560 (44), 407 (38), 593 (29), 575 (25)          | BE, GC-1, GM-1, GC-3, GM-3, GC-6, GM-6, GC-9, GM-9                                                                         | D, L    | (9)            |
| Theasinensin A                             | 52 | 128 | C <sub>44</sub> H <sub>34</sub> O <sub>22</sub> | 27.498 | 210, 282        | 913.1469 | 913.1527 | 6.35   | 744 (100), 425 (65), 733 (54), 763 (46)                    | GE, BE, GC-1, BC-1, BM-1, GC-3, BC-3, BM-3, GM-9                                                                           | D, L    | (4)            |
| (Epi)gallocatechin-(epi)catechin gallate 2 | 54 | 131 | C <sub>37</sub> H <sub>30</sub> O <sub>17</sub> | 28.239 | 204, 280        | 745.1410 | 745.1453 | 5.77   | 576 (100), 728 (42), 550 (28), 348 (20), 273 (17)          | GC-1, GM-1, GC-3, GM-3, GC-6, GM-6, GC-9, GM-9                                                                             | D, L    | (9)            |
| Epicatechin                                | 56 | 135 | C <sub>15</sub> H <sub>14</sub> O <sub>6</sub>  | 29.502 | 216, 276        | 289.0720 | 289.0747 | 9.34   | 109 (100), 123 (82), 97 (28), 125 (29)                     | GE, BE, C-1, GC-1, BC-1, GM-1, BM-1, C-3, GC-3,                                                                            | S, D, L | (4), (6), (14) |

|                                             |    |     |                                                 |        |               |          |          |        |                                                             |                                                                                                           |         |          |
|---------------------------------------------|----|-----|-------------------------------------------------|--------|---------------|----------|----------|--------|-------------------------------------------------------------|-----------------------------------------------------------------------------------------------------------|---------|----------|
| Epigallocatechin gallate                    | 58 | 137 | C <sub>22</sub> H <sub>18</sub> O <sub>11</sub> | 30.555 | 196, 232, 276 | 457.0776 | 457.0795 | 4.16   | 169 (100), 170 (45)                                         | BC-3, GM-3, BM-3, C-6, GC-6, BC-6, GM-6, BM-6, C-9, GC-9, BC-9, GM-9, BM-9                                | S, D, L | (4), (6) |
| (Epi)gallocatechin-cyanidin-3,5-diglucoside | 58 | 138 | C <sub>42</sub> H <sub>44</sub> O <sub>23</sub> | 30.555 | 196, 234, 277 | 915.2201 | 915.1880 | -35.04 | 169 (100), 170 (32), 458 (18), 459 (15), 457 (12), 305 (12) | GE, BE, C-1, GC-1, BC-1, GM-1, BM-1, C-3, GC-3, BC-3, GM-3, BM-3, C-6, GC-6, BC-6, GM-6, BM-6, GC-9, GM-9 | D, L    | (10)     |
| Gallocatechin gallate dimer                 | 58 | 140 | C <sub>44</sub> H <sub>36</sub> O <sub>22</sub> | 30.555 | 196, 232, 276 | 915.1625 | 915.1680 | 6.01   | 170 (100), 458 (79), 459 (63), 171 (49)                     | BE, GC-9, GM-9                                                                                            | D, L    | (7)      |
| Gallocatechin gallate                       | 63 | 149 | C <sub>22</sub> H <sub>18</sub> O <sub>11</sub> | 33.413 | 210, 275, 334 | 457.0776 | 457.0808 | 7.00   | 170 (100)                                                   | GC-1, GM-1, GC-3, GM-3, GC-6, GM-6                                                                        | S, D    |          |
| Theasinensin B 3                            | 65 | 155 | C <sub>37</sub> H <sub>30</sub> O <sub>18</sub> | 35.315 | 208, 281      | 761.1359 | 761.1315 | -5.78  | 761 (100), 591 (39), 743 (28)                               | GE, BE, C-1, GC-1, BC-1, GM-1, BM-1, C-3, GC-3, BC-3, GM-3, BM-3, C-6, GC-6, BC-6, GM-6, BM-6, GM-9       | D, L    | (4)      |
| Epigallocatechin 3,3'-di-gallate            | 74 | 171 | C <sub>29</sub> H <sub>22</sub> O <sub>15</sub> | 38.451 | 228, 310      | 609.0886 | 609.0902 | 2.63   | 457 (100), 306 (71), 573 (39)                               | GM-9                                                                                                      | D, L    | (9)      |
| (Epi)catechin gallate dimer                 | 76 | 174 | C <sub>44</sub> H <sub>36</sub> O <sub>20</sub> | 39.622 | 196, 232, 280 | 883.1727 | 883.1759 | 3.62   | 442 (100), 441 (81), 443 (77), 289 (9)                      | GE, GC-1, GC-3                                                                                            | D, L    | (20)     |



|                                                       |     |     |                                                 |        |                 |          |          |        |                                         |                                                                                                                                                           |         |               |
|-------------------------------------------------------|-----|-----|-------------------------------------------------|--------|-----------------|----------|----------|--------|-----------------------------------------|-----------------------------------------------------------------------------------------------------------------------------------------------------------|---------|---------------|
| Epicatechin gallate                                   | 76  | 176 | C <sub>22</sub> H <sub>18</sub> O <sub>10</sub> | 39.622 | 196, 232, 280   | 441.0827 | 441.0844 | 3.85   | 169 (100), 290 (61), 170 (51)           | GC-3, BC-3, GM-3, GC-6, GM-6, GC-9, GM-9, GE, BE, C-1, GC-1, BC-1, GM-1, BM-1, C-3, GC-3, BC-3, GM-3, BM-3, C-6, GC-6, BC-6, GM-6, BM-6, GC-9, GM-9, BM-9 | S, D, L | (2), (6), (9) |
| Epicatechin gallate 1                                 | 79  | 182 | C <sub>22</sub> H <sub>18</sub> O <sub>10</sub> | 41.522 | 208, 276        | 441.0827 | 441.0844 | 3.85   | 290 (100), 246 (14), 272 (13)           | GE, GC-1, GM-1, GC-3, GM-3, GC-6, GM-6, GC-9                                                                                                              | D, L    | (2), (6), (9) |
| Theacitrin C                                          | 89  | 203 | C <sub>44</sub> H <sub>32</sub> O <sub>22</sub> | 46.401 | 194, 277        | 911.1312 | 911.1406 | 10.22  | 875 (100), 396 (95), 850 (75)           | BE                                                                                                                                                        | D, L    | (13)          |
| Methyl epicatechin gallate                            | 90  | 204 | C <sub>23</sub> H <sub>20</sub> O <sub>10</sub> | 46.533 | 194, 280        | 455.0984 | 455.1007 | 5.05   | 79 (100), 181 (50), 283 (31)            | GE, BE, GM-1, GC-3, GM-3                                                                                                                                  | D, L    | (2)           |
| Epiafzelechin 3-gallate                               | 92  | 209 | C <sub>22</sub> H <sub>18</sub> O <sub>9</sub>  | 47.594 | 194, 206sh, 275 | 425.0878 | 425.0884 | 1.41   | 274 (100), 169 (10), 255 (9)            | GE, BE, GC-1, GM-1, GC-3, GM-3, GM-6                                                                                                                      | D, L    | (11)          |
| Epicatechin-3,5-digallate                             | 96  | 217 | C <sub>29</sub> H <sub>22</sub> O <sub>14</sub> | 49.100 | 208, 282        | 593.0937 | 593.0977 | 6.74   | 563 (100), 443 (36), 476 (27), 523 (27) | GE, GM-1, GM-3, GC-9, GM-9, BM-9                                                                                                                          | D, L    | (18)          |
| Epigallocatechin gallate-4',4''-O-β-D-glucopyranoside | 98  | 219 | C <sub>34</sub> H <sub>38</sub> O <sub>21</sub> | 50.154 | 248, 364        | 781.1833 | 781.2199 | 46.85  | 607 (100)                               | GE, GC-1, GM-1, 4GM-9                                                                                                                                     | D, L    | (22)          |
| Unknown (epi)catechin glucoside                       | 100 | 222 | C <sub>21</sub> H <sub>24</sub> O <sub>11</sub> | 50.678 | 210, 226sh, 316 | 451.1246 | 451.1080 | -36.70 | 161 (100), 417 (55), 286 (54)           | GE                                                                                                                                                        | D, L    | (21)          |
| Unknown di(epi)catechin-dimethylglyoxal adduct        | 102 | 226 | C <sub>36</sub> H <sub>36</sub> O <sub>16</sub> | 51.259 | 214, 316        | 723.1931 | 723.5140 | 443.76 | 678 (100), 679 (17)                     | BE                                                                                                                                                        | D, L    | (3)           |
| Epigallocatechin 3-O-gallate-7-O-glucoside-           | 106 | 231 | C <sub>22</sub> H <sub>18</sub> O <sub>11</sub> | 54.599 | 210, 276        | 795.1625 | 795.1700 | 9.43   | 463 (100), 490 (61), 305 (48), 331 (39) | GC-9                                                                                                                                                      | D, L    | (15)          |

|                                      |                                                                                                                                                                                           |     |     |                                                                |        |                      |          |          |       |                                                   |                                                                      |      |     |
|--------------------------------------|-------------------------------------------------------------------------------------------------------------------------------------------------------------------------------------------|-----|-----|----------------------------------------------------------------|--------|----------------------|----------|----------|-------|---------------------------------------------------|----------------------------------------------------------------------|------|-----|
|                                      | 4"- <i>O</i> -glucuronide                                                                                                                                                                 |     |     |                                                                |        |                      |          |          |       |                                                   |                                                                      |      |     |
|                                      | Theasinensin F                                                                                                                                                                            | 109 | 235 | C <sub>44</sub> H <sub>34</sub> O <sub>21</sub>                | 55.721 | 228, 380             | 897.1520 | 897.1536 | 1.80  | 441 (100), 285 (47), 855 (37)                     | GM-9                                                                 | D    |     |
|                                      | Epiphylloumarin-<br>[4β→8]-(-)-epicatechin-<br>[4β→8]-(-)-epicatechin                                                                                                                     | 113 | 242 | C <sub>48</sub> H <sub>38</sub> O <sub>19</sub>                | 58.117 | 320                  | 917.1935 | 917.2600 | 67.85 | 887 (100)                                         | BE                                                                   | D    |     |
|                                      | Epitheaflavic acid 3'-<br>gallate                                                                                                                                                         | 114 | 244 | C <sub>28</sub> H <sub>20</sub> O <sub>14</sub>                | 58.315 | 208, 282, 398        | 579.0780 | 579.0900 | 22.19 | 150 (100), 505 (47), 193 (38), 339 (35)           | BE                                                                   | D    |     |
|                                      | Theaflavic acid                                                                                                                                                                           | 115 | 246 | C <sub>21</sub> H <sub>16</sub> O <sub>10</sub>                | 58.863 | 282, 396             | 427.0671 | 427.0727 | 13.16 | 227 (100), 137 (66)                               | BE                                                                   | D    |     |
|                                      | Theaflavin                                                                                                                                                                                | 115 | 247 | C <sub>29</sub> H <sub>24</sub> O <sub>12</sub>                | 58.863 | 210, 268, 298, 365sh | 563.1195 | 563.1227 | 5.68  | 546 (100), 523 (91), 138 (81), 231 (77), 486 (53) | GE, BE, BC-1, BC-3                                                   | D, L | (6) |
|                                      | Theaflavin 3-gallate                                                                                                                                                                      | 118 | 255 | C <sub>36</sub> H <sub>28</sub> O <sub>16</sub>                | 59.832 | 210, 270             | 715.1305 | 715.1359 | 7.55  | 564 (100)                                         | GE, BE, BC-1, BC-3                                                   | D, L | (6) |
|                                      | Epitheafagallin 3- <i>O</i> -<br>gallate                                                                                                                                                  | 119 | 256 | C <sub>27</sub> H <sub>20</sub> O <sub>13</sub>                | 60.230 | 214, 314             | 551.0831 | 551.0922 | 16.52 | 125 (100), 234 (31), 295 (30), 187 (25)           | BE                                                                   | D, L | (8) |
|                                      | Theaflavin-3,3'-gallate                                                                                                                                                                   | 119 | 257 | C <sub>43</sub> H <sub>32</sub> O <sub>20</sub>                | 60.230 | 208, 277, 378        | 867.1414 | 867.1475 | 7.03  | 715 (100)                                         | GE, BE, BC-1, BC-3                                                   | D, L | (6) |
| Flavanonol                           | Katuranin 2                                                                                                                                                                               | 102 | 225 | C <sub>15</sub> H <sub>12</sub> O <sub>6</sub>                 | 51.259 | 204, 268, 316        | 287.0561 | 287.0549 | -4.15 | 125 (100), 260 (17)                               | GE, BE, C-9                                                          | D    |     |
| Flavone                              | Apigenin 6,8-di- <i>C</i> -<br>glucoside                                                                                                                                                  | 55  | 132 | C <sub>27</sub> H <sub>30</sub> O <sub>15</sub>                | 29.077 | 272, 352             | 593.1512 | 593.1541 | 4.89  | 391 (100)                                         | BE, BC-1, GM-1, BM-1, GC-3, BC-3, GM-3, BM-3, BC-6, GM-6, BM-6, GC-9 | D, L | (4) |
| Flavonoid- <i>O</i> -<br>glucuronide | 6-[6-((6-[(6-Aminopyridin-3-yl)methyl]-2-(3,4-dihydroxyphenyl)-5-hydroxy-4-oxo-4 <i>H</i> -chromen-7-yl}oxy)-3,4,5-trihydroxyoxane-2-carboxyloxy]-3,4,5-trihydroxyoxane-2-carboxylic acid | 104 | 229 | C <sub>33</sub> H <sub>32</sub> N <sub>2</sub> O <sub>18</sub> | 52.761 | 195, 280, 330        | 743.1577 | 743.1546 | -4.22 | 439 (100), 302 (94), 147 (83), 573 (47)           | GC-9                                                                 | D    |     |
| Flavonoid- <i>O</i> -glycoside       | Tilioside 1                                                                                                                                                                               | 29  | 65  | C <sub>30</sub> H <sub>26</sub> O <sub>13</sub>                | 19.574 | 204, 274             | 593.1301 | 593.1334 | 5.56  | 426 (100), 289 (34), 409 (30), 304 (17)           | GC-1, GM-1, GC-3, GM-3, GM-6, GC-9, GM-9                             | D    |     |
|                                      | Tilioside 2                                                                                                                                                                               | 33  | 74  | C <sub>30</sub> H <sub>26</sub> O <sub>13</sub>                | 20.888 | 200, 268sh, 334      | 593.1301 | 593.1351 | 8.43  | 426 (100), 177 (17), 468 (23), 380 (10)           | GC-1, GC-9, GM-9                                                     | D    |     |
|                                      | Tilioside 3                                                                                                                                                                               | 39  | 94  | C <sub>30</sub> H <sub>26</sub> O <sub>13</sub>                | 22.905 | 216, 260, 294sh      | 593.1301 | 593.1345 | 7.42  | 424 (100), 287 (11), 177 (10)                     | GC-1, GM-1                                                           | D    |     |
|                                      | Miscanthoside                                                                                                                                                                             | 81  | 190 | C <sub>21</sub> H <sub>22</sub> O <sub>11</sub>                | 42.668 | 204, 230sh, 295      | 449.1089 | 449.1124 | 7.65  | 286 (100), 355 (50), 381 (24), 324 (22), 284 (19) | C-1, C-6, C-9                                                        | D    |     |

|          |                                                                                        |     |     |                                                 |        |               |          |          |       |                                                   |                                                                                                           |      |      |
|----------|----------------------------------------------------------------------------------------|-----|-----|-------------------------------------------------|--------|---------------|----------|----------|-------|---------------------------------------------------|-----------------------------------------------------------------------------------------------------------|------|------|
|          | Unknown flavonoid-7- <i>O</i> -glycoside 1 (myriophylloside B or myriophylloside type) | 114 | 243 | C <sub>41</sub> H <sub>44</sub> O <sub>22</sub> | 58.315 | 210, 285      | 887.2251 | 887.2325 | 8.34  | 840 (100)                                         | BC-1, GM-1, GC-3, GM-3, BM-3, GC-6, GM-6, BM-6, GC-9, BC-9                                                | D    |      |
|          | Unknown flavonoid-7- <i>O</i> -glycoside 2 (myriophylloside D or myriophylloside type) | 118 | 254 | C <sub>41</sub> H <sub>44</sub> O <sub>21</sub> | 59.832 | 266, 318      | 871.2302 | 871.2324 | 2.53  | 828 (100), 585 (78)                               | BC-1, GM-1, GM-3, BM-3, BM-6, GC-9, BC-9, GM-9, BM-9                                                      | D    |      |
|          | Tiliroside 4                                                                           | 120 | 258 | C <sub>30</sub> H <sub>26</sub> O <sub>13</sub> | 60.747 | 206, 268, 372 | 593.1301 | 593.1290 | -1.85 | 563 (100), 483 (33), 413 (66), 284 (22), 531 (18) | GC-1, GM-1, GC-3, GM-3, BM-3, BM-6, GM-9, BM-9                                                            | D    |      |
| Flavonol | Quercetin 3- <i>O</i> -di-galactoside/glucoside                                        | 65  | 154 | C <sub>27</sub> H <sub>30</sub> O <sub>17</sub> | 35.315 | 208, 281      | 625.1410 | 625.1448 | 6.08  | 317 (100)                                         | GE, BE, C-1, GC-1, BC-1, GM-1, BM-1, C-3, GC-3, BC-3, GM-3, BM-3, C-6, GC-6, BC-6, GM-6, BM-6, GC-9, GM-9 | D, L | (5)  |
|          | Myricetin 3- <i>O</i> -glucoside                                                       | 67  | 158 | C <sub>21</sub> H <sub>20</sub> O <sub>13</sub> | 36.197 | 254, 343      | 479.0831 | 479.0810 | -4.43 | 316 (100), 271 (14)                               | BE                                                                                                        | D, L | (10) |
|          | Myricetin-3- <i>O</i> -galactoside 1                                                   | 68  | 159 | C <sub>21</sub> H <sub>20</sub> O <sub>13</sub> | 36.379 | 212, 270, 350 | 479.0831 | 479.0858 | 5.64  | 318 (100), 328 (19), 152 (17)                     | GE, C-1, GC-1, BC-1, GM-1, BM-1, C-3, GC-3, BC-3, GM-3, BM-3, C-6, GC-6, BC-6, GM-6, BM-6,                | D, L | (10) |

|                                                         |    |     |                                                 |        |               |          |          |       |                                         |                                                                                                                                                                |         |          |
|---------------------------------------------------------|----|-----|-------------------------------------------------|--------|---------------|----------|----------|-------|-----------------------------------------|----------------------------------------------------------------------------------------------------------------------------------------------------------------|---------|----------|
| Myricetin-3- <i>O</i> -galactoside 2                    | 69 | 160 | C <sub>21</sub> H <sub>20</sub> O <sub>13</sub> | 36.799 | 210, 264, 360 | 479.0831 | 479.0862 | 6.47  | 318 (100), 289 (13)                     | GC-9, GM-9, GE, BE, GC-1, BC-1, GM-1, BM-1, GC-3, BC-3, GM-3, GC-6, GM-6, GC-9, BC-9, GM-9, GE, BE, BC-1, BM-1, GC-3, BC-3, GM-3, BM-3, BC-6, BM-6, BC-9, BM-9 | D, L    | (10)     |
| Quercetin 3- <i>O</i> -glucosylrutinoside 1             | 70 | 161 | C <sub>33</sub> H <sub>40</sub> O <sub>21</sub> | 37.066 | 206, 268, 350 | 771.1989 | 771.2065 | 9.85  | 675 (100)                               | GC-9, GE, BE, BC-1, BM-1, GC-3, BC-3, GM-3, BM-3, BC-6, BM-6, BC-9, BM-9                                                                                       | D, L    | (4), (9) |
| Kaempferol 3- <i>O</i> -rutinoside 1                    | 72 | 164 | C <sub>27</sub> H <sub>30</sub> O <sub>15</sub> | 37.274 | 216, 271, 347 | 593.1512 | 593.1553 | 6.91  | 440 (100), 294 (92)                     | GC-1, BC-1, GM-1, BM-1, BC-3, BM-3, GC-6, GM-6, GC-9, GM-9, BM-9                                                                                               | D, L    | (6)      |
| Quercetin 3- <i>O</i> -glucosylrutinoside 2             | 73 | 167 | C <sub>33</sub> H <sub>40</sub> O <sub>21</sub> | 38.075 | 208, 260, 360 | 771.1989 | 771.2077 | 11.41 | 302 (100), 730 (52)                     | GC-1, BC-1, GM-1, BM-1, BC-3, BM-3, GC-6, GM-6, GC-9, BC-9, GM-9, BM-9                                                                                         | D, L    | (4), (9) |
| Kaempferol 3- <i>O</i> -glucosylrhamnosyl-galactoside 1 | 77 | 177 | C <sub>33</sub> H <sub>40</sub> O <sub>20</sub> | 40.518 | 200, 264, 350 | 755.2040 | 755.2013 | -3.61 | 285 (100), 755 (69), 286 (18), 284 (15) | BE                                                                                                                                                             | D       |          |
| Rutin                                                   | 77 | 178 | C <sub>27</sub> H <sub>30</sub> O <sub>16</sub> | 40.518 | 204, 258, 357 | 609.1461 | 609.1490 | 4.76  | 301 (100), 458 (27), 179 (10)           | GE, BE, C-1, GC-                                                                                                                                               | S, D, L | (2), (4) |

|                                                         |    |     |                                                 |        |               |          |          |       |                     |                                                                                                                                                                           |         |           |
|---------------------------------------------------------|----|-----|-------------------------------------------------|--------|---------------|----------|----------|-------|---------------------|---------------------------------------------------------------------------------------------------------------------------------------------------------------------------|---------|-----------|
| Quercetin-3- <i>O</i> -glucoside 2                      | 80 | 186 | C <sub>21</sub> H <sub>20</sub> O <sub>12</sub> | 42.306 | 208, 258, 356 | 463.0882 | 463.0890 | 1.73  | 301 (100)           | 1, BC-1, GM-1, BM-1, C-3, GC-3, BC-3, GM-3, BM-3, C-6, GC-6, BC-6, GM-6, BM-6, GC-9, BC-9, GM-9, BM-9, GE, BE, GC-1, GM-1, GC-3, GM-3, GC-6, BC-6, GM-6, GC-9, GM-9, BM-9 | D, L    | (9)       |
| Kaempferol 3- <i>O</i> -glucosylrhamnosyl-galactoside 2 | 80 | 187 | C <sub>33</sub> H <sub>40</sub> O <sub>20</sub> | 42.306 | 200, 268, 350 | 755.2040 | 755.2166 | 16.68 | 285 (100), 415 (9)  | GE, BE, BC-1, GM-1, BM-1, GC-3, BC-3, GM-3, BM-3, BC-6, BM-6, BC-9, BM-9                                                                                                  | D       |           |
| Quercetin 3- <i>O</i> -galactoside                      | 82 | 192 | C <sub>21</sub> H <sub>20</sub> O <sub>12</sub> | 42.886 | 208, 258, 357 | 463.0882 | 463.0892 | 2.16  | 179 (100), 389 (77) | GE, BE, C-1, GC-1, BC-1, GM-1, BM-1, C-3, GC-3, BC-3, GM-3, BM-3, C-6, GC-6, BC-6, GM-6, BM-6, GC-9, BC-9, GM-9                                                           | S, D, L | (6), (17) |
| Kaempferol 3- <i>O</i> -rutinoside 2                    | 83 | 193 | C <sub>27</sub> H <sub>30</sub> O <sub>15</sub> | 43.739 | 206, 254, 342 | 593.1512 | 593.1516 | 0.67  | 498 (100)           | GE, BE, C-1, GC-                                                                                                                                                          | D, L    | (6)       |

|                                                                                  |    |     |                                                 |        |                    |          |          |       |                               |                                                                                                                           |         |     |
|----------------------------------------------------------------------------------|----|-----|-------------------------------------------------|--------|--------------------|----------|----------|-------|-------------------------------|---------------------------------------------------------------------------------------------------------------------------|---------|-----|
| Kaempferol 3- <i>O</i> -(6- <i>O</i> -rhamnosyl-hexoside)7- <i>O</i> -rhamnoside | 84 | 194 | C <sub>33</sub> H <sub>40</sub> O <sub>19</sub> | 44.325 | 212, 240, 268, 342 | 739.2091 | 739.2080 | -1.49 | 593 (100)                     | 1, BC-1, GM-1, BM-1, C-3, GC-3, BC-3, GM-3, BM-3, C-6, GC-6, BC-6, GM-6, BM-6, GE, BE, GC-1, GM-1, GC-3, GM-3, GC-9, GM-9 | D       |     |
| Kaempferol 3- <i>O</i> -rutinoside 3                                             | 87 | 198 | C <sub>27</sub> H <sub>30</sub> O <sub>15</sub> | 45.751 | 198, 268, 349      | 593.1512 | 593.1510 | -0.34 | 483 (100), 563 (48), 286 (44) | GE, BE, GC-1, BC-1, GM-1, BM-1, GC-3, BC-3, GM-3, BM-3, GC-6, GM-6, GC-9, BC-9, GM-9, BM-9                                | D, L    | (6) |
| Kaempferol 3- <i>O</i> -glucoside 1                                              | 89 | 201 | C <sub>21</sub> H <sub>20</sub> O <sub>11</sub> | 46.401 | 194, 280           | 447.0933 | 447.0955 | 4.92  | 285 (100)                     | GE, BE, BC-1, BC-3, GC-6, BC-6, BM-6                                                                                      | D, L    | (9) |
| Kaempferol 7-(6"-galloyl)glucoside)                                              | 89 | 202 | C <sub>28</sub> H <sub>24</sub> O <sub>15</sub> | 46.401 | 194, 210sh, 280    | 599.1042 | 599.1044 | 0.26  | 301 (100)                     | BE, GC-1, GM-9                                                                                                            | D       |     |
| Kaempferol 3- <i>O</i> -glucoside                                                | 94 | 212 | C <sub>21</sub> H <sub>20</sub> O <sub>11</sub> | 48.399 | 198, 266, 350      | 447.0933 | 447.0942 | 2.01  | 284 (100), 447 (58)           | GE, BE, C-1, GC-1, BC-1, GM-1, BM-1, C-3, GC-3, BC-3, GM-3, BM-3, C-6, GC-6, BC-6, GM-6, BM-6, GC-9, BC-9                 | S, D, L | (9) |

|                                                        |     |     |                                                 |        |               |          |          |        |                                         |                                                                                                                       |         |              |
|--------------------------------------------------------|-----|-----|-------------------------------------------------|--------|---------------|----------|----------|--------|-----------------------------------------|-----------------------------------------------------------------------------------------------------------------------|---------|--------------|
| Kaempferol 3- <i>O</i> -glucoside 3                    | 101 | 223 | C <sub>21</sub> H <sub>20</sub> O <sub>11</sub> | 51.044 | 198, 266, 350 | 447.0933 | 447.0904 | -6.49  | 300 (100), 258 (38), 374 (36), 179 (32) | GC-9, BC-9, GM-9, BM-9                                                                                                | D, L    | (9)          |
| Quercetagenin                                          | 108 | 234 | C <sub>15</sub> H <sub>10</sub> O <sub>8</sub>  | 55.294 | 228, 380      | 317.0303 | 317.0279 | -7.57  | 151 (100), 137 (92), 255 (29)           | GC-9                                                                                                                  | D       |              |
| Quercetin 1                                            | 109 | 236 | C <sub>15</sub> H <sub>10</sub> O <sub>7</sub>  | 55.721 | 228, 380      | 301.0354 | 301.0351 | -1.00  | 301 (100)                               | GC-1, GM-1, GM-3, GC-9, GM-9                                                                                          | D, L    | (17)         |
| Unknown quercetin conjugate 1                          | 113 | 241 | C <sub>42</sub> H <sub>46</sub> O <sub>22</sub> | 58.117 | 210, 270, 318 | 901.2408 | 901.2466 | 6.44   | 757 (100), 302 (17)                     | GE, BE, C-1, GC-1, BC-1, GM-1, BM-1, C-3, GC-3, BC-3, GM-3, BM-3, C-6, GC-6, BC-6, GM-6, BM-6, GC-9, BC-9, GM-9       | D, L    | (6)          |
| Kaempferol 3-(2G-xylosylrutinoside)-7-glucoside        | 114 | 245 | C <sub>38</sub> H <sub>48</sub> O <sub>24</sub> | 58.315 | 208, 282, 398 | 887.2463 | 887.2400 | -4.54  | 858 (100)                               | BE, GM-9, BM-9                                                                                                        | D       |              |
| Unknown kaempferol conjugate                           | 115 | 248 | C <sub>42</sub> H <sub>46</sub> O <sub>21</sub> | 58.863 | 212, 270, 315 | 885.2459 | 885.2456 | -0.34  | 740 (100), 787 (72), 792 (69)           | GE, BE, C-1, GC-1, BC-1, GM-1, BM-1, C-3, GC-3, BC-3, GM-3, BM-3, C-6, GC-6, BC-6, GM-6, BM-6, GC-9, BC-9, GM-9, BM-9 | D, L    | (6)          |
| Unknown quercetin conjugate 2                          | 116 | 249 | C <sub>42</sub> H <sub>46</sub> O <sub>22</sub> | 59.059 | 206, 316      | 901.2408 | 901.2262 | -16.20 | 755 (100)                               | GC-9, GM-9, BM-9                                                                                                      | D, L    | (6)          |
| Kaempferol 3- <i>O</i> -glucosylrhamnosylgalactoside 3 | 116 | 250 | C <sub>33</sub> H <sub>40</sub> O <sub>20</sub> | 59.059 | 206, 316      | 755.2040 | 755.1815 | -29.79 | 289 (100), 745 (59)                     | GE, GM-1, GC-3, GM-3, GC-9, GM-9                                                                                      | D       |              |
| Quercetin                                              | 121 | 261 | C <sub>15</sub> H <sub>10</sub> O <sub>7</sub>  | 61.100 | 206, 258, 374 | 301.0354 | 301.0385 | 10.30  | 151 (100), 179 (51), 107 (13)           | GE, BE, GC-1,                                                                                                         | S, D, L | L data 9, 10 |

|                  |                                                                                                                                                                                                            |     |     |                                                   |        |                 |          |          |       |                                         |                                                                                                                    |         |      |
|------------------|------------------------------------------------------------------------------------------------------------------------------------------------------------------------------------------------------------|-----|-----|---------------------------------------------------|--------|-----------------|----------|----------|-------|-----------------------------------------|--------------------------------------------------------------------------------------------------------------------|---------|------|
|                  | Kaempferol                                                                                                                                                                                                 | 124 | 266 | C <sub>15</sub> H <sub>10</sub> O <sub>6</sub>    | 63.686 | 228, 370        | 285.0405 | 285.0392 | -4.56 | 257 (100), 227 (74), 210 (47), 151 (45) | GM-1, BM-1, GC-3, GM-3, BM-3, GC-6, GM-6, BM-6, GC-9, GM-9, GE, BE, GC-1, GM-1, GC-3, GM-3, GM-6, GC-9, GM-9, BM-9 | S, D, L | (17) |
| Isoflavonoid     | 3-Oxo-3-[[3,4,5-trihydroxy-6-(3-hydroxy-14-methoxy-8,17-dioxatetracyclo[8.7.0.0 <sup>2</sup> ,7.0 <sup>11</sup> ,1 <sup>6</sup> ]heptadeca-2,4,6,11,13,15-hexaen-5-yl]oxy)oxan-2-yl]methoxy}propanoic acid | 75  | 173 | C <sub>25</sub> H <sub>26</sub> O <sub>13</sub>   | 39.040 | 220, 274, 338   | 533.1301 | 533.1362 | 11.44 | 441 (100), 97 (20)                      | BC-1, GM-1, BM-1, GC-3, BC-3, GM-3, BM-3, BC-6, BM-6, GC-9, BC-9, GM-9, BM-9                                       | D       |      |
| Neoflavone       | Dihydrogenistin                                                                                                                                                                                            | 103 | 228 | C <sub>21</sub> H <sub>22</sub> O <sub>10</sub>   | 52.494 | 195, 280, 330   | 433.1140 | 433.1099 | -9.51 | 180 (100), 259 (62), 126 (12)           | C-9                                                                                                                | D       |      |
| Neoflavone       | 8-Methyl-2-oxo-4-phenyl-2 <i>H</i> -chromen-7-yl 2-(4-methylbenzenesulfonamido)-3-phenylpropanoate                                                                                                         | 99  | 220 | C <sub>32</sub> H <sub>27</sub> NO <sub>6</sub> S | 50.467 | 224, 280        | 552.1486 | 552.1455 | -5.67 | 401 (100), 382 (60), 236 (24), 508 (10) | GC-9, GM-9                                                                                                         | D       |      |
| Proanthocyanidin | Procyanidin B3                                                                                                                                                                                             | 38  | 89  | C <sub>30</sub> H <sub>26</sub> O <sub>12</sub>   | 22.477 | 204, 213sh, 282 | 577.1351 | 577.1394 | 7.45  | 484 (100), 370 (18), 543 (14), 481 (12) | C-1, GC-1, BC-1, GM-1, C-3, GC-3, BC-3, GM-3, GM-6, GC-9, GM-9                                                     | D, L    | (17) |
| Proanthocyanidin | Procyanidin B1                                                                                                                                                                                             | 49  | 123 | C <sub>30</sub> H <sub>26</sub> O <sub>12</sub>   | 26.435 | 204, 282        | 577.1351 | 577.1390 | 6.76  | 290 (100), 426 (34), 560 (19)           | GE, BE, GC-1, BC-1, GM-1, BM-1, C-3, GC-3, BC-3, GM-3, BM-3, C-                                                    | S, D, L | (17) |



|                            |                                                                         |     |     |                                                               |        |               |          |          |        |                                         |                                                                                               |         |      |
|----------------------------|-------------------------------------------------------------------------|-----|-----|---------------------------------------------------------------|--------|---------------|----------|----------|--------|-----------------------------------------|-----------------------------------------------------------------------------------------------|---------|------|
|                            |                                                                         |     |     |                                                               |        |               |          |          |        |                                         | 6, GC-6, BC-6, GM-6, BM-6, C-9, GC-9, BC-9, GM-9, BM-9                                        |         |      |
|                            | Procyanidin B2                                                          | 50  | 124 | C <sub>30</sub> H <sub>26</sub> O <sub>12</sub>               | 27.127 | 204, 325      | 577.1351 | 577.1393 | 7.28   | 408 (100), 261 (18), 485 (17), 287 (15) | GE, BE, C-1, GC-1, BC-1, GM-1, BM-1, C-3, GC-3, BC-3, GM-3, BM-3, C-6, GC-6, BC-6, GM-6, BM-6 | S, D, L | (17) |
|                            | Procyanidin B1 3-O-gallate                                              | 59  | 142 | C <sub>37</sub> H <sub>30</sub> O <sub>16</sub>               | 31.447 | 208, 282, 310 | 729.1461 | 729.1497 | 4.94   | 635 (100), 636 (40)                     | GE, BE, C-1, GC-1, BC-1, GM-1, BM-1, C-3, GC-3, BC-3, GM-3, BM-3, C-6, GC-6, BC-6, GM-6, BM-6 | D       |      |
|                            | Procyanidin B2 3-O-gallate                                              | 61  | 147 | C <sub>37</sub> H <sub>30</sub> O <sub>16</sub>               | 32.412 | 204, 280      | 729.1461 | 729.1530 | 9.46   | 636 (100)                               | GC-1, BC-1, GM-1, BC-3, GM-3, GC-6, GC-9, BM-9                                                | D       |      |
| Pyranoflavonoid            | Unknown pyranoflavonoid                                                 | 90  | 205 | C <sub>45</sub> H <sub>50</sub> N <sub>4</sub> O <sub>7</sub> | 46.533 | 194, 280      | 757.3607 | 757.3591 | -2.08  | 271 (100), 485 (82)                     | GC-3                                                                                          | D       |      |
| Others: phenolic compounds |                                                                         |     |     |                                                               |        |               |          |          |        |                                         |                                                                                               |         |      |
| Anthraquinone              | Unknown anthraquinone                                                   | 16  | 36  | C <sub>28</sub> H <sub>33</sub> O <sub>18</sub> P             | 13.807 | 194, 282      | 687.1332 | 687.1348 | 2.32   | 343 (100)                               | GC-9, BM-9                                                                                    | D       |      |
| Benzenediol                | 2-(3,4-Dihydroxyphenyl)-3,5,7-trihydroxy-4a,8a-dihydro-4H-chromen-4-one | 79  | 183 | C <sub>15</sub> H <sub>12</sub> O <sub>7</sub>                | 41.522 | 205, 290      | 303.0510 | 303.0522 | 3.71   | 217 (100)                               | C-1, C-6, C-9                                                                                 | D       |      |
| Benzenetriol               | Pyrogallol                                                              | 17  | 38  | C <sub>6</sub> H <sub>6</sub> O <sub>3</sub>                  | 14.146 | 214, 271      | 125.0244 | 125.0243 | -1.02  | 125 (100), 81 (13), 97 (11)             | BE                                                                                            | D       |      |
| Benzopyran                 | 7,8-Dihydroxy-3-propyl-                                                 | 124 | 265 | C <sub>12</sub> H <sub>16</sub> O <sub>5</sub>                | 63.686 | 228, 370      | 239.0925 | 239.0897 | -11.70 | 124 (100), 168 (29)                     | GC-9,                                                                                         | D       |      |

|                     |                                                                                                                                                                    |     |     |                                                                 |        |                      |          |          |        |                               |                                                                            |      |      |
|---------------------|--------------------------------------------------------------------------------------------------------------------------------------------------------------------|-----|-----|-----------------------------------------------------------------|--------|----------------------|----------|----------|--------|-------------------------------|----------------------------------------------------------------------------|------|------|
|                     | 3,4,5,6,7,8-hexahydro-1 <i>H</i> -2-benzopyran-1,5-dione                                                                                                           |     |     |                                                                 |        |                      |          |          |        |                               | BC-9                                                                       |      |      |
|                     | 8-Hydroxycannabinol                                                                                                                                                | 128 | 270 | C <sub>21</sub> H <sub>26</sub> O <sub>3</sub>                  | 66.719 | 200, 222, 254, 486   | 325.1809 | 325.1828 | 5.79   | 325 (100)                     | C-9, GC-9, BC-9, GM-9, BM-9                                                | D    |      |
| C-Glycosyl compound | Unknown C-glycosyl compound (5-ethyl-2-(hydroxymethyl)-1 <i>H</i> -indol-3-yl 3,4,5-trihydroxy-5-(hydroxymethyl)oxolane-2-carboxylate or C-glycosyl compound type) | 60  | 143 | C <sub>17</sub> H <sub>21</sub> NO <sub>8</sub>                 | 32.078 | 202, 224, 282        | 366.1194 | 366.1219 | 6.69   | 142 (100), 322 (79), 300 (48) | C-1, C-9                                                                   | D    |      |
| Coumarin glycoside  | Aspergillazine C 1                                                                                                                                                 | 86  | 197 | C <sub>20</sub> H <sub>22</sub> N <sub>2</sub> O <sub>8</sub> S | 45.255 | 194, 270             | 449.1024 | 449.1039 | 3.21   | 286 (100), 199 (30)           | C-9                                                                        | D    |      |
|                     | Aspergillazine C 2                                                                                                                                                 | 94  | 213 | C <sub>20</sub> H <sub>22</sub> N <sub>2</sub> O <sub>8</sub> S | 48.399 | 198, 266, 350        | 449.1024 | 449.1057 | 7.37   | 217 (100), 147 (55), 156 (54) | C-9                                                                        | D    |      |
| Gallotannin         | Trigalloyl glucopyranose                                                                                                                                           | 60  | 145 | C <sub>27</sub> H <sub>24</sub> O <sub>18</sub>                 | 32.078 | 224, 282             | 635.0890 | 635.0940 | 7.87   | 565 (100), 424 (67)           | BE, GC-1, BC-1, GM-1, GM-3, GM-6, GM-9                                     | D, L | (4)  |
| Galloyl ester       | (3,4,5,6-Tetrahydroxyoxan-2-yl)methyl 3,4,5-trihydroxybenzoate                                                                                                     | 8   | 20  | C <sub>13</sub> H <sub>16</sub> O <sub>10</sub>                 | 10.415 | 196, 226sh, 275      | 331.0671 | 331.0636 | -10.48 | 169 (100), 211 (44), 271 (25) | GC-9, GM-9, BM-9                                                           | D    |      |
|                     | 2,3-Dihydroxypropyl 3,4,5-trihydroxybenzoate                                                                                                                       | 26  | 57  | C <sub>10</sub> H <sub>12</sub> O <sub>7</sub>                  | 17.301 | 212, 270, 308        | 243.0510 | 243.0519 | 3.72   | 107 (100), 106 (20), 71 (20)  | GC-1, BC-1, GC-3, BC-3, GC-6, BC-6, GC-9, BC-9                             | D    |      |
| Hydrolyzable tannin | Strictinin                                                                                                                                                         | 45  | 109 | C <sub>27</sub> H <sub>22</sub> O <sub>18</sub>                 | 25.141 | 196, 222, 288, 326sh | 633.0733 | 633.0790 | 9.00   | 302 (100), 631 (4)            | BE, GC-1, BC-1, GM-1, BM-1, GC-3, BC-3, GM-3, BM-3, GC-6, GM-6, BM-6, GM-9 | D, L | (16) |
| Hydroxycoumarin     | Esculetin                                                                                                                                                          | 66  | 157 | C <sub>9</sub> H <sub>6</sub> O <sub>4</sub>                    | 35.542 | 334                  | 177.0193 | 177.0197 | 2.08   | 109 (100), 91 (96), 152 (39)  | BC-1, BM-1, BC-3, BM-3, BM-6, BC-9                                         | D    |      |
| O-Benzoquinone      | 5,6-Dioxocyclohexa-1,3-diene-1-carboxylic acid                                                                                                                     | 107 | 232 | C <sub>7</sub> H <sub>4</sub> O <sub>4</sub>                    | 55.163 | 192, 262, 300sh      | 151.0037 | 151.0022 | -9.81  | 65 (100), 83 (23), 107 (20)   | GE, BE, BC-1,                                                              | D    |      |

|                                |                                                                                              |    |     |                            |        |                      |          |          |        |                               |                                                                                                                        |   |
|--------------------------------|----------------------------------------------------------------------------------------------|----|-----|----------------------------|--------|----------------------|----------|----------|--------|-------------------------------|------------------------------------------------------------------------------------------------------------------------|---|
| Phenol ether                   | Unknown phenol ether (4-[3-(4-amidinophenoxy)propoxy]benzamidine or other phenol ether type) | 62 | 148 | $C_{21}H_{32}N_4O_{10}S_2$ | 33.214 | 202, 236, 272sh, 336 | 563.1487 | 563.1472 | -2.75  | 504 (100), 387 (83), 147 (76) | GC-3, BC-3, GC-6, GC-9, BC-9, BC-1, GM-1, BM-1, GC-3, BC-3, GM-3, BM-3, GC-6, BC-6, GM-6, BM-6, GC-9, BC-9, GM-9, BM-9 | D |
| Phenolic glycoside             | Turgorin                                                                                     | 21 | 43  | $C_{13}H_{16}O_{13}S$      | 15.458 | 194, 340             | 411.0239 | 411.0237 | -0.45  | 97 (100), 242 (32), 139 (11)  | GC-1, BC-1, GM-1, BM-1, GC-3, BC-3, GM-3, BM-3, GC-6, BC-6, GM-6, BM-6, GC-9, BC-9, GM-9, BM-9                         | D |
| Styrene                        | 4-Vinylphenol                                                                                | 73 | 168 | $C_8H_8O$                  | 38.075 | 230, 313             | 119.0502 | 119.0515 | 10.92  | 119 (100), 93 (6)             | C-1, BC-1, C-6, C-9                                                                                                    | D |
| Tetracenequinone               | Maggiemycin                                                                                  | 97 | 218 | $C_{22}H_{18}O_9$          | 49.699 | 208, 282             | 425.0878 | 425.0829 | -11.54 | 255 (100), 133 (31), 205 (24) | GC-9, GM-9                                                                                                             | D |
| Others: non-phenolic compounds |                                                                                              |    |     |                            |        |                      |          |          |        |                               |                                                                                                                        |   |
| Alpha amino acid               | Pyroglutamic acid                                                                            | 4  | 9   | $C_5H_7NO_3$               | 8.277  | 196, 262             | 128.0353 | 128.0336 | -13.25 | 88 (100)                      | C-1, GC-1, BC-1, GM-1, BM-1, C-3, GC-3, BC-3, GM-3, BM-3, GC-6, BC-6, GM-6, BM-6, C-9, GC-9, BC-9,                     | D |

|                     |                                                          |     |     |                                                               |        |                       |          |          |        |                               |                                                                                                                    |   |
|---------------------|----------------------------------------------------------|-----|-----|---------------------------------------------------------------|--------|-----------------------|----------|----------|--------|-------------------------------|--------------------------------------------------------------------------------------------------------------------|---|
| Beta hydroxy acid   | <i>L</i> -Malic acid                                     | 2   | 3   | C <sub>4</sub> H <sub>6</sub> O <sub>5</sub>                  | 6.849  | 194, 210sh,<br>266    | 133.0142 | 133.0130 | -9.75  | 73 (100), 89 (9)              | GM-9,<br>BM-9<br>BC-1,<br>GM-1,<br>BM-1,<br>GM-3, C-<br>6, GC-6,<br>BC-6,<br>GM-6,<br>BM-6, C-<br>9, GC-9,<br>BC-9 | D |
|                     | 3-Hydroxyglutaric acid                                   | 7   | 15  | C <sub>5</sub> H <sub>8</sub> O <sub>5</sub>                  | 9.797  | 194, 205sh,<br>263    | 147.0299 | 147.0301 | 1.24   | 87 (100)                      | C-1, GC-<br>1, BC-1,<br>C-3, GC-<br>3, BC-3,<br>C-6, GC-<br>6, BC-6,<br>C-9, GC-<br>9, BC-9                        | D |
| Dicarboxylic acid   | Succinic acid                                            | 6   | 13  | C <sub>4</sub> H <sub>6</sub> O <sub>4</sub>                  | 9.325  | 198, 270              | 117.0193 | 117.0169 | -20.70 | 73 (100), 99 (6)              | C-9, GC-<br>9                                                                                                      | D |
| Dipeptide           | gamma-Glutamylleucine                                    | 10  | 23  | C <sub>11</sub> H <sub>20</sub> N <sub>2</sub> O <sub>5</sub> | 11.194 | 194, 280              | 259.1299 | 259.1303 | 1.52   | 215 (100), 171 (39), 102 (24) | C-1, BC-<br>1, C-3,<br>C-9, BC-<br>9                                                                               | D |
|                     | 2-(2-Amino-4-methylpentanamido)-3-methylbutanoic acid 3  | 33  | 72  | C <sub>11</sub> H <sub>22</sub> N <sub>2</sub> O <sub>3</sub> | 20.888 | 194, 222,<br>285, 333 | 229.1558 | 229.1574 | 7.31   | 130 (100), 115 (13)           | C-1, BC-<br>1, C-3,<br>BC-3, C-<br>6, BC-6,<br>C-9, GC-<br>9, BC-9                                                 | D |
|                     | 2-(2-Amino-4-methylpentanamido)-3-phenylpropanoic acid 1 | 61  | 146 | C <sub>15</sub> H <sub>22</sub> N <sub>2</sub> O <sub>3</sub> | 32.412 | 204, 280              | 277.1558 | 277.1543 | -5.29  | 164 (100), 153 (11)           | C-1, BC-<br>1, C-3,<br>C-9, GC-<br>9, BC-9                                                                         | D |
| Estrogen            | Estradiol                                                | 112 | 240 | C <sub>18</sub> H <sub>24</sub> O <sub>2</sub>                | 57.697 | 317                   | 271.1704 | 271.1678 | -9.42  | 209 (100), 128 (71), 84 (47)  | BC-1, C-<br>9, BC-9                                                                                                | D |
| Fatty aldehyde      | Triptophenolide                                          | 127 | 269 | C <sub>20</sub> H <sub>24</sub> O <sub>3</sub>                | 66.239 | 208, 280, 325         | 311.1653 | 311.1671 | 5.89   | 311 (100)                     | C-9, GC-<br>9, BC-9,<br>GM-9,<br>BM-9                                                                              | D |
| Furoic acid         | 2-Furoic acid                                            | 26  | 60  | C <sub>5</sub> H <sub>4</sub> O <sub>3</sub>                  | 17.301 | 250, 308              | 111.0088 | 111.0072 | -14.40 | 111 (100)                     | GC-9,<br>BC-9,<br>BM-9                                                                                             | D |
| Gamma butyrolactone | Parvistemoamide                                          | 47  | 117 | C <sub>12</sub> H <sub>19</sub> NO <sub>4</sub>               | 25.832 | 270, 315              | 240.1241 | 240.1245 | 1.53   | 160 (100), 99 (19)            | C-3, GM-<br>3, C-6,<br>C-9                                                                                         | D |
| Gamma-keto acid     | 4,5-Dioxopentanoic acid                                  | 34  | 75  | C <sub>5</sub> H <sub>6</sub> O <sub>4</sub>                  | 21.375 | 206, 274              | 129.0193 | 129.0190 | -2.57  | 85 (100), 101 (33)            | C-9, GC-<br>9, BC-9                                                                                                | D |
| Gluconolactone      | Gluconolactone                                           | 13  | 30  | C <sub>6</sub> H <sub>10</sub> O <sub>6</sub>                 | 12.689 | 204, 297              | 177.0405 | 177.0405 | 0.44   | 73 (100), 87 (9), 135 (5)     | GC-1,<br>BC-1,<br>BM-1, C-<br>3, BC-3,<br>C-6, GC-<br>6, BC-6,                                                     | D |

|                               |                                                                                            |     |     |                                                               |        |                         |          |          |                   |                                                      |                                                                                                                                    |   |
|-------------------------------|--------------------------------------------------------------------------------------------|-----|-----|---------------------------------------------------------------|--------|-------------------------|----------|----------|-------------------|------------------------------------------------------|------------------------------------------------------------------------------------------------------------------------------------|---|
| Glutamic acid                 | Saccharopine                                                                               | 2   | 4   | C <sub>11</sub> H <sub>20</sub> N <sub>2</sub> O <sub>6</sub> | 6.849  | 194, 210sh,<br>266      | 275.1249 | 275.1202 | -16.79            | 115 (100)                                            | GM-6,<br>BM-6, C-<br>9, GC-9,<br>BC-9<br>C-3, GC-<br>3, BC-3,<br>GM-3                                                              | D |
| Glutamine                     | Theanine                                                                                   | 3   | 6   | C <sub>7</sub> H <sub>14</sub> N <sub>2</sub> O <sub>3</sub>  | 7.270  | 200, 248,<br>280sh      | 173.0932 | 173.0926 | -<br>3.1543<br>71 | 155 (100), 84 (49)                                   | BC-1,<br>GM-1,<br>BM-1,<br>GC-3,<br>BC-3,<br>GM-3,<br>BM-3,<br>GC-6,<br>BC-6,<br>GM-6,<br>BM-6,<br>GC-9,<br>BC-9,<br>GM-9,<br>BM-9 | D |
| Hippuric acid                 | Herdmanine H                                                                               | 36  | 83  | C <sub>13</sub> H <sub>18</sub> N <sub>4</sub> O <sub>4</sub> | 22.002 | 220, 282                | 293.1255 | 293.1253 | -0.64             | 89 (100), 129 (51), 119 (39),<br>175 (23), 188 (16)  | C-9                                                                                                                                | D |
| Histrionicotoxin              | Histrionicotoxin                                                                           | 12  | 26  | C <sub>19</sub> H <sub>25</sub> NO                            | 12.358 | 204, 256                | 282.1863 | 282.1879 | 5.54              | 150 (100)                                            | BM-3,<br>GM-6,<br>BM-6                                                                                                             | D |
| Hydroxy fatty acid            | Mevalonic acid                                                                             | 9   | 22  | C <sub>6</sub> H <sub>12</sub> O <sub>4</sub>                 | 10.823 | 194, 280                | 147.0663 | 147.0645 | -12.12            | 85 (100)                                             | GC-9                                                                                                                               | D |
| Iridoid <i>O</i> -glycoside   | Caryoptosidic acid 1                                                                       | 13  | 29  | C <sub>16</sub> H <sub>24</sub> O <sub>11</sub>               | 12.689 | 208, 327                | 391.1246 | 391.1226 | -5.02             | 243 (100), 242 (87), 168 (34)                        | C-3, BC-<br>3, C-6,<br>BC-6, C-<br>9                                                                                               | D |
|                               | Caryoptosidic acid 2                                                                       | 22  | 47  | C <sub>16</sub> H <sub>24</sub> O <sub>11</sub>               | 15.965 | 264, 338                | 391.1246 | 391.1231 | -3.69             | 277 (100), 242 (81), 263<br>(47), 228 (43), 358 (39) | C-3, BC-<br>3, C-6,<br>C-9                                                                                                         | D |
| Lineolic acid                 | Corchorifatty acid F                                                                       | 122 | 262 | C <sub>18</sub> H <sub>32</sub> O <sub>5</sub>                | 63.212 | 210, 305                | 327.2177 | 327.2167 | -3.05             | 222 (100), 311 (96), 165<br>(89), 209 (64)           | BC-9,<br>BM-9                                                                                                                      | D |
| Long-chain fatty acid         | Myristic acid                                                                              | 29  | 64  | C <sub>14</sub> H <sub>28</sub> O <sub>2</sub>                | 19.574 | 206, 275                | 227.2017 | 227.2007 | -4.20             | 112 (100), 184 (54), 107<br>(49), 159 (35)           | BC-3                                                                                                                               | D |
| Methyl-branched fatty acid    | 3-Methylpent-2-enedioic acid                                                               | 23  | 50  | C <sub>6</sub> H <sub>8</sub> O <sub>4</sub>                  | 16.276 | 195, 205sh,<br>280, 320 | 143.0350 | 143.0350 | 4.74              | 72 (100), 98 (55)                                    | C-1, GC-<br>1, BC-1,<br>C-3, GC-<br>3, BC-3,<br>C-6, GC-<br>6, BC-6,<br>C-9, GC-<br>9, BC-9                                        | D |
| Phenylalanine                 | L-Phenylalanine                                                                            | 20  | 40  | C <sub>9</sub> H <sub>11</sub> NO <sub>2</sub>                | 14.758 | 236, 296                | 164.0717 | 164.0691 | -15.86            | 103 (100), 147 (47), 72 (21)                         | C-9                                                                                                                                | D |
| Purine 2'-deoxyribonucleoside | 9-[4-Hydroxy-5-(hydroxymethyl)oxolan-2-yl]-2-imino-3,9-dihydro-2 <i>H</i> -purine-6,8-diol | 11  | 24  | C <sub>10</sub> H <sub>13</sub> N <sub>5</sub> O <sub>5</sub> | 11.528 | 210, 260                | 282.0844 | 282.0846 | 0.84              | 151 (100), 133 (27)                                  | GM-9,<br>BM-9                                                                                                                      | D |
| Purine nucleoside             | 2-({9-[3,4-dihydroxy-5-(hydroxymethyl)oxolan-                                              | 26  | 58  | C <sub>14</sub> H <sub>17</sub> N <sub>5</sub> O <sub>8</sub> | 17.301 | 196, 266, 328           | 382.1004 | 382.1054 | 12.94             | 74 (100)                                             | C-1, GC-<br>1, BC-1,                                                                                                               | D |

|                    |                                                             |     |     |                                                               |        |                 |          |          |        |                                        |                                                                                                                    |   |
|--------------------|-------------------------------------------------------------|-----|-----|---------------------------------------------------------------|--------|-----------------|----------|----------|--------|----------------------------------------|--------------------------------------------------------------------------------------------------------------------|---|
|                    | 2-yl]-9H-purin-6-yl} amino)butanedioic acid                 |     |     |                                                               |        |                 |          |          |        |                                        | C-3, BC-6, C-9, GC-9, BC-9, BM-9                                                                                   |   |
| Pyranone           | 4-Methoxy-6-(3-phenyloxiran-2-yl)-2H-pyran-2-one            | 5   | 11  | C <sub>14</sub> H <sub>12</sub> O <sub>4</sub>                | 8.902  | 198, 270        | 243.0663 | 243.0623 | -16.51 | 139 (100), 85 (64)                     |                                                                                                                    | D |
| Pyrazine           | 2-(1-Hydroxy-1-methylpropyl)-3-methoxypyrazine              | 123 | 263 | C <sub>9</sub> H <sub>14</sub> N <sub>2</sub> O <sub>2</sub>  | 63.570 | 210, 305        | 181.0983 | 181.0959 | -12.98 | 153 (100), 79 (50)                     | BC-3, GM-3, BM-3                                                                                                   | D |
| Pyrimidone         | 5-Ethyl-5-(4-hydroxypentan-2-yl)-1,3-diazinane-2,4,6-trione | 48  | 121 | C <sub>11</sub> H <sub>18</sub> N <sub>2</sub> O <sub>4</sub> | 26.298 | 258             | 241.1194 | 241.1201 | 2.86   | 130 (100), 168 (66)                    | C-1, C-3, GM-3, C-6, C-9, BC-9                                                                                     | D |
| Pyrrole            | 2-Heptyl-1H-pyrrole                                         | 21  | 44  | C <sub>11</sub> H <sub>19</sub> N                             | 15.458 | 194, 210sh, 289 | 164.1445 | 164.1443 | -1.05  | 120 (100)                              | C-3, C-6                                                                                                           | D |
| Stilbene           | 3,5-Dihydroxy-4-(2,3-epoxy-3-methylbutyl)bibenzyl           | 126 | 268 | C <sub>19</sub> H <sub>22</sub> O <sub>3</sub>                | 65.720 | 208, 280, 325   | 297.1496 | 297.1531 | 11.72  | 297 (100)                              | C-9, GC-9, BC-9, GM-9, BM-9                                                                                        | D |
| Sugar acid         | 1,3-Diethyl 2-hydroxypropanedioate                          | 35  | 80  | C <sub>7</sub> H <sub>12</sub> O <sub>5</sub>                 | 21.850 | 220, 282        | 175.0612 | 175.0622 | 5.67   | 115 (100), 85 (60)                     | C-1, BC-1, GM-1, C-3, GC-3, BC-3, C-6, GC-6, BC-6, C-9, GC-9, BC-9, GM-9                                           | D |
| Terpene glycoside  | Rhodiolide C                                                | 117 | 251 | C <sub>22</sub> H <sub>38</sub> O <sub>12</sub>               | 59.227 | 206, 316        | 493.2291 | 493.2305 | 2.94   | 293 (100), 89 (81), 119 (62), 404 (61) | GM-9                                                                                                               | D |
| Terpene lactone    | Heritol                                                     | 45  | 110 | C <sub>15</sub> H <sub>16</sub> O <sub>3</sub>                | 25.141 | 316             | 243.1027 | 243.1062 | 14.49  | 63 (100), 83 (68)                      | C-6, C-9                                                                                                           | D |
|                    | Amberboin                                                   | 110 | 238 | C <sub>15</sub> H <sub>20</sub> O <sub>4</sub>                | 56.333 | 192, 260        | 263.1289 | 263.1294 | 1.96   | 147 (100), 71 (83)                     | BC-1, BM-6, BC-9, BM-9                                                                                             | D |
| Tricarboxylic acid | Citric acid                                                 | 4   | 7   | C <sub>6</sub> H <sub>8</sub> O <sub>7</sub>                  | 8.277  | 198, 265        | 191.0197 | 191.0201 | 1.85   | 111 (100), 87 (47)                     | C-1, GC-1, BC-1, GM-1, BM-1, C-3, GC-3, BC-3, GM-3, BM-3, C-6, GC-6, BC-6, GM-6, BM-6, C-9, GC-9, BC-9, GM-9, BM-9 | D |
|                    | 3-Hydroxy-3-carboxymethyl-adipic acid                       | 27  | 61  | C <sub>8</sub> H <sub>12</sub> O <sub>7</sub>                 | 18.638 | 212, 272        | 219.0510 | 219.0485 | -11.58 | 112 (100), 95 (19), 155 (13)           | C-9, GC-9, BC-9                                                                                                    | D |
| Tropone            | N-{9-hydroxy-3,4,5,14-tetramethoxy-13-                      | 75  | 172 | C <sub>21</sub> H <sub>23</sub> NO <sub>7</sub>               | 39.040 | 340             | 400.1402 | 400.1398 | -0.94  | 357 (100), 204 (39), 342 (39)          | GC-1, BC-3,                                                                                                        | D |

|                                        |                                                                                                                |     |     |                                                 |        |                 |          |          |        |                                |                                                                                                                            |         |                       |
|----------------------------------------|----------------------------------------------------------------------------------------------------------------|-----|-----|-------------------------------------------------|--------|-----------------|----------|----------|--------|--------------------------------|----------------------------------------------------------------------------------------------------------------------------|---------|-----------------------|
| Tyrosine                               | oxotricyclo[9.5.0.0 <sup>2,7</sup> ]hexadeca-1(16),2(7),3,5,11,14-hexaen-10-yl}formamide<br><i>L</i> -Tyrosine | 7   | 14  | C <sub>9</sub> H <sub>11</sub> NO <sub>3</sub>  | 9.797  | 194, 205sh, 263 | 180.0666 | 180.0644 | -12.42 | 93 (100)                       | GC-9, BC-9, GM-9, BM-9                                                                                                     | D       |                       |
| Vinylogous acid                        | 3,4-Dihydroxy-5-(3-methylbut-2-en-1-yl)-2-(3-methylbutanoyl)cyclopent-2-en-1-one                               | 125 | 267 | C <sub>15</sub> H <sub>22</sub> O <sub>4</sub>  | 65.555 | 208, 280, 325   | 265.1445 | 265.1476 | 11.69  | 265 (100), 97 (42)             | C-9, GC-9, BC-9, BM-9                                                                                                      | D       |                       |
| <i>Positive mode [M+H]<sup>+</sup></i> |                                                                                                                |     |     |                                                 |        |                 |          |          |        |                                |                                                                                                                            |         |                       |
| Phenolic acids                         |                                                                                                                |     |     |                                                 |        |                 |          |          |        |                                |                                                                                                                            |         |                       |
| Hydroxybenzoic acid                    | Gallic acid                                                                                                    | 17  | 37  | C <sub>7</sub> H <sub>6</sub> O <sub>5</sub>    | 14.146 | 218, 274        | 171.0288 | 171.0289 | 0.70   | 79 (100)                       | GE, BE, C-1, GC-1, BC-1, GM-1, BM-1, C-3, GC-3, BC-3, GM-3, BM-3, C-6, GC-6, BC-6, GM-6, BM-6, C-9, GC-9, BC-9, GM-9, BM-9 | S, D, L | (6), (10), (14), (17) |
|                                        | Galloylquinic acid                                                                                             | 18  | 39  | C <sub>14</sub> H <sub>16</sub> O <sub>10</sub> | 14.341 | 216, 276        | 345.0816 | 345.0841 | 7.18   | 154 (100), 155 (18), 111 (13), | GE, BE, GC-1, GM-1, GC-3, BC-3, GM-3, BM-3, GC-6, BC-6, GM-6, BM-6, GC-9, BC-9, GM-9, BM-9                                 | D, L    | (6), (17)             |
|                                        | Syringic acid 1                                                                                                | 37  | 85  | C <sub>9</sub> H <sub>10</sub> O <sub>5</sub>   | 22.193 | 230, 298        | 199.0601 | 199.0602 | 0.70   | 128 (100)                      | BC-1                                                                                                                       | D       |                       |
|                                        | <i>p</i> -Hydroxybenzoic acid                                                                                  | 46  | 113 | C <sub>7</sub> H <sub>6</sub> O <sub>3</sub>    | 25.502 | 204, 226sh, 276 | 139.0390 | 139.0388 | -1.44  | 139 (100), 67 (9)              | GE, BE                                                                                                                     | S, D    |                       |
|                                        | Syringic acid                                                                                                  | 64  | 152 | C <sub>9</sub> H <sub>10</sub> O <sub>5</sub>   | 34.439 | 218, 275        | 199.0601 | 199.0608 | 3.72   | 109 (100), 153 (57), 81 (22)   | C-1, GC-1, BC-1, GM-1,                                                                                                     | S, D    |                       |

|                      |                                                                                  |     |     |                                                                  |        |                    |          |          |        |                                         |                                                                                                                            |         |            |
|----------------------|----------------------------------------------------------------------------------|-----|-----|------------------------------------------------------------------|--------|--------------------|----------|----------|--------|-----------------------------------------|----------------------------------------------------------------------------------------------------------------------------|---------|------------|
|                      |                                                                                  |     |     |                                                                  |        |                    |          |          |        |                                         | BM-1, C-3, GC-3, BC-3, GM-3, BM-3, C-6, GC-6, BC-6, GM-6, BM-6, C-9, GC-9, BC-9, GM-9, BM-9                                |         |            |
| Hydroxycinnamic acid | 3-(4-Hydroxyphenyl)-N-{4-[3-(4-hydroxyphenyl)prop-2-enamido]butyl}prop-2-enamide | 15  | 34  | C <sub>22</sub> H <sub>24</sub> N <sub>2</sub> O <sub>4</sub>    | 13.587 | 194, 282           | 381.1809 | 381.1788 | -5.55  | 381 (100)                               | C-3, GC-3, BC-3, GM-3                                                                                                      | D       |            |
|                      | Glutathionyl caftaric acid                                                       | 27  | 62  | C <sub>23</sub> H <sub>27</sub> N <sub>3</sub> O <sub>15</sub> S | 18.638 | 196, 231, 255, 330 | 618.1236 | 618.1269 | 5.40   | 211 (100), 146 (60), 130 (48), 194 (47) | C-1, GC-1, BC-1, C-3, GC-3, BC-3, C-6, GC-6, BC-6, C-9, GC-9, BC-9                                                         | D, L    | (14), (17) |
|                      | Feruloylagmatine 1                                                               | 38  | 90  | C <sub>15</sub> H <sub>22</sub> N <sub>4</sub> O <sub>3</sub>    | 22.477 | 212, 234sh, 274    | 307.1765 | 307.1724 | -13.24 | 139 (100), 163 (7)                      | GC-3, GM-3, GC-6, GM-9                                                                                                     | D       |            |
|                      | Feruloylagmatine 2                                                               | 44  | 107 | C <sub>15</sub> H <sub>22</sub> N <sub>4</sub> O <sub>3</sub>    | 24.894 | 194, 238, 272      | 307.1765 | 307.1723 | -13.58 | 140 (100), 181 (69)                     | GC-3, GM-3                                                                                                                 | D       |            |
|                      | Chlorogenic acid                                                                 | 44  | 108 | C <sub>16</sub> H <sub>18</sub> O <sub>9</sub>                   | 24.894 | 242, 327           | 355.1024 | 355.1056 | 9.01   | 164 (100), 145 (65), 135 (11)           | GE, BE, C-1, GC-1, BC-1, GM-1, BM-1, C-3, GC-3, BC-3, GM-3, BM-3, C-6, GC-6, BC-6, GM-6, BM-6, C-9, GC-9, BC-9, GM-9, BM-9 | S, D, L | (6), (10)  |
|                      | Grandidentoside                                                                  | 45  | 111 | C <sub>21</sub> H <sub>28</sub> O <sub>10</sub>                  | 25.141 | 203, 232, 280      | 441.1755 | 441.1736 | -4.41  | 441 (100)                               | BE                                                                                                                         | D       |            |
|                      | Subaphyllin                                                                      | 48  | 122 | C <sub>14</sub> H <sub>20</sub> N <sub>2</sub> O <sub>3</sub>    | 26.298 | 246, 356           | 265.1547 | 265.1550 | 1.47   | 120 (100)                               | C-1, GM-3, C-9, GC-9, BC-9                                                                                                 | D       |            |
|                      | 3,4-Dimethoxycinnamic acid                                                       | 120 | 259 | C <sub>11</sub> H <sub>12</sub> O <sub>4</sub>                   | 60.747 | 224, 327           | 209.0808 | 209.0817 | 4.14   | 135 (100), 117 (91), 89 (32)            | C-1, GC-1, BC-1,                                                                                                           | D, L    | (14)       |



|                             |                                                          |     |     |                                                               |        |               |          |          |        |                                                   |                                                                                                                            |         |                |
|-----------------------------|----------------------------------------------------------|-----|-----|---------------------------------------------------------------|--------|---------------|----------|----------|--------|---------------------------------------------------|----------------------------------------------------------------------------------------------------------------------------|---------|----------------|
| Hydroxyphenylpropanoic acid | 2-(2-Amino-4-methylpentanamido)-3-phenylpropanoic acid 1 | 61  | 146 | C <sub>15</sub> H <sub>22</sub> N <sub>2</sub> O <sub>3</sub> | 32.412 | 204, 280      | 279.1703 | 279.1714 | 3.94   | 83 (100)                                          | C-3, GC-3, BC-3, C-6, GC-6, BC-6 C-1, BC-1, C-3, C-9, GC-9, BC-9                                                           | D       |                |
|                             | 2-(2-Amino-4-methylpentanamido)-3-phenylpropanoic acid 2 | 65  | 153 | C <sub>15</sub> H <sub>22</sub> N <sub>2</sub> O <sub>3</sub> | 35.315 | 208, 281      | 279.1703 | 279.1648 | -19.70 | 86 (100), 120 (14)                                | C-9                                                                                                                        | D       |                |
| Flavonoids                  |                                                          |     |     |                                                               |        |               |          |          |        |                                                   |                                                                                                                            |         |                |
| Dihydrochalcone             | 2',6'-Dihydroxy-4'-methoxy-3'-methylidihydrochalcone     | 111 | 239 | C <sub>17</sub> H <sub>18</sub> O <sub>4</sub>                | 56.810 | 228, 270      | 287.1278 | 287.1256 | -7.61  | 287 (100), 187 (19)                               | C-1, GC-1, BC-1, BC-3                                                                                                      | D       |                |
| Flavan-3-ol                 | Theasinensin C 1                                         | 24  | 51  | C <sub>30</sub> H <sub>26</sub> O <sub>14</sub>               | 16.471 | 206, 275      | 611.1395 | 611.1475 | 12.97  | 317 (100), 425 (58), 308 (35), 275 (30)           | GM-1, GM-3, GM-6                                                                                                           | D, L    | (4)            |
|                             | Gallocatechin                                            | 28  | 63  | C <sub>15</sub> H <sub>14</sub> O <sub>7</sub>                | 19.054 | 200, 216, 273 | 307.0812 | 307.0834 | 7.07   | 139 (100), 195 (7)                                | GE, BE, C-1, GC-1, BC-1, GM-1, BM-1, C-3, GC-3, BC-3, GM-3, BM-3, C-6, GC-6, BC-6, GM-6, BM-6, C-9, GC-9, BC-9, GM-9, BM-9 | S, D, L | (2), (6), (17) |
|                             | Theasinensin C 3                                         | 32  | 70  | C <sub>30</sub> H <sub>26</sub> O <sub>14</sub>               | 20.509 | 206, 276      | 611.1395 | 611.1446 | 8.35   | 69 (100), 251 (66), 203 (63), 270 (31)            | GC-1, GM-1, GC-3, GM-3, GC-6, GM-6                                                                                         | D, L    |                |
|                             | Theasinensin B 1                                         | 37  | 84  | C <sub>37</sub> H <sub>30</sub> O <sub>18</sub>               | 22.193 | 230, 298      | 763.1505 | 763.1641 | 17.82  | 275 (100), 449 (63), 283 (58), 409 (25), 261 (20) | BE, BC-1, GM-1, BM-1, BC-3, GM-3, BM-3, BC-6, GM-6, BM-6                                                                   | D, L    | (4)            |
|                             | Leucodelphinidin                                         | 37  | 87  | C <sub>15</sub> H <sub>14</sub> O <sub>8</sub>                | 22.193 | 214, 250, 270 | 323.0761 | 323.0775 | 4.23   | 161 (100)                                         | GM-1                                                                                                                       | D       |                |
|                             | Epigallocatechin                                         | 40  | 97  | C <sub>15</sub> H <sub>14</sub> O <sub>7</sub>                | 23.385 | 196, 236, 272 | 307.0800 | 307.0843 | 14.00  | 163 (100), 140 (67), 205 (13)                     | GE, BE, C-1, GC-1, BC-1, GM-1,                                                                                             | S, D, L | (2), (17)      |

|                                            |    |     |                                                 |        |                 |          |          |       |                                         |                                                                                                                                                                                  |         |                |
|--------------------------------------------|----|-----|-------------------------------------------------|--------|-----------------|----------|----------|-------|-----------------------------------------|----------------------------------------------------------------------------------------------------------------------------------------------------------------------------------|---------|----------------|
| Theasinensin B 2                           | 43 | 104 | C <sub>37</sub> H <sub>30</sub> O <sub>18</sub> | 24.428 | 212, 276        | 763.1505 | 763.1583 | 10.22 | 277 (100), 425 (87), 139 (76), 577 (27) | BM-1, C-3, GC-3, BC-3, GM-3, BM-3, C-6, GC-6, BC-6, GM-6, BM-6, C-9, GC-9, BC-9, GM-9, BM-9<br>GE, BE, GC-1, GM-1, GC-3, GM-3, GC-6, GM-6, GC-9, GM-9                            | D, L    | (4)            |
| Catechin                                   | 46 | 112 | C <sub>15</sub> H <sub>14</sub> O <sub>6</sub>  | 25.502 | 206, 224sh, 285 | 291.0900 | 291.0871 | -9.96 | 123 (100), 111 (20)                     | GE, BE, C-1, GC-1, BC-1, GM-1, BM-1, C-3, GC-3, BC-3, GM-3, BM-3, C-6, GC-6, BC-6, GM-6, BM-6, C-9, GC-9, BC-9, GM-9, BM-9<br>BE, GC-1, GM-1, GC-3, GM-3, GC-6, GM-6, GC-9, GM-9 | S, D, L | (4), (6), (14) |
| (Epi)gallocatechin-(epi)catechin gallate 1 | 51 | 127 | C <sub>37</sub> H <sub>30</sub> O <sub>17</sub> | 27.305 | 208, 281        | 747.1556 | 747.1642 | 11.51 | 139 (100), 290 (47), 595 (40), 275 (38) | BE, GC-1, GM-1, GC-3, GM-3, GC-6, GM-6, GC-9, GM-9                                                                                                                               | D, L    | (9)            |
| Theasinensin A                             | 52 | 128 | C <sub>44</sub> H <sub>34</sub> O <sub>22</sub> | 27.498 | 210, 282        | 915.1614 | 915.1708 | 10.27 | 288 (100), 575 (18), 449 (14)           | GE, BE, GC-1, BC-1, BM-1, GC-3, BC-3, BM-3                                                                                                                                       | D, L    | (4)            |
| (Epi)gallocatechin-(epi)catechin gallate 2 | 54 | 131 | C <sub>37</sub> H <sub>30</sub> O <sub>17</sub> | 28.239 | 204, 280        | 747.1556 | 747.1641 | 11.38 | 123 (100), 273 (17), 315 (10)           | GC-1, GM-1                                                                                                                                                                       | D, L    | (9)            |

|                            |    |     |                                                 |        |               |          |          |       |                               |                                                                                                                                                                                                                                     |         |                   |
|----------------------------|----|-----|-------------------------------------------------|--------|---------------|----------|----------|-------|-------------------------------|-------------------------------------------------------------------------------------------------------------------------------------------------------------------------------------------------------------------------------------|---------|-------------------|
| Epicatechin                | 56 | 135 | C <sub>15</sub> H <sub>14</sub> O <sub>6</sub>  | 29.502 | 216, 276      | 291.0863 | 291.0895 | 10.94 | 147 (100), 165 (83), 140 (54) | GC-3,<br>GM-3,<br>GC-6,<br>GM-6,<br>GC-9,<br>GM-9<br>GE, BE,<br>C-1, GC-<br>1, BC-1,<br>GM-1,<br>BM-1, C-<br>3, GC-3,<br>BC-3,<br>GM-3,<br>BM-3, C-<br>6, GC-6,<br>BC-6,<br>GM-6,<br>BM-6, C-<br>9, GC-9,<br>BC-9,<br>GM-9,<br>BM-9 | S, D, L | (4), (6),<br>(14) |
| Epigallocatechin gallate   | 58 | 137 | C <sub>22</sub> H <sub>18</sub> O <sub>11</sub> | 30.555 | 196, 232, 276 | 459.0922 | 459.0983 | 13.29 | 139 (100), 151 (14), 289 (9)  | GE, BE,<br>C-1, GC-<br>1, BC-1,<br>GM-1,<br>BM-1, C-<br>3, GC-3,<br>BC-3,<br>GM-3,<br>BM-3, C-<br>6, GC-6,<br>BC-6,<br>GM-6,<br>BM-6,<br>GC-9,<br>GM-9,<br>BM-9                                                                     | S, D, L | (4), (6)          |
| Galocatechin gallate dimer | 58 | 140 | C <sub>44</sub> H <sub>36</sub> O <sub>22</sub> | 30.555 | 196, 232, 276 | 917.1771 | 917.1899 | 13.96 | 153 (100), 140 (78), 271 (28) | GC-1,<br>GM-1,<br>GC-3,<br>GM-3,<br>GC-6,<br>GM-6                                                                                                                                                                                   | D, L    | (7)               |
| Galocatechin gallate       | 63 | 149 | C <sub>22</sub> H <sub>18</sub> O <sub>11</sub> | 33.413 | 210, 275, 334 | 459.0900 | 459.0976 | 16.55 | 140 (100), 120 (31), 247 (25) | GE, BE,<br>C-1, GC-<br>1, BC-1,<br>GM-1,<br>BM-1, C-<br>3, GC-3,<br>BC-3,<br>GM-3,<br>BM-3, C-<br>6, GC-6,<br>BC-6,<br>GM-6,                                                                                                        | S, D    |                   |

|                                                                                                                 |    |     |                                                  |        |                 |          |          |       |                                         |                                                                                                                 |         |               |
|-----------------------------------------------------------------------------------------------------------------|----|-----|--------------------------------------------------|--------|-----------------|----------|----------|-------|-----------------------------------------|-----------------------------------------------------------------------------------------------------------------|---------|---------------|
| (Epi)catechin gallate dimer                                                                                     | 76 | 174 | C <sub>44</sub> H <sub>36</sub> O <sub>20</sub>  | 39.622 | 196, 232, 280   | 885.1873 | 885.2010 | 15.51 | 257 (100)                               | BM-6, GM-9, GE, BE, GC-1, BC-1, GM-1, GC-3, BC-3, GM-3, GC-6, GM-6                                              | D, L    | (20)          |
| Epicatechin gallate                                                                                             | 76 | 176 | C <sub>22</sub> H <sub>18</sub> O <sub>10</sub>  | 39.622 | 196, 232, 280   | 443.0973 | 443.1032 | 13.32 | 153 (100), 165 (51), 140 (35), 124 (30) | GE, BE, C-1, GC-1, BC-1, GM-1, BM-1, C-3, GC-3, BC-3, GM-3, BM-3, C-6, GC-6, BC-6, GM-6, BM-6, GC-9, GM-9, BM-9 | S, D, L | (2), (6), (9) |
| Epicatechin gallate 1                                                                                           | 79 | 182 | C <sub>22</sub> H <sub>18</sub> O <sub>10</sub>  | 41.522 | 208, 276        | 443.0973 | 443.1013 | 9.09  | 123 (100)                               | GE, GC-1, GM-1, GC-3, GM-3, GC-6, GM-6                                                                          | D, L    | (2), (6), (9) |
| 2,3-Dihydroxy-5-(3,5,7-trihydroxy-4-oxo-3,4-dihydro-2H-1-benzopyran-2-yl)phenyl 3,4-dihydroxy-5-methoxybenzoate | 81 | 191 | C <sub>23</sub> H <sub>18</sub> O <sub>12</sub>  | 42.668 | 210, 258, 357   | 487.0871 | 487.0903 | 6.57  | 325 (100)                               | BE, GC-1, BC-1, GM-1, BM-1, BC-3                                                                                | D       |               |
| Epicatechin 3-O-gallate and dehydroascorbic acid conjugate                                                      | 88 | 199 | C <sub>28</sub> H <sub>24</sub> O <sub>16</sub>  | 46.074 | 198, 268, 348   | 617.1137 | 617.1548 | 66.60 | 550 (100)                               | GE, BE, GC-1, BC-1, GM-1, BM-1, GC-3                                                                            | D, L    | (23)          |
| Methyl epicatechin gallate                                                                                      | 90 | 204 | C <sub>23</sub> H <sub>20</sub> O <sub>10</sub>  | 46.533 | 194, 280        | 457.1129 | 457.1130 | 0.17  | 123 (100)                               | GE, BE, GM-1, GC-3, GM-3                                                                                        | D, L    | (2)           |
| Epiafzelechin 3-gallate                                                                                         | 92 | 209 | C <sub>22</sub> H <sub>18</sub> O <sub>9</sub>   | 47.594 | 194, 206sh, 275 | 427.1024 | 427.1068 | 10.40 | 257 (100), 140 (94), 109 (42)           | GE, BE, GC-1, GM-1, GC-3, GM-3                                                                                  | D, L    | (11)          |
| C-8 N-ethyl-2-                                                                                                  | 94 | 211 | C <sub>28</sub> H <sub>27</sub> NO <sub>11</sub> | 48.399 | 194, 210, 280   | 554.1657 | 554.1710 | 9.56  | 384 (100), 217 (18)                     | GE, GC-                                                                                                         | D, L    | (12)          |

|                       |                                                                                                        |     |     |                                                 |        |                         |          |          |        |                                                                   |                                                                                                                                      |           |
|-----------------------|--------------------------------------------------------------------------------------------------------|-----|-----|-------------------------------------------------|--------|-------------------------|----------|----------|--------|-------------------------------------------------------------------|--------------------------------------------------------------------------------------------------------------------------------------|-----------|
|                       | pyrrolidinone-substituted<br>(-)-epicatechin-3- <i>O</i> -<br>gallate                                  |     |     |                                                 |        |                         |          |          |        | 1, GC-9,<br>GM-9                                                  |                                                                                                                                      |           |
|                       | Epigallocatechin gallate-<br>4',4''- <i>O</i> -β-D-gluco-<br>pyranoside                                | 98  | 219 | C <sub>34</sub> H <sub>38</sub> O <sub>21</sub> | 50.154 | 248, 364                | 783.1978 | 783.2441 | 59.07  | 189 (100), 111 (40), 329 (19)                                     | GE, GC-<br>1, GM-1                                                                                                                   | D, L (22) |
|                       | Theaflavate B                                                                                          | 107 | 233 | C <sub>36</sub> H <sub>28</sub> O <sub>15</sub> | 55.163 | 326                     | 701.1501 | 701.5045 | 505.46 | 701 (100)                                                         | GE, BE,<br>GC-1,<br>BC-1, C-<br>3, GC-3,<br>BC-3                                                                                     | D, L (19) |
|                       | Theaflavin                                                                                             | 115 | 247 | C <sub>29</sub> H <sub>24</sub> O <sub>12</sub> | 58.863 | 210, 268,<br>298, 365sh | 565.1341 | 565.1412 | 12.65  | 139 (100)                                                         | GE, BE,<br>BC-1,<br>BC-3                                                                                                             | D, L (6)  |
|                       | Theaflavin 3-gallate                                                                                   | 118 | 255 | C <sub>36</sub> H <sub>28</sub> O <sub>16</sub> | 59.832 | 210, 270                | 717.1450 | 717.1531 | 11.29  | 151 (100), 379 (84), 229<br>(42), 367 (38), 241 (31), 111<br>(30) | GE, BE,<br>BC-1,<br>BC-3                                                                                                             | D, L (6)  |
|                       | Theaflavin-3,3'-gallate                                                                                | 119 | 257 | C <sub>43</sub> H <sub>32</sub> O <sub>20</sub> | 60.230 | 208, 277, 378           | 869.1560 | 869.1664 | 12.00  | 391 (100), 153 (98), 333<br>(45), 593 (42), 441 (13)              | GE, BE,<br>BC-1,<br>BC-3                                                                                                             | D, L (6)  |
| Flavanonol<br>Flavone | Katuranin 1                                                                                            | 58  | 139 | C <sub>15</sub> H <sub>12</sub> O <sub>6</sub>  | 30.555 | 212, 275                | 289.0707 | 289.0707 | -0.05  | 139 (100), 151 (14)                                               | GE, BE                                                                                                                               | D         |
|                       | Apigenin 6,8-di- <i>C</i> -<br>glucoside                                                               | 55  | 132 | C <sub>27</sub> H <sub>30</sub> O <sub>15</sub> | 29.077 | 272, 352                | 595.1657 | 595.1745 | 14.71  | 559 (100), 439 (85), 421<br>(57), 294 (31)                        | BE, BC-<br>1, GM-1,<br>BM-1,<br>GC-3,<br>BC-3,<br>GM-3,<br>BM-3,<br>BC-6,<br>GM-6,<br>BM-6                                           | D, L (4)  |
|                       | Apigenin 7- <i>O</i> -apiosyl-<br>glucoside                                                            | 63  | 150 | C <sub>26</sub> H <sub>28</sub> O <sub>14</sub> | 33.413 | 208, 270, 338           | 565.1552 | 565.1553 | 0.16   | 565 (100), 547 (100), 529<br>(82), 427 (78), 511 (56)             | GE, BE,<br>GC-9,<br>BC-9,<br>GM-9,<br>BM-9                                                                                           | D         |
| Flavonol              | 3,5,7-Trihydroxy-2-(3-<br>hydroxy-4-<br>methoxyphenyl)-6,8-<br>dimethoxy-4 <i>H</i> -chromen-<br>4-one | 47  | 116 | C <sub>18</sub> H <sub>16</sub> O <sub>9</sub>  | 25.832 | 194, 222,<br>286, 320sh | 377.0867 | 377.0897 | 7.93   | 377 (100)                                                         | GM-1,<br>GM-3                                                                                                                        | D         |
|                       | Quercetin 3- <i>O</i> -di-<br>galactoside/galucoside                                                   | 65  | 154 | C <sub>27</sub> H <sub>30</sub> O <sub>17</sub> | 35.315 | 208, 281                | 627.1556 | 627.1631 | 12.00  | 319 (100), 320 (24)                                               | GE, BE,<br>C-1, GC-<br>1, BC-1,<br>GM-1,<br>BM-1, C-<br>3, GC-3,<br>BC-3,<br>GM-3,<br>BM-3, C-<br>6, GC-6,<br>BC-6,<br>GM-6,<br>BM-6 | D, L (5)  |
|                       | Myricetin-3- <i>O</i> -<br>galactoside 1                                                               | 68  | 159 | C <sub>21</sub> H <sub>20</sub> O <sub>13</sub> | 36.379 | 212, 270, 350           | 481.0977 | 481.1023 | 9.63   | 320 (100)                                                         | GE, C-1,<br>GC-1,                                                                                                                    | D, L (10) |

|                                             |    |     |                                                 |        |               |          |          |       |                               |                                                                                                                                                                                                                          |      |          |
|---------------------------------------------|----|-----|-------------------------------------------------|--------|---------------|----------|----------|-------|-------------------------------|--------------------------------------------------------------------------------------------------------------------------------------------------------------------------------------------------------------------------|------|----------|
| Myricetin-3- <i>O</i> -galactoside 2        | 69 | 160 | C <sub>21</sub> H <sub>20</sub> O <sub>13</sub> | 36.799 | 210, 264, 360 | 481.0977 | 481.1036 | 12.33 | 320 (100), 97 (15)            | BC-1, GM-1, BM-1, C-3, GC-3, BC-3, GM-3, BM-3, C-6, GC-6, BC-6, GM-6, BM-6, GE, BE, GC-1, BC-1, GM-1, BM-1, GC-3, BC-3, GM-3, GC-6, GM-6, GE, BE, BC-1, BM-1, GC-3, BC-3, GM-3, BM-3, BC-6, BM-6, GC-1, GM-1, GC-9, GM-9 | D, L | (10)     |
| Quercetin 3- <i>O</i> -glucosylrutinoside 1 | 70 | 161 | C <sub>33</sub> H <sub>40</sub> O <sub>21</sub> | 37.066 | 206, 268, 350 | 773.2135 | 773.2271 | 17.61 | 304 (100), 449 (12)           | BC-1, BM-1, GC-3, BC-3, GM-3, BM-3, BC-6, BM-6, GC-1, GM-1, GC-9, GM-9, GE, BE, GC-1, BC-1, GM-1, BM-1, BC-3, BM-3, GC-6, GM-6, GC-9, GM-9, BM-9                                                                         | D, L | (4), (9) |
| Myricetin                                   | 71 | 162 | C <sub>15</sub> H <sub>10</sub> O <sub>8</sub>  | 37.156 | 210, 264, 360 | 319.0448 | 319.0481 | 10.34 | 319 (100)                     | GC-1, GM-1, GC-9, GM-9                                                                                                                                                                                                   | D    |          |
| Kaempferol 3- <i>O</i> -rutinoside 1        | 72 | 164 | C <sub>27</sub> H <sub>30</sub> O <sub>15</sub> | 37.274 | 216, 271, 347 | 595.1658 | 595.1732 | 12.43 | 433 (100), 379 (16), 283 (12) | GE, BE, GC-1, BC-1, GM-1, BM-1, BC-3, BM-3, GC-6, GM-6, GC-9, GM-9, BM-9                                                                                                                                                 | D, L | (6)      |
| Quercetin 3- <i>O</i> -glucosylrutinoside 2 | 73 | 167 | C <sub>33</sub> H <sub>40</sub> O <sub>21</sub> | 38.075 | 208, 260, 360 | 773.2135 | 773.2219 | 10.88 | 303 (100)                     | GE, BE, GC-1, BC-1, GM-1, BM-1, BC-3, BM-3, GC-6, BM-6, GC-9,                                                                                                                                                            | D, L | (4), (9) |

|                                                                      |    |     |                                                 |        |               |          |          |        |                              |                                                                                                                       |         |          |
|----------------------------------------------------------------------|----|-----|-------------------------------------------------|--------|---------------|----------|----------|--------|------------------------------|-----------------------------------------------------------------------------------------------------------------------|---------|----------|
| Quercetin-3- <i>O</i> -glucoside 1                                   | 76 | 175 | C <sub>21</sub> H <sub>20</sub> O <sub>12</sub> | 39.622 | 345           | 465.1028 | 465.0879 | -32.02 | 303 (100)                    | BC-9, GM-9, BM-9, BC-1, BM-1, BC-3, BM-3, BM-6                                                                        | D, L    | (9)      |
| Rutin                                                                | 77 | 178 | C <sub>27</sub> H <sub>30</sub> O <sub>16</sub> | 40.518 | 204, 258, 357 | 611.1610 | 611.1676 | 10.80  | 304 (100)                    | GE, BE, C-1, GC-1, BC-1, GM-1, BM-1, C-3, GC-3, BC-3, GM-3, BM-3, C-6, GC-6, BC-6, GM-6, BM-6, GC-9, BC-9, GM-9, BM-9 | S, D, L | (2), (4) |
| Myricetin-galloyl-hexoside 1                                         | 77 | 179 | C <sub>28</sub> H <sub>24</sub> O <sub>17</sub> | 40.518 | 202, 256, 354 | 633.1086 | 633.1430 | 54.31  | 633 (100)                    | GE                                                                                                                    | D, L    | (16)     |
| Myricetin-galloyl-hexoside 2                                         | 79 | 185 | C <sub>28</sub> H <sub>24</sub> O <sub>17</sub> | 41.522 | 208, 258, 356 | 633.1086 | 633.1578 | 77.64  | 633 (100), 331 (2)           | BE                                                                                                                    | D, L    | (16)     |
| Quercetin-3- <i>O</i> -glucoside 2                                   | 80 | 186 | C <sub>21</sub> H <sub>20</sub> O <sub>12</sub> | 42.306 | 208, 258, 356 | 465.1028 | 465.1061 | 7.22   | 304 (100), 127 (20)          | GE, BE, GC-1, GM-1, GC-3, GM-3, GC-6, BC-6, GM-6                                                                      | D, L    | (9)      |
| Kaempferol 3- <i>O</i> -glucosylrhamnosyl-galactoside 2              | 80 | 187 | C <sub>33</sub> H <sub>40</sub> O <sub>20</sub> | 42.306 | 198, 268, 349 | 757.2186 | 757.2331 | 19.19  | 288 (100), 449 (79), 217 (6) | GE, BE, BC-1, GM-1, BM-1, GC-3, BC-3, GM-3, BM-3, BC-6, BM-6, BC-9, BM-9                                              | D       |          |
| Kaempferol 1                                                         | 80 | 188 | C <sub>15</sub> H <sub>10</sub> O <sub>6</sub>  | 42.306 | 198, 268, 349 | 287.0550 | 287.0601 | 17.77  | 122 (100)                    | BE, BC-1, BC-3, BC-6, BM-6                                                                                            | D, L    | (5)      |
| Quercetin 3- <i>O</i> -[(2,4-diacetyl- $\alpha$ -L-rhamnopyranosyl)- | 80 | 189 | C <sub>35</sub> H <sub>38</sub> O <sub>20</sub> | 42.306 | 198, 268, 349 | 779.2029 | 779.2159 | 16.68  | 493 (100)                    | BE, BC-1, GM-1, BM-1                                                                                                  | D       |          |

|                                                                             |    |     |                                                 |        |               |          |          |       |                               |                                                                                                                 |         |           |
|-----------------------------------------------------------------------------|----|-----|-------------------------------------------------|--------|---------------|----------|----------|-------|-------------------------------|-----------------------------------------------------------------------------------------------------------------|---------|-----------|
| (1→6)]-3,4-diacetyl-beta-D-galactopyranoside 1<br>Quercetin 3-O-galactoside | 82 | 192 | C <sub>21</sub> H <sub>20</sub> O <sub>12</sub> | 42.886 | 208, 258, 357 | 465.1028 | 465.1080 | 11.28 | 303 (100)                     | GE, BE, C-1, GC-1, BC-1, GM-1, BM-1, C-3, GC-3, BC-3, GM-3, BM-3, C-6, GC-6, BC-6, GM-6, BM-6, GC-9, BC-9, GM-9 | S, D, L | (6), (17) |
| Kaempferol 3-O-rutinoside 2                                                 | 83 | 193 | C <sub>27</sub> H <sub>30</sub> O <sub>15</sub> | 43.739 | 206, 254, 342 | 595.1657 | 595.1694 | 6.14  | 288 (100), 449 (39), 147 (18) | GE, BE, C-1, GC-1, BC-1, GM-1, BM-1, C-3, GC-3, BC-3, GM-3, BM-3, C-6, GC-6, BC-6, GM-6, BM-6                   | D, L    | (6)       |
| Kaempferol 3-O-rutinoside 3                                                 | 87 | 198 | C <sub>27</sub> H <sub>30</sub> O <sub>15</sub> | 45.751 | 198, 268, 349 | 595.1657 | 595.1726 | 11.59 | 287 (100), 288 (18)           | GE, BE, GC-1, BC-1, GM-1, BM-1, GC-3, BC-3, GM-3, BM-3, GC-6, GM-6, GC-9, BC-9, GM-9, BM-9                      | D, L    | (6)       |
| Kaempferol 2                                                                | 88 | 200 | C <sub>15</sub> H <sub>10</sub> O <sub>6</sub>  | 46.074 | 196, 266, 348 | 287.0550 | 287.0551 | 0.10  | 287 (100)                     | GE, BE, BC-9, BM-9                                                                                              | D, L    | (5)       |
| Kaempferol 3-O-glucoside 1                                                  | 89 | 201 | C <sub>21</sub> H <sub>20</sub> O <sub>11</sub> | 46.401 | 194, 280      | 449.1078 | 449.1139 | 13.50 | 91 (100)                      | GE, BE, BC-1, BC-3, GC-6, BC-6, BM-6                                                                            | D, L    | (9)       |



|                                     |     |     |                                                 |        |               |          |          |        |                                         |                                                                                                                 |         |     |
|-------------------------------------|-----|-----|-------------------------------------------------|--------|---------------|----------|----------|--------|-----------------------------------------|-----------------------------------------------------------------------------------------------------------------|---------|-----|
| Kaempferol 3- <i>O</i> -glucoside 2 | 93  | 210 | C <sub>21</sub> H <sub>20</sub> O <sub>11</sub> | 47.827 | 280           | 449.1078 | 449.0938 | -31.17 | 288 (100), 127 (15)                     | BE, GM-1                                                                                                        | D       |     |
| Kaempferol 3- <i>O</i> -glucoside   | 94  | 212 | C <sub>21</sub> H <sub>20</sub> O <sub>11</sub> | 48.399 | 198, 266, 350 | 449.1078 | 449.1132 | 11.94  | 288 (100), 85 (14), 127 (11)            | GE, BE, C-1, GC-1, BC-1, GM-1, BM-1, C-3, GC-3, BC-3, GM-3, BM-3, C-6, GC-6, BC-6, GM-6, BM-6, GC-9, BC-9       | S, D, L | (9) |
| Kaempferol 3                        | 95  | 215 | C <sub>15</sub> H <sub>10</sub> O <sub>6</sub>  | 48.707 | 198, 268, 348 | 287.0550 | 287.0574 | 8.36   | 153 (100)                               | GC-1, BC-1, GM-1, BM-1, GC-6, BC-6, GM-6, BM-6, GC-9, BC-9, GM-9, BM-9                                          | D, L    | (5) |
| Unknown quercetin conjugate 1       | 113 | 241 | C <sub>42</sub> H <sub>46</sub> O <sub>22</sub> | 58.117 | 210, 270, 318 | 903.2554 | 903.2670 | 12.90  | 147 (100), 303 (27), 309 (24), 291 (13) | GE, BE, C-1, GC-1, BC-1, GM-1, BM-1, C-3, GC-3, BC-3, GM-3, BM-3, C-6, GC-6, BC-6, GM-6, BM-6, GC-9, BC-9, GM-9 | D, L    | (6) |
| Unknown kaempferol conjugate        | 115 | 248 | C <sub>42</sub> H <sub>46</sub> O <sub>21</sub> | 58.863 | 212, 270, 315 | 887.2604 | 887.2701 | 10.89  | 147 (100), 85 (13)                      | GE, BE, C-1, GC-1, BC-1, GM-1, BM-1, C-3, GC-3, BC-3, GM-3, BM-3, C-6, GC-6, BC-6                               | D, L    | (6) |

|                                   |                                                                                                                                                                                                                          |     |     |                                                 |        |               |          |          |        |                                                  |                                                                              |         |      |
|-----------------------------------|--------------------------------------------------------------------------------------------------------------------------------------------------------------------------------------------------------------------------|-----|-----|-------------------------------------------------|--------|---------------|----------|----------|--------|--------------------------------------------------|------------------------------------------------------------------------------|---------|------|
|                                   | Quercetin 3- <i>O</i> -[(2,4-diacetyl- $\alpha$ -L-rhamnopyranosyl)-(1 $\rightarrow$ 6)]-3,4-diacetyl-beta-D-galactopyranoside 2                                                                                         | 117 | 253 | C <sub>35</sub> H <sub>38</sub> O <sub>20</sub> | 59.227 | 210, 316      | 779.2029 | 779.1913 | -14.89 | 779 (100)                                        | GM-6, BM-6, GM-1                                                             | D       |      |
|                                   | Quercetin                                                                                                                                                                                                                | 121 | 261 | C <sub>15</sub> H <sub>10</sub> O <sub>7</sub>  | 61.100 | 206, 258, 374 | 303.0499 | 303.0524 | 8.25   | 247 (100), 177 (57)                              | GE, BE, GC-1, GM-1, BM-1, GC-3, GM-3, BM-3, GC-6, GM-6, BM-6, GC-9, GM-9     | S, D, L | (17) |
|                                   | Kaempferol                                                                                                                                                                                                               | 124 | 266 | C <sub>15</sub> H <sub>10</sub> O <sub>6</sub>  | 63.686 | 228, 370      | 287.0550 | 287.0575 | 8.71   | 165 (100)                                        | GE, BE, GC-1, GM-1, GC-3, GM-3, GM-6, GC-9, GM-9, BM-9                       | S, D, L | (5)  |
| Hydroxyflavonoid                  | 3,5,7-Tris(acetyloxy)-2-[4-(acetyloxy)-3-hydroxyphenyl]-4 <i>H</i> -1-benzopyran-4-one 1                                                                                                                                 | 91  | 207 | C <sub>23</sub> H <sub>18</sub> O <sub>11</sub> | 46.86  | 194, 210, 280 | 471.0922 | 471.0938 | 3.40   | 471 (100)                                        | BE, GC-1, BC-1, GM-1, BC-3                                                   | D       |      |
|                                   | 3,5,7-Tris(acetyloxy)-2-[4-(acetyloxy)-3-hydroxyphenyl]-4 <i>H</i> -1-benzopyran-4-one 2                                                                                                                                 | 95  | 214 | C <sub>23</sub> H <sub>18</sub> O <sub>11</sub> | 48.707 | 198, 268, 348 | 471.0922 | 471.0955 | 7.00   | 309 (100)                                        | BE, GC-1, BC-1, GM-1, BM-1                                                   | D       |      |
| Isoflavonoid                      | 3-Oxo-3-[[3,4,5-trihydroxy-6-(3-hydroxy-14-methoxy-8,17-dioxatetracyclo[8.7.0.0 <sup>2</sup> ,7 <sup>0</sup> ,11 <sup>1</sup> ,6 <sup>6</sup> ]heptadeca-2,4,6,11,13,15-hexaen-5-yl]oxy)oxan-2-yl]methoxy}propanoic acid | 75  | 173 | C <sub>25</sub> H <sub>26</sub> O <sub>13</sub> | 39.040 | 220, 274, 338 | 535.1446 | 535.1539 | 17.35  | 517 (100), 481 (87), 379 (64), 427 (43)          | BC-1, GM-1, BM-1, GC-3, BC-3, GM-3, BM-3, BC-6, BM-6, GC-9, BC-9, GM-9, BM-9 | D       |      |
| <i>O</i> -Methylated flavonoid    | Centaureidin                                                                                                                                                                                                             | 42  | 101 | C <sub>18</sub> H <sub>16</sub> O <sub>8</sub>  | 24.075 | 312           | 361.0918 | 361.0929 | 3.05   | 361 (100), 169 (58)                              | GE, GC-1, BC-1                                                               | D       |      |
|                                   | Sideritiflavone                                                                                                                                                                                                          | 43  | 105 | C <sub>18</sub> H <sub>16</sub> O <sub>8</sub>  | 24.428 | 206, 273      | 361.0918 | 361.0890 | -7.85  | 361 (100), 147 (58), 187 (20), 321 (14)          | BE                                                                           | D       |      |
| <i>O</i> -Methylated isoflavonoid | 2,5,7-Trihydroxy-3-(4-methoxyphenyl)-3,4-                                                                                                                                                                                | 73  | 165 | C <sub>16</sub> H <sub>14</sub> O <sub>6</sub>  | 38.075 | 206, 258, 356 | 303.0863 | 303.0833 | -9.95  | 91 (100), 120 (69), 175 (51), 153 (21), 221 (16) | BC-6, BM-6                                                                   | D       |      |

|                  |                                                          |    |     |                                                 |        |                    |          |          |       |                                            |                                                                                                                       |         |      |
|------------------|----------------------------------------------------------|----|-----|-------------------------------------------------|--------|--------------------|----------|----------|-------|--------------------------------------------|-----------------------------------------------------------------------------------------------------------------------|---------|------|
| Proanthocyanidin | dihydro-2 <i>H</i> -1-benzopyran-4-one<br>Procyanidin B3 | 38 | 89  | C <sub>30</sub> H <sub>26</sub> O <sub>12</sub> | 22.477 | 204, 213sh,<br>282 | 579.1497 | 579.1566 | 11.91 | 123 (100), 233 (33), 259<br>(26), 151 (22) | C-1, GC-1, BC-1, GM-1, C-3, GC-3, BC-3, GM-3, GM-6, GC-9, GM-9                                                        | D, L    | (17) |
|                  | Procyanidin B1                                           | 49 | 123 | C <sub>30</sub> H <sub>26</sub> O <sub>12</sub> | 26.435 | 204, 282           | 579.1497 | 579.1566 | 11.91 | 123 (100), 233 (33), 259<br>(26), 151 (22) | GE, BE, GC-1, BC-1, GM-1, BM-1, C-3, GC-3, BC-3, GM-3, BM-3, C-6, GC-6, BC-6, GM-6, BM-6, C-9, GC-9, BC-9, GM-9, BM-9 | S, D, L | (17) |
|                  | Procyanidin B2                                           | 50 | 124 | C <sub>30</sub> H <sub>26</sub> O <sub>12</sub> | 27.127 | 204, 325           | 579.1497 | 579.1558 | 10.53 | 139 (100), 123 (52), 283<br>(28), 275 (28) | GE, BE, C-1, GC-1, BC-1, GM-1, BM-1, C-3, GC-3, BC-3, GM-3, BM-3, C-6, GC-6, BC-6, GM-6, BM-6                         | S, D, L | (17) |
|                  | Procyanidin B1 3- <i>O</i> -gallate                      | 59 | 142 | C <sub>37</sub> H <sub>30</sub> O <sub>16</sub> | 31.447 | 208, 282, 310      | 731.1607 | 731.1704 | 13.27 | 127 (100), 139 (46), 275 (44)              | GE, BE, C-1, GC-1, BC-1, GM-1, BM-1, C-3, GC-3, BC-3, GM-3, BM-3, C-6, GC-6, BC-6, GM-6, BM-6                         | D       |      |
|                  | Procyanidin B2 3- <i>O</i> -gallate                      | 61 | 147 | C <sub>37</sub> H <sub>30</sub> O <sub>16</sub> | 32.412 | 204, 280           | 731.1607 | 731.1704 | 13.27 | 127 (100), 139 (46), 275 (44)              | GC-1, BC-1,                                                                                                           | D       |      |

|                            |                                                                                           |     |     |                                                                               |        |                      |          |          |        |                                         |                                            |   |
|----------------------------|-------------------------------------------------------------------------------------------|-----|-----|-------------------------------------------------------------------------------|--------|----------------------|----------|----------|--------|-----------------------------------------|--------------------------------------------|---|
|                            | Procyanidin dimer-trimethylglyoxal adduct 1                                               | 71  | 163 | C <sub>39</sub> H <sub>38</sub> O <sub>18</sub>                               | 37.156 | 208, 268, 350        | 795.2131 | 795.2084 | -5.91  | 732 (100)                               | GM-1, BC-3, GM-3, GC-6, BE, BC-1           | D |
|                            | Procyanidin dimer-trimethylglyoxal adduct 2                                               | 73  | 166 | C <sub>39</sub> H <sub>38</sub> O <sub>18</sub>                               | 38.075 | 206, 258, 355        | 795.2131 | 795.2098 | -4.15  | 493 (100), 389 (51)                     | BE, BC-1, BM-1                             | D |
|                            | Procyanidin dimer-trimethylglyoxal adduct 3                                               | 74  | 169 | C <sub>39</sub> H <sub>38</sub> O <sub>18</sub>                               | 38.451 | 208, 258, 350        | 795.2131 | 795.2040 | -11.44 | 582 (100)                               | GC-1, GM-1                                 | D |
| Others: phenolic compounds |                                                                                           |     |     |                                                                               |        |                      |          |          |        |                                         |                                            |   |
| Benzenediol                | 2-(3,4-Dihydroxyphenyl)-3,5,7-trihydroxy-4a,8a-dihydro-4 <i>H</i> -chromen-4-one          | 79  | 183 | C <sub>15</sub> H <sub>12</sub> O <sub>7</sub>                                | 41.522 | 205, 290             | 305.0656 | 305.0667 | 3.67   | 123 (100), 111 (66), 141 (33)           | C-1, C-6                                   | D |
| Benzoyl derivative         | 1-Phenylprop-2-yn-1-one                                                                   | 38  | 88  | C <sub>9</sub> H <sub>6</sub> O                                               | 22.477 | 204, 213sh, 282      | 131.0491 | 131.0468 | -17.79 | 104 (100), 78 (56)                      | 4GM-9                                      | D |
| Coumarin                   | Coumarin                                                                                  | 42  | 102 | C <sub>9</sub> H <sub>6</sub> O <sub>2</sub>                                  | 24.075 | 248, 340             | 147.0441 | 147.0442 | 0.68   | 65 (100), 105 (30)                      | GE, BE, GC-1, BC-1, GM-6, BM-6, GM-9, BM-9 | D |
|                            | Trichoderamide A                                                                          | 78  | 181 | C <sub>20</sub> H <sub>20</sub> N <sub>2</sub> O <sub>9</sub>                 | 41.340 | 208, 282             | 433.1242 | 433.1201 | -9.37  | 281 (100)                               | GM-1, GM-9                                 | D |
| Coumarin glycoside         | 3,4,5-Trihydroxy-6-[(8-hydroxy-2-oxo-2 <i>H</i> -chromen-7-yl)oxy]oxane-2-carboxylic acid | 14  | 31  | C <sub>15</sub> H <sub>14</sub> O <sub>10</sub>                               | 13.046 | 204, 222, 300        | 355.0660 | 355.0678 | 5.17   | 355 (100), 185 (9)                      | GM-1                                       | D |
| Hydrolyzable tannin        | Unknown hydrolyzable tannin (gomisin R or gomisin type)                                   | 79  | 184 | C <sub>22</sub> H <sub>24</sub> O <sub>7</sub>                                | 41.522 | 204, 268, 354        | 401.1595 | 401.1573 | -5.53  | 401 (100)                               | BE                                         | D |
| Hydroxycoumarin            | Skimmetin 1                                                                               | 32  | 71  | C <sub>9</sub> H <sub>6</sub> O <sub>3</sub>                                  | 20.509 | 206, 276             | 163.0390 | 163.0390 | 0.00   | 77 (100)                                | GC-1, GM-1, GM-9                           | D |
|                            | Skimmetin 2                                                                               | 46  | 114 | C <sub>9</sub> H <sub>6</sub> O <sub>3</sub>                                  | 25.502 | 194, 222, 287, 328   | 163.0390 | 163.0395 | 3.07   | 77 (100), 107 (16)                      | C-1, GM-1, GM-3, GM-6, GM-9                | D |
|                            | Skimmetin 3                                                                               | 121 | 260 | C <sub>9</sub> H <sub>6</sub> O <sub>3</sub>                                  | 61.100 | 224, 328             | 163.0390 | 163.0381 | -5.52  | 77 (100)                                | C-1, BC-1, C-3                             | D |
| Naphthol                   | Solistatinol                                                                              | 129 | 272 | C <sub>18</sub> H <sub>20</sub> O <sub>4</sub>                                | 67.839 | 200, 232, 278        | 301.1434 | 301.1421 | -4.37  | 301 (100), 116 (64)                     | C-1, GC-1, BC-1, GM-1, BM-1                | D |
| Phenol ether               | Unknown phenol ether (4-[3-(4-amidinophenoxy)propoxy]benzamidine or other                 | 62  | 148 | C <sub>21</sub> H <sub>32</sub> N <sub>4</sub> O <sub>10</sub> S <sub>2</sub> | 33.214 | 202, 236, 272sh, 336 | 565.1633 | 565.1626 | -1.17  | 529 (100), 499 (59), 391 (50), 475 (30) | BC-1, GM-1, BM-1, GC-3,                    | D |

| phenol ether type)             |                                      |     |     |                                                               |        |                      |          |          |        |                                                   |                                                                                                               | BC-3,<br>GM-3,<br>BM-3,<br>GC-6,<br>BC-6,<br>GM-6,<br>BM-6,<br>GC-9,<br>BC-9,<br>GM-9,<br>BM-9 |  |
|--------------------------------|--------------------------------------|-----|-----|---------------------------------------------------------------|--------|----------------------|----------|----------|--------|---------------------------------------------------|---------------------------------------------------------------------------------------------------------------|------------------------------------------------------------------------------------------------|--|
| Phenolic glycoside             | Platensimycin B4 methyl ester        | 35  | 79  | C <sub>31</sub> H <sub>39</sub> NO <sub>12</sub>              | 21.850 | 198, 218sh, 257, 331 | 618.2545 | 618.2560 | 2.42   | 193 (100), 146 (95), 208 (74), 369 (37), 471 (15) | C-3, GC-3, BC-3                                                                                               | D                                                                                              |  |
| Pyranoxanthone                 | Unknown pyranoxanthone               | 102 | 224 | C <sub>23</sub> H <sub>22</sub> O <sub>9</sub> S              | 51.259 | 206, 236, 316        | 475.1057 | 475.1050 | -1.53  | 313 (100)                                         | GC-1, GM-1                                                                                                    | D                                                                                              |  |
| Others: non-phenolic compounds |                                      |     |     |                                                               |        |                      |          |          |        |                                                   |                                                                                                               |                                                                                                |  |
| Alkaloid                       | Pilosine                             | 91  | 206 | C <sub>16</sub> H <sub>18</sub> N <sub>2</sub> O <sub>3</sub> | 46.860 | 208, 268, 349        | 287.1390 | 287.1424 | 11.88  | 165 (100)                                         | GC-3, BC-3, GM-3, BC-6                                                                                        | D                                                                                              |  |
| Alkyl-phenylketone             | <i>O</i> -Acetylaniline              | 8   | 19  | C <sub>8</sub> H <sub>9</sub> NO                              | 10.415 | 196, 226sh, 275      | 136.0757 | 136.0752 | -3.53  | 92 (100), 107 (96)                                | C-1, GC-1, BC-1, BC-6                                                                                         | D                                                                                              |  |
| Alpha amino acid               | Pyroglutamic acid                    | 4   | 9   | C <sub>5</sub> H <sub>7</sub> NO <sub>3</sub>                 | 8.277  | 196, 262             | 130.0499 | 130.0501 | 1.61   | 84 (100)                                          | C-1, GC-1, BC-1, GM-1, BM-1, C-3, GC-3, BC-3, GM-3, BM-3, GC-6, BC-6, GM-6, BM-6, C-9, GC-9, BC-9, GM-9, BM-9 | D                                                                                              |  |
|                                | Dichotocejpipin B                    | 35  | 78  | C <sub>15</sub> H <sub>16</sub> N <sub>2</sub> O <sub>5</sub> | 21.850 | 296                  | 305.1132 | 305.1142 | 3.28   | 84 (100), 86 (34), 139 (25), 215 (17)             | GM-1                                                                                                          | D                                                                                              |  |
|                                | 2-Amino-6-octanamidoheptanoic acid 1 | 103 | 227 | C <sub>14</sub> H <sub>28</sub> N <sub>2</sub> O <sub>3</sub> | 52.494 | 195, 280, 330        | 273.2173 | 273.2196 | 8.53   | 87 (100)                                          | GC-1, BC-1, C-3, GC-3, BC-3, C-6, GC-6, BC-6, C-9, GC-9                                                       | D                                                                                              |  |
|                                | 2-Amino-6-octanamidoheptanoic acid 2 | 105 | 230 | C <sub>14</sub> H <sub>28</sub> N <sub>2</sub> O <sub>3</sub> | 54.283 | 214, 330             | 273.2173 | 273.2190 | 6.34   | 86 (100), 160 (23)                                | GC-1, BC-1, C-3, C-6, C-9, BC-9                                                                               | D                                                                                              |  |
| Alpha-hydrogen aldehyde        | 4-Acetamidobutanal                   | 13  | 28  | C <sub>6</sub> H <sub>11</sub> NO <sub>2</sub>                | 12.689 | 208, 327             | 130.0863 | 130.0841 | -16.95 | 85 (100), 115 (9)                                 | BC-9, GM-9, BM-9                                                                                              | D                                                                                              |  |

|                         |                                                                           |    |     |                                                                              |        |                      |          |          |        |                                         |                                                  |   |
|-------------------------|---------------------------------------------------------------------------|----|-----|------------------------------------------------------------------------------|--------|----------------------|----------|----------|--------|-----------------------------------------|--------------------------------------------------|---|
| Aminobenzenesulfonamide | Sulfisoxazole                                                             | 8  | 18  | C <sub>11</sub> H <sub>13</sub> N <sub>3</sub> O <sub>3</sub> S              | 10.415 | 196, 226sh, 275      | 268.0750 | 268.0737 | -4.88  | 136 (100)                               | GM-9                                             | D |
| Aminobenzoic acid       | 2-Aminobenzoic acid                                                       | 3  | 5   | C <sub>7</sub> H <sub>7</sub> NO <sub>2</sub>                                | 7.270  | 200, 248, 280sh      | 138.0550 | 138.0547 | -1.85  | 138 (100), 94 (36)                      | C-1, C-6, BC-6, C-9, BC-9                        | D |
| Aryl alkyl ketone       | 1-(Pyrazin-2-yl)ethan-1-one                                               | 7  | 16  | C <sub>6</sub> H <sub>6</sub> N <sub>2</sub> O                               | 9.797  | 192, 205sh, 262      | 123.0553 | 123.0561 | 6.35   | 81 (100), 108 (33)                      | GM-1, GM-6, GM-9                                 | D |
| Biguanide               | Buformin 1                                                                | 20 | 42  | C <sub>6</sub> H <sub>15</sub> N <sub>5</sub>                                | 14.758 | 198, 266             | 158.1400 | 158.1433 | 20.73  | 72 (100), 84 (38), 130 (17), 102 (12)   | GC-3                                             | D |
| Biguanide               | 1-Carbamimidamido-N,N-dimethylmethanimidamide                             | 22 | 48  | C <sub>4</sub> H <sub>11</sub> N <sub>5</sub>                                | 15.965 | 264, 338             | 130.1087 | 130.1051 | -28.07 | 84 (100)                                | C-3, GC-3, BC-3, GM-3, BM-3                      | D |
| Biguanide               | Buformin 2                                                                | 47 | 120 | C <sub>6</sub> H <sub>15</sub> N <sub>5</sub>                                | 25.832 | 223, 246, 329        | 158.1400 | 158.1439 | 24.27  | 84 (100)                                | BC-3, GM-3                                       | D |
| Butenolide              | Dihydrotetrodecamycin                                                     | 4  | 8   | C <sub>18</sub> H <sub>24</sub> O <sub>6</sub>                               | 8.277  | 196, 267             | 337.1646 | 337.1673 | 8.11   | 253 (100), 301 (36), 111 (20)           | BM-1, BC-6, BC-9                                 | D |
| Cyclic peptide          | Patellamide C 1                                                           | 41 | 99  | C <sub>37</sub> H <sub>46</sub> N <sub>8</sub> O <sub>6</sub> S <sub>2</sub> | 23.825 | 211, 280             | 763.3054 | 763.3088 | 4.39   | 163 (100), 275 (32), 151 (19), 257 (15) | BM-3                                             | D |
|                         | Patellamide C 2                                                           | 47 | 115 | C <sub>37</sub> H <sub>46</sub> N <sub>8</sub> O <sub>6</sub> S <sub>2</sub> | 25.832 | 216, 280             | 763.3054 | 763.3067 | 1.64   | 287 (100), 306 (42), 595 (15)           | GC-3, GM-3                                       | D |
| Cycloheptathiophene     | Ketotifen                                                                 | 15 | 33  | C <sub>19</sub> H <sub>19</sub> NOS                                          | 13.587 | 194, 282             | 310.1260 | 310.1232 | -9.16  | 84 (100), 70 (57)                       | BC-9, BM-9                                       | D |
| Dihydrofuran            | Phaeofuran B 1                                                            | 37 | 86  | C <sub>12</sub> H <sub>18</sub> O <sub>5</sub>                               | 22.193 | 194, 280, 330        | 243.1227 | 243.1262 | 14.23  | 86 (100), 84 (29)                       | C-3, GC-3, BC-3                                  | D |
|                         | Phaeofuran B 2                                                            | 39 | 93  | C <sub>12</sub> H <sub>18</sub> O <sub>5</sub>                               | 22.905 | 200, 284             | 243.1227 | 243.1256 | 12.05  | 120 (100)                               | C-3, GC-3                                        | D |
| Dipeptide               | gamma-Glutamylleucine                                                     | 10 | 23  | C <sub>11</sub> H <sub>20</sub> N <sub>2</sub> O <sub>5</sub>                | 11.194 | 194, 280             | 261.1445 | 261.1474 | 11.23  | 130 (100)                               | C-1, BC-1, C-3                                   | D |
| Dipeptide               | 2-(2-Amino-4-methylpentanamido)-3-methylbutanoic acid 1                   | 23 | 49  | C <sub>11</sub> H <sub>22</sub> N <sub>2</sub> O <sub>3</sub>                | 16.276 | 195, 205sh, 280, 320 | 231.1703 | 231.1666 | -15.91 | 69 (100), 87 (77)                       | C-9, GC-9, BC-9                                  | D |
|                         | 2-(2-Amino-4-methylpentanamido)-3-methylbutanoic acid 2                   | 26 | 59  | C <sub>11</sub> H <sub>22</sub> N <sub>2</sub> O <sub>3</sub>                | 17.301 | 195, 205sh, 280, 320 | 231.1703 | 231.1674 | -12.50 | 86 (100)                                | C-9, GC-9, BC-9                                  | D |
|                         | 2-(2-Amino-4-methylpentanamido)-3-methylbutanoic acid 3                   | 33 | 72  | C <sub>11</sub> H <sub>22</sub> N <sub>2</sub> O <sub>3</sub>                | 20.888 | 192, 220, 280, 332   | 231.1703 | 231.1709 | 2.64   | 73 (100)                                | C-1, BC-1, C-3, BC-3, C-6, BC-6, C-9, GC-9, BC-9 | D |
|                         | 2-[(2-Amino-1-hydroxy-3-methylpentylidene)amino]-4-methylpentanoic acid 1 | 39 | 91  | C <sub>12</sub> H <sub>24</sub> N <sub>2</sub> O <sub>3</sub>                | 22.905 | 196, 220, 282        | 245.1860 | 245.1816 | -17.70 | 86 (100), 69 (10)                       | C-1, BC-1, C-3, GM-3, GC-9, BC-9                 | D |
|                         | 1-(2-Amino-3-phenylpropanoyl)pyrrolidine-2-carboxylic acid                | 40 | 95  | C <sub>14</sub> H <sub>18</sub> N <sub>2</sub> O <sub>3</sub>                | 23.385 | 216, 260, 293sh      | 263.1390 | 263.1343 | -17.93 | 70 (100)                                | BC-9                                             | D |
|                         | 2-[(2-Amino-1-hydroxy-3-methylpentylidene)amino]-4-methylpentanoic acid   | 47 | 119 | C <sub>12</sub> H <sub>24</sub> N <sub>2</sub> O <sub>3</sub>                | 25.832 | 192, 214, 320        | 245.1860 | 245.1869 | 3.63   | 87 (100)                                | C-1, BC-1, C-3, GM-3, C-9, BC-9                  | D |

|                     |                                                                           |     |     |                                                               |        |                 |          |          |        |                                        |                                                           |   |
|---------------------|---------------------------------------------------------------------------|-----|-----|---------------------------------------------------------------|--------|-----------------|----------|----------|--------|----------------------------------------|-----------------------------------------------------------|---|
|                     | acid 2                                                                    |     |     |                                                               |        |                 |          |          |        |                                        |                                                           |   |
|                     | 2-(2-Amino-4-methylpentanamido)-3-methylbutanoic acid 4                   | 50  | 126 | C <sub>11</sub> H <sub>22</sub> N <sub>2</sub> O <sub>3</sub> | 27.127 | 204, 325        | 231.1703 | 231.1705 | 0.61   | 86 (100)                               | C-1, BC-1, C-6, C-9                                       | D |
|                     | 2-[(2-Amino-1-hydroxy-3-methylpentylidene)amino]-4-methylpentanoic acid 3 | 53  | 130 | C <sub>12</sub> H <sub>24</sub> N <sub>2</sub> O <sub>3</sub> | 27.791 | 220, 242, 328   | 245.1860 | 245.1866 | 2.37   | 86 (100)                               | C-1, BC-1, C-3, BC-3                                      | D |
|                     | 2-[(2-Amino-1-hydroxy-3-methylpentylidene)amino]-4-methylpentanoic acid 4 | 63  | 151 | C <sub>12</sub> H <sub>24</sub> N <sub>2</sub> O <sub>3</sub> | 33.413 | 208, 270, 338   | 245.1860 | 245.1808 | -21.12 | 72 (100), 146 (12)                     | C-9                                                       | D |
| Diphenylmethane     | Darifenacin                                                               | 123 | 264 | C <sub>28</sub> H <sub>30</sub> N <sub>2</sub> O <sub>2</sub> | 63.570 | 209, 270, 370   | 427.2380 | 427.2379 | -0.25  | 427 (100)                              | GM-1                                                      | D |
| Enoate ester        | Stagonolide H                                                             | 117 | 252 | C <sub>10</sub> H <sub>12</sub> O <sub>4</sub>                | 59.227 | 206, 316        | 197.0808 | 197.0784 | -12.36 | 99 (100), 83 (80)                      | C-1, GC-1, BC-1, C-3, BC-3                                | D |
| Fatty acid ester    | Phomester C                                                               | 78  | 180 | C <sub>19</sub> H <sub>35</sub> NO <sub>5</sub>               | 41.340 | 208, 282        | 358.2588 | 358.2635 | 13.12  | 86 (100)                               | C-9                                                       | D |
| Gamma butyrolactone | N,N-Dimethyl-5-oxoxolane-2-carboxamide                                    | 36  | 82  | C <sub>7</sub> H <sub>11</sub> NO <sub>3</sub>                | 22.002 | 220, 282        | 158.0812 | 158.0782 | -18.79 | 85 (100)                               | C-9, GC-9, BC-9                                           | D |
| Glutamine           | Theanine                                                                  | 3   | 6   | C <sub>7</sub> H <sub>14</sub> N <sub>2</sub> O <sub>3</sub>  | 7.270  | 200, 248, 280sh | 175.1077 | 175.1047 | -17.47 | 84 (100), 158 (49), 130 (8)            | GC-9, BC-9, GM-9, BM-9                                    | D |
| Guanidine           | 3-Guanidino-N-(2-hydroxyheptyl)propionamide                               | 50  | 125 | C <sub>11</sub> H <sub>24</sub> N <sub>4</sub> O <sub>2</sub> | 27.127 | 238, 330        | 245.1972 | 245.1956 | -6.54  | 91 (100), 87 (76)                      | C-6, BC-6, C-9, GC-9, BC-9                                | D |
| Indole              | <i>trans</i> -3-Indoleacrylic acid                                        | 39  | 92  | C <sub>11</sub> H <sub>9</sub> NO <sub>2</sub>                | 22.905 | 196, 220, 282   | 188.0706 | 188.0707 | 0.53   | 144 (100), 119 (34), 147 (34), 91 (21) | C-1, GC-1, BC-1, GM-1, BM-1, GM-6, BM-6, GC-9, GM-9, BM-9 | D |
| Indoline            | 2,3-Dihydro-1 <i>H</i> -indole 1                                          | 20  | 41  | C <sub>8</sub> H <sub>9</sub> N                               | 14.758 | 236, 296        | 120.0808 | 120.0879 | 59.13  | 77 (100)                               | C-6, GC-6, BC-6, C-9, GC-9, BC-9, GM-9, BM-9              | D |
|                     | 2,3-Dihydro-1 <i>H</i> -indole 2                                          | 21  | 45  | C <sub>8</sub> H <sub>9</sub> N                               | 15.458 | 194, 212sh, 290 | 120.0808 | 120.0806 | -1.47  | 77 (100), 103 (13)                     | C-1, GC-1, BC-1, GM-1, BM-1                               | D |
|                     | 2,3-Dihydro-1 <i>H</i> -indole 3                                          | 60  | 144 | C <sub>8</sub> H <sub>9</sub> N                               | 32.078 | 194, 266        | 120.0808 | 120.0810 | 1.67   | 93 (100), 104 (89)                     | C-1, BC-1, C-9                                            | D |

|                 |                                                           |     |     |                                                               |        |                         |          |          |        |                                                                       |                                                                                |         |          |
|-----------------|-----------------------------------------------------------|-----|-----|---------------------------------------------------------------|--------|-------------------------|----------|----------|--------|-----------------------------------------------------------------------|--------------------------------------------------------------------------------|---------|----------|
| Indolizidine    | Isoelaecarpiline                                          | 7   | 17  | C <sub>16</sub> H <sub>21</sub> NO <sub>2</sub>               | 9.797  | 200, 264                | 260.1645 | 260.1636 | -3.48  | 86 (100), 132 (9)                                                     | C-1, GC-1                                                                      | D       |          |
| Isoleucine      | <i>L</i> -Isoleucine 1                                    | 5   | 10  | C <sub>6</sub> H <sub>13</sub> NO <sub>2</sub>                | 8.902  | 198, 270                | 132.1019 | 132.0996 | -17.30 | 70 (100)                                                              | GC-9, BC-9                                                                     |         |          |
|                 | <i>L</i> -Isoleucine 2                                    | 6   | 12  | C <sub>6</sub> H <sub>13</sub> NO <sub>2</sub>                | 9.325  | 198, 270                | 132.1019 | 132.1000 | -14.34 | 91 (100)                                                              | GC-9, BC-9                                                                     |         |          |
| Macrolactam     | Cespitulactam D                                           | 33  | 73  | C <sub>20</sub> H <sub>29</sub> NO <sub>2</sub>               | 20.888 | 194, 365                | 316.2271 | 316.2254 | -5.49  | 187 (100)                                                             | C-1, GC-1, BC-1                                                                | D       |          |
| Morpholine      | 4-Amino-2-[(morpholin-4-yl)methyl]oxolan-3-ol             | 22  | 46  | C <sub>9</sub> H <sub>18</sub> N <sub>2</sub> O <sub>3</sub>  | 15.965 | 264, 338                | 203.1390 | 203.1357 | -16.34 | 86 (100), 132 (26)                                                    | C-9, GC-9, BC-9                                                                | D       |          |
| Morpholine      | Ciclosidomine                                             | 25  | 53  | C <sub>13</sub> H <sub>20</sub> N <sub>4</sub> O <sub>3</sub> | 17.180 | 198, 268                | 281.1608 | 281.1576 | -11.48 | 84 (100)                                                              | C-6, GC-6, BC-6, C-9                                                           | D       |          |
| Naphthopyran    | Inumakilactone A                                          | 40  | 96  | C <sub>18</sub> H <sub>20</sub> O <sub>8</sub>                | 23.385 | 216, 260, 293sh         | 365.1231 | 365.1244 | 3.56   | 334 (100)                                                             | GE, BE, GC-1, BC-1, GM-1, BM-1                                                 | D       |          |
| Oxasteroid      | Wortmannin                                                | 92  | 208 | C <sub>23</sub> H <sub>24</sub> O <sub>8</sub>                | 47.594 | 194, 210, 280           | 429.1544 | 429.1568 | 5.61   | 235 (100), 181 (44)                                                   | GC-1                                                                           | D       |          |
| Peptide         | Methyl 2-(2-amino-4-methylpentanamido)-3-phenylpropanoate | 100 | 221 | C <sub>16</sub> H <sub>24</sub> N <sub>2</sub> O <sub>3</sub> | 50.678 | 224, 280                | 293.1860 | 293.1865 | 1.81   | 103 (100), 147 (87)                                                   | C-1, GC-1, C-6, C-9                                                            | D       |          |
| Physalin        | Physalin D                                                | 84  | 195 | C <sub>28</sub> H <sub>32</sub> O <sub>11</sub>               | 44.325 | 202, 218, 266, 302, 348 | 545.2017 | 545.2050 | 6.05   | 375 (100)                                                             | GC-1, BC-1, GM-1                                                               | D       |          |
| Proline         | Proline betaine                                           | 9   | 21  | C <sub>7</sub> H <sub>13</sub> NO <sub>2</sub>                | 10.823 | 194, 280                | 144.1019 | 144.0998 | -14.54 | 71 (100)                                                              | C-9, GC-9, BC-9                                                                | D       |          |
| Purine alkaloid | Theophyllin                                               | 26  | 56  | C <sub>7</sub> H <sub>8</sub> N <sub>4</sub> O <sub>2</sub>   | 17.301 | 206, 275                | 181.0720 | 181.0759 | 21.36  | 138 (100), 181 (76), 110 (56), 163 (36), 135 (23), 139 (22), 108 (21) | BE                                                                             | D, L    | (1)      |
|                 | Theobromine                                               | 31  | 69  | C <sub>7</sub> H <sub>8</sub> N <sub>4</sub> O <sub>2</sub>   | 20.153 | 204, 274                | 181.0720 | 181.0724 | 2.21   | 138 (100), 110 (30)                                                   | GE, BE, GC-1, BC-1, GM-1, BM-1, GC-6, BC-6, GM-6, BM-6, GC-9, BC-9, GM-9, BM-9 | D       |          |
|                 | Caffeine                                                  | 57  | 136 | C <sub>8</sub> H <sub>10</sub> N <sub>4</sub> O <sub>2</sub>  | 29.773 | 216, 276                | 195.0877 | 195.0898 | 10.76  | 138 (100), 139 (9)                                                    | GE, BE, GC-1, BC-1, GM-1, BM-1, GC-3, BC-3, GM-3, BM-3, GC-6,                  | S, D, L | (6), (9) |



|                    |                                                                                                          |     |     |                                                               |        |                    |          |          |        |                                                  |                                                      |   |
|--------------------|----------------------------------------------------------------------------------------------------------|-----|-----|---------------------------------------------------------------|--------|--------------------|----------|----------|--------|--------------------------------------------------|------------------------------------------------------|---|
| Purine nucleoside  | Adenosine                                                                                                | 11  | 25  | C <sub>10</sub> H <sub>13</sub> N <sub>5</sub> O <sub>4</sub> | 11.528 | 210, 260           | 268.1040 | 268.1081 | 15.26  | 136 (100)                                        | BC-6, GM-6, BM-6, GC-9, BC-9, GM-9, BM-9, GM-1, GM-6 | D |
| Purine nucleoside  | 2-( <i>9</i> -[3,4-Dihydroxy-5-(hydroxymethyl)oxolan-2-yl]-9 <i>H</i> -purin-6-yl}amino)butanedioic acid | 26  | 58  | C <sub>14</sub> H <sub>17</sub> N <sub>5</sub> O <sub>8</sub> | 17.301 | 202, 212, 270, 329 | 384.1150 | 384.1165 | 3.91   | 253 (100), 234 (22)                              | C-1, GC-1, BC-1, C-3, BC-6, C-9, GC-9, BC-9          | D |
| Pyrrroloindole     | Physostigmine                                                                                            | 26  | 55  | C <sub>15</sub> H <sub>21</sub> N <sub>3</sub> O <sub>2</sub> | 17.301 | 206, 275           | 276.1707 | 276.1667 | -14.48 | 231 (100), 260 (96), 175 (83), 91 (47), 112 (46) | C-9, GC-9, BC-9                                      | D |
| Sesquiterpenoid    | Debromolaurinterol                                                                                       | 12  | 27  | C <sub>15</sub> H <sub>20</sub> O                             | 12.358 | 212, 294, 328      | 217.1587 | 217.1613 | 11.87  | 165 (100), 86 (89), 147 (75)                     | C-6, GC-6, BC-6, C-9, GC-9, BC-9                     | D |
| Sugar alcohol      | Ribitol                                                                                                  | 30  | 67  | C <sub>5</sub> H <sub>12</sub> O <sub>5</sub>                 | 20.024 | 216, 277           | 153.0758 | 153.0796 | 25.15  | 153 (100), 80 (14), 123 (12)                     | GC-3, BC-3, GM-3                                     | D |
| Terpene glycoside  | Monomelittoside                                                                                          | 14  | 32  | C <sub>15</sub> H <sub>22</sub> O <sub>10</sub>               | 13.046 | 206, 220sh, 302    | 363.1286 | 363.1293 | 2.00   | 231 (100), 156 (26)                              | GC-1, BC-1                                           | D |
| Tricarboxylic acid | Cryptoporic acid B                                                                                       | 110 | 237 | C <sub>23</sub> H <sub>36</sub> O <sub>8</sub>                | 56.333 | 203, 218sh, 278    | 441.2483 | 441.2505 | 4.99   | 139 (100)                                        | GC-1                                                 | D |
| Triterpenoid       | Gypsogenic acid                                                                                          | 74  | 170 | C <sub>30</sub> H <sub>46</sub> O <sub>5</sub>                | 38.451 | 214, 270, 358      | 487.3418 | 487.3372 | -9.40  | 487 (100)                                        | GM-3                                                 | D |
| Xanthanolide       | Xanthanol                                                                                                | 66  | 156 | C <sub>17</sub> H <sub>24</sub> O <sub>5</sub>                | 35.542 | 334                | 309.1697 | 309.1744 | 15.36  | 136 (100), 72 (77), 210 (56), 193 (54)           | C-9                                                  | D |

<sup>a</sup> Wine type: GE, BE = detected in green tea ethanolic extract and black tea ethanolic extract, respectively; C-1, C-3, C-6 etc. refer to Table 1.

<sup>b</sup> ID: identification method by S = standard, D = database and L = literature.

<sup>c</sup> Literature reported: (1) = Akhtar et al.<sup>1</sup>, (2) = Bastos et al.<sup>2</sup>, (3) = Chen et al.<sup>3</sup>, (4) = Dai et al.<sup>4</sup>, (5) = Dai et al.<sup>5</sup>, (6) = Del Rio et al.<sup>6</sup>, (7) = Fracassetti et al.<sup>7</sup>, (8) = Itoh et al.<sup>8</sup>, (9) = Jiang et al.<sup>9</sup>, (10) = Lantzouraki et al.<sup>10</sup>, (11) = Lin et al.<sup>11</sup>, (12) = Meng et al.<sup>12</sup>, (13) = Qi<sup>13</sup>, (14) = Rossetti et al.<sup>14</sup>, (15) = Sang and Yang<sup>15</sup>, (16) = Scoparo et al.<sup>16</sup>, (17) = Topi et al.<sup>17</sup>, (18) = Wang et al.<sup>18</sup>, (19) = Wang et al.<sup>19</sup>, (20) = Xie et al.<sup>20</sup>, (21) = Zhang et al.<sup>21</sup>, (22) = Zhang et al.<sup>22</sup>, (23) = Zhu et al.<sup>23</sup>.



\* = Semi-quantification: Quinic acid, Procyanidin B1 3-*O*-gallate, Quercetin 3-*O*-di-galactoside/glucoside, Myricetin 3-*O*-galactoside 1, Kaempferol 3-*O*-rutoside 2, Unknown quercetin conjugate and Unknown kaempferol conjugate were semi-quantified using the calibration curves of Chlorogenic acid, Procyanidin B1, Quercetin 3-*O*-galactoside, Quercetin 3-*O*-glucoside, Kaempferol 3-*O*-glucoside, Quercetin and Kaempferol, respectively.

ND = Not detected or value below the detection threshold.

C, 2GC, 4GC, 1BC, 3BC = Control Chardonnay wine, 2% (w/v) green tea-macerated Chardonnay wine, 4% (w/v) green tea-macerated Chardonnay wine, 1% (w/v) black tea-macerated Chardonnay wine, 3% (w/v) black tea-macerated Chardonnay wine.

tr = trace.

-- = Not available.

<sup>abcd</sup> = Values with different superscripts in the same wine group are significantly different ( $p < 0.05$ ).

**Table S3 HPLC-DAD quantification of phenolic compounds in tea-macerated model wines at different aging times (µg/mL)**

| Compounds                               | M                  |    |    |    | 2GM                                 |                                     |                                     |                                       | 4GM                                  |                                       |                                      |                                       | 1BM                                |                                    |                                     |                                      | 3BM                                  |                                      |                                     |                                      |
|-----------------------------------------|--------------------|----|----|----|-------------------------------------|-------------------------------------|-------------------------------------|---------------------------------------|--------------------------------------|---------------------------------------|--------------------------------------|---------------------------------------|------------------------------------|------------------------------------|-------------------------------------|--------------------------------------|--------------------------------------|--------------------------------------|-------------------------------------|--------------------------------------|
|                                         | Aging time (month) |    |    |    |                                     |                                     |                                     |                                       |                                      |                                       |                                      |                                       |                                    |                                    |                                     |                                      |                                      |                                      |                                     |                                      |
|                                         | 1                  | 3  | 6  | 9  | 1                                   | 3                                   | 6                                   | 9                                     | 1                                    | 3                                     | 6                                    | 9                                     | 1                                  | 3                                  | 6                                   | 9                                    | 1                                    | 3                                    | 6                                   | 9                                    |
| <i>Phenolic acids</i>                   |                    |    |    |    |                                     |                                     |                                     |                                       |                                      |                                       |                                      |                                       |                                    |                                    |                                     |                                      |                                      |                                      |                                     |                                      |
| Quinic acid*                            | ND                 | ND | ND | ND | tr                                  | 11.14 ± 1.08 <sup>a</sup>           | 177.59 ± 9.21 <sup>a</sup>          | 42.05 ± 2.32 <sup>a</sup>             | 1.56 ± 0.90 <sup>a</sup>             | 29.39 ± 10.01 <sup>b</sup>            | 319.58 ± 10.68 <sup>a</sup>          | 67.65 ± 38.03 <sup>b</sup>            | 16.26 ± 0.41 <sup>c</sup>          | 22.29 ± 0.59 <sup>b</sup>          | 54.61 ± 13.93 <sup>a</sup>          | 55.05 ± 10.45 <sup>a</sup>           | 76.32 ± 31.63 <sup>a</sup>           | 89.46 ± 35.19 <sup>a</sup>           | 122.30 ± 10.74 <sup>a</sup>         | 174.28 ± 26.64 <sup>a</sup>          |
| Galic acid                              | ND                 | ND | ND | ND | 110.20 ± 2.96 <sup>b</sup>          | 124.48 ± 8.10 <sup>b</sup>          | tr                                  | 204.31 ± 19.13 <sup>a</sup>           | 213.38 ± 66.35 <sup>b</sup>          | 218.84 ± 50.20 <sup>b</sup>           | tr                                   | 401.94 ± 161.35 <sup>a</sup>          | 6.10 ± 0.26 <sup>d</sup>           | 10.18 ± 0.46 <sup>c</sup>          | 23.23 ± 0.00 <sup>b</sup>           | 95.98 ± 106.13 <sup>a</sup>          | 48.26 ± 2.69 <sup>c</sup>            | 45.46 ± 22.46 <sup>c</sup>           | 64.81 ± 11.32 <sup>a</sup>          | 70.58 ± 32.65 <sup>a</sup>           |
| Chlorogenic acid                        | ND                 | ND | ND | ND | 24.01 ± 1.26 <sup>a</sup>           | 25.44 ± 2.13 <sup>a</sup>           | 22.77 ± 1.68 <sup>a</sup>           | 24.94 ± 17.31 <sup>a</sup>            | 51.31 ± 3.90 <sup>a</sup>            | 46.52 ± 10.33 <sup>a</sup>            | 47.76 ± 3.40 <sup>a</sup>            | 49.64 ± 23.29 <sup>a</sup>            | 0.32 ± 0.22 <sup>b</sup>           | tr                                 | 1.61 ± 1.77 <sup>b</sup>            | 11.46 ± 19.44 <sup>a</sup>           | 5.46 ± 4.69 <sup>a</sup>             | 5.78 ± 2.93 <sup>a</sup>             | 3.37 ± 0.19 <sup>a</sup>            | 4.55 ± 3.95 <sup>a</sup>             |
| <b>Total phenolic acids</b>             | --                 | -- | -- | -- | <b>134.21 ± 4.22<sup>c</sup></b>    | <b>161.05 ± 11.31<sup>c</sup></b>   | <b>200.36 ± 10.89<sup>b</sup></b>   | <b>271.30 ± 25.35<sup>a</sup></b>     | <b>266.25 ± 84.55<sup>c</sup></b>    | <b>294.76 ± 70.54<sup>c</sup></b>     | <b>367.35 ± 14.07<sup>b</sup></b>    | <b>519.23 ± 222.67<sup>a</sup></b>    | <b>22.67 ± 0.89<sup>c</sup></b>    | <b>32.47 ± 1.05<sup>c</sup></b>    | <b>79.45 ± 0.00<sup>b</sup></b>     | <b>162.49 ± 136.03<sup>a</sup></b>   | <b>130.04 ± 39.02<sup>a</sup></b>    | <b>140.69 ± 60.58<sup>a</sup></b>    | <b>190.47 ± 22.25<sup>a</sup></b>   | <b>249.41 ± 63.24<sup>a</sup></b>    |
| <i>Flavonoids</i>                       |                    |    |    |    |                                     |                                     |                                     |                                       |                                      |                                       |                                      |                                       |                                    |                                    |                                     |                                      |                                      |                                      |                                     |                                      |
| Gallic acid                             | ND                 | ND | ND | ND | 579.20 ± 23.48 <sup>d</sup>         | 780.93 ± 70.79 <sup>c</sup>         | 1001.59 ± 49.73 <sup>b</sup>        | 1836.30 ± 885.25 <sup>a</sup>         | 1070.10 ± 285.55 <sup>c</sup>        | 1349.94 ± 242.15 <sup>c</sup>         | 1891.93 ± 114.97 <sup>b</sup>        | 2364.61 ± 914.95 <sup>a</sup>         | 197.05 ± 4.27 <sup>d</sup>         | 246.22 ± 4.61 <sup>c</sup>         | 409.97 ± 39.15 <sup>b</sup>         | 833.81 ± 539.86 <sup>a</sup>         | 690.58 ± 318.56 <sup>b</sup>         | 785.98 ± 270.94 <sup>b</sup>         | 845.87 ± 60.22 <sup>b</sup>         | 965.80 ± 420.74 <sup>a</sup>         |
| Epigallocatechin                        | ND                 | ND | ND | ND | 626.08 ± 68.43 <sup>c</sup>         | 815.40 ± 48.55 <sup>b</sup>         | 1029.22 ± 52.71 <sup>a</sup>        | 895.27 ± 467.55 <sup>b</sup>          | 1187.07 ± 364.01 <sup>c</sup>        | 1383.97 ± 299.14 <sup>c</sup>         | 1795.85 ± 91.07 <sup>b</sup>         | 2095.17 ± 793.68 <sup>a</sup>         | 27.83 ± 5.47 <sup>d</sup>          | 43.63 ± 5.92 <sup>c</sup>          | 63.67 ± 17.07 <sup>b</sup>          | 374.53 ± 561.17 <sup>a</sup>         | 122.06 ± 62.42 <sup>c</sup>          | 165.58 ± 20.27 <sup>b</sup>          | 188.26 ± 13.91 <sup>a</sup>         | 109.08 ± 53.36 <sup>a</sup>          |
| Procyanidin B1                          | ND                 | ND | ND | ND | 26.85 ± 1.64 <sup>b</sup>           | 33.93 ± 1.23 <sup>a</sup>           | 27.88 ± 0.68 <sup>b</sup>           | 35.39 ± 0.97 <sup>a</sup>             | 42.23 ± 9.42 <sup>b</sup>            | 47.33 ± 5.37 <sup>b</sup>             | 42.73 ± 3.24 <sup>b</sup>            | 55.83 ± 18.42 <sup>a</sup>            | 8.27 ± 0.68 <sup>c</sup>           | 10.21 ± 0.83 <sup>b</sup>          | 10.38 ± 2.74 <sup>b</sup>           | 17.21 ± 14.17 <sup>a</sup>           | 21.52 ± 6.89 <sup>a</sup>            | 20.07 ± 3.64 <sup>a</sup>            | 20.39 ± 3.48 <sup>a</sup>           | 16.62 ± 8.73 <sup>a</sup>            |
| Catechin                                | ND                 | ND | ND | ND | 3165.80 ± 47.32 <sup>c</sup>        | 5592.70 ± 404.97 <sup>b</sup>       | 4952.16 ± 191.60 <sup>b</sup>       | 8335.28 ± 4249.99 <sup>a</sup>        | 5576.38 ± 1405.23 <sup>c</sup>       | 9405.58 ± 1430.41 <sup>c</sup>        | 8247.79 ± 485.22 <sup>b</sup>        | 9461.17 ± 3095.64 <sup>a</sup>        | 1175.54 ± 42.85 <sup>c</sup>       | 1438.55 ± 52.53 <sup>c</sup>       | 2207.71 ± 198.34 <sup>b</sup>       | 3751.95 ± 1811.69 <sup>a</sup>       | 3396.73 ± 1203.18 <sup>b</sup>       | 3890.03 ± 1056.94 <sup>b</sup>       | 4582.78 ± 289.20 <sup>b</sup>       | 4841.91 ± 2063.66 <sup>a</sup>       |
| Procyanidin B2                          | ND                 | ND | ND | ND | 99.38 ± 9.42 <sup>b</sup>           | 19.30 ± 1.63 <sup>a</sup>           | 140.25 ± 6.36 <sup>a</sup>          | 116.78 ± 45.06 <sup>b</sup>           | 182.94 ± 54.55 <sup>b</sup>          | 33.25 ± 5.85 <sup>c</sup>             | 252.13 ± 86.07 <sup>b</sup>          | 243.58 ± 0.44 <sup>b</sup>            | 3.22 ± 0.34 <sup>d</sup>           | 2.22 ± 0.34 <sup>d</sup>           | 2.91 ± 3.72 <sup>b</sup>            | 54.00 ± 78.50 <sup>a</sup>           | 19.10 ± 9.80 <sup>a</sup>            | 8.28 ± 2.43 <sup>b</sup>             | 11.93 ± 1.78 <sup>a</sup>           | 21.34 ± 11.87 <sup>a</sup>           |
| Epicatechin                             | ND                 | ND | ND | ND | tr                                  | 24.31 ± 1.77 <sup>b</sup>           | 52.69 ± 5.82 <sup>a</sup>           | 45.19 ± 2.98 <sup>b</sup>             | 46.18 ± 33.96 <sup>b</sup>           | 56.20 ± 14.19 <sup>b</sup>            | 137.69 ± 35.37 <sup>b</sup>          | 102.05 ± 51.65 <sup>a</sup>           | tr                                 | tr                                 | 4.84 ± 0.00 <sup>b</sup>            | 68.99 ± 0.00 <sup>a</sup>            | 35.32 ± 20.95 <sup>a</sup>           | 14.02 ± 6.57 <sup>b</sup>            | 10.61 ± 3.98 <sup>b</sup>           | 15.09 ± 6.86 <sup>b</sup>            |
| Epigallocatechin gallate                | ND                 | ND | ND | ND | 12.93 ± 0.43 <sup>d</sup>           | 22.07 ± 0.38 <sup>c</sup>           | 68.94 ± 5.02 <sup>b</sup>           | 137.73 ± 188.74 <sup>a</sup>          | 26.46 ± 11.05 <sup>c</sup>           | 35.12 ± 37.74 <sup>b</sup>            | 157.53 ± 19.51 <sup>b</sup>          | 64.75 ± 37.74 <sup>b</sup>            | 5.82 ± 0.46 <sup>d</sup>           | 8.71 ± 3.73 <sup>b</sup>           | 16.71 ± 20.83 <sup>a</sup>          | 33.60 ± 31.68 <sup>a</sup>           | 24.51 ± 3.43 <sup>b</sup>            | 28.40 ± 3.43 <sup>b</sup>            | 45.34 ± 11.64 <sup>b</sup>          | 72.61 ± 25.27 <sup>a</sup>           |
| Procyanidin B1 3-O-gallate*             | ND                 | ND | ND | ND | 1.13 ± 0.37 <sup>c</sup>            | 18.63 ± 3.95 <sup>b</sup>           | 18.04 ± 5.89 <sup>b</sup>           | 79.13 ± 24.58 <sup>a</sup>            | 74.51 ± 54.82 <sup>b</sup>           | 56.44 ± 16.68 <sup>b</sup>            | 128.50 ± 11.51 <sup>b</sup>          | 119.71 ± 88.43 <sup>a</sup>           | 3.44 ± 2.21 <sup>c</sup>           | 2.61 ± 2.87 <sup>b</sup>           | 8.80 ± 81.97 <sup>a</sup>           | 48.65 ± 18.22 <sup>b</sup>           | 40.45 ± 4.52 <sup>b</sup>            | 24.95 ± 9.18 <sup>b</sup>            | 39.83 ± 9.18 <sup>b</sup>           | 64.16 ± 23.06 <sup>a</sup>           |
| Gallic acid                             | ND                 | ND | ND | ND | 365.63 ± 96.87 <sup>b</sup>         | 500.54 ± 56.93 <sup>b</sup>         | 618.32 ± 365.84 <sup>a</sup>        | 460.22 ± 166.06 <sup>b</sup>          | 745.65 ± 93.86 <sup>b</sup>          | 828.61 ± 172.21 <sup>a</sup>          | 1013.78 ± 294.80 <sup>b</sup>        | 986.09 ± 0.85 <sup>a</sup>            | 26.17 ± 4.68 <sup>c</sup>          | 35.95 ± 48.55 <sup>b</sup>         | 267.88 ± 5.14 <sup>b</sup>          | 66.02 ± 25.99 <sup>b</sup>           | 79.14 ± 18.02 <sup>b</sup>           | 60.10 ± 14.91 <sup>b</sup>           | 55.32 ± 22.62 <sup>b</sup>          |                                      |
| Quercetin 3-O-di-galactoside/glucoside* | ND                 | ND | ND | ND | 6.25 ± 1.19 <sup>b</sup>            | 0.85 ± 0.00 <sup>c</sup>            | 0.85 ± 0.00 <sup>c</sup>            | 15.20 ± 5.20 <sup>a</sup>             | 15.96 ± 5.54 <sup>b</sup>            | 0.85 ± 0.00 <sup>c</sup>              | 23.41 ± 7.18 <sup>b</sup>            | 32.36 ± 13.53 <sup>a</sup>            | tr                                 | 0.82 ± 0.83 <sup>c</sup>           | 2.76 ± 2.12 <sup>b</sup>            | 7.73 ± 12.81 <sup>a</sup>            | 4.18 ± 0.52 <sup>b</sup>             | 0.34 ± 0.00 <sup>c</sup>             | 1.30 ± 1.65 <sup>b</sup>            | 2.84 ± 2.23 <sup>b</sup>             |
| Myricetin 3-O-galactoside 1*            | ND                 | ND | ND | ND | tr                                  | 17.56 ± 2.38 <sup>a</sup>           | tr                                  | 9.28 ± 0.00 <sup>c</sup>              | tr                                   | 34.07 ± 6.09 <sup>b</sup>             | tr                                   | 11.63 ± 0.00 <sup>c</sup>             | tr                                 | 1.41 ± 0.33 <sup>d</sup>           | tr                                  | 1.55 ± 0.31 <sup>d</sup>             | tr                                   | 8.66 ± 2.82 <sup>a</sup>             | 1.65 ± 1.65 <sup>b</sup>            | 5.68 ± 4.10 <sup>a</sup>             |
| Epicatechin gallate                     | ND                 | ND | ND | ND | 24.01 ± 0.92 <sup>b</sup>           | 26.24 ± 1.95 <sup>b</sup>           | 6.57 ± 0.00 <sup>c</sup>            | 40.43 ± 3.50 <sup>b</sup>             | 42.62 ± 12.91 <sup>b</sup>           | 42.89 ± 7.33 <sup>b</sup>             | 59.92 ± 6.82 <sup>b</sup>            | 58.00 ± 19.17 <sup>a</sup>            | 7.43 ± 0.22 <sup>d</sup>           | 8.13 ± 0.73 <sup>b</sup>           | 4.46 ± 3.17 <sup>b</sup>            | 20.35 ± 16.22 <sup>a</sup>           | 30.38 ± 12.14 <sup>a</sup>           | 25.06 ± 7.61 <sup>b</sup>            | 18.95 ± 5.06 <sup>b</sup>           | 23.45 ± 11.42 <sup>b</sup>           |
| Rutin                                   | ND                 | ND | ND | ND | 3.72 ± 0.50 <sup>d</sup>            | 6.88 ± 1.03 <sup>c</sup>            | 16.54 ± 1.31 <sup>a</sup>           | 11.32 ± 3.09 <sup>b</sup>             | 10.50 ± 4.62 <sup>b</sup>            | 14.33 ± 3.07 <sup>b</sup>             | 43.35 ± 3.32 <sup>a</sup>            | 16.36 ± 7.07 <sup>b</sup>             | 1.57 ± 0.19 <sup>d</sup>           | 2.09 ± 0.25 <sup>c</sup>           | 6.30 ± 0.49 <sup>a</sup>            | 6.84 ± 3.81 <sup>b</sup>             | 9.13 ± 2.39 <sup>b</sup>             | 9.17 ± 2.26 <sup>b</sup>             | 7.77 ± 4.23 <sup>b</sup>            |                                      |
| Quercetin 3-O-galactoside               | ND                 | ND | ND | ND | 3.09 ± 0.00 <sup>b</sup>            | 3.09 ± 0.61 <sup>b</sup>            | 0.85 ± ±0.00 <sup>c</sup>           | 6.47 ± 3.52 <sup>a</sup>              | 6.47 ± 2.35 <sup>b</sup>             | 9.06 ± 1.33 <sup>b</sup>              | 5.67 ± 0.96 <sup>c</sup>             | 8.74 ± 1.86 <sup>b</sup>              | tr                                 | 0.34 ± 0.00 <sup>c</sup>           | 5.97 ± 0.16 <sup>b</sup>            | 2.28 ± 3.36 <sup>b</sup>             | tr                                   | 3.58 ± 1.03 <sup>b</sup>             | 1.60 ± 0.66 <sup>b</sup>            | 0.34 ± 0.00 <sup>c</sup>             |
| Kaempferol 3-O-rutinoside 2*            | ND                 | ND | ND | ND | 5.16 ± 0.57 <sup>b</sup>            | 7.39 ± 0.87 <sup>b</sup>            | 0.07 ± 0.00 <sup>c</sup>            | 14.38 ± 2.34 <sup>a</sup>             | 13.35 ± 4.86 <sup>b</sup>            | 18.26 ± 3.55 <sup>b</sup>             | 17.78 ± 3.70 <sup>b</sup>            | 17.78 ± 4.68 <sup>b</sup>             | 2.31 ± 0.09 <sup>d</sup>           | 2.79 ± 0.07 <sup>c</sup>           | 0.03 ± 0.00 <sup>c</sup>            | 3.58 ± 4.38 <sup>a</sup>             | 11.07 ± 4.38 <sup>a</sup>            | 10.81 ± 3.20 <sup>a</sup>            | 0.03 ± 0.00 <sup>c</sup>            | 10.73 ± 5.11 <sup>a</sup>            |
| Kaempferol 3-O-glucoside                | ND                 | ND | ND | ND | tr                                  | 2.51 ± 0.01 <sup>b</sup>            | 7.95 ± 0.56 <sup>a</sup>            | 7.64 ± 6.03 <sup>a</sup>              | 5.47 ± 0.73 <sup>b</sup>             | 4.61 ± 1.05 <sup>c</sup>              | 25.83 ± 4.62 <sup>a</sup>            | 6.53 ± 2.26 <sup>b</sup>              | 1.52 ± 0.05 <sup>d</sup>           | 1.86 ± 0.16 <sup>b</sup>           | 3.81 ± 0.25 <sup>a</sup>            | 3.13 ± 0.28 <sup>a</sup>             | 5.89 ± 2.19 <sup>b</sup>             | 7.11 ± 1.37 <sup>b</sup>             | 10.02 ± 1.34 <sup>a</sup>           | 5.79 ± 2.51 <sup>b</sup>             |
| Unknown quercetin conjugate*            | ND                 | ND | ND | ND | 5.80 ± 0.20 <sup>b</sup>            | 6.36 ± 0.09 <sup>b</sup>            | 3.23 ± 0.00 <sup>c</sup>            | 6.53 ± 1.08 <sup>a</sup>              | 8.38 ± 1.45 <sup>a</sup>             | 8.88 ± 1.26 <sup>a</sup>              | 3.23 ± 0.00 <sup>c</sup>             | 9.84 ± 2.39 <sup>a</sup>              | tr                                 | 1.83 ± 0.09 <sup>b</sup>           | 1.29 ± 0.00 <sup>b</sup>            | 3.22 ± 1.83 <sup>a</sup>             | 2.67 ± 0.80 <sup>b</sup>             | 4.24 ± 0.55 <sup>a</sup>             | 1.29 ± 0.00 <sup>c</sup>            | 3.19 ± 1.28 <sup>a</sup>             |
| Unknown kaempferol conjugate*           | ND                 | ND | ND | ND | 3.66 ± 0.06 <sup>b</sup>            | 4.02 ± 0.11 <sup>a</sup>            | 5.31 ± 0.11 <sup>a</sup>            | 4.04 ± 0.35 <sup>b</sup>              | 4.79 ± 0.52 <sup>b</sup>             | 5.29 ± 0.56 <sup>b</sup>              | 7.21 ± 0.49 <sup>a</sup>             | 5.11 ± 0.87 <sup>b</sup>              | tr                                 | 1.40 ± 0.12 <sup>c</sup>           | 1.14 ± 0.00 <sup>b</sup>            | 1.85 ± 0.64 <sup>a</sup>             | 2.20 ± 0.70 <sup>b</sup>             | 2.52 ± 0.13 <sup>b</sup>             | 2.03 ± 0.30 <sup>b</sup>            | 2.09 ± 0.98 <sup>a</sup>             |
| <b>Total flavonoids</b>                 | --                 | -- | -- | -- | <b>4928.70 ± 251.40<sup>c</sup></b> | <b>7882.71 ± 579.80<sup>b</sup></b> | <b>7950.45 ± 376.72<sup>b</sup></b> | <b>12055.02 ± 6256.07<sup>a</sup></b> | <b>9059.06 ± 2417.61<sup>c</sup></b> | <b>13327.84 ± 2136.18<sup>b</sup></b> | <b>13858.20 ± 985.88<sup>b</sup></b> | <b>15659.30 ± 5433.21<sup>a</sup></b> | <b>1460.18 ± 56.73<sup>d</sup></b> | <b>1808.77 ± 76.39<sup>c</sup></b> | <b>2799.28 ± 278.94<sup>b</sup></b> | <b>5504.58 ± 3542.14<sup>a</sup></b> | <b>4481.82 ± 1701.00<sup>b</sup></b> | <b>5087.95 ± 1447.89<sup>b</sup></b> | <b>5874.55 ± 419.58<sup>b</sup></b> | <b>6223.79 ± 2668.05<sup>a</sup></b> |
| <i>Purine alkaloid</i>                  |                    |    |    |    |                                     |                                     |                                     |                                       |                                      |                                       |                                      |                                       |                                    |                                    |                                     |                                      |                                      |                                      |                                     |                                      |
| Caffeine                                | ND                 | ND | ND | ND | 918.66 ± 175.72 <sup>b</sup>        | 419.07 ± 20.35 <sup>c</sup>         | 1427.96 ± 183.42 <sup>a</sup>       | 1126.41 ± 735.27 <sup>b</sup>         | 1911.92 ± 433.91 <sup>b</sup>        | 690.71 ± 145.68 <sup>b</sup>          | 2434.06 ± 464.72 <sup>a</sup>        | 2552.21 ± 926.54 <sup>a</sup>         | 30.63 ± 3.57 <sup>b</sup>          | 24.33 ± 2.80 <sup>b</sup>          | 33.62 ± 8.61 <sup>b</sup>           | 68.64 ± 11.43 <sup>a</sup>           | 114.91 ± 50.03 <sup>a</sup>          | 75.87 ± 25.07 <sup>b</sup>           | 65.74 ± 1.84 <sup>b</sup>           | 91.32 ± 41.49 <sup>b</sup>           |
| <b>Total purine alkaloid</b>            | --                 | -- | -- | -- | <b>918.66 ± 175.72<sup>b</sup></b>  | <b>419.07 ± 20.35<sup>c</sup></b>   | <b>1427.96 ± 183.42<sup>a</sup></b> | <b>1126.41 ± 735.27<sup>b</sup></b>   | <b>1911.92 ± 433.91<sup>b</sup></b>  | <b>690.71 ± 145.68<sup>b</sup></b>    | <b>2434.06 ± 464.72<sup>a</sup></b>  | <b>2552.21 ± 926.54<sup>a</sup></b>   | <b>30.63 ± 3.57<sup>b</sup></b>    | <b>24.33 ± 2.80<sup>b</sup></b>    | <b>33.62 ± 8.61<sup>b</sup></b>     | <b>68.64 ± 11.43<sup>a</sup></b>     | <b>114.91 ± 50.03<sup>a</sup></b>    | <b>75.87 ± 25.07<sup>b</sup></b>     | <b>65.74 ± 1.84<sup>b</sup></b>     | <b>91.32 ± 41.49<sup>b</sup></b>     |

\* = Semi-quantification: Quinic acid, Procyanidin B1 3-*O*-gallate, Quercetin 3-*O*-di-galactoside/glucoside, Myricetin 3-*O*-galactoside 1, Kaempferol 3-*O*-rutoside 2, Unknown quercetin conjugate and Unknown kaempferol conjugate were semi-quantified using the calibration curves of Chlorogenic acid, Procyanidin B1, Quercetin 3-*O*-galactoside, Quercetin 3-*O*-galactoside, Kaempferol 3-*O*-glucoside, Quercetin and Kaempferol, respectively.

ND = Not detected or value below the detection threshold.

M, 2GM, 4GM, 1BM, 3BM = model wine, 2% (w/v) green tea-macerated model wine, 4% (w/v) green tea-macerated model wine, 1% (w/v) black tea-macerated model wine, 3% (w/v) black tea-macerated model wine.

tr = trace.

-- = Not available.

<sup>abcd</sup> = Values with different superscripts in the same wine group are significantly different ( $p < 0.05$ ).





|    |                 |                                   |                                   |                                |                                  |                                |                                   |                               |                                   |                                |                                   |                                 |                                   |                               |                                   |                                   |                                  |                               |                                   |                                |                                   |               |                              |                                                 |
|----|-----------------|-----------------------------------|-----------------------------------|--------------------------------|----------------------------------|--------------------------------|-----------------------------------|-------------------------------|-----------------------------------|--------------------------------|-----------------------------------|---------------------------------|-----------------------------------|-------------------------------|-----------------------------------|-----------------------------------|----------------------------------|-------------------------------|-----------------------------------|--------------------------------|-----------------------------------|---------------|------------------------------|-------------------------------------------------|
| 8  | Limonene        | 117<br>0                          | ND                                | ND                             | ND                               | ND                             | 0.02 ±<br>0.00 <sup>a</sup>       | 0.02 ±<br>0.00 <sup>b</sup>   | 0.02 ±<br>0.00 <sup>a</sup>       | 0.02 ±<br>0.00 <sup>a</sup>    | 0.03 ±<br>0.00 <sup>a</sup>       | 0.03 ±<br>0.00 <sup>a</sup>     | 0.03 ±<br>0.00 <sup>a</sup>       | 0.03 ±<br>0.00 <sup>a</sup>   | 0.02 ±<br>0.00 <sup>a</sup>       | 0.02 ±<br>0.00 <sup>a</sup>       | 0.02 ±<br>0.00 <sup>a</sup>      | 0.02 ±<br>0.00 <sup>a</sup>   | 0.02 ±<br>0.00 <sup>a</sup>       | 0.02 ±<br>0.00 <sup>b</sup>    | 0.02 ±<br>0.00 <sup>b</sup>       | RI, MS,<br>ES | Citrus, orange, fresh, sweet |                                                 |
| 15 | Terpinolene**** | 125<br>5                          | ND                                | ND                             | ND                               | ND                             | 0.01 ±<br>0.00                    | tr                            | tr                                | tr                             | 0.01 ±<br>0.00 <sup>a</sup>       | tr                              | 0.01 ±<br>0.00 <sup>b</sup>       | tr                            | tr                                | tr                                | tr                               | tr                            | tr                                | tr                             | tr                                | tr            | RI, MS,<br>ES                | Sweet, fresh pine, citrus, woody, lemon<br>peel |
|    | Total terpene   |                                   | ND                                | ND                             | ND                               | ND                             | 0.03 ±<br>0.00 <sup>a</sup>       | 0.02 ±<br>0.00 <sup>b</sup>   | 0.02 ±<br>0.00 <sup>a</sup>       | 0.02 ±<br>0.00 <sup>b</sup>    | 0.04 ±<br>0.00 <sup>a</sup>       | 0.04 ±<br>0.00 <sup>a</sup>     | 0.04 ±<br>0.00 <sup>b</sup>       | 0.03 ±<br>0.00 <sup>a</sup>   | 0.02 ±<br>0.00 <sup>b</sup>       | 0.02 ±<br>0.00 <sup>b</sup>       | 0.02 ±<br>0.00 <sup>a</sup>      | 0.02 ±<br>0.00 <sup>a</sup>   | 0.02 ±<br>0.00 <sup>ab</sup>      | 0.02 ±<br>0.00 <sup>ab</sup>   | 0.02 ±<br>0.00 <sup>b</sup>       |               |                              |                                                 |
|    | Total           | 160.45<br>±<br>14.40 <sup>a</sup> | 166.68<br>±<br>13.12 <sup>a</sup> | 166.81 ±<br>32.22 <sup>a</sup> | 118.39<br>±<br>3.91 <sup>b</sup> | 143.29 ±<br>10.77 <sup>b</sup> | 160.2<br>3 ±<br>8.32 <sup>b</sup> | 145.49 ±<br>8.32 <sup>b</sup> | 123.61<br>±<br>16.53 <sup>c</sup> | 146.87 ±<br>12.65 <sup>b</sup> | 172.84<br>±<br>14.52 <sup>a</sup> | 158.53 ±<br>17.92 <sup>ab</sup> | 120.08<br>±<br>13.98 <sup>c</sup> | 136.57 ±<br>5.90 <sup>b</sup> | 182.26<br>±<br>43.71 <sup>a</sup> | 149.45<br>±<br>12.25 <sup>b</sup> | 115.43<br>±<br>6.98 <sup>c</sup> | 151.87 ±<br>8.01 <sup>b</sup> | 160.79<br>±<br>11.86 <sup>a</sup> | 151.66 ±<br>19.78 <sup>b</sup> | 127.87<br>±<br>16.28 <sup>c</sup> |               |                              |                                                 |

\*RI = retention index

\*\*ID = Identification by comparison of mass spectra (MS) with in-house NIST library 11.0, MS and retention index (RI) with NIST Webbook (NIST<sup>24</sup>), and MS and retention time with external standards

\*\*\* = Odor description were obtained from TGSC<sup>25</sup>.

\*\*\*\*= Semi-quantification: Ethoxyacetic acid, acetic acid, pterin-6-carboxylic acid, 2-methyl-1-propanol, 2-pentanol, 2-hexanol, 1-(2-aminoethylamino)-2-propanol, 2-octen-4-ol, 3-methyl-1-pentanol, 2-methyl-4-heptanol, 2,3-butanediol, phenylethyl alcohol, 3-hydroxybutanal, myristicin, 3-hydroxymandelic acid ethyl ester, ethyl (*E*)-3-hexenoate, ethyl lactate, propyl hexanoate, ethyl 3-hydroxybutanoate, isoamyl lactate, ethyl 2-furancarboxylate, ethyl 9-decenoate and 3-hydroxy-2-butanone were semi-quantified using the calibration curves of ethyl hexanoate, ethyl octanoate, 2-ethyl-1-hexanol, 3-methylbutyl acetate, 1-butanol, 1-butanol, ethyl hexanoate, 1-hexanol, 1-hexanol, 1-hexanol, 1-octanol, benzyl alcohol, ethyl hexanoate, benzaldehyde, 1-butanol, 1-hexanol, 2-heptanol, 2-heptanol, ethyl nonanoate, 1-octanol, benzeneacetaldehyde, diethyl succinate and ethyl hexanoate, respectively.

Samples of C, 2GC, 4GC etc. refer to Table S2.

ND = Not detected or value below the detection threshold.

tr = trace

-- = Not available.

a-d = Values with different superscripts in the same wine group are significantly different ( $p \leq 0.05$ )



**Table S5** Effect of aging time on volatile compounds of tea-macerated model wines ( $\mu\text{g/mL}$ )

| Peak No. | Compound name                        | RI*  | Aging time (month)             |                                |                                |                                |                                |                                |                                 |                                 |                                |                                |                                |                                |                                |                                |                                |                                |                                |                                |                                |                                | ID**                     | Odor description***                                  |                                                                |
|----------|--------------------------------------|------|--------------------------------|--------------------------------|--------------------------------|--------------------------------|--------------------------------|--------------------------------|---------------------------------|---------------------------------|--------------------------------|--------------------------------|--------------------------------|--------------------------------|--------------------------------|--------------------------------|--------------------------------|--------------------------------|--------------------------------|--------------------------------|--------------------------------|--------------------------------|--------------------------|------------------------------------------------------|----------------------------------------------------------------|
|          |                                      |      | M                              |                                |                                |                                | 2GM                            |                                |                                 |                                 | 4GM                            |                                |                                |                                | 1BM                            |                                |                                |                                | 3BM                            |                                |                                |                                |                          |                                                      |                                                                |
|          |                                      |      | 1                              | 3                              | 6                              | 9                              | 1                              | 3                              | 6                               | 9                               | 1                              | 3                              | 6                              | 9                              | 1                              | 3                              | 6                              | 9                              | 1                              | 3                              | 6                              | 9                              |                          |                                                      |                                                                |
| 17       | Ethoxyacetic acid****                | 1268 | 0.01 ± 0.00                    | tr                             | tr                             | tr                             | 0.01 ± 0.00 <sup>a</sup>       | 0.01 ± 0.00 <sup>ab</sup>      | 0.01 ± 0.00 <sup>b</sup>        | tr                              | 0.01 ± 0.00 <sup>a</sup>       | 0.01 ± 0.01 <sup>ab</sup>      | 0.01 ± 0.00 <sup>b</sup>       | 0.01 ± 0.00 <sup>b</sup>       | 0.03 ± 0.02 <sup>a</sup>       | 0.02 ± 0.01 <sup>b</sup>       | 0.01 ± 0.00 <sup>c</sup>       | 0.01 ± 0.00 <sup>c</sup>       | 0.02 ± 0.02 <sup>a</sup>       | 0.02 ± 0.01 <sup>a</sup>       | 0.01 ± 0.00 <sup>b</sup>       | 0.01 ± 0.01 <sup>b</sup>       | RI, MS                   | --                                                   |                                                                |
| 28       | Acetic acid****                      | 1433 | ND                             | ND                             | ND                             | tr                             | tr                             | tr                             | tr                              | tr                              | tr                             | tr                             | tr                             | tr                             | tr                             | tr                             | tr                             | tr                             | tr                             | tr                             | tr                             | tr                             | tr                       | RI, MS                                               | Pungent, acidic, cheesy, vinegar                               |
| 29       | Pterin-6-carboxylic acid****         | 1461 | ND                             | ND                             | ND                             | tr                             | tr                             | tr                             | tr                              | tr                              | tr                             | tr                             | tr                             | tr                             | tr                             | tr                             | tr                             | tr                             | tr                             | tr                             | tr                             | tr                             | tr                       | RI, MS                                               | --                                                             |
| 49       | Hexanoic acid                        | 1829 | ND                             | ND                             | ND                             | 0.58 ± 0.02                    | tr                             | tr                             | tr                              | tr                              | tr                             | tr                             | tr                             | tr                             | tr                             | tr                             | tr                             | tr                             | 0.61 ± 0.01 <sup>a</sup>       | tr                             | 0.62 ± 0.01 <sup>a</sup>       | 0.60 ± 0.00 <sup>a</sup>       | RI, MS, ES               | Sour, fatty, sweaty, cheesy                          |                                                                |
| 53       | Octanoic acid                        | 2046 | ND                             | ND                             | ND                             | 0.66 ± 0.03                    | tr                             | tr                             | tr                              | tr                              | tr                             | tr                             | tr                             | tr                             | tr                             | tr                             | tr                             | tr                             | tr                             | tr                             | tr                             | tr                             | tr                       | RI, MS, ES                                           | Fatty, waxy, rancid, oily, vegetable, cheesy                   |
| 54       | Nonanoic acid                        | 2269 | ND                             | ND                             | ND                             | tr                             | tr                             | tr                             | tr                              | tr                              | tr                             | tr                             | tr                             | tr                             | tr                             | tr                             | tr                             | tr                             | tr                             | tr                             | tr                             | tr                             | tr                       | RI, MS, ES                                           | Waxy, dirty, cheese, cultured, dairy                           |
|          | <b>Total acid</b>                    |      | <b>0.01 ± 0.00</b>             | <b>tr</b>                      | <b>tr</b>                      | <b>tr</b>                      | <b>1.25 ± 0.05<sup>a</sup></b> | <b>0.01 ± 0.00<sup>a</sup></b> | <b>0.01 ± 0.00<sup>b</sup></b>  | <b>0.01 ± 0.00<sup>b</sup></b>  | <b>0.01 ± 0.01<sup>a</sup></b> | <b>0.01 ± 0.01<sup>a</sup></b> | <b>0.01 ± 0.00<sup>a</sup></b> | <b>0.01 ± 0.01<sup>a</sup></b> | <b>0.03 ± 0.02<sup>a</sup></b> | <b>0.03 ± 0.01<sup>a</sup></b> | <b>0.01 ± 0.01<sup>c</sup></b> | <b>0.01 ± 0.01<sup>c</sup></b> | <b>0.64 ± 0.02<sup>a</sup></b> | <b>0.02 ± 0.01<sup>a</sup></b> | <b>0.63 ± 0.02<sup>a</sup></b> | <b>0.61 ± 0.01<sup>a</sup></b> |                          |                                                      |                                                                |
| 3        | 2-Methyl-1-propanol****              | 1079 | ND                             | ND                             | ND                             | 0.01 ± 0.01 <sup>a</sup>       | 0.01 ± 0.00 <sup>a</sup>       | 0.01 ± 0.00 <sup>a</sup>       | 0.01 ± 0.00 <sup>a</sup>        | 0.02 ± 0.01 <sup>a</sup>        | 0.01 ± 0.01 <sup>b</sup>       | 0.01 ± 0.00 <sup>b</sup>       | 0.01 ± 0.00 <sup>b</sup>       | tr                             | 0.01 ± 0.00                    | tr                             | tr                             | 0.01 ± 0.00 <sup>a</sup>       | RI, MS                         | Ethereal, winery, cortex |                                                      |                                                                |
| 5        | 2-Pentanol****                       | 1127 | ND                             | ND                             | ND                             | tr                             | tr                             | tr                             | tr                              | tr                              | tr                             | tr                             | tr                             | tr                             | tr                             | tr                             | tr                             | tr                             | tr                             | tr                             | tr                             | tr                             | tr                       | RI, MS                                               | Mild, green, fusel, oil, fermented                             |
| 6        | 1-Butanol                            | 1132 | ND                             | ND                             | ND                             | tr                             | tr                             | tr                             | tr                              | tr                              | tr                             | tr                             | tr                             | tr                             | tr                             | tr                             | tr                             | tr                             | tr                             | tr                             | tr                             | tr                             | tr                       | RI, MS, ES                                           | Fusel, oil, sweet, balsam, whiskey                             |
| 7        | 2-Hexanol****                        | 1142 | ND                             | ND                             | ND                             | tr                             | tr                             | tr                             | tr                              | 0.26 ± 0.05 <sup>b</sup>        | 0.93 ± 0.17 <sup>a</sup>       | tr                             | 0.67 ± 0.16                    | tr                             | tr                             | tr                             | tr                       | RI, MS                                               | Chemical, winery, fruity, fatty, terpenic, cauliflower         |
| 10       | 3-Methyl-1-butanol                   | 1196 | ND                             | ND                             | ND                             | 0.01 ± 0.00                    | tr                             | tr                             | tr                              | tr                              | tr                             | tr                             | tr                             | tr                             | tr                             | tr                             | tr                             | tr                             | tr                             | tr                             | tr                             | tr                             | tr                       | RI, MS, ES                                           | Fusel, oily, alcoholic, whiskey, fruity, banana                |
| 12       | 1-(2-Aminoethylamino)-2-propanol**** | 1228 | ND                             | ND                             | ND                             | tr                             | tr                             | tr                             | tr                              | tr                              | tr                             | tr                             | tr                             | tr                             | tr                             | tr                             | tr                             | tr                             | tr                             | tr                             | tr                             | tr                             | tr                       | RI, MS                                               | --                                                             |
| 20       | 2-Octen-4-ol****                     | 1304 | ND                             | ND                             | ND                             | 0.11 ± 0.02 <sup>a</sup>       | 0.03 ± 0.01 <sup>a</sup>       | 0.07 ± 0.02 <sup>b</sup>       | 0.08 ± 0.03 <sup>b</sup>        | 0.10 ± 0.02 <sup>b</sup>        | 0.07 ± 0.05 <sup>a</sup>       | 0.10 ± 0.07 <sup>b</sup>       | 0.23 ± 0.09 <sup>a</sup>       | 0.06 ± 0.00                    | tr                             | tr                             | tr                             | tr                             | 0.03 ± 0.01 <sup>a</sup>       | 0.01 ± 0.00 <sup>b</sup>       | 0.01 ± 0.00 <sup>b</sup>       | 0.01 ± 0.01 <sup>b</sup>       | RI, MS                   | Fruity, berry                                        |                                                                |
| 21       | 3-Methyl-1-pentanol****              | 1315 | ND                             | ND                             | ND                             | tr                             | tr                             | tr                             | tr                              | tr                              | tr                             | tr                             | tr                             | tr                             | tr                             | tr                             | tr                             | tr                             | tr                             | tr                             | tr                             | tr                             | tr                       | RI, MS                                               | Fusel, cognac, wine, cocoa, green, fruity                      |
| 24       | (E)-3-Hexen-1-ol                     | 1350 | ND                             | ND                             | ND                             | tr                             | tr                             | tr                             | tr                              | tr                              | tr                             | tr                             | tr                             | tr                             | tr                             | tr                             | tr                             | tr                             | tr                             | tr                             | 0.03 ± 0.00                    | tr                             | tr                       | RI, MS, ES                                           | Green, leafy                                                   |
| 25       | 1-Hexanol                            | 1343 | ND                             | ND                             | ND                             | tr                             | tr                             | tr                             | tr                              | tr                              | tr                             | tr                             | tr                             | tr                             | tr                             | tr                             | tr                             | tr                             | 0.02 ± 0.00                    | tr                             | tr                             | tr                             | tr                       | RI, MS, ES                                           | Pungen, ethereal, fusel, oily, fruity, alcoholic, sweet, green |
| 26       | 2-Methyl-4-heptanol****              | 1385 | ND                             | ND                             | ND                             | tr                             | tr                             | tr                             | tr                              | tr                              | tr                             | tr                             | tr                             | tr                             | tr                             | tr                             | tr                             | tr                             | 0.74 ± 0.00                    | tr                             | tr                             | tr                             | tr                       | RI, MS                                               | --                                                             |
| 30       | 2-Ethyl-1-hexanol                    | 1480 | ND                             | ND                             | 0.01 ± 0.00                    | tr                             | tr                             | tr                             | 0.01 ± 0.00                     | tr                              | tr                             | tr                             | tr                             | tr                             | tr                             | tr                             | tr                             | tr                             | tr                             | tr                             | tr                             | 0.01 ± 0.00                    | tr                       | RI, MS, ES                                           | Citrus, fresh, floral, oily, sweet                             |
| 35       | Linalool                             | 1537 | ND                             | ND                             | ND                             | tr                             | 0.08 ± 0.00 <sup>b</sup>       | tr                             | 0.14 ± 0.00 <sup>a</sup>        | 0.07 ± 0.06 <sup>d</sup>        | 0.15 ± 0.00 <sup>b</sup>       | 0.35 ± 0.00 <sup>b</sup>       | 0.55 ± 0.00 <sup>a</sup>       | tr                             | tr                             | tr                             | tr                             | tr                             | 0.11 ± 0.01 <sup>b</sup>       | tr                             | 0.11 ± 0.00 <sup>b</sup>       | 0.14 ± 0.03 <sup>b</sup>       | RI, MS, ES               | Citrus, floral, sweet, rose, woody, green, blueberry |                                                                |
| 36       | 1-Octanol                            | 1550 | ND                             | ND                             | ND                             | tr                             | tr                             | 0.01 ± 0.00                    | tr                              | tr                              | 0.01 ± 0.00 <sup>a</sup>       | 0.02 ± 0.00 <sup>b</sup>       | 0.04 ± 0.00 <sup>a</sup>       | tr                             | tr                       | RI, MS, ES                                           | Waxy, green, orange, aldehydic, rose, mushroom                 |
| 38       | 2,3-Butanediol****                   | 1571 | ND                             | ND                             | tr                             | tr                             | tr                             | tr                             | tr                              | tr                              | tr                             | tr                             | tr                             | tr                             | tr                             | tr                             | tr                             | tr                             | tr                             | tr                             | tr                             | tr                             | tr                       | RI, MS                                               | Fruity, creamy, buttery                                        |
| 52       | Phenylethyl alcohol****              | 1891 | ND                             | ND                             | ND                             | 0.36 ± 0.33                    | tr                             | tr                             | tr                              | tr                              | tr                             | tr                             | tr                             | tr                             | tr                             | 0.01 ± 0.00 <sup>b</sup>       | 0.44 ± 0.07 <sup>a</sup>       | 1.27 ± 0.01 <sup>b</sup>       | 1.53 ± 0.00 <sup>b</sup>       | 2.23 ± 0.10 <sup>a</sup>       | 2.20 ± 0.41 <sup>a</sup>       | tr                             | tr                       | RI, MS                                               | Sweet, floral, fresh, breadly, rose, honey                     |
|          | <b>Total alcohol</b>                 |      | <b>ND</b>                      | <b>ND</b>                      | <b>0.01 ± 0.00</b>             | <b>0.49 ± 0.36<sup>a</sup></b> | <b>0.12 ± 0.02<sup>c</sup></b> | <b>0.09 ± 0.02<sup>c</sup></b> | <b>0.23 ± 0.03<sup>b</sup></b>  | <b>0.45 ± 0.14<sup>c</sup></b>  | <b>1.18 ± 0.23<sup>a</sup></b> | <b>0.48 ± 0.07<sup>c</sup></b> | <b>0.84 ± 0.09<sup>b</sup></b> | <b>0.07 ± 0.00<sup>b</sup></b> | <b>0.02 ± 0.00<sup>b</sup></b> | <b>0.02 ± 0.00<sup>b</sup></b> | <b>0.44 ± 0.07<sup>a</sup></b> | <b>2.85 ± 0.18<sup>a</sup></b> | <b>1.56 ± 0.01<sup>b</sup></b> | <b>2.40 ± 0.11<sup>a</sup></b> | <b>2.37 ± 0.45<sup>a</sup></b> |                                |                          |                                                      |                                                                |
| 13       | 3-Hydroxybutanal****                 | 1243 | ND                             | tr                             | ND                             | tr                             | tr                             | tr                             | tr                              | tr                              | tr                             | tr                             | tr                             | tr                             | tr                             | tr                             | tr                             | tr                             | tr                             | tr                             | tr                             | tr                             | tr                       | RI, MS                                               | --                                                             |
| 19       | Octanal                              | 1289 | 1.11 ± 0.15 <sup>a</sup>       | 0.89 ± 0.10 <sup>b</sup>       | 0.62 ± 0.51 <sup>c</sup>       | 0.76 ± 0.08 <sup>b</sup>       | 2.06 ± 0.52 <sup>a</sup>       | 1.40 ± 0.17 <sup>b</sup>       | 1.52 ± 0.31 <sup>ab</sup>       | 1.48 ± 0.26 <sup>ab</sup>       | 1.69 ± 0.98 <sup>a</sup>       | 1.02 ± 0.82 <sup>b</sup>       | 0.39 ± 0.60 <sup>c</sup>       | 1.04 ± 1.00 <sup>b</sup>       | 3.14 ± 1.13 <sup>a</sup>       | 2.55 ± 1.05 <sup>b</sup>       | 1.01 ± 0.79 <sup>c</sup>       | 2.25 ± 0.74 <sup>b</sup>       | 2.22 ± 1.23 <sup>a</sup>       | 2.33 ± 0.89 <sup>b</sup>       | 0.57 ± 0.88 <sup>c</sup>       | 1.26 ± 1.13 <sup>b</sup>       | RI, MS                   | Aldehydic, waxy, citrus, orange, green, peely        |                                                                |
|          | <b>Total aldehyde</b>                |      | <b>1.11 ± 0.15<sup>a</sup></b> | <b>0.89 ± 0.10<sup>b</sup></b> | <b>0.62 ± 0.51<sup>c</sup></b> | <b>0.76 ± 0.08<sup>b</sup></b> | <b>2.06 ± 0.52<sup>a</sup></b> | <b>1.40 ± 0.17<sup>b</sup></b> | <b>1.52 ± 0.31<sup>ab</sup></b> | <b>1.48 ± 0.26<sup>ab</sup></b> | <b>1.69 ± 0.98<sup>a</sup></b> | <b>1.02 ± 0.82<sup>b</sup></b> | <b>0.39 ± 0.60<sup>c</sup></b> | <b>1.04 ± 1.00<sup>b</sup></b> | <b>3.14 ± 1.13<sup>a</sup></b> | <b>2.55 ± 1.05<sup>b</sup></b> | <b>1.01 ± 0.79<sup>c</sup></b> | <b>2.25 ± 0.74<sup>b</sup></b> | <b>2.22 ± 1.23<sup>a</sup></b> | <b>2.33 ± 0.89<sup>b</sup></b> | <b>0.57 ± 0.88<sup>c</sup></b> | <b>1.26 ± 1.13<sup>b</sup></b> |                          |                                                      |                                                                |



|    |                 |          |                                  |                                 |                              |                             |                              |                                  |                              |                                 |                               |                                  |                               |                              |                               |                                  |                                  |                              |                               |                                  |                               |                               |    |               |                                                 |
|----|-----------------|----------|----------------------------------|---------------------------------|------------------------------|-----------------------------|------------------------------|----------------------------------|------------------------------|---------------------------------|-------------------------------|----------------------------------|-------------------------------|------------------------------|-------------------------------|----------------------------------|----------------------------------|------------------------------|-------------------------------|----------------------------------|-------------------------------|-------------------------------|----|---------------|-------------------------------------------------|
| 15 | Terpinolene**** | 125<br>5 | ND                               | ND                              | ND                           | ND                          | tr                           | tr                               | tr                           | tr                              | tr                            | tr                               | tr                            | tr                           | tr                            | tr                               | tr                               | tr                           | tr                            | tr                               | tr                            | tr                            | tr | RI, MS,<br>ES | Sweet, fresh pine, citrus, woody, lemon<br>peel |
|    | Total terpene   |          | ND                               | ND                              | ND                           | ND                          | 0.02 ±<br>0.00 <sup>b</sup>  | 0.02 ±<br>0.00 <sup>b</sup>      | 0.02 ±<br>0.00 <sup>b</sup>  | 0.02 ±<br>0.00 <sup>b</sup>     | 0.03 ±<br>0.00 <sup>b</sup>   | 0.03 ±<br>0.00 <sup>b</sup>      | 0.03 ±<br>0.00 <sup>b</sup>   | 0.03 ±<br>0.00 <sup>b</sup>  | 0.02 ±<br>0.00 <sup>a</sup>   | 0.02 ±<br>0.00 <sup>a</sup>      | 0.02 ±<br>0.00 <sup>a</sup>      | 0.02 ±<br>0.00 <sup>a</sup>  | 0.02 ±<br>0.00 <sup>b</sup>   | 0.02 ±<br>0.00 <sup>b</sup>      | 0.02 ±<br>0.00 <sup>ab</sup>  | 0.02 ±<br>0.00 <sup>ab</sup>  |    |               |                                                 |
|    | Total           |          | 42.60<br>±<br>29.24 <sup>a</sup> | 33.76<br>±<br>2.89 <sup>b</sup> | 15.51 ±<br>1.88 <sup>c</sup> | 8.55 ±<br>1.85 <sup>d</sup> | 31.78 ±<br>8.86 <sup>a</sup> | 34.58<br>±<br>13.31 <sup>a</sup> | 25.26 ±<br>5.84 <sup>b</sup> | 17.24<br>±<br>5.11 <sup>c</sup> | 22.36 ±<br>13.22 <sup>b</sup> | 38.84<br>±<br>17.86 <sup>a</sup> | 16.38 ±<br>14.20 <sup>c</sup> | 17.66 ±<br>8.70 <sup>b</sup> | 38.54 ±<br>12.76 <sup>c</sup> | 55.51<br>±<br>20.78 <sup>a</sup> | 44.85<br>±<br>25.35 <sup>b</sup> | 20.90 ±<br>7.13 <sup>d</sup> | 34.89 ±<br>16.27 <sup>c</sup> | 41.05<br>±<br>19.27 <sup>b</sup> | 51.18 ±<br>14.98 <sup>a</sup> | 21.57 ±<br>10.35 <sup>d</sup> |    |               |                                                 |

\*RI = retention index

\*\*ID = Identification by comparison of mass spectra (MS) with in-house NIST library 11.0, MS and retention index (RI) with NIST Webbook (NIST<sup>24</sup>), and MS and retention time with external standards

\*\*\* = Odor description were obtained from TGSC<sup>25</sup>.

\*\*\*\*= Semi-quantification: Ethoxyacetic acid, acetic acid, pterin-6-carboxylic acid, 2-methyl-1-propanol, 2-pentanol, 2-hexanol, 1-(2-aminoethylamino)-2-propanol, 2-octen-4-ol, 3-methyl-1-pentanol, 2-methyl-4-heptanol, 2,3-butanediol, phenylethyl alcohol, 3-hydroxybutanal, myristicin, 3-hydroxymandelic acid ethyl ester, ethyl (*E*)-3-hexenoate, ethyl lactate, propyl hexanoate, ethyl 3-hydroxybutanoate, isoamyl lactate, ethyl 2-furancarboxylate, ethyl 9-decenoate and 3-hydroxy-2-butanone were semi-quantified using the calibration curves of ethyl hexanoate, ethyl octanoate, 2-ethyl-1-hexanol, 3-methylbutyl acetate, 1-butanol, 1-butanol, ethyl hexanoate, 1-hexanol, 1-hexanol, 1-hexanol, 1-octanol, benzyl alcohol, ethyl hexanoate, benzaldehyde, 1-butanol, 1-hexanol, 2-heptanol, 2-heptanol, ethyl nonanoate, 1-octanol, benzeneacetaldehyde, diethyl succinate and ethyl hexanoate, respectively.

Samples of M, 2GM, 4GM etc. refer to Table S3.

ND = Not detected or value below the detection threshold.

tr = trace

-- = Not available.

a-d = Values with different superscripts in the same wine group are significantly different ( $p \leq 0.05$ )

**Table S6** Correlation matrix of quantified phenolic and volatile compounds, physicochemical properties and tested responses of tea-macerated Chardonnay wines

(continued 1/7)

| Variables                              | TA            | pH            | TPC           | TFC           | DPPH          | FRAP          | ABTS          | L*            | a*            | b*            | Quinic acid   | Gallic acid   | Chlorogenic acid | Total phenolic acids | Gallocatechin |
|----------------------------------------|---------------|---------------|---------------|---------------|---------------|---------------|---------------|---------------|---------------|---------------|---------------|---------------|------------------|----------------------|---------------|
| TA                                     | <b>1</b>      | <b>-0.967</b> | <b>-0.729</b> | <b>-0.748</b> | <b>-0.802</b> | <b>-0.743</b> | <b>-0.723</b> | <b>0.451</b>  | -0.375        | <b>-0.572</b> | <b>-0.602</b> | <b>-0.590</b> | <b>-0.739</b>    | <b>-0.701</b>        | <b>-0.806</b> |
| pH                                     | <b>-0.967</b> | <b>1</b>      | <b>0.786</b>  | <b>0.801</b>  | <b>0.857</b>  | <b>0.790</b>  | <b>0.777</b>  | <b>-0.495</b> | 0.409         | <b>0.601</b>  | <b>0.617</b>  | <b>0.664</b>  | <b>0.794</b>     | <b>0.743</b>         | <b>0.869</b>  |
| TPC                                    | <b>-0.729</b> | <b>0.786</b>  | <b>1</b>      | <b>0.940</b>  | <b>0.975</b>  | <b>0.844</b>  | <b>0.910</b>  | -0.434        | <b>0.448</b>  | <b>0.563</b>  | <b>0.792</b>  | <b>0.875</b>  | <b>0.949</b>     | <b>0.954</b>         | <b>0.945</b>  |
| TFC                                    | <b>-0.748</b> | <b>0.801</b>  | <b>0.940</b>  | <b>1</b>      | <b>0.932</b>  | <b>0.916</b>  | <b>0.961</b>  | -0.295        | 0.227         | 0.422         | <b>0.635</b>  | <b>0.890</b>  | <b>0.970</b>     | <b>0.852</b>         | <b>0.961</b>  |
| DPPH                                   | <b>-0.802</b> | <b>0.857</b>  | <b>0.975</b>  | <b>0.932</b>  | <b>1</b>      | <b>0.821</b>  | <b>0.919</b>  | <b>-0.494</b> | <b>0.462</b>  | <b>0.618</b>  | <b>0.758</b>  | <b>0.854</b>  | <b>0.931</b>     | <b>0.921</b>         | <b>0.970</b>  |
| FRAP                                   | <b>-0.743</b> | <b>0.790</b>  | <b>0.844</b>  | <b>0.916</b>  | <b>0.821</b>  | <b>1</b>      | <b>0.917</b>  | -0.131        | 0.080         | 0.257         | <b>0.501</b>  | <b>0.832</b>  | <b>0.940</b>     | <b>0.736</b>         | <b>0.870</b>  |
| ABTS                                   | <b>-0.723</b> | <b>0.777</b>  | <b>0.910</b>  | <b>0.961</b>  | <b>0.919</b>  | <b>0.917</b>  | <b>1</b>      | -0.168        | 0.112         | 0.301         | <b>0.504</b>  | <b>0.926</b>  | <b>0.966</b>     | <b>0.773</b>         | <b>0.938</b>  |
| L*                                     | <b>0.451</b>  | <b>-0.495</b> | -0.434        | -0.295        | <b>-0.494</b> | -0.131        | -0.168        | <b>1</b>      | <b>-0.893</b> | <b>-0.971</b> | <b>-0.747</b> | -0.102        | -0.232           | <b>-0.580</b>        | <b>-0.452</b> |
| a*                                     | -0.375        | 0.409         | <b>0.448</b>  | 0.227         | <b>0.462</b>  | 0.080         | 0.112         | <b>-0.893</b> | <b>1</b>      | <b>0.883</b>  | <b>0.822</b>  | 0.149         | 0.233            | <b>0.650</b>         | 0.376         |
| b*                                     | <b>-0.572</b> | <b>0.601</b>  | <b>0.563</b>  | 0.422         | <b>0.618</b>  | 0.257         | 0.301         | <b>-0.971</b> | <b>0.883</b>  | <b>1</b>      | <b>0.814</b>  | 0.250         | 0.359            | <b>0.692</b>         | <b>0.575</b>  |
| Quinic acid                            | <b>-0.602</b> | <b>0.617</b>  | <b>0.792</b>  | <b>0.635</b>  | <b>0.758</b>  | <b>0.501</b>  | <b>0.504</b>  | <b>-0.747</b> | <b>0.822</b>  | <b>0.814</b>  | <b>1</b>      | <b>0.466</b>  | <b>0.639</b>     | <b>0.925</b>         | <b>0.676</b>  |
| Gallic acid                            | <b>-0.590</b> | <b>0.664</b>  | <b>0.875</b>  | <b>0.890</b>  | <b>0.854</b>  | <b>0.832</b>  | <b>0.926</b>  | -0.102        | 0.149         | 0.250         | <b>0.466</b>  | <b>1</b>      | <b>0.899</b>     | <b>0.765</b>         | <b>0.877</b>  |
| Chlorogenic acid                       | <b>-0.739</b> | <b>0.794</b>  | <b>0.949</b>  | <b>0.970</b>  | <b>0.931</b>  | <b>0.940</b>  | <b>0.966</b>  | -0.232        | 0.233         | 0.359         | <b>0.639</b>  | <b>0.899</b>  | <b>1</b>         | <b>0.861</b>         | <b>0.934</b>  |
| Total phenolic acids                   | <b>-0.701</b> | <b>0.743</b>  | <b>0.954</b>  | <b>0.852</b>  | <b>0.921</b>  | <b>0.736</b>  | <b>0.773</b>  | <b>-0.580</b> | <b>0.650</b>  | <b>0.692</b>  | <b>0.925</b>  | <b>0.765</b>  | <b>0.861</b>     | <b>1</b>             | <b>0.873</b>  |
| Gallocatechin                          | <b>-0.806</b> | <b>0.869</b>  | <b>0.945</b>  | <b>0.961</b>  | <b>0.970</b>  | <b>0.870</b>  | <b>0.938</b>  | <b>-0.452</b> | 0.376         | <b>0.575</b>  | <b>0.676</b>  | <b>0.877</b>  | <b>0.934</b>     | <b>0.873</b>         | <b>1</b>      |
| Epigallocatechin                       | <b>-0.684</b> | <b>0.749</b>  | <b>0.909</b>  | <b>0.962</b>  | <b>0.900</b>  | <b>0.928</b>  | <b>0.992</b>  | -0.128        | 0.088         | 0.259         | <b>0.496</b>  | <b>0.931</b>  | <b>0.972</b>     | <b>0.770</b>         | <b>0.929</b>  |
| Procyanidin B1                         | <b>-0.713</b> | <b>0.766</b>  | <b>0.905</b>  | <b>0.981</b>  | <b>0.905</b>  | <b>0.886</b>  | <b>0.955</b>  | -0.270        | 0.179         | 0.405         | <b>0.575</b>  | <b>0.883</b>  | <b>0.941</b>     | <b>0.805</b>         | <b>0.959</b>  |
| Catechin                               | <b>-0.743</b> | <b>0.804</b>  | <b>0.958</b>  | <b>0.924</b>  | <b>0.975</b>  | <b>0.765</b>  | <b>0.894</b>  | <b>-0.524</b> | <b>0.476</b>  | <b>0.630</b>  | <b>0.758</b>  | <b>0.834</b>  | <b>0.894</b>     | <b>0.910</b>         | <b>0.965</b>  |
| Procyanidin B2                         | <b>-0.587</b> | <b>0.643</b>  | <b>0.621</b>  | <b>0.713</b>  | <b>0.603</b>  | <b>0.879</b>  | <b>0.722</b>  | -0.020        | -0.017        | 0.137         | 0.285         | <b>0.698</b>  | <b>0.742</b>     | <b>0.518</b>         | <b>0.664</b>  |
| Epicatechin                            | <b>-0.674</b> | <b>0.740</b>  | <b>0.729</b>  | <b>0.805</b>  | <b>0.779</b>  | <b>0.697</b>  | <b>0.807</b>  | -0.312        | 0.159         | 0.418         | 0.368         | <b>0.731</b>  | <b>0.766</b>     | <b>0.590</b>         | <b>0.851</b>  |
| Epigallocatechin gallate               | <b>-0.646</b> | <b>0.684</b>  | <b>0.910</b>  | <b>0.780</b>  | <b>0.862</b>  | <b>0.663</b>  | <b>0.679</b>  | <b>-0.635</b> | <b>0.711</b>  | <b>0.730</b>  | <b>0.963</b>  | <b>0.661</b>  | <b>0.796</b>     | <b>0.983</b>         | <b>0.801</b>  |
| Procyanidin B1 3-O-gallate             | <b>-0.469</b> | <b>0.576</b>  | <b>0.551</b>  | <b>0.670</b>  | <b>0.569</b>  | <b>0.665</b>  | <b>0.636</b>  | -0.261        | 0.068         | 0.269         | 0.281         | <b>0.523</b>  | <b>0.636</b>     | 0.443                | <b>0.684</b>  |
| Gallocatechin gallate                  | <b>-0.625</b> | <b>0.680</b>  | <b>0.763</b>  | <b>0.874</b>  | <b>0.772</b>  | <b>0.905</b>  | <b>0.955</b>  | 0.053         | -0.149        | 0.067         | 0.254         | <b>0.866</b>  | <b>0.884</b>     | <b>0.569</b>         | <b>0.831</b>  |
| Quercetin 3-O-di-galactoside/glucoside | <b>-0.692</b> | <b>0.767</b>  | <b>0.792</b>  | <b>0.872</b>  | <b>0.837</b>  | <b>0.842</b>  | <b>0.923</b>  | -0.199        | 0.054         | 0.306         | 0.351         | <b>0.828</b>  | <b>0.870</b>     | <b>0.623</b>         | <b>0.895</b>  |
| Myricetin 3-O-galactoside 1            | -0.347        | 0.380         | <b>0.484</b>  | <b>0.587</b>  | <b>0.527</b>  | 0.402         | <b>0.595</b>  | -0.142        | 0.013         | 0.206         | 0.232         | <b>0.540</b>  | <b>0.473</b>     | 0.398                | <b>0.603</b>  |
| Epicatechin gallate                    | <b>-0.671</b> | <b>0.745</b>  | <b>0.737</b>  | <b>0.816</b>  | <b>0.787</b>  | <b>0.711</b>  | <b>0.837</b>  | -0.308        | 0.153         | 0.403         | 0.345         | <b>0.778</b>  | <b>0.759</b>     | <b>0.589</b>         | <b>0.870</b>  |
| Rutin                                  | <b>-0.704</b> | <b>0.760</b>  | <b>0.776</b>  | <b>0.818</b>  | <b>0.825</b>  | <b>0.671</b>  | <b>0.801</b>  | <b>-0.460</b> | 0.310         | <b>0.519</b>  | <b>0.513</b>  | <b>0.682</b>  | <b>0.768</b>     | <b>0.674</b>         | <b>0.878</b>  |
| Quercetin 3-O-galactoside              | <b>-0.558</b> | <b>0.600</b>  | 0.417         | <b>0.494</b>  | <b>0.527</b>  | 0.397         | <b>0.520</b>  | -0.330        | 0.121         | 0.359         | 0.186         | 0.372         | 0.412            | 0.301                | <b>0.608</b>  |

|                                  |               |               |               |               |               |               |               |               |               |               |               |               |               |               |               |
|----------------------------------|---------------|---------------|---------------|---------------|---------------|---------------|---------------|---------------|---------------|---------------|---------------|---------------|---------------|---------------|---------------|
| Kaempferol 3-O-rutinoside 2      | <b>-0.482</b> | <b>0.527</b>  | <b>0.491</b>  | <b>0.636</b>  | <b>0.562</b>  | <b>0.506</b>  | <b>0.665</b>  | -0.198        | 0.000         | 0.275         | 0.141         | <b>0.604</b>  | <b>0.533</b>  | 0.363         | <b>0.688</b>  |
| Kaempferol 3-O-glucoside         | -0.341        | 0.416         | 0.221         | 0.293         | 0.331         | 0.139         | 0.249         | <b>-0.486</b> | 0.328         | <b>0.466</b>  | 0.164         | 0.229         | 0.189         | 0.213         | 0.432         |
| Unknown quercetin conjugate      | <b>-0.611</b> | <b>0.666</b>  | <b>0.817</b>  | <b>0.921</b>  | <b>0.826</b>  | <b>0.809</b>  | <b>0.910</b>  | -0.200        | 0.086         | 0.333         | <b>0.450</b>  | <b>0.872</b>  | <b>0.849</b>  | <b>0.704</b>  | <b>0.899</b>  |
| Unknown kaempferol conjugate     | <b>-0.624</b> | <b>0.668</b>  | <b>0.840</b>  | <b>0.870</b>  | <b>0.852</b>  | <b>0.658</b>  | <b>0.831</b>  | -0.406        | 0.284         | <b>0.517</b>  | <b>0.570</b>  | <b>0.766</b>  | <b>0.789</b>  | <b>0.745</b>  | <b>0.890</b>  |
| Total flavonoids                 | <b>-0.760</b> | <b>0.824</b>  | <b>0.964</b>  | <b>0.958</b>  | <b>0.979</b>  | <b>0.835</b>  | <b>0.941</b>  | <b>-0.445</b> | 0.388         | <b>0.560</b>  | <b>0.703</b>  | <b>0.877</b>  | <b>0.935</b>  | <b>0.892</b>  | <b>0.986</b>  |
| Caffeine                         | <b>-0.668</b> | <b>0.729</b>  | <b>0.752</b>  | <b>0.860</b>  | <b>0.756</b>  | <b>0.962</b>  | <b>0.911</b>  | 0.015         | -0.085        | 0.095         | 0.314         | <b>0.819</b>  | <b>0.902</b>  | <b>0.597</b>  | <b>0.807</b>  |
| Ethoxyacetic acid                | -0.226        | 0.220         | 0.167         | 0.333         | 0.186         | 0.260         | 0.352         | 0.257         | -0.383        | -0.229        | -0.207        | 0.303         | 0.302         | -0.008        | 0.272         |
| Acetic acid                      | -0.054        | 0.059         | 0.276         | 0.288         | 0.256         | 0.068         | 0.225         | -0.300        | 0.218         | 0.253         | 0.309         | 0.233         | 0.198         | 0.317         | 0.279         |
| Pterin-6-carboxylic acid         | <b>-0.567</b> | <b>0.614</b>  | <b>0.856</b>  | <b>0.724</b>  | <b>0.827</b>  | <b>0.569</b>  | <b>0.673</b>  | <b>-0.597</b> | <b>0.643</b>  | <b>0.644</b>  | <b>0.866</b>  | <b>0.618</b>  | <b>0.739</b>  | <b>0.895</b>  | <b>0.762</b>  |
| Hexanoic acid                    | -0.005        | -0.004        | -0.316        | -0.395        | -0.275        | -0.354        | -0.359        | -0.009        | 0.038         | -0.065        | -0.159        | -0.400        | -0.327        | -0.284        | -0.343        |
| Octanoic acid                    | <b>0.507</b>  | <b>-0.540</b> | <b>-0.668</b> | <b>-0.606</b> | <b>-0.687</b> | <b>-0.531</b> | <b>-0.533</b> | <b>0.696</b>  | <b>-0.591</b> | <b>-0.756</b> | <b>-0.726</b> | <b>-0.458</b> | <b>-0.543</b> | <b>-0.721</b> | <b>-0.685</b> |
| Nonanoic acid                    | <b>0.459</b>  | <b>-0.467</b> | <b>-0.539</b> | -0.442        | <b>-0.549</b> | -0.389        | -0.350        | <b>0.708</b>  | <b>-0.629</b> | <b>-0.779</b> | <b>-0.702</b> | -0.332        | -0.377        | <b>-0.644</b> | <b>-0.510</b> |
| Total acid                       | 0.433         | <b>-0.459</b> | <b>-0.632</b> | <b>-0.589</b> | <b>-0.638</b> | <b>-0.518</b> | <b>-0.513</b> | <b>0.611</b>  | <b>-0.517</b> | <b>-0.683</b> | <b>-0.669</b> | <b>-0.469</b> | <b>-0.517</b> | <b>-0.683</b> | <b>-0.643</b> |
| 2-Methyl-1-propanol              | -0.361        | 0.400         | 0.379         | 0.329         | 0.400         | 0.188         | 0.342         | -0.304        | 0.262         | 0.281         | 0.304         | 0.267         | 0.340         | 0.340         | 0.367         |
| 2-Pentanol                       | -0.381        | 0.389         | 0.246         | 0.394         | 0.281         | <b>0.555</b>  | <b>0.450</b>  | 0.304         | <b>-0.472</b> | -0.200        | -0.145        | 0.338         | 0.406         | 0.058         | 0.314         |
| 1-Butanol                        | -0.183        | 0.179         | 0.368         | 0.418         | 0.394         | 0.198         | <b>0.474</b>  | -0.079        | -0.039        | 0.095         | 0.144         | 0.372         | 0.337         | 0.264         | 0.379         |
| 2-Hexanol                        | -0.184        | 0.198         | 0.308         | 0.388         | 0.347         | 0.158         | 0.394         | -0.178        | -0.007        | 0.156         | 0.127         | 0.273         | 0.290         | 0.214         | 0.339         |
| 3-Methyl-1-butanol               | -0.145        | 0.180         | 0.105         | 0.011         | 0.120         | -0.065        | 0.023         | -0.307        | 0.288         | 0.230         | 0.187         | -0.019        | 0.042         | 0.128         | 0.070         |
| 1-(2-Aminoethylamino)-2-propanol | <b>-0.680</b> | <b>0.748</b>  | <b>0.873</b>  | <b>0.902</b>  | <b>0.866</b>  | <b>0.891</b>  | <b>0.925</b>  | -0.207        | 0.124         | 0.308         | <b>0.514</b>  | <b>0.802</b>  | <b>0.921</b>  | <b>0.732</b>  | <b>0.882</b>  |
| 2-Octen-4-ol                     | <b>-0.718</b> | <b>0.776</b>  | <b>0.916</b>  | <b>0.950</b>  | <b>0.910</b>  | <b>0.898</b>  | <b>0.974</b>  | -0.201        | 0.138         | 0.315         | <b>0.539</b>  | <b>0.875</b>  | <b>0.956</b>  | <b>0.778</b>  | <b>0.924</b>  |
| 3-Methyl-1-pentanol              | -0.133        | 0.154         | -0.091        | -0.128        | -0.031        | -0.198        | -0.147        | -0.293        | 0.219         | 0.185         | 0.058         | -0.254        | -0.123        | -0.060        | -0.055        |
| (E)-3-Hexen-1-ol                 | -0.176        | 0.171         | 0.089         | 0.271         | 0.051         | 0.307         | 0.171         | 0.264         | -0.280        | -0.226        | -0.051        | 0.143         | 0.195         | 0.034         | 0.102         |
| 1-Hexanol                        | -0.418        | 0.399         | 0.084         | 0.251         | 0.144         | 0.331         | 0.256         | 0.189         | -0.393        | -0.086        | -0.226        | 0.150         | 0.209         | -0.084        | 0.213         |
| 2-Methyl-4-heptanol              | -0.201        | 0.286         | -0.003        | 0.166         | 0.063         | 0.183         | 0.131         | -0.039        | -0.100        | 0.037         | -0.183        | 0.118         | 0.107         | -0.076        | 0.211         |
| 2-Ethyl-1-hexanol                | -0.201        | 0.225         | 0.372         | 0.157         | 0.341         | 0.035         | 0.076         | <b>-0.691</b> | <b>0.775</b>  | <b>0.645</b>  | <b>0.731</b>  | 0.057         | 0.171         | <b>0.547</b>  | 0.234         |
| Linalool                         | <b>-0.687</b> | <b>0.745</b>  | <b>0.944</b>  | <b>0.829</b>  | <b>0.937</b>  | <b>0.670</b>  | <b>0.786</b>  | <b>-0.577</b> | <b>0.615</b>  | <b>0.670</b>  | <b>0.851</b>  | <b>0.759</b>  | <b>0.841</b>  | <b>0.944</b>  | <b>0.877</b>  |
| 1-Octanol                        | <b>0.551</b>  | <b>-0.541</b> | <b>-0.598</b> | <b>-0.607</b> | <b>-0.621</b> | <b>-0.592</b> | <b>-0.575</b> | 0.338         | -0.286        | <b>-0.474</b> | <b>-0.475</b> | <b>-0.564</b> | <b>-0.560</b> | <b>-0.585</b> | <b>-0.642</b> |
| 2,3-Butanediol                   | -0.147        | 0.113         | 0.133         | 0.130         | 0.139         | 0.007         | 0.075         | -0.325        | 0.234         | 0.279         | 0.240         | 0.079         | 0.057         | 0.201         | 0.177         |
| Phenylethyl alcohol              | 0.220         | -0.214        | -0.305        | -0.419        | -0.303        | -0.442        | -0.400        | -0.102        | 0.172         | -0.027        | -0.074        | -0.391        | -0.357        | -0.224        | -0.366        |
| Total alcohol                    | -0.141        | 0.167         | 0.114         | 0.051         | 0.137         | -0.060        | 0.077         | -0.248        | 0.197         | 0.172         | 0.137         | 0.008         | 0.064         | 0.105         | 0.088         |
| 3-Hydroxybutanal                 | -0.134        | 0.178         | 0.192         | 0.142         | 0.243         | 0.097         | 0.175         | -0.286        | 0.169         | 0.275         | 0.157         | 0.056         | 0.149         | 0.145         | 0.222         |
| Octanal                          | 0.101         | -0.089        | 0.232         | 0.321         | 0.143         | 0.250         | 0.284         | 0.287         | -0.226        | -0.288        | 0.015         | 0.371         | 0.320         | 0.172         | 0.195         |
| Total aldehyde                   | 0.099         | -0.087        | 0.233         | 0.323         | 0.145         | 0.251         | 0.285         | 0.285         | -0.224        | -0.287        | 0.017         | 0.372         | 0.322         | 0.174         | 0.197         |

|                                         |               |               |               |               |               |               |               |               |               |               |               |               |               |               |               |
|-----------------------------------------|---------------|---------------|---------------|---------------|---------------|---------------|---------------|---------------|---------------|---------------|---------------|---------------|---------------|---------------|---------------|
| Benzaldehyde                            | 0.253         | -0.216        | -0.240        | -0.371        | -0.199        | -0.338        | -0.324        | -0.276        | 0.229         | 0.198         | 0.004         | -0.362        | -0.366        | -0.161        | -0.262        |
| Myristicin                              | 0.426         | -0.438        | -0.354        | <b>-0.557</b> | -0.400        | <b>-0.502</b> | <b>-0.513</b> | -0.002        | 0.225         | -0.088        | -0.001        | <b>-0.455</b> | -0.432        | -0.203        | <b>-0.539</b> |
| Benzeneacetaldehyde                     | -0.330        | 0.416         | 0.396         | 0.368         | <b>0.482</b>  | 0.214         | 0.374         | <b>-0.606</b> | 0.423         | <b>0.561</b>  | 0.324         | 0.297         | 0.277         | 0.358         | <b>0.454</b>  |
| Naphthalene                             | <b>-0.815</b> | <b>0.869</b>  | <b>0.928</b>  | <b>0.887</b>  | <b>0.964</b>  | <b>0.772</b>  | <b>0.842</b>  | <b>-0.636</b> | <b>0.547</b>  | <b>0.734</b>  | <b>0.803</b>  | <b>0.753</b>  | <b>0.852</b>  | <b>0.909</b>  | <b>0.939</b>  |
| 1,2-Dihydro-1,1,6-trimethyl-naphthalene | <b>-0.815</b> | <b>0.869</b>  | <b>0.928</b>  | <b>0.887</b>  | <b>0.964</b>  | <b>0.772</b>  | <b>0.842</b>  | <b>-0.636</b> | <b>0.547</b>  | <b>0.734</b>  | <b>0.803</b>  | <b>0.753</b>  | <b>0.852</b>  | <b>0.909</b>  | <b>0.939</b>  |
| Benzyl alcohol                          | -0.298        | 0.273         | 0.021         | 0.134         | 0.065         | 0.231         | 0.160         | 0.187         | -0.290        | -0.071        | -0.229        | 0.127         | 0.108         | -0.105        | 0.134         |
| Total benzenoid                         | -0.289        | 0.276         | 0.002         | 0.079         | 0.063         | 0.178         | 0.121         | 0.086         | -0.203        | 0.016         | -0.208        | 0.076         | 0.054         | -0.113        | 0.109         |
| Ethyl butanoate                         | -0.387        | 0.380         | 0.176         | 0.342         | 0.226         | 0.299         | 0.361         | 0.166         | -0.340        | -0.110        | -0.168        | 0.236         | 0.309         | -0.003        | 0.292         |
| Ethyl 3-methylbutanoate                 | -0.195        | 0.139         | -0.105        | 0.010         | -0.058        | 0.001         | 0.038         | 0.252         | -0.316        | -0.262        | -0.272        | -0.048        | 0.029         | -0.204        | -0.028        |
| 3-Methylbutyl acetate                   | -0.342        | 0.333         | 0.117         | 0.320         | 0.169         | 0.326         | 0.342         | 0.281         | <b>-0.453</b> | -0.196        | -0.282        | 0.275         | 0.264         | -0.074        | 0.272         |
| 3-Hydroxymandelic acid ethyl ester      | 0.016         | -0.006        | 0.004         | 0.215         | 0.008         | 0.104         | 0.167         | 0.219         | -0.340        | -0.257        | -0.255        | 0.199         | 0.110         | -0.097        | 0.149         |
| Ethyl hexanoate                         | 0.116         | -0.130        | -0.188        | -0.087        | -0.204        | -0.107        | -0.049        | 0.442         | <b>-0.469</b> | <b>-0.449</b> | -0.388        | -0.109        | -0.049        | -0.313        | -0.192        |
| Hexyl acetate                           | -0.209        | 0.186         | -0.013        | 0.180         | 0.020         | 0.204         | 0.206         | 0.424         | <b>-0.529</b> | -0.351        | -0.379        | 0.175         | 0.141         | -0.189        | 0.109         |
| Ethyl (E)-3-hexenoate                   | <b>-0.464</b> | <b>0.502</b>  | 0.170         | 0.318         | 0.253         | 0.245         | 0.289         | -0.202        | -0.023        | 0.174         | -0.009        | 0.231         | 0.211         | 0.096         | 0.350         |
| Ethyl lactate                           | 0.256         | -0.258        | -0.137        | -0.214        | -0.171        | -0.275        | -0.202        | -0.075        | 0.102         | -0.040        | 0.006         | -0.189        | -0.186        | -0.081        | -0.211        |
| Propyl hexanoate                        | 0.105         | -0.089        | -0.036        | 0.020         | -0.064        | -0.078        | 0.024         | 0.253         | -0.255        | -0.305        | -0.167        | -0.035        | 0.051         | -0.124        | -0.060        |
| Ethyl octanoate                         | <b>0.571</b>  | <b>-0.607</b> | <b>-0.514</b> | -0.420        | <b>-0.578</b> | -0.403        | -0.373        | <b>0.724</b>  | <b>-0.629</b> | <b>-0.777</b> | <b>-0.648</b> | -0.285        | -0.380        | <b>-0.590</b> | <b>-0.546</b> |
| Ethyl 3-hydroxybutanoate                | <b>0.660</b>  | <b>-0.621</b> | <b>-0.574</b> | <b>-0.619</b> | <b>-0.590</b> | <b>-0.526</b> | <b>-0.531</b> | 0.350         | -0.274        | <b>-0.455</b> | <b>-0.487</b> | <b>-0.483</b> | <b>-0.526</b> | <b>-0.561</b> | <b>-0.649</b> |
| Ethyl nonanoate                         | 0.112         | -0.139        | -0.264        | -0.125        | -0.244        | -0.185        | -0.128        | 0.335         | <b>-0.464</b> | -0.338        | <b>-0.453</b> | -0.162        | -0.167        | -0.390        | -0.184        |
| Isoamyl lactate                         | -0.174        | 0.178         | 0.226         | 0.183         | 0.230         | 0.021         | 0.105         | <b>-0.491</b> | 0.405         | 0.402         | 0.419         | 0.032         | 0.119         | 0.316         | 0.227         |
| Methyl decanoate                        | 0.253         | -0.210        | -0.278        | -0.147        | -0.236        | -0.157        | -0.081        | 0.341         | <b>-0.519</b> | -0.434        | <b>-0.494</b> | -0.248        | -0.142        | <b>-0.446</b> | -0.174        |
| Ethyl 2-furancarboxylate                | <b>0.470</b>  | <b>-0.453</b> | -0.367        | <b>-0.461</b> | -0.410        | -0.421        | -0.431        | 0.082         | 0.012         | -0.195        | -0.144        | -0.437        | -0.394        | -0.293        | <b>-0.473</b> |
| Ethyl decanoate                         | 0.439         | <b>-0.499</b> | <b>-0.470</b> | -0.387        | <b>-0.524</b> | -0.325        | -0.319        | <b>0.783</b>  | <b>-0.578</b> | <b>-0.799</b> | <b>-0.630</b> | -0.173        | -0.329        | <b>-0.533</b> | <b>-0.491</b> |
| Diethyl succinate                       | 0.391         | -0.383        | -0.253        | <b>-0.479</b> | -0.291        | <b>-0.449</b> | -0.421        | -0.127        | 0.308         | 0.046         | 0.057         | -0.346        | -0.368        | -0.119        | -0.403        |
| Ethyl 9-decenoate                       | 0.413         | <b>-0.481</b> | <b>-0.457</b> | -0.444        | <b>-0.496</b> | -0.374        | -0.349        | <b>0.656</b>  | -0.409        | <b>-0.678</b> | <b>-0.549</b> | -0.165        | -0.346        | <b>-0.476</b> | <b>-0.486</b> |
| Ethyl benzeneacetate                    | <b>-0.470</b> | <b>0.459</b>  | 0.373         | 0.165         | 0.412         | 0.105         | 0.105         | <b>-0.785</b> | <b>0.843</b>  | <b>0.785</b>  | <b>0.716</b>  | 0.092         | 0.168         | <b>0.549</b>  | 0.307         |
| 2-Phenethyl acetate                     | 0.126         | -0.129        | -0.153        | -0.245        | -0.094        | -0.283        | -0.136        | -0.083        | 0.045         | 0.051         | -0.157        | -0.116        | -0.193        | -0.170        | -0.101        |
| Ethyl dodecanoate                       | 0.173         | -0.078        | -0.124        | -0.076        | -0.162        | -0.041        | -0.057        | 0.222         | -0.286        | -0.269        | -0.247        | -0.144        | -0.071        | -0.229        | -0.106        |
| Total ester                             | 0.049         | -0.042        | -0.029        | 0.179         | -0.028        | 0.072         | 0.138         | 0.255         | -0.364        | -0.295        | -0.288        | 0.175         | 0.082         | -0.132        | 0.110         |
| 3-Hydroxy-2-butanone                    | 0.195         | -0.185        | -0.247        | -0.239        | -0.280        | -0.203        | -0.183        | 0.405         | -0.227        | -0.417        | -0.305        | -0.094        | -0.187        | -0.265        | -0.259        |
| Limonene                                | <b>-0.768</b> | <b>0.823</b>  | <b>0.847</b>  | <b>0.811</b>  | <b>0.893</b>  | <b>0.692</b>  | <b>0.746</b>  | <b>-0.700</b> | <b>0.549</b>  | <b>0.777</b>  | <b>0.780</b>  | <b>0.629</b>  | <b>0.751</b>  | <b>0.841</b>  | <b>0.865</b>  |
| Terpinolene                             | <b>-0.626</b> | <b>0.693</b>  | <b>0.746</b>  | <b>0.794</b>  | <b>0.742</b>  | <b>0.873</b>  | <b>0.838</b>  | -0.083        | 0.001         | 0.171         | 0.369         | <b>0.704</b>  | <b>0.843</b>  | <b>0.589</b>  | <b>0.755</b>  |

|               |               |              |              |              |              |              |              |               |              |              |              |              |              |              |              |
|---------------|---------------|--------------|--------------|--------------|--------------|--------------|--------------|---------------|--------------|--------------|--------------|--------------|--------------|--------------|--------------|
| Total terpene | <b>-0.809</b> | <b>0.868</b> | <b>0.895</b> | <b>0.878</b> | <b>0.932</b> | <b>0.794</b> | <b>0.830</b> | <b>-0.607</b> | <b>0.465</b> | <b>0.694</b> | <b>0.749</b> | <b>0.704</b> | <b>0.839</b> | <b>0.854</b> | <b>0.912</b> |
|---------------|---------------|--------------|--------------|--------------|--------------|--------------|--------------|---------------|--------------|--------------|--------------|--------------|--------------|--------------|--------------|

---

Values in **bold** indicate significant ( $p < 0.05$ ) correlation

**Table S6** Correlation matrix of quantified phenolic and volatile compounds, physicochemical properties and tested responses of tea-macerated Chardonnay wines

(continued 2/7)

| Variables                              | Epigallocatechin | Procyanidin B1 | Catechin | Procyanidin B2 | Epicatechin | Epigallocatechin gallate | Procyanidin B1 3-O-gallate | Gallocatechin gallate | Quercetin 3-O-di-galactoside/glucoside | Myricetin 3-O-galactoside 1 | Epicatechin gallate | Rutin | Quercetin 3-O-galactoside | Kaempferol 3-O-rutinoside 2 | Kaempferol 3-O-glucoside |
|----------------------------------------|------------------|----------------|----------|----------------|-------------|--------------------------|----------------------------|-----------------------|----------------------------------------|-----------------------------|---------------------|-------|---------------------------|-----------------------------|--------------------------|
| TA                                     | -0.684           | -0.713         | -0.743   | -0.587         | -0.674      | -0.646                   | -0.469                     | -0.625                | -0.692                                 | -0.347                      | -0.671              | -     | -0.558                    | -0.482                      | -0.341                   |
| pH                                     | 0.749            | 0.766          | 0.804    | 0.643          | 0.740       | 0.684                    | 0.576                      | 0.680                 | 0.767                                  | 0.380                       | 0.745               | 0.704 | 0.600                     | 0.527                       | 0.416                    |
| TPC                                    | 0.909            | 0.905          | 0.958    | 0.621          | 0.729       | 0.910                    | 0.551                      | 0.763                 | 0.792                                  | 0.484                       | 0.737               | 0.776 | 0.417                     | 0.491                       | 0.221                    |
| TFC                                    | 0.962            | 0.981          | 0.924    | 0.713          | 0.805       | 0.780                    | 0.670                      | 0.874                 | 0.872                                  | 0.587                       | 0.816               | 0.818 | 0.494                     | 0.636                       | 0.293                    |
| DPPH                                   | 0.900            | 0.905          | 0.975    | 0.603          | 0.779       | 0.862                    | 0.569                      | 0.772                 | 0.837                                  | 0.527                       | 0.787               | 0.825 | 0.527                     | 0.562                       | 0.331                    |
| FRAP                                   | 0.928            | 0.886          | 0.765    | 0.879          | 0.697       | 0.663                    | 0.665                      | 0.905                 | 0.842                                  | 0.402                       | 0.711               | 0.671 | 0.397                     | 0.506                       | 0.139                    |
| ABTS                                   | 0.992            | 0.955          | 0.894    | 0.722          | 0.807       | 0.679                    | 0.636                      | 0.955                 | 0.923                                  | 0.595                       | 0.837               | 0.801 | 0.520                     | 0.665                       | 0.249                    |
| L*                                     | -0.128           | -0.270         | -0.524   | -0.020         | -0.312      | -0.635                   | -0.261                     | 0.053                 | -0.199                                 | -0.142                      | -0.308              | -     | -0.330                    | -0.198                      | -0.486                   |
| a*                                     | 0.088            | 0.179          | 0.476    | -0.017         | 0.159       | 0.711                    | 0.068                      | -0.149                | 0.054                                  | 0.013                       | 0.153               | 0.460 | 0.310                     | 0.121                       | 0.000                    |
| b*                                     | 0.259            | 0.405          | 0.630    | 0.137          | 0.418       | 0.730                    | 0.269                      | 0.067                 | 0.306                                  | 0.206                       | 0.403               | 0.519 | 0.359                     | 0.275                       | 0.466                    |
| Quinic acid                            | 0.496            | 0.575          | 0.758    | 0.285          | 0.368       | 0.963                    | 0.281                      | 0.254                 | 0.351                                  | 0.232                       | 0.345               | 0.513 | 0.186                     | 0.141                       | 0.164                    |
| Gallic acid                            | 0.931            | 0.883          | 0.834    | 0.698          | 0.731       | 0.661                    | 0.523                      | 0.866                 | 0.828                                  | 0.540                       | 0.778               | 0.682 | 0.372                     | 0.604                       | 0.229                    |
| Chlorogenic acid                       | 0.972            | 0.941          | 0.894    | 0.742          | 0.766       | 0.796                    | 0.636                      | 0.884                 | 0.870                                  | 0.473                       | 0.759               | 0.768 | 0.412                     | 0.533                       | 0.189                    |
| Total phenolic acids                   | 0.770            | 0.805          | 0.910    | 0.518          | 0.590       | 0.983                    | 0.443                      | 0.569                 | 0.623                                  | 0.398                       | 0.589               | 0.674 | 0.301                     | 0.363                       | 0.213                    |
| Gallocatechin                          | 0.929            | 0.959          | 0.965    | 0.664          | 0.851       | 0.801                    | 0.684                      | 0.831                 | 0.895                                  | 0.603                       | 0.870               | 0.878 | 0.608                     | 0.688                       | 0.432                    |
| Epigallocatechin                       | 1                | 0.955          | 0.884    | 0.722          | 0.800       | 0.679                    | 0.675                      | 0.956                 | 0.919                                  | 0.583                       | 0.831               | 0.798 | 0.499                     | 0.645                       | 0.236                    |
| Procyanidin B1                         | 0.955            | 1              | 0.912    | 0.676          | 0.845       | 0.729                    | 0.680                      | 0.882                 | 0.893                                  | 0.661                       | 0.849               | 0.834 | 0.550                     | 0.728                       | 0.348                    |
| Catechin                               | 0.884            | 0.912          | 1        | 0.487          | 0.780       | 0.853                    | 0.615                      | 0.748                 | 0.814                                  | 0.644                       | 0.820               | 0.882 | 0.600                     | 0.634                       | 0.411                    |
| Procyanidin B2                         | 0.722            | 0.676          | 0.487    | 1              | 0.534       | 0.449                    | 0.475                      | 0.744                 | 0.669                                  | 0.165                       | 0.526               | 0.386 | 0.206                     | 0.362                       | 0.084                    |
| Epicatechin                            | 0.800            | 0.845          | 0.780    | 0.534          | 1           | 0.532                    | 0.719                      | 0.757                 | 0.926                                  | 0.450                       | 0.944               | 0.888 | 0.583                     | 0.763                       | 0.507                    |
| Epigallocatechin gallate               | 0.679            | 0.729          | 0.853    | 0.449          | 0.532       | 1                        | 0.407                      | 0.458                 | 0.538                                  | 0.298                       | 0.509               | 0.622 | 0.221                     | 0.273                       | 0.178                    |
| Procyanidin B1 3-O-gallate             | 0.675            | 0.680          | 0.615    | 0.475          | 0.719       | 0.407                    | 1                          | 0.664                 | 0.790                                  | 0.459                       | 0.782               | 0.804 | 0.554                     | 0.686                       | 0.619                    |
| Gallocatechin gallate                  | 0.956            | 0.882          | 0.748    | 0.744          | 0.757       | 0.458                    | 0.664                      | 1                     | 0.915                                  | 0.582                       | 0.809               | 0.729 | 0.530                     | 0.677                       | 0.202                    |
| Quercetin 3-O-di-galactoside/glucoside | 0.919            | 0.893          | 0.814    | 0.669          | 0.926       | 0.538                    | 0.790                      | 0.915                 | 1                                      | 0.508                       | 0.927               | 0.870 | 0.581                     | 0.755                       | 0.425                    |
| Myricetin 3-O-galactoside 1            | 0.583            | 0.661          | 0.644    | 0.165          | 0.450       | 0.298                    | 0.459                      | 0.582                 | 0.508                                  | 1                           | 0.613               | 0.639 | 0.765                     | 0.794                       | 0.545                    |
| Epicatechin gallate                    | 0.831            | 0.849          | 0.820    | 0.526          | 0.944       | 0.509                    | 0.782                      | 0.809                 | 0.927                                  | 0.613                       | 1                   | 0.929 | 0.690                     | 0.870                       | 0.623                    |



|                                  |               |               |               |               |               |               |               |               |               |              |               |              |              |              |              |
|----------------------------------|---------------|---------------|---------------|---------------|---------------|---------------|---------------|---------------|---------------|--------------|---------------|--------------|--------------|--------------|--------------|
| Rutin                            | <b>0.798</b>  | <b>0.834</b>  | <b>0.882</b>  | 0.386         | <b>0.888</b>  | <b>0.622</b>  | <b>0.804</b>  | <b>0.729</b>  | <b>0.870</b>  | <b>0.639</b> | <b>0.929</b>  | <b>1</b>     | <b>0.754</b> | <b>0.782</b> | <b>0.624</b> |
| Quercetin 3-O-galactoside        | <b>0.499</b>  | <b>0.550</b>  | <b>0.600</b>  | 0.206         | <b>0.583</b>  | 0.221         | <b>0.554</b>  | <b>0.530</b>  | <b>0.581</b>  | <b>0.765</b> | <b>0.690</b>  | <b>0.754</b> | <b>1</b>     | <b>0.710</b> | <b>0.664</b> |
| Kaempferol 3-O-rutinoside 2      | <b>0.645</b>  | <b>0.728</b>  | <b>0.634</b>  | 0.362         | <b>0.763</b>  | 0.273         | <b>0.686</b>  | <b>0.677</b>  | <b>0.755</b>  | <b>0.794</b> | <b>0.870</b>  | <b>0.782</b> | <b>0.710</b> | <b>1</b>     | <b>0.749</b> |
| Kaempferol 3-O-glucoside         | 0.236         | 0.348         | 0.411         | 0.084         | <b>0.507</b>  | 0.178         | <b>0.619</b>  | 0.202         | 0.425         | <b>0.545</b> | <b>0.623</b>  | <b>0.624</b> | <b>0.664</b> | <b>0.749</b> | <b>1</b>     |
| Unknown quercetin conjugate      | <b>0.902</b>  | <b>0.959</b>  | <b>0.850</b>  | <b>0.646</b>  | <b>0.775</b>  | <b>0.611</b>  | <b>0.649</b>  | <b>0.862</b>  | <b>0.842</b>  | <b>0.784</b> | <b>0.836</b>  | <b>0.777</b> | <b>0.582</b> | <b>0.826</b> | 0.441        |
| Unknown kaempferol conjugate     | <b>0.823</b>  | <b>0.903</b>  | <b>0.912</b>  | 0.393         | <b>0.869</b>  | <b>0.698</b>  | <b>0.640</b>  | <b>0.721</b>  | <b>0.818</b>  | <b>0.704</b> | <b>0.889</b>  | <b>0.910</b> | <b>0.628</b> | <b>0.781</b> | <b>0.495</b> |
| Total flavonoids                 | <b>0.934</b>  | <b>0.950</b>  | <b>0.991</b>  | <b>0.579</b>  | <b>0.818</b>  | <b>0.824</b>  | <b>0.661</b>  | <b>0.823</b>  | <b>0.871</b>  | <b>0.639</b> | <b>0.854</b>  | <b>0.888</b> | <b>0.599</b> | <b>0.666</b> | 0.396        |
| Caffeine                         | <b>0.919</b>  | <b>0.836</b>  | <b>0.685</b>  | <b>0.865</b>  | <b>0.708</b>  | <b>0.504</b>  | <b>0.680</b>  | <b>0.946</b>  | <b>0.884</b>  | 0.368        | <b>0.715</b>  | <b>0.642</b> | 0.382        | <b>0.523</b> | 0.135        |
| Ethoxyacetic acid                | 0.360         | 0.377         | 0.211         | 0.170         | <b>0.551</b>  | -0.044        | 0.385         | 0.433         | <b>0.475</b>  | 0.283        | <b>0.487</b>  | <b>0.467</b> | 0.394        | 0.438        | 0.211        |
| Acetic acid                      | 0.228         | 0.312         | 0.414         | -0.245        | 0.165         | 0.309         | 0.272         | 0.164         | 0.156         | <b>0.565</b> | 0.281         | 0.411        | 0.296        | 0.366        | 0.251        |
| Pterin-6-carboxylic acid         | <b>0.678</b>  | <b>0.682</b>  | <b>0.881</b>  | 0.217         | <b>0.501</b>  | <b>0.895</b>  | <b>0.491</b>  | <b>0.491</b>  | <b>0.549</b>  | <b>0.471</b> | <b>0.561</b>  | <b>0.727</b> | 0.392        | 0.356        | 0.255        |
| Hexanoic acid                    | -0.370        | -0.420        | -0.286        | -0.407        | -0.198        | -0.237        | -0.299        | -0.343        | -0.303        | -0.378       | -0.266        | -            | -0.047       | -0.393       | -0.209       |
| Octanoic acid                    | <b>-0.515</b> | <b>-0.588</b> | <b>-0.706</b> | -0.392        | -0.396        | <b>-0.700</b> | <b>-0.446</b> | -0.390        | <b>-0.461</b> | -0.435       | <b>-0.481</b> | -            | -0.381       | -0.415       | -0.376       |
| Nonanoic acid                    | -0.314        | -0.404        | <b>-0.524</b> | -0.364        | -0.219        | <b>-0.646</b> | -0.186        | -0.182        | -0.252        | -0.198       | -0.279        | -            | -0.119       | -0.218       | -0.216       |
| Total acid                       | <b>-0.496</b> | <b>-0.575</b> | <b>-0.647</b> | -0.435        | -0.355        | <b>-0.657</b> | -0.405        | -0.378        | -0.431        | -0.419       | -0.441        | -            | -0.289       | -0.414       | -0.345       |
| 2-Methyl-1-propanol              | 0.333         | 0.330         | <b>0.470</b>  | -0.094        | 0.427         | 0.345         | 0.273         | 0.283         | 0.343         | 0.314        | 0.440         | <b>0.554</b> | <b>0.460</b> | 0.286        | 0.206        |
| 2-Pentanol                       | <b>0.445</b>  | 0.378         | 0.152         | <b>0.660</b>  | 0.342         | -0.003        | 0.394         | <b>0.562</b>  | <b>0.515</b>  | 0.099        | 0.319         | 0.193        | 0.192        | 0.264        | 0.028        |
| 1-Butanol                        | 0.429         | <b>0.458</b>  | <b>0.486</b>  | -0.016        | 0.318         | 0.208         | 0.181         | <b>0.452</b>  | 0.356         | <b>0.754</b> | 0.442         | <b>0.497</b> | <b>0.495</b> | <b>0.594</b> | 0.261        |
| 2-Hexanol                        | 0.344         | 0.412         | 0.418         | 0.020         | 0.363         | 0.182         | 0.204         | 0.362         | 0.338         | <b>0.601</b> | 0.413         | <b>0.496</b> | <b>0.469</b> | <b>0.519</b> | 0.287        |
| 3-Methyl-1-butanol               | 0.019         | -0.006        | 0.187         | -0.293        | 0.124         | 0.158         | 0.073         | -0.017        | 0.044         | 0.026        | 0.136         | 0.262        | 0.221        | -0.019       | 0.038        |
| 1-(2-Aminoethylamino)-2-propanol | <b>0.938</b>  | <b>0.876</b>  | <b>0.852</b>  | <b>0.650</b>  | <b>0.791</b>  | <b>0.674</b>  | <b>0.718</b>  | <b>0.891</b>  | <b>0.893</b>  | <b>0.449</b> | <b>0.804</b>  | <b>0.809</b> | <b>0.481</b> | <b>0.540</b> | 0.199        |
| 2-Octen-4-ol                     | <b>0.980</b>  | <b>0.932</b>  | <b>0.908</b>  | <b>0.635</b>  | <b>0.807</b>  | <b>0.703</b>  | <b>0.699</b>  | <b>0.929</b>  | <b>0.911</b>  | <b>0.577</b> | <b>0.845</b>  | <b>0.855</b> | <b>0.548</b> | <b>0.628</b> | 0.246        |
| 3-Methyl-1-pentanol              | -0.149        | -0.137        | 0.042         | -0.391        | 0.043         | -0.022        | 0.088         | -0.161        | -0.071        | 0.032        | 0.050         | 0.212        | 0.354        | -0.041       | 0.189        |
| (E)-3-Hexen-1-ol                 | 0.207         | 0.184         | 0.034         | 0.391         | 0.067         | -0.010        | 0.146         | 0.224         | 0.063         | 0.069        | 0.116         | 0.029        | 0.008        | 0.041        | -0.023       |
| 1-Hexanol                        | 0.239         | 0.264         | 0.040         | <b>0.458</b>  | <b>0.495</b>  | -0.116        | 0.225         | 0.337         | 0.412         | -0.093       | 0.359         | 0.205        | 0.200        | 0.240        | 0.065        |
| 2-Methyl-4-heptanol              | 0.144         | 0.217         | 0.062         | 0.319         | 0.438         | -0.097        | <b>0.572</b>  | 0.192         | 0.365         | 0.179        | <b>0.454</b>  | 0.338        | 0.355        | <b>0.550</b> | <b>0.730</b> |
| 2-Ethyl-1-hexanol                | 0.067         | 0.105         | 0.411         | -0.203        | -0.080        | <b>0.612</b>  | 0.018         | -0.117        | -0.081        | 0.158        | 0.004         | 0.207        | 0.105        | -0.089       | 0.082        |
| Linalool                         | <b>0.785</b>  | <b>0.787</b>  | <b>0.950</b>  | 0.371         | <b>0.676</b>  | <b>0.918</b>  | <b>0.509</b>  | <b>0.598</b>  | <b>0.696</b>  | 0.440        | <b>0.684</b>  | <b>0.791</b> | 0.426        | 0.412        | 0.275        |
| 1-Octanol                        | <b>-0.545</b> | <b>-0.595</b> | <b>-0.555</b> | <b>-0.619</b> | <b>-0.461</b> | <b>-0.532</b> | -0.343        | <b>-0.476</b> | <b>-0.540</b> | -0.279       | <b>-0.482</b> | -            | -0.197       | -0.439       | -0.284       |
|                                  |               |               |               |               |               |               |               |               |               |              |               | 0.409        |              |              |              |

|                                        |               |               |               |               |               |               |               |               |               |               |               |              |               |               |               |
|----------------------------------------|---------------|---------------|---------------|---------------|---------------|---------------|---------------|---------------|---------------|---------------|---------------|--------------|---------------|---------------|---------------|
| 2,3-Butanediol                         | 0.080         | 0.146         | 0.278         | -0.299        | 0.086         | 0.200         | 0.288         | 0.042         | 0.086         | 0.379         | 0.220         | 0.333        | 0.266         | 0.282         | 0.283         |
| Phenylethyl alcohol                    | -0.396        | -0.432        | -0.240        | <b>-0.556</b> | -0.299        | -0.162        | -0.249        | -0.404        | -0.384        | -0.224        | -0.296        | -            | -0.060        | -0.345        | -0.124        |
| Total alcohol                          | 0.062         | 0.044         | 0.213         | -0.291        | 0.150         | 0.124         | 0.072         | 0.049         | 0.078         | 0.157         | 0.177         | 0.306        | 0.297         | 0.081         | 0.076         |
| 3-Hydroxybutanal                       | 0.160         | 0.156         | 0.250         | -0.007        | 0.316         | 0.176         | 0.186         | 0.136         | 0.259         | -0.006        | 0.267         | 0.267        | 0.151         | 0.118         | 0.121         |
| Octanal                                | 0.342         | 0.319         | 0.216         | 0.104         | 0.176         | 0.145         | 0.312         | 0.323         | 0.230         | 0.308         | 0.204         | 0.243        | 0.069         | 0.171         | -0.022        |
| Total aldehyde                         | 0.344         | 0.321         | 0.217         | 0.105         | 0.178         | 0.147         | 0.314         | 0.324         | 0.232         | 0.308         | 0.206         | 0.245        | 0.071         | 0.172         | -0.021        |
| Benzaldehyde                           | -0.351        | -0.372        | -0.179        | -0.329        | -0.385        | -0.122        | -0.279        | -0.344        | -0.344        | -0.155        | -0.306        | -            | -0.131        | -0.267        | -0.092        |
| Myristicin                             | <b>-0.513</b> | <b>-0.595</b> | -0.408        | <b>-0.500</b> | <b>-0.626</b> | -0.125        | <b>-0.571</b> | <b>-0.558</b> | <b>-0.616</b> | <b>-0.492</b> | <b>-0.635</b> | 0.311        | <b>-0.540</b> | <b>-0.655</b> | <b>-0.475</b> |
| Benzeneacetaldehyde                    | 0.322         | 0.331         | <b>0.520</b>  | 0.167         | 0.361         | 0.320         | 0.352         | 0.294         | 0.382         | 0.441         | <b>0.521</b>  | <b>0.538</b> | <b>0.532</b>  | <b>0.489</b>  | <b>0.564</b>  |
| Naphthalene                            | <b>0.815</b>  | <b>0.852</b>  | <b>0.954</b>  | <b>0.553</b>  | <b>0.710</b>  | <b>0.865</b>  | <b>0.575</b>  | <b>0.684</b>  | <b>0.764</b>  | <b>0.526</b>  | <b>0.751</b>  | <b>0.799</b> | <b>0.534</b>  | <b>0.556</b>  | 0.390         |
| 1,2-Dihydro-1,1,6-trimethylnaphthalene | <b>0.815</b>  | <b>0.852</b>  | <b>0.954</b>  | <b>0.553</b>  | <b>0.710</b>  | <b>0.865</b>  | <b>0.575</b>  | <b>0.684</b>  | <b>0.764</b>  | <b>0.526</b>  | <b>0.751</b>  | <b>0.799</b> | <b>0.534</b>  | <b>0.556</b>  | 0.390         |
| Benzyl alcohol                         | 0.139         | 0.156         | -0.047        | 0.432         | 0.382         | -0.140        | 0.072         | 0.217         | 0.303         | -0.198        | 0.258         | 0.069        | 0.033         | 0.181         | 0.034         |
| Total benzenoid                        | 0.087         | 0.094         | -0.055        | 0.396         | 0.342         | -0.143        | 0.019         | 0.165         | 0.265         | -0.242        | 0.236         | 0.038        | 0.025         | 0.149         | 0.043         |
| Ethyl butanoate                        | 0.349         | 0.376         | 0.199         | 0.249         | <b>0.636</b>  | -0.023        | 0.389         | 0.422         | <b>0.530</b>  | 0.123         | <b>0.532</b>  | <b>0.459</b> | 0.329         | <b>0.446</b>  | 0.226         |
| Ethyl 3-methylbutanoate                | 0.038         | 0.022         | -0.059        | -0.099        | 0.269         | -0.203        | 0.151         | 0.115         | 0.178         | -0.055        | 0.198         | 0.196        | 0.181         | 0.121         | 0.055         |
| 3-Methylbutyl acetate                  | 0.331         | 0.359         | 0.120         | 0.391         | <b>0.566</b>  | -0.126        | 0.351         | 0.435         | <b>0.503</b>  | 0.143         | <b>0.487</b>  | 0.349        | 0.304         | <b>0.459</b>  | 0.239         |
| 3-Hydroxymandelic acid ethyl ester     | 0.194         | 0.247         | 0.107         | 0.039         | 0.290         | -0.153        | 0.396         | 0.257         | 0.256         | 0.419         | 0.333         | 0.353        | 0.361         | 0.428         | 0.354         |
| Ethyl hexanoate                        | -0.036        | -0.054        | -0.219        | -0.123        | 0.203         | -0.279        | 0.005         | 0.036         | 0.076         | -0.207        | 0.053         | 0.013        | -0.108        | 0.000         | -0.167        |
| Hexyl acetate                          | 0.203         | 0.206         | -0.032        | 0.301         | 0.380         | -0.236        | 0.207         | 0.312         | 0.336         | 0.055         | 0.309         | 0.177        | 0.174         | 0.304         | 0.123         |
| Ethyl (E)-3-hexenoate                  | 0.267         | 0.321         | 0.311         | 0.126         | 0.439         | 0.034         | 0.416         | 0.328         | 0.387         | 0.378         | <b>0.498</b>  | <b>0.508</b> | <b>0.565</b>  | <b>0.474</b>  | 0.434         |
| Ethyl lactate                          | -0.190        | -0.217        | -0.068        | <b>-0.470</b> | -0.228        | -0.044        | -0.131        | -0.196        | -0.248        | 0.011         | -0.181        | -            | -0.024        | -0.197        | -0.176        |
| Propyl hexanoate                       | 0.060         | 0.041         | 0.002         | -0.266        | 0.200         | -0.091        | 0.153         | 0.070         | 0.093         | 0.053         | 0.120         | 0.043        | 0.130         | 0.037         | -0.038        |
| Ethyl octanoate                        | -0.336        | -0.387        | <b>-0.552</b> | -0.334        | -0.268        | <b>-0.572</b> | -0.280        | -0.233        | -0.322        | -0.249        | -0.340        | -            | -0.337        | -0.262        | -0.349        |
| Ethyl 3-hydroxybutanoate               | <b>-0.517</b> | <b>-0.608</b> | <b>-0.610</b> | -0.390        | <b>-0.506</b> | <b>-0.524</b> | <b>-0.464</b> | -0.437        | <b>-0.505</b> | <b>-0.478</b> | <b>-0.561</b> | 0.379        | <b>-0.465</b> | <b>-0.533</b> | <b>-0.452</b> |
| Ethyl nonanoate                        | -0.129        | -0.073        | -0.245        | -0.132        | 0.234         | -0.368        | -0.024        | -0.046        | 0.051         | -0.153        | 0.072         | 0.015        | 0.020         | 0.054         | -0.041        |
| Isoamyl lactate                        | 0.106         | 0.172         | 0.381         | -0.328        | 0.048         | 0.336         | 0.271         | 0.026         | 0.048         | 0.432         | 0.172         | 0.398        | 0.371         | 0.190         | 0.263         |
| Methyl decanoate                       | -0.048        | -0.088        | -0.171        | -0.281        | 0.148         | -0.443        | 0.264         | 0.078         | 0.114         | 0.080         | 0.085         | 0.162        | 0.306         | 0.090         | 0.066         |
| Ethyl 2-furancarboxylate               | -0.406        | <b>-0.473</b> | -0.356        | <b>-0.467</b> | <b>-0.490</b> | -0.244        | -0.336        | -0.397        | <b>-0.499</b> | -0.238        | <b>-0.466</b> | -            | -0.253        | <b>-0.453</b> | -0.330        |
| Ethyl decanoate                        | -0.285        | -0.382        | <b>-0.526</b> | -0.202        | -0.305        | <b>-0.553</b> | -0.327        | -0.185        | -0.317        | -0.240        | -0.317        | 0.378        | -             | -0.248        | -0.287        |
| Diethyl succinate                      | -0.422        | <b>-0.482</b> | -0.271        | <b>-0.481</b> | <b>-0.491</b> | -0.055        | <b>-0.468</b> | <b>-0.470</b> | <b>-0.493</b> | -0.334        | <b>-0.490</b> | 0.400        | -             | <b>-0.503</b> | -0.344        |
|                                        |               |               |               |               |               |               |               |               |               |               |               | 0.399        | -0.350        |               |               |

|                      |              |              |               |              |              |               |              |              |              |              |              |              |              |              |        |
|----------------------|--------------|--------------|---------------|--------------|--------------|---------------|--------------|--------------|--------------|--------------|--------------|--------------|--------------|--------------|--------|
| Ethyl 9-decenoate    | -0.324       | -0.427       | <b>-0.500</b> | -0.276       | -0.319       | <b>-0.488</b> | -0.393       | -0.241       | -0.344       | -0.285       | -0.337       | -            | -0.343       | -0.284       | -0.283 |
| Ethyl benzeneacetate | 0.063        | 0.090        | 0.408         | -0.024       | -0.013       | <b>0.576</b>  | -0.022       | -0.096       | -0.002       | 0.029        | 0.073        | 0.406        | 0.133        | -0.059       | 0.175  |
| 2-Phenethyl acetate  | -0.173       | -0.147       | -0.083        | -0.334       | 0.062        | -0.146        | -0.062       | -0.135       | 0.040        | -0.032       | -0.006       | 0.043        | 0.101        | 0.080        | 0.106  |
| Ethyl dodecanoate    | -0.026       | -0.036       | -0.124        | -0.048       | 0.057        | -0.200        | 0.117        | 0.032        | 0.012        | 0.020        | 0.006        | 0.051        | 0.159        | 0.005        | -0.027 |
| Total ester          | 0.166        | 0.213        | 0.070         | 0.011        | 0.267        | -0.184        | 0.365        | 0.234        | 0.229        | 0.389        | 0.305        | 0.322        | 0.332        | 0.399        | 0.323  |
| 3-Hydroxy-2-butanone | -0.170       | -0.224       | -0.279        | -0.155       | -0.173       | -0.269        | -0.218       | -0.133       | -0.183       | -0.150       | -0.191       | -            | -0.185       | -0.137       | -0.140 |
| Limonene             | <b>0.711</b> | <b>0.774</b> | <b>0.884</b>  | <b>0.497</b> | <b>0.638</b> | <b>0.813</b>  | <b>0.543</b> | <b>0.588</b> | <b>0.684</b> | <b>0.486</b> | <b>0.678</b> | <b>0.733</b> | <b>0.514</b> | <b>0.507</b> | 0.390  |
| Terpinolene          | <b>0.853</b> | <b>0.747</b> | <b>0.681</b>  | <b>0.727</b> | <b>0.707</b> | <b>0.537</b>  | <b>0.666</b> | <b>0.849</b> | <b>0.836</b> | 0.228        | <b>0.699</b> | <b>0.658</b> | 0.330        | 0.403        | 0.086  |
| Total terpene        | <b>0.805</b> | <b>0.835</b> | <b>0.910</b>  | <b>0.594</b> | <b>0.712</b> | <b>0.817</b>  | <b>0.618</b> | <b>0.698</b> | <b>0.777</b> | <b>0.469</b> | <b>0.742</b> | <b>0.782</b> | <b>0.521</b> | <b>0.528</b> | 0.355  |

Values in **bold** indicate significant ( $p < 0.05$ ) correlation

**Table S6** Correlation matrix of quantified phenolic and volatile compounds, physicochemical properties and tested responses of tea-macerated Chardonnay wines

(continued 3/7)

| Variables                              | Unknown quercetin conjugate | Unknown kaempferol conjugate | Total flavonoids | Caffeine      | Ethoxyacetic acid | Acetic acid  | Pterin-6-carboxylic acid | Hexanoic acid | Octanoic acid | Nonanoic acid | Total acid    | 2-Methyl-1-propanol | 2-Pentanol    | 1-Butanol    | 2-Hexanol    |
|----------------------------------------|-----------------------------|------------------------------|------------------|---------------|-------------------|--------------|--------------------------|---------------|---------------|---------------|---------------|---------------------|---------------|--------------|--------------|
| TA                                     | <b>-0.611</b>               | <b>-0.624</b>                | <b>-0.760</b>    | <b>-0.668</b> | -0.226            | -0.054       | <b>-0.567</b>            | -0.005        | <b>0.507</b>  | <b>0.459</b>  | 0.433         | -0.361              | -0.381        | -0.183       | -0.184       |
| pH                                     | <b>0.666</b>                | <b>0.668</b>                 | <b>0.824</b>     | <b>0.729</b>  | 0.220             | 0.059        | <b>0.614</b>             | -0.004        | <b>-0.540</b> | <b>-0.467</b> | <b>-0.459</b> | 0.400               | 0.389         | 0.179        | 0.198        |
| TPC                                    | <b>0.817</b>                | <b>0.840</b>                 | <b>0.964</b>     | <b>0.752</b>  | 0.167             | 0.276        | <b>0.856</b>             | -0.316        | <b>-0.668</b> | <b>-0.539</b> | <b>-0.632</b> | 0.379               | 0.246         | 0.368        | 0.308        |
| TFC                                    | <b>0.921</b>                | <b>0.870</b>                 | <b>0.958</b>     | <b>0.860</b>  | 0.333             | 0.288        | <b>0.724</b>             | -0.395        | <b>-0.606</b> | -0.442        | <b>-0.589</b> | 0.329               | 0.394         | 0.418        | 0.388        |
| DPPH                                   | <b>0.826</b>                | <b>0.852</b>                 | <b>0.979</b>     | <b>0.756</b>  | 0.186             | 0.256        | <b>0.827</b>             | -0.275        | <b>-0.687</b> | <b>-0.549</b> | <b>-0.638</b> | 0.400               | 0.281         | 0.394        | 0.347        |
| FRAP                                   | <b>0.809</b>                | <b>0.658</b>                 | <b>0.835</b>     | <b>0.962</b>  | 0.260             | 0.068        | <b>0.569</b>             | -0.354        | <b>-0.531</b> | -0.389        | <b>-0.518</b> | 0.188               | <b>0.555</b>  | 0.198        | 0.158        |
| ABTS                                   | <b>0.910</b>                | <b>0.831</b>                 | <b>0.941</b>     | <b>0.911</b>  | 0.352             | 0.225        | <b>0.673</b>             | -0.359        | <b>-0.533</b> | -0.350        | <b>-0.513</b> | 0.342               | <b>0.450</b>  | <b>0.474</b> | 0.394        |
| L*                                     | -0.200                      | -0.406                       | <b>-0.445</b>    | 0.015         | 0.257             | -0.300       | <b>-0.597</b>            | -0.009        | <b>0.696</b>  | <b>0.708</b>  | <b>0.611</b>  | -0.304              | 0.304         | -0.079       | -0.178       |
| a*                                     | 0.086                       | 0.284                        | 0.388            | -0.085        | -0.383            | 0.218        | <b>0.643</b>             | 0.038         | <b>-0.591</b> | <b>-0.629</b> | <b>-0.517</b> | 0.262               | <b>-0.472</b> | -0.039       | -0.007       |
| b*                                     | 0.333                       | <b>0.517</b>                 | <b>0.560</b>     | 0.095         | -0.229            | 0.253        | <b>0.644</b>             | -0.065        | <b>-0.756</b> | <b>-0.779</b> | <b>-0.683</b> | 0.281               | -0.200        | 0.095        | 0.156        |
| Quinic acid                            | <b>0.450</b>                | <b>0.570</b>                 | <b>0.703</b>     | 0.314         | -0.207            | 0.309        | <b>0.866</b>             | -0.159        | <b>-0.726</b> | <b>-0.702</b> | <b>-0.669</b> | 0.304               | -0.145        | 0.144        | 0.127        |
| Gallic acid                            | <b>0.872</b>                | <b>0.766</b>                 | <b>0.877</b>     | <b>0.819</b>  | 0.303             | 0.233        | <b>0.618</b>             | -0.400        | <b>-0.458</b> | -0.332        | <b>-0.469</b> | 0.267               | 0.338         | 0.372        | 0.273        |
| Chlorogenic acid                       | <b>0.849</b>                | <b>0.789</b>                 | <b>0.935</b>     | <b>0.902</b>  | 0.302             | 0.198        | <b>0.739</b>             | -0.327        | <b>-0.543</b> | -0.377        | <b>-0.517</b> | 0.340               | 0.406         | 0.337        | 0.290        |
| Total phenolic acids                   | <b>0.704</b>                | <b>0.745</b>                 | <b>0.892</b>     | <b>0.597</b>  | -0.008            | 0.317        | <b>0.895</b>             | -0.284        | <b>-0.721</b> | <b>-0.644</b> | <b>-0.683</b> | 0.340               | 0.058         | 0.264        | 0.214        |
| Gallocatechin                          | <b>0.899</b>                | <b>0.890</b>                 | <b>0.986</b>     | <b>0.807</b>  | 0.272             | 0.279        | <b>0.762</b>             | -0.343        | <b>-0.685</b> | <b>-0.510</b> | <b>-0.643</b> | 0.367               | 0.314         | 0.379        | 0.339        |
| Epigallocatechin                       | <b>0.902</b>                | <b>0.823</b>                 | <b>0.934</b>     | <b>0.919</b>  | 0.360             | 0.228        | <b>0.678</b>             | -0.370        | <b>-0.515</b> | -0.314        | <b>-0.496</b> | 0.333               | <b>0.445</b>  | 0.429        | 0.344        |
| Procyanidin B1                         | <b>0.959</b>                | <b>0.903</b>                 | <b>0.950</b>     | <b>0.836</b>  | 0.377             | 0.312        | <b>0.682</b>             | -0.420        | <b>-0.588</b> | -0.404        | <b>-0.575</b> | 0.330               | 0.378         | <b>0.458</b> | 0.412        |
| Catechin                               | <b>0.850</b>                | <b>0.912</b>                 | <b>0.991</b>     | <b>0.685</b>  | 0.211             | 0.414        | <b>0.881</b>             | -0.286        | <b>-0.706</b> | <b>-0.524</b> | <b>-0.647</b> | <b>0.470</b>        | 0.152         | <b>0.486</b> | 0.418        |
| Procyanidin B2                         | <b>0.646</b>                | 0.393                        | <b>0.579</b>     | <b>0.865</b>  | 0.170             | -0.245       | 0.217                    | -0.407        | -0.392        | -0.364        | -0.435        | -0.094              | <b>0.660</b>  | -0.016       | 0.020        |
| Epicatechin                            | <b>0.775</b>                | <b>0.869</b>                 | <b>0.818</b>     | <b>0.708</b>  | <b>0.551</b>      | 0.165        | <b>0.501</b>             | -0.198        | -0.396        | -0.219        | -0.355        | 0.427               | 0.342         | 0.318        | 0.363        |
| Epigallocatechin gallate               | <b>0.611</b>                | <b>0.698</b>                 | <b>0.824</b>     | <b>0.504</b>  | -0.044            | 0.309        | <b>0.895</b>             | -0.237        | <b>-0.700</b> | <b>-0.646</b> | <b>-0.657</b> | 0.345               | -0.003        | 0.208        | 0.182        |
| Procyanidin B1 3-O-gallate             | <b>0.649</b>                | <b>0.640</b>                 | <b>0.661</b>     | <b>0.680</b>  | 0.385             | 0.272        | <b>0.491</b>             | -0.299        | <b>-0.446</b> | -0.186        | -0.405        | 0.273               | 0.394         | 0.181        | 0.204        |
| Gallocatechin gallate                  | <b>0.862</b>                | <b>0.721</b>                 | <b>0.823</b>     | <b>0.946</b>  | 0.433             | 0.164        | <b>0.491</b>             | -0.343        | -0.390        | -0.182        | -0.378        | 0.283               | <b>0.562</b>  | <b>0.452</b> | 0.362        |
| Quercetin 3-O-di-galactoside/glucoside | <b>0.842</b>                | <b>0.818</b>                 | <b>0.871</b>     | <b>0.884</b>  | <b>0.475</b>      | 0.156        | <b>0.549</b>             | -0.303        | <b>-0.461</b> | -0.252        | -0.431        | 0.343               | <b>0.515</b>  | 0.356        | 0.338        |
| Myricetin 3-O-galactoside 1            | <b>0.784</b>                | <b>0.704</b>                 | <b>0.639</b>     | 0.368         | 0.283             | <b>0.565</b> | <b>0.471</b>             | -0.378        | -0.435        | -0.198        | -0.419        | 0.314               | 0.099         | <b>0.754</b> | <b>0.601</b> |
| Epicatechin gallate                    | <b>0.836</b>                | <b>0.889</b>                 | <b>0.854</b>     | <b>0.715</b>  | <b>0.487</b>      | 0.281        | <b>0.561</b>             | -0.266        | <b>-0.481</b> | -0.279        | -0.441        | 0.440               | 0.319         | 0.442        | 0.413        |
| Rutin                                  | <b>0.777</b>                | <b>0.910</b>                 | <b>0.888</b>     | <b>0.642</b>  | <b>0.467</b>      | 0.411        | <b>0.727</b>             | -0.190        | <b>-0.536</b> | -0.279        | <b>-0.458</b> | <b>0.554</b>        | 0.193         | <b>0.497</b> | <b>0.496</b> |
| Quercetin 3-O-galactoside              | <b>0.582</b>                | <b>0.628</b>                 | <b>0.599</b>     | 0.382         | 0.394             | 0.296        | 0.392                    | -0.047        | -0.381        | -0.119        | -0.289        | <b>0.460</b>        | 0.192         | <b>0.495</b> | <b>0.469</b> |

|                                  |               |               |               |               |              |               |               |               |               |               |               |              |               |              |              |
|----------------------------------|---------------|---------------|---------------|---------------|--------------|---------------|---------------|---------------|---------------|---------------|---------------|--------------|---------------|--------------|--------------|
| Kaempferol 3-O-rutinoside 2      | <b>0.826</b>  | <b>0.781</b>  | <b>0.666</b>  | <b>0.523</b>  | 0.438        | 0.366         | 0.356         | -0.393        | -0.415        | -0.218        | -0.414        | 0.286        | 0.264         | <b>0.594</b> | <b>0.519</b> |
| Kaempferol 3-O-glucoside         | 0.441         | <b>0.495</b>  | 0.396         | 0.135         | 0.211        | 0.251         | 0.255         | -0.209        | -0.376        | -0.216        | -0.345        | 0.206        | 0.028         | 0.261        | 0.287        |
| Unknown quercetin conjugate      | <b>1</b>      | <b>0.882</b>  | <b>0.889</b>  | <b>0.771</b>  | 0.369        | 0.359         | <b>0.582</b>  | <b>-0.530</b> | <b>-0.574</b> | -0.400        | <b>-0.591</b> | 0.244        | 0.400         | <b>0.560</b> | <b>0.484</b> |
| Unknown kaempferol conjugate     | <b>0.882</b>  | <b>1</b>      | <b>0.911</b>  | <b>0.591</b>  | <b>0.446</b> | <b>0.450</b>  | <b>0.725</b>  | -0.346        | <b>-0.555</b> | -0.357        | <b>-0.525</b> | <b>0.465</b> | 0.178         | <b>0.591</b> | <b>0.553</b> |
| Total flavonoids                 | <b>0.889</b>  | <b>0.911</b>  | <b>1</b>      | <b>0.771</b>  | 0.261        | 0.363         | <b>0.836</b>  | -0.319        | <b>-0.680</b> | <b>-0.491</b> | <b>-0.631</b> | 0.436        | 0.247         | <b>0.467</b> | 0.402        |
| Caffeine                         | <b>0.771</b>  | <b>0.591</b>  | <b>0.771</b>  | <b>1</b>      | 0.345        | 0.003         | <b>0.448</b>  | -0.327        | -0.397        | -0.232        | -0.390        | 0.166        | <b>0.642</b>  | 0.204        | 0.171        |
| Ethoxyacetic acid                | 0.369         | <b>0.446</b>  | 0.261         | 0.345         | <b>1</b>     | 0.254         | 0.014         | 0.121         | 0.379         | <b>0.508</b>  | 0.390         | <b>0.492</b> | 0.357         | 0.317        | <b>0.460</b> |
| Acetic acid                      | 0.359         | <b>0.450</b>  | 0.363         | 0.003         | 0.254        | <b>1</b>      | <b>0.557</b>  | 0.015         | -0.242        | -0.151        | -0.187        | <b>0.605</b> | -0.382        | <b>0.582</b> | <b>0.532</b> |
| Pterin-6-carboxylic acid         | <b>0.582</b>  | <b>0.725</b>  | <b>0.836</b>  | <b>0.448</b>  | 0.014        | <b>0.557</b>  | <b>1</b>      | -0.117        | <b>-0.662</b> | <b>-0.508</b> | <b>-0.574</b> | <b>0.562</b> | -0.140        | 0.417        | 0.318        |
| Hexanoic acid                    | <b>-0.530</b> | -0.346        | -0.319        | -0.327        | 0.121        | 0.015         | -0.117        | <b>1</b>      | <b>0.528</b>  | 0.369         | <b>0.666</b>  | <b>0.567</b> | -0.233        | -0.147       | -0.046       |
| Octanoic acid                    | <b>-0.574</b> | <b>-0.555</b> | <b>-0.680</b> | -0.397        | 0.379        | -0.242        | <b>-0.662</b> | <b>0.528</b>  | <b>1</b>      | <b>0.896</b>  | <b>0.980</b>  | 0.017        | -0.020        | -0.196       | -0.098       |
| Nonanoic acid                    | -0.400        | -0.357        | <b>-0.491</b> | -0.232        | <b>0.508</b> | -0.151        | <b>-0.508</b> | 0.369         | <b>0.896</b>  | <b>1</b>      | <b>0.896</b>  | 0.069        | -0.014        | -0.067       | -0.016       |
| Total acid                       | <b>-0.591</b> | <b>-0.525</b> | <b>-0.631</b> | -0.390        | 0.390        | -0.187        | <b>-0.574</b> | <b>0.666</b>  | <b>0.980</b>  | <b>0.896</b>  | <b>1</b>      | 0.163        | -0.072        | -0.178       | -0.078       |
| 2-Methyl-1-propanol              | 0.244         | <b>0.465</b>  | 0.436         | 0.166         | <b>0.492</b> | <b>0.605</b>  | <b>0.562</b>  | <b>0.567</b>  | 0.017         | 0.069         | 0.163         | <b>1</b>     | -0.194        | <b>0.480</b> | <b>0.524</b> |
| 2-Pentanol                       | 0.400         | 0.178         | 0.247         | <b>0.642</b>  | 0.357        | -0.382        | -0.140        | -0.233        | -0.020        | -0.014        | -0.072        | -0.194       | <b>1</b>      | -0.028       | 0.016        |
| 1-Butanol                        | <b>0.560</b>  | <b>0.591</b>  | <b>0.467</b>  | 0.204         | 0.317        | <b>0.582</b>  | 0.417         | -0.147        | -0.196        | -0.067        | -0.178        | <b>0.480</b> | -0.028        | <b>1</b>     | <b>0.913</b> |
| 2-Hexanol                        | <b>0.484</b>  | <b>0.553</b>  | 0.402         | 0.171         | <b>0.460</b> | <b>0.532</b>  | 0.318         | -0.046        | -0.098        | -0.016        | -0.078        | <b>0.524</b> | 0.016         | <b>0.913</b> | <b>1</b>     |
| 3-Methyl-1-butanol               | -0.107        | 0.114         | 0.138         | -0.084        | 0.220        | <b>0.546</b>  | 0.393         | <b>0.754</b>  | 0.100         | 0.061         | 0.260         | <b>0.899</b> | -0.384        | 0.234        | 0.293        |
| 1-(2-Aminoethylamino)-2-propanol | <b>0.774</b>  | <b>0.791</b>  | <b>0.895</b>  | <b>0.878</b>  | 0.307        | 0.183         | <b>0.703</b>  | -0.260        | <b>-0.532</b> | -0.305        | <b>-0.479</b> | 0.355        | 0.419         | 0.335        | 0.264        |
| 2-Octen-4-ol                     | <b>0.857</b>  | <b>0.849</b>  | <b>0.946</b>  | <b>0.878</b>  | 0.380        | 0.296         | <b>0.752</b>  | -0.261        | <b>-0.520</b> | -0.312        | <b>-0.472</b> | <b>0.456</b> | 0.395         | <b>0.472</b> | 0.394        |
| 3-Methyl-1-pentanol              | -0.225        | 0.005         | -0.010        | -0.206        | 0.268        | 0.419         | 0.216         | <b>0.805</b>  | 0.194         | 0.203         | 0.364         | <b>0.809</b> | -0.315        | 0.123        | 0.222        |
| (E)-3-Hexen-1-ol                 | 0.186         | 0.067         | 0.082         | 0.282         | 0.081        | -0.221        | -0.119        | -0.198        | -0.020        | -0.016        | -0.064        | -0.196       | 0.335         | -0.040       | -0.015       |
| 1-Hexanol                        | 0.219         | 0.204         | 0.116         | 0.392         | <b>0.535</b> | <b>-0.459</b> | -0.312        | 0.082         | 0.191         | 0.133         | 0.174         | -0.023       | <b>0.725</b>  | -0.143       | 0.022        |
| 2-Methyl-4-heptanol              | 0.286         | 0.228         | 0.116         | 0.238         | 0.381        | -0.239        | -0.190        | -0.208        | 0.037         | 0.135         | 0.004         | -0.108       | 0.398         | -0.098       | 0.021        |
| 2-Ethyl-1-hexanol                | 0.038         | 0.198         | 0.317         | -0.133        | -0.396       | <b>0.558</b>  | <b>0.732</b>  | 0.220         | <b>-0.500</b> | <b>-0.530</b> | -0.392        | <b>0.491</b> | <b>-0.534</b> | 0.207        | 0.131        |
| Linalool                         | <b>0.672</b>  | <b>0.806</b>  | <b>0.922</b>  | <b>0.573</b>  | 0.112        | 0.388         | <b>0.942</b>  | -0.154        | <b>-0.654</b> | <b>-0.516</b> | <b>-0.580</b> | <b>0.509</b> | 0.020         | 0.343        | 0.287        |
| 1-Octanol                        | <b>-0.613</b> | <b>-0.502</b> | <b>-0.580</b> | <b>-0.526</b> | 0.161        | 0.190         | -0.321        | <b>0.737</b>  | <b>0.705</b>  | <b>0.649</b>  | <b>0.782</b>  | 0.396        | -0.389        | -0.053       | 0.007        |
| 2,3-Butanediol                   | 0.170         | 0.272         | 0.228         | -0.062        | 0.159        | <b>0.879</b>  | <b>0.456</b>  | 0.165         | -0.222        | -0.179        | -0.145        | <b>0.530</b> | -0.335        | 0.282        | 0.205        |
| Phenylethyl alcohol              | <b>-0.497</b> | -0.305        | -0.299        | -0.440        | 0.046        | 0.388         | 0.061         | <b>0.843</b>  | 0.391         | 0.302         | <b>0.525</b>  | <b>0.652</b> | <b>-0.541</b> | 0.022        | 0.075        |
| Total alcohol                    | -0.020        | 0.187         | 0.167         | -0.064        | 0.320        | <b>0.598</b>  | 0.379         | <b>0.710</b>  | 0.138         | 0.120         | 0.287         | <b>0.931</b> | -0.327        | 0.433        | <b>0.493</b> |
| 3-Hydroxybutanal                 | 0.082         | 0.290         | 0.234         | 0.119         | -0.023       | 0.013         | 0.229         | 0.042         | -0.234        | -0.093        | -0.165        | 0.115        | -0.042        | 0.034        | -0.014       |
| Octanal                          | 0.337         | 0.293         | 0.241         | 0.270         | <b>0.597</b> | <b>0.562</b>  | 0.249         | -0.216        | 0.133         | 0.293         | 0.102         | 0.298        | 0.048         | 0.211        | 0.217        |
| Total aldehyde                   | 0.338         | 0.295         | 0.243         | 0.271         | <b>0.598</b> | <b>0.562</b>  | 0.251         | -0.214        | 0.133         | 0.293         | 0.102         | 0.301        | 0.049         | 0.211        | 0.217        |

|                                         |               |               |               |               |               |               |               |              |               |               |               |              |               |              |              |
|-----------------------------------------|---------------|---------------|---------------|---------------|---------------|---------------|---------------|--------------|---------------|---------------|---------------|--------------|---------------|--------------|--------------|
| Benzaldehyde                            | -0.349        | -0.296        | -0.232        | -0.355        | <b>-0.671</b> | -0.004        | -0.013        | 0.129        | -0.240        | -0.280        | -0.189        | -0.157       | -0.358        | -0.115       | -0.255       |
| Myristicin                              | <b>-0.655</b> | <b>-0.591</b> | <b>-0.466</b> | <b>-0.515</b> | <b>-0.537</b> | 0.041         | -0.032        | <b>0.544</b> | 0.232         | 0.044         | 0.292         | 0.148        | <b>-0.573</b> | -0.198       | -0.271       |
| Benzeneacetaldehyde                     | 0.396         | <b>0.467</b>  | <b>0.485</b>  | 0.196         | -0.073        | 0.289         | 0.443         | -0.170       | <b>-0.584</b> | <b>-0.522</b> | <b>-0.539</b> | 0.310        | -0.038        | <b>0.546</b> | <b>0.575</b> |
| Naphthalene                             | <b>0.786</b>  | <b>0.819</b>  | <b>0.944</b>  | <b>0.677</b>  | 0.069         | 0.321         | <b>0.838</b>  | -0.261       | <b>-0.788</b> | <b>-0.683</b> | <b>-0.729</b> | 0.379        | 0.224         | 0.379        | 0.338        |
| 1,2-Dihydro-1,1,6-trimethyl-naphthalene | <b>0.786</b>  | <b>0.819</b>  | <b>0.944</b>  | <b>0.677</b>  | 0.069         | 0.321         | <b>0.838</b>  | -0.261       | <b>-0.788</b> | <b>-0.683</b> | <b>-0.729</b> | 0.379        | 0.224         | 0.379        | 0.338        |
| Benzyl alcohol                          | 0.132         | 0.094         | 0.024         | 0.280         | 0.237         | <b>-0.694</b> | -0.396        | -0.177       | 0.109         | 0.058         | 0.042         | -0.373       | <b>0.555</b>  | -0.260       | -0.155       |
| Total benzenoid                         | 0.072         | 0.054         | 0.004         | 0.226         | 0.093         | <b>-0.727</b> | -0.384        | -0.135       | 0.036         | -0.043        | -0.019        | -0.375       | <b>0.492</b>  | -0.253       | -0.161       |
| Ethyl butanoate                         | 0.330         | 0.435         | 0.256         | 0.385         | <b>0.855</b>  | -0.056        | -0.049        | 0.155        | 0.314         | 0.375         | 0.326         | 0.369        | <b>0.498</b>  | 0.203        | 0.354        |
| Ethyl 3-methylbutanoate                 | -0.043        | 0.088         | -0.032        | 0.095         | <b>0.791</b>  | 0.145         | -0.097        | <b>0.499</b> | <b>0.539</b>  | <b>0.561</b>  | <b>0.597</b>  | <b>0.535</b> | 0.201         | 0.030        | 0.138        |
| 3-Methylbutyl acetate                   | 0.372         | 0.361         | 0.197         | 0.417         | <b>0.758</b>  | -0.256        | -0.235        | -0.114       | 0.272         | 0.338         | 0.226         | 0.011        | <b>0.643</b>  | 0.086        | 0.220        |
| 3-Hydroxymandelic acid ethyl ester      | 0.329         | 0.324         | 0.138         | 0.162         | <b>0.755</b>  | 0.398         | -0.051        | -0.220       | 0.242         | <b>0.445</b>  | 0.205         | 0.157        | 0.120         | 0.297        | 0.418        |
| Ethyl hexanoate                         | -0.116        | 0.014         | -0.179        | 0.006         | <b>0.737</b>  | -0.048        | -0.258        | 0.424        | <b>0.714</b>  | <b>0.690</b>  | <b>0.723</b>  | 0.393        | 0.184         | 0.076        | 0.224        |
| Hexyl acetate                           | 0.233         | 0.204         | 0.043         | 0.303         | <b>0.724</b>  | -0.320        | -0.344        | -0.089       | 0.431         | <b>0.477</b>  | 0.367         | -0.084       | <b>0.609</b>  | 0.023        | 0.147        |
| Ethyl (E)-3-hexenoate                   | 0.333         | 0.376         | 0.322         | 0.262         | <b>0.572</b>  | 0.402         | 0.152         | 0.326        | 0.060         | 0.091         | 0.138         | <b>0.552</b> | 0.137         | 0.330        | <b>0.482</b> |
| Ethyl lactate                           | -0.249        | -0.116        | -0.119        | -0.286        | 0.095         | <b>0.694</b>  | 0.230         | <b>0.546</b> | 0.183         | 0.164         | 0.287         | <b>0.656</b> | <b>-0.547</b> | 0.233        | 0.230        |
| Propyl hexanoate                        | -0.034        | 0.161         | 0.004         | -0.010        | <b>0.744</b>  | 0.364         | 0.088         | <b>0.481</b> | <b>0.544</b>  | <b>0.647</b>  | <b>0.615</b>  | <b>0.687</b> | -0.064        | 0.233        | 0.336        |
| Ethyl octanoate                         | -0.356        | -0.338        | <b>-0.520</b> | -0.283        | <b>0.554</b>  | 0.016         | <b>-0.505</b> | 0.233        | <b>0.877</b>  | <b>0.874</b>  | <b>0.825</b>  | 0.056        | -0.044        | -0.048       | 0.031        |
| Ethyl 3-hydroxybutanoate                | <b>-0.615</b> | <b>-0.653</b> | <b>-0.612</b> | -0.414        | -0.191        | -0.097        | -0.436        | <b>0.455</b> | <b>0.485</b>  | 0.348         | <b>0.504</b>  | 0.055        | -0.273        | -0.237       | -0.211       |
| Ethyl nonanoate                         | -0.091        | 0.059         | -0.213        | -0.091        | <b>0.795</b>  | -0.076        | -0.406        | 0.264        | <b>0.651</b>  | <b>0.644</b>  | <b>0.633</b>  | 0.198        | 0.213         | -0.006       | 0.209        |
| Isoamyl lactate                         | 0.153         | 0.311         | 0.308         | -0.077        | 0.051         | <b>0.878</b>  | <b>0.618</b>  | 0.246        | -0.302        | -0.200        | -0.183        | <b>0.640</b> | <b>-0.458</b> | 0.426        | 0.391        |
| Methyl decanoate                        | -0.121        | 0.016         | -0.146        | -0.007        | <b>0.576</b>  | 0.059         | -0.211        | 0.265        | <b>0.457</b>  | <b>0.716</b>  | <b>0.520</b>  | 0.277        | 0.120         | 0.132        | 0.217        |
| Ethyl 2-furancarboxylate                | <b>-0.512</b> | <b>-0.464</b> | -0.396        | -0.420        | -0.367        | 0.178         | -0.061        | <b>0.497</b> | 0.184         | 0.123         | 0.266         | 0.256        | <b>-0.519</b> | -0.032       | -0.086       |
| Ethyl decanoate                         | -0.331        | -0.376        | <b>-0.485</b> | -0.210        | 0.408         | -0.198        | <b>-0.528</b> | 0.082        | <b>0.816</b>  | <b>0.834</b>  | <b>0.740</b>  | -0.173       | -0.006        | -0.148       | -0.150       |
| Diethyl succinate                       | <b>-0.529</b> | <b>-0.447</b> | -0.334        | <b>-0.477</b> | <b>-0.507</b> | 0.164         | 0.069         | <b>0.493</b> | 0.091         | -0.044        | 0.168         | 0.234        | <b>-0.627</b> | -0.105       | -0.183       |
| Ethyl 9-decenoate                       | -0.393        | -0.414        | <b>-0.476</b> | -0.266        | 0.340         | -0.037        | -0.428        | 0.295        | <b>0.780</b>  | <b>0.747</b>  | <b>0.747</b>  | 0.028        | -0.170        | -0.171       | -0.202       |
| Ethyl benzeneacetate                    | 0.022         | 0.139         | 0.327         | -0.047        | <b>-0.545</b> | 0.211         | <b>0.592</b>  | 0.150        | <b>-0.620</b> | <b>-0.714</b> | <b>-0.528</b> | 0.219        | -0.345        | -0.008       | -0.077       |
| 2-Phenethyl acetate                     | -0.130        | -0.007        | -0.104        | -0.208        | 0.285         | 0.157         | -0.045        | 0.222        | 0.266         | 0.292         | 0.292         | 0.221        | -0.130        | 0.065        | 0.111        |
| Ethyl dodecanoate                       | -0.063        | 0.018         | -0.101        | -0.015        | 0.273         | -0.233        | -0.164        | 0.181        | 0.390         | <b>0.519</b>  | 0.413         | 0.077        | 0.081         | 0.115        | 0.216        |
| Total ester                             | 0.293         | 0.293         | 0.102         | 0.137         | <b>0.771</b>  | 0.393         | -0.077        | -0.182       | 0.295         | <b>0.491</b>  | 0.259         | 0.171        | 0.105         | 0.288        | 0.411        |
| 3-Hydroxy-2-butanone                    | -0.214        | -0.206        | -0.262        | -0.147        | 0.153         | -0.303        | -0.273        | 0.100        | <b>0.575</b>  | <b>0.613</b>  | <b>0.536</b>  | -0.167       | -0.096        | -0.065       | -0.069       |
| Limonene                                | <b>0.720</b>  | <b>0.765</b>  | <b>0.866</b>  | <b>0.589</b>  | 0.022         | 0.325         | <b>0.780</b>  | -0.236       | <b>-0.798</b> | <b>-0.727</b> | <b>-0.740</b> | 0.342        | 0.235         | 0.357        | 0.348        |
| Terpinolene                             | <b>0.631</b>  | <b>0.606</b>  | <b>0.746</b>  | <b>0.898</b>  | 0.259         | -0.041        | <b>0.519</b>  | -0.218       | -0.420        | -0.234        | -0.380        | 0.211        | <b>0.542</b>  | 0.158        | 0.113        |
| Total terpene                           | <b>0.761</b>  | <b>0.792</b>  | <b>0.910</b>  | <b>0.711</b>  | 0.108         | 0.274         | <b>0.783</b>  | -0.237       | <b>-0.757</b> | <b>-0.658</b> | <b>-0.698</b> | 0.362        | 0.328         | 0.342        | 0.333        |

Values in **bold** indicate significant ( $p < 0.05$ ) correlation

**Table S6** Correlation matrix of quantified phenolic and volatile compounds, physicochemical properties and tested responses of tea-macerated Chardonnay wines

(continued 4/7)

| Variables                              | 3-Methyl-1-butanol | 1-(2-Aminoethylamino)-2-propanol | 2-Octen-4-ol  | 3-Methyl-1-pentanol | (E)-3-Hexen-1-ol | 1-Hexanol    | 2-Methyl-4-heptanol | 2-Ethyl-1-hexanol | Linalool      | 1-Octanol     | 2,3-Butanedio l | Phenylethy l alcohol | Total alcohol | 3-Hydroxybutana l | Octanal |
|----------------------------------------|--------------------|----------------------------------|---------------|---------------------|------------------|--------------|---------------------|-------------------|---------------|---------------|-----------------|----------------------|---------------|-------------------|---------|
| TA                                     | -0.145             | <b>-0.680</b>                    | <b>-0.718</b> | -0.133              | -0.176           | -0.418       | -0.201              | -0.201            | <b>-0.687</b> | <b>0.551</b>  | -0.147          | 0.220                | -0.141        | -0.134            | 0.101   |
| pH                                     | 0.180              | <b>0.748</b>                     | <b>0.776</b>  | 0.154               | 0.171            | 0.399        | 0.286               | 0.225             | <b>0.745</b>  | <b>-0.541</b> | 0.113           | -0.214               | 0.167         | 0.178             | -0.089  |
| TPC                                    | 0.105              | <b>0.873</b>                     | <b>0.916</b>  | -0.091              | 0.089            | 0.084        | -0.003              | 0.372             | <b>0.944</b>  | <b>-0.598</b> | 0.133           | -0.305               | 0.114         | 0.192             | 0.232   |
| TFC                                    | 0.011              | <b>0.902</b>                     | <b>0.950</b>  | -0.128              | 0.271            | 0.251        | 0.166               | 0.157             | <b>0.829</b>  | <b>-0.607</b> | 0.130           | -0.419               | 0.051         | 0.142             | 0.321   |
| DPPH                                   | 0.120              | <b>0.866</b>                     | <b>0.910</b>  | -0.031              | 0.051            | 0.144        | 0.063               | 0.341             | <b>0.937</b>  | <b>-0.621</b> | 0.139           | -0.303               | 0.137         | 0.243             | 0.143   |
| FRAP                                   | -0.065             | <b>0.891</b>                     | <b>0.898</b>  | -0.198              | 0.307            | 0.331        | 0.183               | 0.035             | <b>0.670</b>  | <b>-0.592</b> | 0.007           | -0.442               | -0.060        | 0.097             | 0.250   |
| ABTS                                   | 0.023              | <b>0.925</b>                     | <b>0.974</b>  | -0.147              | 0.171            | 0.256        | 0.131               | 0.076             | <b>0.786</b>  | <b>-0.575</b> | 0.075           | -0.400               | 0.077         | 0.175             | 0.284   |
| L*                                     | -0.307             | -0.207                           | -0.201        | -0.293              | 0.264            | 0.189        | -0.039              | <b>-0.691</b>     | <b>-0.577</b> | 0.338         | -0.325          | -0.102               | -0.248        | -0.286            | 0.287   |
| a*                                     | 0.288              | 0.124                            | 0.138         | 0.219               | -0.280           | -0.393       | -0.100              | <b>0.775</b>      | <b>0.615</b>  | -0.286        | 0.234           | 0.172                | 0.197         | 0.169             | -0.226  |
| b*                                     | 0.230              | 0.308                            | 0.315         | 0.185               | -0.226           | -0.086       | 0.037               | <b>0.645</b>      | <b>0.670</b>  | <b>-0.474</b> | 0.279           | -0.027               | 0.172         | 0.275             | -0.288  |
| Quinic acid                            | 0.187              | <b>0.514</b>                     | <b>0.539</b>  | 0.058               | -0.051           | -0.226       | -0.183              | <b>0.731</b>      | <b>0.851</b>  | <b>-0.475</b> | 0.240           | -0.074               | 0.137         | 0.157             | 0.015   |
| Gallic acid                            | -0.019             | <b>0.802</b>                     | <b>0.875</b>  | -0.254              | 0.143            | 0.150        | 0.118               | 0.057             | <b>0.759</b>  | <b>-0.564</b> | 0.079           | -0.391               | 0.008         | 0.056             | 0.371   |
| Chlorogenic acid                       | 0.042              | <b>0.921</b>                     | <b>0.956</b>  | -0.123              | 0.195            | 0.209        | 0.107               | 0.171             | <b>0.841</b>  | <b>-0.560</b> | 0.057           | -0.357               | 0.064         | 0.149             | 0.320   |
| Total phenolic acids                   | 0.128              | <b>0.732</b>                     | <b>0.778</b>  | -0.060              | 0.034            | -0.084       | -0.076              | <b>0.547</b>      | <b>0.944</b>  | <b>-0.585</b> | 0.201           | -0.224               | 0.105         | 0.145             | 0.172   |
| Gallocatechin                          | 0.070              | <b>0.882</b>                     | <b>0.924</b>  | -0.055              | 0.102            | 0.213        | 0.211               | 0.234             | <b>0.877</b>  | <b>-0.642</b> | 0.177           | -0.366               | 0.088         | 0.222             | 0.195   |
| Epigallocatechin                       | 0.019              | <b>0.938</b>                     | <b>0.980</b>  | -0.149              | 0.207            | 0.239        | 0.144               | 0.067             | <b>0.785</b>  | <b>-0.545</b> | 0.080           | -0.396               | 0.062         | 0.160             | 0.342   |
| Procyanidin B1                         | -0.006             | <b>0.876</b>                     | <b>0.932</b>  | -0.137              | 0.184            | 0.264        | 0.217               | 0.105             | <b>0.787</b>  | <b>-0.595</b> | 0.146           | -0.432               | 0.044         | 0.156             | 0.319   |
| Catechin                               | 0.187              | <b>0.852</b>                     | <b>0.908</b>  | 0.042               | 0.034            | 0.040        | 0.062               | 0.411             | <b>0.950</b>  | <b>-0.555</b> | 0.278           | -0.240               | 0.213         | 0.250             | 0.216   |
| Procyanidin B2                         | -0.293             | <b>0.650</b>                     | <b>0.635</b>  | -0.391              | 0.391            | <b>0.458</b> | 0.319               | -0.203            | 0.371         | <b>-0.619</b> | -0.299          | <b>-0.556</b>        | -0.291        | -0.007            | 0.104   |
| Epicatechin                            | 0.124              | <b>0.791</b>                     | <b>0.807</b>  | 0.043               | 0.067            | <b>0.495</b> | 0.438               | -0.080            | <b>0.676</b>  | <b>-0.461</b> | 0.086           | -0.299               | 0.150         | 0.316             | 0.176   |
| Epigallocatechin gallate               | 0.158              | <b>0.674</b>                     | <b>0.703</b>  | -0.022              | -0.010           | -0.116       | -0.097              | <b>0.612</b>      | <b>0.918</b>  | <b>-0.532</b> | 0.200           | -0.162               | 0.124         | 0.176             | 0.145   |
| Procyanidin B1 3-O-gallate             | 0.073              | <b>0.718</b>                     | <b>0.699</b>  | 0.088               | 0.146            | 0.225        | <b>0.572</b>        | 0.018             | <b>0.509</b>  | -0.343        | 0.288           | -0.249               | 0.072         | 0.186             | 0.312   |
| Gallocatechin gallate                  | -0.017             | <b>0.891</b>                     | <b>0.929</b>  | -0.161              | 0.224            | 0.337        | 0.192               | -0.117            | <b>0.598</b>  | <b>-0.476</b> | 0.042           | -0.404               | 0.049         | 0.136             | 0.323   |
| Quercetin 3-O-di-galactoside/glucoside | 0.044              | <b>0.893</b>                     | <b>0.911</b>  | -0.071              | 0.063            | 0.412        | 0.365               | -0.081            | <b>0.696</b>  | <b>-0.540</b> | 0.086           | -0.384               | 0.078         | 0.259             | 0.230   |
| Myricetin 3-O-galactoside 1            | 0.026              | <b>0.449</b>                     | <b>0.577</b>  | 0.032               | 0.069            | -0.093       | 0.179               | 0.158             | 0.440         | -0.279        | 0.379           | -0.224               | 0.157         | -0.006            | 0.308   |
| Epicatechin gallate                    | 0.136              | <b>0.804</b>                     | <b>0.845</b>  | 0.050               | 0.116            | 0.359        | <b>0.454</b>        | 0.004             | <b>0.684</b>  | <b>-0.482</b> | 0.220           | -0.296               | 0.177         | 0.267             | 0.204   |
| Rutin                                  | 0.262              | <b>0.809</b>                     | <b>0.855</b>  | 0.212               | 0.029            | 0.205        | 0.338               | 0.207             | <b>0.791</b>  | -0.409        | 0.333           | -0.159               | 0.306         | 0.267             | 0.243   |
| Quercetin 3-O-galactoside              | 0.221              | <b>0.481</b>                     | <b>0.548</b>  | 0.354               | 0.008            | 0.200        | 0.355               | 0.105             | 0.426         | -0.197        | 0.266           | -0.060               | 0.297         | 0.151             | 0.069   |



|                                  |              |               |               |              |          |               |               |               |               |               |              |               |              |          |              |
|----------------------------------|--------------|---------------|---------------|--------------|----------|---------------|---------------|---------------|---------------|---------------|--------------|---------------|--------------|----------|--------------|
| Kaempferol 3-O-rutinoside 2      | -0.019       | <b>0.540</b>  | <b>0.628</b>  | -0.041       | 0.041    | 0.240         | <b>0.550</b>  | -0.089        | 0.412         | -0.439        | 0.282        | -0.345        | 0.081        | 0.118    | 0.171        |
| Kaempferol 3-O-glucoside         | 0.038        | 0.199         | 0.246         | 0.189        | -0.023   | 0.065         | <b>0.730</b>  | 0.082         | 0.275         | -0.284        | 0.283        | -0.124        | 0.076        | 0.121    | -0.022       |
| Unknown quercetin conjugate      | -0.107       | <b>0.774</b>  | <b>0.857</b>  | -0.225       | 0.186    | 0.219         | 0.286         | 0.038         | <b>0.672</b>  | <b>-0.613</b> | 0.170        | <b>-0.497</b> | -0.020       | 0.082    | 0.337        |
| Unknown kaempferol conjugate     | 0.114        | <b>0.791</b>  | <b>0.849</b>  | 0.005        | 0.067    | 0.204         | 0.228         | 0.198         | <b>0.806</b>  | <b>-0.502</b> | 0.272        | -0.305        | 0.187        | 0.290    | 0.293        |
| Total flavonoids                 | 0.138        | <b>0.895</b>  | <b>0.946</b>  | -0.010       | 0.082    | 0.116         | 0.116         | 0.317         | <b>0.922</b>  | <b>-0.580</b> | 0.228        | -0.299        | 0.167        | 0.234    | 0.241        |
| Caffeine                         | -0.084       | <b>0.878</b>  | <b>0.878</b>  | -0.206       | 0.282    | 0.392         | 0.238         | -0.133        | <b>0.573</b>  | <b>-0.526</b> | -0.062       | -0.440        | -0.064       | 0.119    | 0.270        |
| Ethoxyacetic acid                | 0.220        | 0.307         | 0.380         | 0.268        | 0.081    | <b>0.535</b>  | 0.381         | -0.396        | 0.112         | 0.161         | 0.159        | 0.046         | 0.320        | -0.023   | <b>0.597</b> |
| Acetic acid                      | <b>0.546</b> | 0.183         | 0.296         | 0.419        | -0.221   | <b>-0.459</b> | -0.239        | <b>0.558</b>  | 0.388         | 0.190         | <b>0.879</b> | 0.388         | <b>0.598</b> | 0.013    | <b>0.562</b> |
| Pterin-6-carboxylic acid         | 0.393        | <b>0.703</b>  | <b>0.752</b>  | 0.216        | -0.119   | -0.312        | -0.190        | <b>0.732</b>  | <b>0.942</b>  | -0.321        | <b>0.456</b> | 0.061         | 0.379        | 0.229    | 0.249        |
| Hexanoic acid                    | <b>0.754</b> | -0.260        | -0.261        | <b>0.805</b> | -0.198   | 0.082         | -0.208        | 0.220         | -0.154        | <b>0.737</b>  | 0.165        | <b>0.843</b>  | <b>0.710</b> | 0.042    | -0.216       |
| Octanoic acid                    | 0.100        | <b>-0.532</b> | <b>-0.520</b> | 0.194        | -0.020   | 0.191         | 0.037         | <b>-0.500</b> | <b>-0.654</b> | <b>0.705</b>  | -0.222       | 0.391         | 0.138        | -0.234   | 0.133        |
| Nonanoic acid                    | 0.061        | -0.305        | -0.312        | 0.203        | -0.016   | 0.133         | 0.135         | <b>-0.530</b> | <b>-0.516</b> | <b>0.649</b>  | -0.179       | 0.302         | 0.120        | -0.093   | 0.293        |
| Total acid                       | 0.260        | <b>-0.479</b> | <b>-0.472</b> | 0.364        | -0.064   | 0.174         | 0.004         | -0.392        | <b>-0.580</b> | <b>0.782</b>  | -0.145       | <b>0.525</b>  | 0.287        | -0.165   | 0.102        |
| 2-Methyl-1-propanol              | <b>0.899</b> | 0.355         | <b>0.456</b>  | <b>0.809</b> | -0.196   | -0.023        | -0.108        | <b>0.491</b>  | <b>0.509</b>  | 0.396         | <b>0.530</b> | <b>0.652</b>  | <b>0.931</b> | 0.115    | 0.298        |
| 2-Pentanol                       | -0.384       | 0.419         | 0.395         | -0.315       | 0.335    | <b>0.725</b>  | 0.398         | <b>-0.534</b> | 0.020         | -0.389        | -0.335       | <b>-0.541</b> | -0.327       | -0.042   | 0.048        |
| 1-Butanol                        | 0.234        | 0.335         | <b>0.472</b>  | 0.123        | -0.040   | -0.143        | -0.098        | 0.207         | 0.343         | -0.053        | 0.282        | 0.022         | 0.433        | 0.034    | 0.211        |
| 2-Hexanol                        | 0.293        | 0.264         | 0.394         | 0.222        | -0.015   | 0.022         | 0.021         | 0.131         | 0.287         | 0.007         | 0.205        | 0.075         | <b>0.493</b> | -0.014   | 0.217        |
| 3-Methyl-1-butanol               | <b>1</b>     | 0.085         | 0.153         | <b>0.897</b> | -0.296   | -0.191        | -0.291        | <b>0.573</b>  | 0.295         | <b>0.598</b>  | <b>0.572</b> | <b>0.870</b>  | <b>0.969</b> | 0.058    | 0.139        |
| 1-(2-Aminoethylamino)-2-propanol | 0.085        | <b>1</b>      | <b>0.960</b>  | -0.043       | 0.215    | 0.264         | 0.114         | 0.133         | <b>0.783</b>  | <b>-0.480</b> | 0.086        | -0.312        | 0.106        | 0.418    | 0.235        |
| 2-Octen-4-ol                     | 0.153        | <b>0.960</b>  | <b>1</b>      | -0.006       | 0.183    | 0.223         | 0.099         | 0.167         | <b>0.831</b>  | <b>-0.472</b> | 0.170        | -0.284        | 0.194        | 0.206    | 0.325        |
| 3-Methyl-1-pentanol              | <b>0.897</b> | -0.043        | -0.006        | <b>1</b>     | -0.173   | -0.072        | -0.075        | <b>0.455</b>  | 0.110         | <b>0.672</b>  | <b>0.501</b> | <b>0.853</b>  | <b>0.877</b> | 0.100    | 0.065        |
| (E)-3-Hexen-1-ol                 | -0.296       | 0.215         | 0.183         | -0.173       | <b>1</b> | 0.381         | 0.233         | -0.282        | -0.062        | -0.138        | -0.277       | -0.356        | -0.262       | -0.100   | 0.092        |
| 1-Hexanol                        | -0.191       | 0.264         | 0.223         | -0.072       | 0.381    | <b>1</b>      | <b>0.491</b>  | <b>-0.639</b> | -0.074        | -0.215        | -0.378       | -0.364        | -0.162       | 0.082    | -0.138       |
| 2-Methyl-4-heptanol              | -0.291       | 0.114         | 0.099         | -0.075       | 0.233    | <b>0.491</b>  | <b>1</b>      | <b>-0.447</b> | -0.088        | -0.248        | -0.176       | -0.354        | -0.263       | 0.014    | -0.033       |
| 2-Ethyl-1-hexanol                | <b>0.573</b> | 0.133         | 0.167         | <b>0.455</b> | -0.282   | <b>-0.639</b> | <b>-0.447</b> | <b>1</b>      | <b>0.545</b>  | 0.076         | <b>0.542</b> | <b>0.484</b>  | <b>0.518</b> | 0.147    | -0.027       |
| Linalool                         | 0.295        | <b>0.783</b>  | <b>0.831</b>  | 0.110        | -0.062   | -0.074        | -0.088        | <b>0.545</b>  | <b>1</b>      | <b>-0.466</b> | 0.286        | -0.097        | 0.274        | 0.229    | 0.203        |
| 1-Octanol                        | <b>0.598</b> | <b>-0.480</b> | <b>-0.472</b> | <b>0.672</b> | -0.138   | -0.215        | -0.248        | 0.076         | <b>-0.466</b> | <b>1</b>      | 0.190        | <b>0.845</b>  | <b>0.601</b> | -0.090   | 0.172        |
| 2,3-Butanediol                   | <b>0.572</b> | 0.086         | 0.170         | <b>0.501</b> | -0.277   | -0.378        | -0.176        | <b>0.542</b>  | 0.286         | 0.190         | <b>1</b>     | <b>0.447</b>  | <b>0.547</b> | 0.006    | 0.405        |
| Phenylethyl alcohol              | <b>0.870</b> | -0.312        | -0.284        | <b>0.853</b> | -0.356   | -0.364        | -0.354        | <b>0.484</b>  | -0.097        | <b>0.845</b>  | <b>0.447</b> | <b>1</b>      | <b>0.836</b> | 0.014    | 0.063        |
| Total alcohol                    | <b>0.969</b> | 0.106         | 0.194         | <b>0.877</b> | -0.262   | -0.162        | -0.263        | <b>0.518</b>  | 0.274         | <b>0.601</b>  | <b>0.547</b> | <b>0.836</b>  | <b>1</b>     | 0.057    | 0.173        |
| 3-Hydroxybutanal                 | 0.058        | 0.418         | 0.206         | 0.100        | -0.100   | 0.082         | 0.014         | 0.147         | 0.229         | -0.090        | 0.006        | 0.014         | 0.057        | <b>1</b> | -0.217       |
| Octanal                          | 0.139        | 0.235         | 0.325         | 0.065        | 0.092    | -0.138        | -0.033        | -0.027        | 0.203         | 0.172         | 0.405        | 0.063         | 0.173        | -0.217   | <b>1</b>     |
| Total aldehyde                   | 0.141        | 0.237         | 0.327         | 0.067        | 0.092    | -0.136        | -0.032        | -0.027        | 0.204         | 0.172         | 0.406        | 0.064         | 0.175        | -0.216   | <b>1.000</b> |

|                                        |               |               |               |              |               |               |               |               |               |               |               |               |               |              |               |
|----------------------------------------|---------------|---------------|---------------|--------------|---------------|---------------|---------------|---------------|---------------|---------------|---------------|---------------|---------------|--------------|---------------|
| Benzaldehyde                           | 0.061         | -0.163        | -0.317        | 0.079        | -0.260        | -0.419        | -0.329        | 0.403         | -0.150        | 0.099         | 0.091         | 0.214         | 0.008         | <b>0.589</b> | <b>-0.517</b> |
| Myristicin                             | <b>0.462</b>  | <b>-0.454</b> | <b>-0.465</b> | 0.349        | -0.346        | <b>-0.599</b> | <b>-0.625</b> | <b>0.502</b>  | -0.201        | <b>0.597</b>  | 0.090         | <b>0.707</b>  | 0.382         | -0.039       | -0.209        |
| Benzeneacetaldehyde                    | 0.216         | 0.327         | 0.378         | 0.160        | 0.022         | -0.107        | 0.142         | 0.369         | 0.436         | -0.326        | 0.172         | -0.058        | 0.281         | 0.167        | -0.184        |
| Naphthalene                            | 0.143         | <b>0.815</b>  | <b>0.842</b>  | 0.018        | 0.061         | 0.095         | 0.066         | <b>0.457</b>  | <b>0.907</b>  | <b>-0.642</b> | 0.249         | -0.278        | 0.149         | 0.295        | 0.039         |
| 1,2-Dihydro-1,1,6-trimethylnaphthalene | 0.143         | <b>0.815</b>  | <b>0.842</b>  | 0.018        | 0.061         | 0.095         | 0.066         | <b>0.457</b>  | <b>0.907</b>  | <b>-0.642</b> | 0.249         | -0.278        | 0.149         | 0.295        | 0.039         |
| Benzyl alcohol                         | <b>-0.505</b> | 0.123         | 0.081         | -0.440       | 0.282         | <b>0.834</b>  | <b>0.489</b>  | <b>-0.722</b> | -0.134        | <b>-0.468</b> | <b>-0.603</b> | <b>-0.619</b> | <b>-0.506</b> | -0.012       | -0.356        |
| Total benzenoid                        | <b>-0.465</b> | 0.102         | 0.040         | -0.413       | 0.238         | <b>0.780</b>  | 0.439         | <b>-0.633</b> | -0.134        | <b>-0.477</b> | <b>-0.624</b> | <b>-0.579</b> | <b>-0.475</b> | 0.082        | <b>-0.518</b> |
| Ethyl butanoate                        | 0.093         | 0.353         | 0.381         | 0.176        | 0.185         | <b>0.787</b>  | <b>0.526</b>  | <b>-0.478</b> | 0.102         | -0.026        | -0.073        | -0.131        | 0.173         | 0.102        | 0.201         |
| Ethyl 3-methylbutanoate                | 0.419         | 0.058         | 0.108         | <b>0.538</b> | 0.033         | <b>0.466</b>  | 0.231         | -0.251        | -0.061        | 0.416         | 0.252         | 0.349         | 0.441         | -0.009       | 0.389         |
| 3-Methylbutyl acetate                  | -0.274        | 0.291         | 0.303         | -0.161       | 0.292         | <b>0.854</b>  | <b>0.641</b>  | <b>-0.711</b> | -0.030        | -0.260        | -0.257        | <b>-0.449</b> | -0.191        | 0.016        | 0.138         |
| 3-Hydroxymandelic acid ethyl ester     | -0.048        | 0.102         | 0.181         | 0.045        | 0.172         | 0.174         | 0.422         | -0.373        | -0.027        | 0.046         | 0.284         | -0.120        | 0.050         | -0.183       | <b>0.673</b>  |
| Ethyl hexanoate                        | 0.275         | -0.033        | 0.003         | 0.311        | 0.040         | <b>0.485</b>  | 0.201         | -0.417        | -0.203        | <b>0.491</b>  | -0.115        | 0.265         | 0.336         | -0.057       | 0.308         |
| Hexyl acetate                          | -0.345        | 0.150         | 0.166         | -0.212       | 0.311         | <b>0.785</b>  | <b>0.592</b>  | <b>-0.762</b> | -0.157        | -0.175        | -0.318        | -0.426        | -0.258        | -0.075       | 0.167         |
| Ethyl (E)-3-hexenoate                  | <b>0.446</b>  | 0.242         | 0.327         | <b>0.489</b> | 0.095         | 0.353         | 0.357         | -0.008        | 0.200         | 0.067         | 0.441         | 0.200         | <b>0.498</b>  | -0.056       | 0.133         |
| Ethyl lactate                          | <b>0.828</b>  | -0.151        | -0.093        | <b>0.709</b> | -0.353        | <b>-0.519</b> | <b>-0.527</b> | <b>0.546</b>  | 0.030         | <b>0.726</b>  | <b>0.660</b>  | <b>0.873</b>  | <b>0.817</b>  | -0.010       | 0.373         |
| Propyl hexanoate                       | <b>0.574</b>  | 0.087         | 0.142         | <b>0.617</b> | -0.034        | 0.131         | 0.036         | -0.029        | 0.043         | <b>0.658</b>  | 0.251         | <b>0.537</b>  | <b>0.627</b>  | 0.008        | <b>0.583</b>  |
| Ethyl octanoate                        | 0.050         | -0.394        | -0.352        | 0.089        | -0.013        | 0.084         | 0.003         | <b>-0.489</b> | <b>-0.526</b> | <b>0.628</b>  | -0.064        | 0.274         | 0.106         | -0.266       | <b>0.530</b>  |
| Ethyl 3-hydroxybutanoate               | 0.332         | <b>-0.500</b> | <b>-0.520</b> | 0.292        | -0.205        | -0.248        | -0.368        | -0.023        | <b>-0.513</b> | <b>0.739</b>  | -0.118        | <b>0.572</b>  | 0.285         | -0.100       | -0.009        |
| Ethyl nonanoate                        | 0.060         | -0.119        | -0.112        | 0.180        | 0.027         | <b>0.620</b>  | 0.323         | <b>-0.573</b> | -0.288        | 0.312         | -0.117        | 0.061         | 0.124         | 0.030        | 0.269         |
| Isoamyl lactate                        | <b>0.669</b>  | 0.163         | 0.228         | <b>0.630</b> | -0.236        | <b>-0.509</b> | -0.268        | <b>0.749</b>  | 0.407         | 0.250         | <b>0.874</b>  | <b>0.543</b>  | <b>0.676</b>  | 0.100        | 0.285         |
| Methyl decanoate                       | 0.210         | 0.081         | 0.014         | 0.402        | -0.046        | 0.236         | 0.211         | -0.361        | -0.235        | <b>0.520</b>  | -0.001        | 0.249         | 0.279         | 0.277        | 0.270         |
| Ethyl 2-furancarboxylate               | <b>0.544</b>  | -0.330        | -0.346        | <b>0.495</b> | -0.115        | <b>-0.515</b> | <b>-0.527</b> | 0.401         | -0.246        | <b>0.738</b>  | 0.153         | <b>0.733</b>  | <b>0.504</b>  | -0.031       | -0.057        |
| Ethyl decanoate                        | -0.205        | -0.371        | -0.336        | -0.138       | 0.151         | 0.073         | 0.093         | <b>-0.577</b> | <b>-0.508</b> | 0.386         | -0.214        | 0.054         | -0.162        | -0.301       | 0.410         |
| Diethyl succinate                      | <b>0.542</b>  | -0.379        | -0.376        | 0.384        | <b>-0.522</b> | <b>-0.654</b> | <b>-0.631</b> | <b>0.565</b>  | -0.088        | <b>0.552</b>  | 0.191         | <b>0.731</b>  | <b>0.463</b>  | -0.014       | -0.183        |
| Ethyl 9-decenoate                      | 0.081         | -0.401        | -0.365        | 0.081        | -0.097        | -0.088        | -0.077        | -0.345        | -0.439        | <b>0.543</b>  | -0.003        | 0.365         | 0.092         | -0.209       | 0.408         |
| Ethyl benzeneacetate                   | 0.321         | 0.128         | 0.137         | 0.242        | -0.209        | -0.383        | -0.292        | <b>0.808</b>  | <b>0.525</b>  | -0.288        | 0.358         | 0.196         | 0.228         | 0.158        | -0.393        |
| 2-Phenethyl acetate                    | 0.221         | -0.203        | -0.154        | 0.176        | <b>-0.896</b> | -0.083        | 0.026         | -0.028        | -0.039        | 0.154         | 0.217         | 0.263         | 0.227         | 0.050        | 0.038         |
| Ethyl dodecanoate                      | -0.015        | 0.046         | 0.003         | 0.080        | 0.047         | 0.227         | 0.303         | -0.266        | -0.165        | 0.243         | -0.372        | 0.020         | 0.058         | 0.059        | -0.116        |
| Total ester                            | -0.025        | 0.074         | 0.154         | 0.065        | 0.154         | 0.171         | 0.406         | -0.385        | -0.056        | 0.096         | 0.279         | -0.081        | 0.073         | -0.192       | <b>0.686</b>  |
| 3-Hydroxy-2-butanone                   | -0.229        | -0.222        | -0.200        | -0.196       | -0.054        | 0.024         | 0.209         | -0.354        | -0.246        | 0.098         | -0.323        | -0.071        | -0.196        | -0.180       | -0.059        |
| Limonene                               | 0.134         | <b>0.745</b>  | <b>0.750</b>  | 0.046        | 0.052         | 0.114         | 0.069         | <b>0.482</b>  | <b>0.829</b>  | <b>-0.621</b> | 0.268         | -0.265        | 0.143         | 0.357        | -0.036        |
| Terpinolene                            | -0.009        | <b>0.953</b>  | <b>0.862</b>  | -0.113       | 0.303         | 0.380         | 0.158         | -0.021        | <b>0.619</b>  | <b>-0.458</b> | -0.087        | -0.348        | -0.004        | <b>0.459</b> | 0.135         |

|               |       |              |              |       |       |       |       |       |              |               |       |        |       |       |       |
|---------------|-------|--------------|--------------|-------|-------|-------|-------|-------|--------------|---------------|-------|--------|-------|-------|-------|
| Total terpene | 0.131 | <b>0.842</b> | <b>0.841</b> | 0.031 | 0.117 | 0.196 | 0.104 | 0.399 | <b>0.852</b> | <b>-0.622</b> | 0.215 | -0.294 | 0.139 | 0.350 | 0.025 |
|---------------|-------|--------------|--------------|-------|-------|-------|-------|-------|--------------|---------------|-------|--------|-------|-------|-------|

---

Values in **bold** indicate significant ( $p < 0.05$ ) correlation

**Table S6** Correlation matrix of quantified phenolic and volatile compounds, physicochemical properties and tested responses of tea-macerated Chardonnay wines

(continued 5/7)

| Variables                             | Total aldehyde | Benzaldehyde | Myristicin    | Benzeneacetaldehyde | Naphthalene   | 1,2-Dihydro-1,1,6-trimethylnaphthalene | Benzyl alcohol | Total benzeneid | Ethylbutanoate | Ethyl 3-methylbutanoate | 3-Methylbutyl acetate | 3-Hydroxymandellic acid ethyl ester | Ethyl hexanoate | Hexyl acetate | Ethyl (E)-3-hexenoate |
|---------------------------------------|----------------|--------------|---------------|---------------------|---------------|----------------------------------------|----------------|-----------------|----------------|-------------------------|-----------------------|-------------------------------------|-----------------|---------------|-----------------------|
| TA                                    | 0.099          | 0.253        | 0.426         | -0.330              | <b>-0.815</b> | <b>-0.815</b>                          | -0.298         | -0.289          | -0.387         | -0.195                  | -0.342                | 0.016                               | 0.116           | -0.209        | <b>-0.464</b>         |
| pH                                    | -0.087         | -0.216       | -0.438        | 0.416               | <b>0.869</b>  | <b>0.869</b>                           | 0.273          | 0.276           | 0.380          | 0.139                   | 0.333                 | -0.006                              | -0.130          | 0.186         | <b>0.502</b>          |
| TPC                                   | 0.233          | -0.240       | -0.354        | 0.396               | <b>0.928</b>  | <b>0.928</b>                           | 0.021          | 0.002           | 0.176          | -0.105                  | 0.117                 | 0.004                               | -0.188          | -0.013        | 0.170                 |
| TFC                                   | 0.323          | -0.371       | <b>-0.557</b> | 0.368               | <b>0.887</b>  | <b>0.887</b>                           | 0.134          | 0.079           | 0.342          | 0.010                   | 0.320                 | 0.215                               | -0.087          | 0.180         | 0.318                 |
| DPPH                                  | 0.145          | -0.199       | -0.400        | <b>0.482</b>        | <b>0.964</b>  | <b>0.964</b>                           | 0.065          | 0.063           | 0.226          | -0.058                  | 0.169                 | 0.008                               | -0.204          | 0.020         | 0.253                 |
| FRAP                                  | 0.251          | -0.338       | <b>-0.502</b> | 0.214               | <b>0.772</b>  | <b>0.772</b>                           | 0.231          | 0.178           | 0.299          | 0.001                   | 0.326                 | 0.104                               | -0.107          | 0.204         | 0.245                 |
| ABTS                                  | 0.285          | -0.324       | <b>-0.513</b> | 0.374               | <b>0.842</b>  | <b>0.842</b>                           | 0.160          | 0.121           | 0.361          | 0.038                   | 0.342                 | 0.167                               | -0.049          | 0.206         | 0.289                 |
| L*                                    | 0.285          | -0.276       | -0.002        | <b>-0.606</b>       | <b>-0.636</b> | <b>-0.636</b>                          | 0.187          | 0.086           | 0.166          | 0.252                   | 0.281                 | 0.219                               | 0.442           | 0.424         | -0.202                |
| a*                                    | -0.224         | 0.229        | 0.225         | 0.423               | <b>0.547</b>  | <b>0.547</b>                           | -0.290         | -0.203          | -0.340         | -0.316                  | <b>-0.453</b>         | -0.340                              | <b>-0.469</b>   | <b>-0.529</b> | -0.023                |
| b*                                    | -0.287         | 0.198        | -0.088        | <b>0.561</b>        | <b>0.734</b>  | <b>0.734</b>                           | -0.071         | 0.016           | -0.110         | -0.262                  | -0.196                | -0.257                              | <b>-0.449</b>   | -0.351        | 0.174                 |
| Quinic acid                           | 0.017          | 0.004        | -0.001        | 0.324               | <b>0.803</b>  | <b>0.803</b>                           | -0.229         | -0.208          | -0.168         | -0.272                  | -0.282                | -0.255                              | -0.388          | -0.379        | -0.009                |
| Gallic acid                           | 0.372          | -0.362       | <b>-0.455</b> | 0.297               | <b>0.753</b>  | <b>0.753</b>                           | 0.127          | 0.076           | 0.236          | -0.048                  | 0.275                 | 0.199                               | -0.109          | 0.175         | 0.231                 |
| Chlorogenic acid                      | 0.322          | -0.366       | -0.432        | 0.277               | <b>0.852</b>  | <b>0.852</b>                           | 0.108          | 0.054           | 0.309          | 0.029                   | 0.264                 | 0.110                               | -0.049          | 0.141         | 0.211                 |
| Total phenolic acids                  | 0.174          | -0.161       | -0.203        | 0.358               | <b>0.909</b>  | <b>0.909</b>                           | -0.105         | -0.113          | -0.003         | -0.204                  | -0.074                | -0.097                              | -0.313          | -0.189        | 0.096                 |
| Gallocatechin                         | 0.197          | -0.262       | <b>-0.539</b> | <b>0.454</b>        | <b>0.939</b>  | <b>0.939</b>                           | 0.134          | 0.109           | 0.292          | -0.028                  | 0.272                 | 0.149                               | -0.192          | 0.109         | 0.350                 |
| Epigallocatechin                      | 0.344          | -0.351       | <b>-0.513</b> | 0.322               | <b>0.815</b>  | <b>0.815</b>                           | 0.139          | 0.087           | 0.349          | 0.038                   | 0.331                 | 0.194                               | -0.036          | 0.203         | 0.267                 |
| Procyanidin B1                        | 0.321          | -0.372       | <b>-0.595</b> | 0.331               | <b>0.852</b>  | <b>0.852</b>                           | 0.156          | 0.094           | 0.376          | 0.022                   | 0.359                 | 0.247                               | -0.054          | 0.206         | 0.321                 |
| Catechin                              | 0.217          | -0.179       | -0.408        | <b>0.520</b>        | <b>0.954</b>  | <b>0.954</b>                           | -0.047         | -0.055          | 0.199          | -0.059                  | 0.120                 | 0.107                               | -0.219          | -0.032        | 0.311                 |
| Procyanidin B2                        | 0.105          | -0.329       | <b>-0.500</b> | 0.167               | <b>0.553</b>  | <b>0.553</b>                           | 0.432          | 0.396           | 0.249          | -0.099                  | 0.391                 | 0.039                               | -0.123          | 0.301         | 0.126                 |
| Epicatechin                           | 0.178          | -0.385       | <b>-0.626</b> | 0.361               | <b>0.710</b>  | <b>0.710</b>                           | 0.382          | 0.342           | <b>0.636</b>   | 0.269                   | <b>0.566</b>          | 0.290                               | 0.203           | 0.380         | 0.439                 |
| Epigallocatechin gallate              | 0.147          | -0.122       | -0.125        | 0.320               | <b>0.865</b>  | <b>0.865</b>                           | -0.140         | -0.143          | -0.023         | -0.203                  | -0.126                | -0.153                              | -0.279          | -0.236        | 0.034                 |
| Procyanidin B1 3-O-gallate            | 0.314          | -0.279       | <b>-0.571</b> | 0.352               | <b>0.575</b>  | <b>0.575</b>                           | 0.072          | 0.019           | 0.389          | 0.151                   | 0.351                 | 0.396                               | 0.005           | 0.207         | 0.416                 |
| Gallocatechin gallate                 | 0.324          | -0.344       | <b>-0.558</b> | 0.294               | <b>0.684</b>  | <b>0.684</b>                           | 0.217          | 0.165           | 0.422          | 0.115                   | 0.435                 | 0.257                               | 0.036           | 0.312         | 0.328                 |
| Quercetin 3-O-digalactoside/glucoside | 0.232          | -0.344       | <b>-0.616</b> | 0.382               | <b>0.764</b>  | <b>0.764</b>                           | 0.303          | 0.265           | <b>0.530</b>   | 0.178                   | <b>0.503</b>          | 0.256                               | 0.076           | 0.336         | 0.387                 |
| Myricetin 3-O-galactoside 1           | 0.308          | -0.155       | <b>-0.492</b> | 0.441               | <b>0.526</b>  | <b>0.526</b>                           | -0.198         | -0.242          | 0.123          | -0.055                  | 0.143                 | 0.419                               | -0.207          | 0.055         | 0.378                 |
| Epicatechin                           | 0.206          | -0.306       | <b>-0.635</b> | <b>0.521</b>        | <b>0.751</b>  | <b>0.751</b>                           | 0.258          | 0.236           | <b>0.532</b>   | 0.198                   | <b>0.487</b>          | 0.333                               | 0.053           | 0.309         | <b>0.498</b>          |

|                                  |              |               |               |               |               |               |               |               |               |              |               |              |              |               |              |
|----------------------------------|--------------|---------------|---------------|---------------|---------------|---------------|---------------|---------------|---------------|--------------|---------------|--------------|--------------|---------------|--------------|
| gallate                          |              |               |               |               |               |               |               |               |               |              |               |              |              |               |              |
| Rutin                            | 0.245        | -0.311        | <b>-0.559</b> | <b>0.538</b>  | <b>0.799</b>  | <b>0.799</b>  | 0.069         | 0.038         | <b>0.459</b>  | 0.196        | 0.349         | 0.353        | 0.013        | 0.177         | <b>0.508</b> |
| Quercetin 3-O-galactoside        | 0.071        | -0.131        | <b>-0.540</b> | <b>0.532</b>  | <b>0.534</b>  | <b>0.534</b>  | 0.033         | 0.025         | 0.329         | 0.181        | 0.304         | 0.361        | -0.108       | 0.174         | <b>0.565</b> |
| Kaempferol 3-O-rutinoside 2      | 0.172        | -0.267        | <b>-0.655</b> | <b>0.489</b>  | <b>0.556</b>  | <b>0.556</b>  | 0.181         | 0.149         | <b>0.446</b>  | 0.121        | <b>0.459</b>  | 0.428        | 0.000        | 0.304         | <b>0.474</b> |
| Kaempferol 3-O-glucoside         | -0.021       | -0.092        | <b>-0.475</b> | <b>0.564</b>  | 0.390         | 0.390         | 0.034         | 0.043         | 0.226         | 0.055        | 0.239         | 0.354        | -0.167       | 0.123         | 0.434        |
| Unknown quercetin conjugate      | 0.338        | -0.349        | <b>-0.655</b> | 0.396         | <b>0.786</b>  | <b>0.786</b>  | 0.132         | 0.072         | 0.330         | -0.043       | 0.372         | 0.329        | -0.116       | 0.233         | 0.333        |
| Unknown kaempferol conjugate     | 0.295        | -0.296        | <b>-0.591</b> | <b>0.467</b>  | <b>0.819</b>  | <b>0.819</b>  | 0.094         | 0.054         | 0.435         | 0.088        | 0.361         | 0.324        | 0.014        | 0.204         | 0.376        |
| Total flavonoids                 | 0.243        | -0.232        | <b>-0.466</b> | <b>0.485</b>  | <b>0.944</b>  | <b>0.944</b>  | 0.024         | 0.004         | 0.256         | -0.032       | 0.197         | 0.138        | -0.179       | 0.043         | 0.322        |
| Caffeine                         | 0.271        | -0.355        | <b>-0.515</b> | 0.196         | <b>0.677</b>  | <b>0.677</b>  | 0.280         | 0.226         | 0.385         | 0.095        | 0.417         | 0.162        | 0.006        | 0.303         | 0.262        |
| Ethoxyacetic acid                | <b>0.598</b> | <b>-0.671</b> | <b>-0.537</b> | -0.073        | 0.069         | 0.069         | 0.237         | 0.093         | <b>0.855</b>  | <b>0.791</b> | <b>0.758</b>  | <b>0.755</b> | <b>0.737</b> | <b>0.724</b>  | <b>0.572</b> |
| Acetic acid                      | <b>0.562</b> | -0.004        | 0.041         | 0.289         | 0.321         | 0.321         | <b>-0.694</b> | <b>-0.727</b> | -0.056        | 0.145        | -0.256        | 0.398        | -0.048       | -0.320        | 0.402        |
| Pterin-6-carboxylic acid         | 0.251        | -0.013        | -0.032        | 0.443         | <b>0.838</b>  | <b>0.838</b>  | -0.396        | -0.384        | -0.049        | -0.097       | -0.235        | -0.051       | -0.258       | -0.344        | 0.152        |
| Hexanoic acid                    | -0.214       | 0.129         | <b>0.544</b>  | -0.170        | -0.261        | -0.261        | -0.177        | -0.135        | 0.155         | <b>0.499</b> | -0.114        | -0.220       | 0.424        | -0.089        | 0.326        |
| Octanoic acid                    | 0.133        | -0.240        | 0.232         | <b>-0.584</b> | <b>-0.788</b> | <b>-0.788</b> | 0.109         | 0.036         | 0.314         | <b>0.539</b> | 0.272         | 0.242        | <b>0.714</b> | 0.431         | 0.060        |
| Nonanoic acid                    | 0.293        | -0.280        | 0.044         | <b>-0.522</b> | <b>-0.683</b> | <b>-0.683</b> | 0.058         | -0.043        | 0.375         | <b>0.561</b> | 0.338         | <b>0.445</b> | <b>0.690</b> | <b>0.477</b>  | 0.091        |
| Total acid                       | 0.102        | -0.189        | 0.292         | <b>-0.539</b> | <b>-0.729</b> | <b>-0.729</b> | 0.042         | -0.019        | 0.326         | <b>0.597</b> | 0.226         | 0.205        | <b>0.723</b> | 0.367         | 0.138        |
| 2-Methyl-1-propanol              | 0.301        | -0.157        | 0.148         | 0.310         | 0.379         | 0.379         | -0.373        | -0.375        | 0.369         | <b>0.535</b> | 0.011         | 0.157        | 0.393        | -0.084        | <b>0.552</b> |
| 2-Pentanol                       | 0.049        | -0.358        | <b>-0.573</b> | -0.038        | 0.224         | 0.224         | <b>0.555</b>  | <b>0.492</b>  | <b>0.498</b>  | 0.201        | <b>0.643</b>  | 0.120        | 0.184        | <b>0.609</b>  | 0.137        |
| 1-Butanol                        | 0.211        | -0.115        | -0.198        | <b>0.546</b>  | 0.379         | 0.379         | -0.260        | -0.253        | 0.203         | 0.030        | 0.086         | 0.297        | 0.076        | 0.023         | 0.330        |
| 2-Hexanol                        | 0.217        | -0.255        | -0.271        | <b>0.575</b>  | 0.338         | 0.338         | -0.155        | -0.161        | 0.354         | 0.138        | 0.220         | 0.418        | 0.224        | 0.147         | <b>0.482</b> |
| 3-Methyl-1-butanol               | 0.141        | 0.061         | <b>0.462</b>  | 0.216         | 0.143         | 0.143         | <b>-0.505</b> | <b>-0.465</b> | 0.093         | 0.419        | -0.274        | -0.048       | 0.275        | -0.345        | <b>0.446</b> |
| 1-(2-Aminoethylamino)-2-propanol | 0.237        | -0.163        | <b>-0.454</b> | 0.327         | <b>0.815</b>  | <b>0.815</b>  | 0.123         | 0.102         | 0.353         | 0.058        | 0.291         | 0.102        | -0.033       | 0.150         | 0.242        |
| 2-Octen-4-ol                     | 0.327        | -0.317        | <b>-0.465</b> | 0.378         | <b>0.842</b>  | <b>0.842</b>  | 0.081         | 0.040         | 0.381         | 0.108        | 0.303         | 0.181        | 0.003        | 0.166         | 0.327        |
| 3-Methyl-1-pentanol              | 0.067        | 0.079         | 0.349         | 0.160         | 0.018         | 0.018         | -0.440        | -0.413        | 0.176         | <b>0.538</b> | -0.161        | 0.045        | 0.311        | -0.212        | <b>0.489</b> |
| (E)-3-Hexen-1-ol                 | 0.092        | -0.260        | -0.346        | 0.022         | 0.061         | 0.061         | 0.282         | 0.238         | 0.185         | 0.033        | 0.292         | 0.172        | 0.040        | 0.311         | 0.095        |
| 1-Hexanol                        | -0.136       | -0.419        | <b>-0.599</b> | -0.107        | 0.095         | 0.095         | <b>0.834</b>  | <b>0.780</b>  | <b>0.787</b>  | <b>0.466</b> | <b>0.854</b>  | 0.174        | <b>0.485</b> | <b>0.785</b>  | 0.353        |
| 2-Methyl-4-heptanol              | -0.032       | -0.329        | <b>-0.625</b> | 0.142         | 0.066         | 0.066         | <b>0.489</b>  | 0.439         | <b>0.526</b>  | 0.231        | <b>0.641</b>  | 0.422        | 0.201        | <b>0.592</b>  | 0.357        |
| 2-Ethyl-1-hexanol                | -0.027       | 0.403         | <b>0.502</b>  | 0.369         | <b>0.457</b>  | <b>0.457</b>  | <b>-0.722</b> | <b>-0.633</b> | <b>-0.478</b> | -0.251       | <b>-0.711</b> | -0.373       | -0.417       | <b>-0.762</b> | -0.008       |
| Linalool                         | 0.204        | -0.150        | -0.201        | 0.436         | <b>0.907</b>  | <b>0.907</b>  | -0.134        | -0.134        | 0.102         | -0.061       | -0.030        | -0.027       | -0.203       | -0.157        | 0.200        |
| 1-Octanol                        | 0.172        | 0.099         | <b>0.597</b>  | -0.326        | <b>-0.642</b> | <b>-0.642</b> | <b>-0.468</b> | <b>-0.477</b> | -0.026        | 0.416        | -0.260        | 0.046        | <b>0.491</b> | -0.175        | 0.067        |
| 2,3-Butanediol                   | 0.406        | 0.091         | 0.090         | 0.172         | 0.249         | 0.249         | <b>-0.603</b> | <b>-0.624</b> | -0.073        | 0.252        | -0.257        | 0.284        | -0.115       | -0.318        | 0.441        |

|                                        |               |               |               |               |               |               |               |               |               |              |               |               |               |               |              |
|----------------------------------------|---------------|---------------|---------------|---------------|---------------|---------------|---------------|---------------|---------------|--------------|---------------|---------------|---------------|---------------|--------------|
| Phenylethyl alcohol                    | 0.064         | 0.214         | <b>0.707</b>  | -0.058        | -0.278        | -0.278        | <b>-0.619</b> | <b>-0.579</b> | -0.131        | 0.349        | <b>-0.449</b> | -0.120        | 0.265         | -0.426        | 0.200        |
| Total alcohol                          | 0.175         | 0.008         | 0.382         | 0.281         | 0.149         | 0.149         | <b>-0.506</b> | <b>-0.475</b> | 0.173         | 0.441        | -0.191        | 0.050         | 0.336         | -0.258        | <b>0.498</b> |
| 3-Hydroxybutanal                       | -0.216        | <b>0.589</b>  | -0.039        | 0.167         | 0.295         | 0.295         | -0.012        | 0.082         | 0.102         | -0.009       | 0.016         | -0.183        | -0.057        | -0.075        | -0.056       |
| Octanal                                | <b>1.000</b>  | <b>-0.517</b> | -0.209        | -0.184        | 0.039         | 0.039         | -0.356        | <b>-0.518</b> | 0.201         | 0.389        | 0.138         | <b>0.673</b>  | 0.308         | 0.167         | 0.133        |
| Total aldehyde                         | <b>1</b>      | <b>-0.518</b> | -0.210        | -0.183        | 0.041         | 0.041         | -0.356        | <b>-0.518</b> | 0.203         | 0.391        | 0.139         | <b>0.673</b>  | 0.309         | 0.167         | 0.134        |
| Benzaldehyde                           | <b>-0.518</b> | <b>1</b>      | <b>0.476</b>  | 0.195         | -0.038        | -0.038        | -0.351        | -0.168        | <b>-0.564</b> | -0.433       | <b>-0.583</b> | <b>-0.569</b> | <b>-0.501</b> | <b>-0.594</b> | -0.282       |
| Myristicin                             | -0.210        | <b>0.476</b>  | <b>1</b>      | -0.194        | -0.375        | -0.375        | <b>-0.591</b> | <b>-0.492</b> | <b>-0.576</b> | -0.140       | <b>-0.789</b> | <b>-0.641</b> | -0.046        | <b>-0.716</b> | -0.430       |
| Benzeneacetaldehyde                    | -0.183        | 0.195         | -0.194        | <b>1</b>      | <b>0.580</b>  | <b>0.580</b>  | -0.109        | 0.021         | -0.012        | -0.228       | -0.059        | 0.020         | -0.348        | -0.188        | 0.350        |
| Naphthalene                            | 0.041         | -0.038        | -0.375        | <b>0.580</b>  | <b>1</b>      | <b>1.000</b>  | 0.008         | 0.037         | 0.148         | -0.121       | 0.089         | -0.040        | -0.327        | -0.072        | 0.315        |
| 1,2-Dihydro-1,1,6-trimethylnaphthalene | 0.041         | -0.038        | -0.375        | <b>0.580</b>  | <b>1.000</b>  | <b>1</b>      | 0.008         | 0.037         | 0.148         | -0.121       | 0.089         | -0.040        | -0.327        | -0.072        | 0.315        |
| Benzyl alcohol                         | -0.356        | -0.351        | <b>-0.591</b> | -0.109        | 0.008         | 0.008         | <b>1</b>      | <b>0.974</b>  | <b>0.568</b>  | 0.137        | <b>0.767</b>  | 0.052         | 0.255         | <b>0.735</b>  | 0.110        |
| Total benzenoid                        | <b>-0.518</b> | -0.168        | <b>-0.492</b> | 0.021         | 0.037         | 0.037         | <b>0.974</b>  | <b>1</b>      | <b>0.479</b>  | 0.043        | <b>0.665</b>  | -0.099        | 0.161         | <b>0.619</b>  | 0.076        |
| Ethyl butanoate                        | 0.203         | <b>-0.564</b> | <b>-0.576</b> | -0.012        | 0.148         | 0.148         | <b>0.568</b>  | <b>0.479</b>  | <b>1</b>      | <b>0.772</b> | <b>0.904</b>  | <b>0.486</b>  | <b>0.775</b>  | <b>0.843</b>  | <b>0.544</b> |
| Ethyl 3-methylbutanoate                | 0.391         | -0.433        | -0.140        | -0.228        | -0.121        | -0.121        | 0.137         | 0.043         | <b>0.772</b>  | <b>1</b>     | <b>0.560</b>  | 0.436         | <b>0.807</b>  | <b>0.560</b>  | <b>0.478</b> |
| 3-Methylbutyl acetate                  | 0.139         | <b>-0.583</b> | <b>-0.789</b> | -0.059        | 0.089         | 0.089         | <b>0.767</b>  | <b>0.665</b>  | <b>0.904</b>  | <b>0.560</b> | <b>1</b>      | <b>0.556</b>  | <b>0.570</b>  | <b>0.969</b>  | <b>0.473</b> |
| 3-Hydroxymandelic acid ethyl ester     | <b>0.673</b>  | <b>-0.569</b> | <b>-0.641</b> | 0.020         | -0.040        | -0.040        | 0.052         | -0.099        | <b>0.486</b>  | 0.436        | <b>0.556</b>  | <b>1</b>      | 0.328         | <b>0.576</b>  | <b>0.568</b> |
| Ethyl hexanoate                        | 0.309         | <b>-0.501</b> | -0.046        | -0.348        | -0.327        | -0.327        | 0.255         | 0.161         | <b>0.775</b>  | <b>0.807</b> | <b>0.570</b>  | 0.328         | <b>1</b>      | <b>0.594</b>  | 0.227        |
| Hexyl acetate                          | 0.167         | <b>-0.594</b> | <b>-0.716</b> | -0.188        | -0.072        | -0.072        | <b>0.735</b>  | <b>0.619</b>  | <b>0.843</b>  | <b>0.560</b> | <b>0.969</b>  | <b>0.576</b>  | <b>0.594</b>  | <b>1</b>      | 0.398        |
| Ethyl (E)-3-hexenoate                  | 0.134         | -0.282        | -0.430        | 0.350         | 0.315         | 0.315         | 0.110         | 0.076         | <b>0.544</b>  | <b>0.478</b> | <b>0.473</b>  | <b>0.568</b>  | 0.227         | 0.398         | <b>1</b>     |
| Ethyl lactate                          | 0.373         | 0.182         | <b>0.606</b>  | 0.015         | -0.144        | -0.144        | <b>-0.793</b> | <b>-0.779</b> | -0.220        | 0.256        | <b>-0.524</b> | 0.040         | 0.152         | <b>-0.529</b> | 0.168        |
| Propyl hexanoate                       | <b>0.584</b>  | -0.412        | 0.062         | -0.216        | -0.171        | -0.171        | -0.222        | -0.326        | <b>0.569</b>  | <b>0.787</b> | 0.272         | <b>0.448</b>  | <b>0.828</b>  | 0.284         | 0.308        |
| Ethyl octanoate                        | <b>0.530</b>  | -0.403        | 0.084         | <b>-0.568</b> | <b>-0.708</b> | <b>-0.708</b> | -0.018        | -0.144        | 0.344         | <b>0.572</b> | 0.294         | <b>0.492</b>  | <b>0.748</b>  | 0.434         | -0.006       |
| Ethyl 3-hydroxybutanoate               | -0.010        | 0.274         | <b>0.735</b>  | -0.264        | <b>-0.628</b> | <b>-0.628</b> | -0.344        | -0.287        | -0.279        | 0.083        | -0.432        | -0.344        | 0.274         | -0.382        | -0.355       |
| Ethyl nonanoate                        | 0.270         | <b>-0.459</b> | -0.355        | -0.306        | -0.325        | -0.325        | 0.439         | 0.337         | <b>0.806</b>  | <b>0.747</b> | <b>0.742</b>  | <b>0.543</b>  | <b>0.851</b>  | <b>0.763</b>  | 0.356        |
| Isoamyl lactate                        | 0.286         | 0.190         | 0.180         | 0.338         | 0.351         | 0.351         | <b>-0.737</b> | <b>-0.725</b> | -0.169        | 0.097        | -0.404        | 0.201         | -0.190        | <b>-0.464</b> | <b>0.445</b> |
| Methyl decanoate                       | 0.271         | -0.111        | -0.174        | -0.149        | -0.311        | -0.311        | -0.004        | -0.064        | <b>0.480</b>  | <b>0.533</b> | 0.354         | <b>0.452</b>  | <b>0.586</b>  | 0.349         | 0.223        |
| Ethyl 2-furancarboxylate               | -0.057        | 0.382         | <b>0.825</b>  | -0.095        | -0.395        | -0.395        | <b>-0.645</b> | <b>-0.573</b> | <b>-0.508</b> | -0.113       | <b>-0.732</b> | -0.420        | -0.007        | <b>-0.713</b> | -0.291       |
| Ethyl decanoate                        | 0.409         | -0.403        | -0.015        | <b>-0.560</b> | <b>-0.665</b> | <b>-0.665</b> | 0.132         | 0.012         | 0.248         | 0.441        | 0.330         | <b>0.461</b>  | <b>0.529</b>  | <b>0.513</b>  | -0.072       |
| Diethyl succinate                      | -0.183        | <b>0.475</b>  | <b>0.932</b>  | -0.089        | -0.278        | -0.278        | <b>-0.640</b> | <b>-0.541</b> | <b>-0.634</b> | -0.242       | <b>-0.837</b> | <b>-0.589</b> | -0.163        | <b>-0.811</b> | -0.369       |
| Ethyl 9-decenoate                      | 0.408         | -0.256        | 0.264         | <b>-0.576</b> | <b>-0.637</b> | <b>-0.637</b> | -0.115        | -0.211        | 0.088         | <b>0.455</b> | 0.077         | 0.286         | <b>0.459</b>  | 0.227         | -0.102       |
| Ethyl benzenoacetate                   | -0.393        | <b>0.449</b>  | 0.310         | <b>0.463</b>  | <b>0.559</b>  | <b>0.559</b>  | -0.314        | -0.184        | -0.437        | -0.328       | <b>-0.527</b> | <b>-0.498</b> | <b>-0.623</b> | <b>-0.589</b> | 0.063        |
| 2-Phenethyl                            | 0.038         | 0.002         | 0.052         | -0.093        | -0.137        | -0.137        | -0.034        | -0.046        | 0.186         | 0.273        | 0.117         | 0.162         | 0.244         | 0.120         | 0.152        |

|                      |              |               |               |              |              |              |        |        |              |              |              |              |        |              |              |  |
|----------------------|--------------|---------------|---------------|--------------|--------------|--------------|--------|--------|--------------|--------------|--------------|--------------|--------|--------------|--------------|--|
| acetate              |              |               |               |              |              |              |        |        |              |              |              |              |        |              |              |  |
| Ethyl dodecanoate    | -0.116       | -0.140        | -0.200        | -0.099       | -0.209       | -0.209       | 0.256  | 0.224  | 0.349        | 0.071        | 0.354        | 0.241        | 0.389  | 0.399        | 0.226        |  |
| Total ester          | <b>0.686</b> | <b>-0.576</b> | <b>-0.605</b> | -0.015       | -0.084       | -0.084       | 0.043  | -0.111 | <b>0.495</b> | <b>0.467</b> | <b>0.553</b> | <b>0.998</b> | 0.371  | <b>0.581</b> | <b>0.557</b> |  |
| 3-Hydroxy-2-butanone | -0.060       | -0.210        | -0.077        | -0.329       | -0.355       | -0.355       | 0.290  | 0.236  | 0.222        | 0.134        | 0.324        | 0.263        | 0.310  | <b>0.482</b> | 0.109        |  |
| Limonene             | -0.034       | 0.080         | -0.367        | <b>0.618</b> | <b>0.975</b> | <b>0.975</b> | -0.005 | 0.045  | 0.132        | -0.141       | 0.074        | -0.068       | -0.352 | -0.089       | 0.335        |  |
| Terpinolene          | 0.136        | -0.113        | -0.412        | 0.240        | <b>0.690</b> | <b>0.690</b> | 0.249  | 0.242  | 0.373        | 0.077        | 0.342        | 0.014        | 0.017  | 0.220        | 0.166        |  |
| Total terpene        | 0.027        | -0.016        | -0.412        | <b>0.573</b> | <b>0.982</b> | <b>0.982</b> | 0.061  | 0.093  | 0.221        | -0.070       | 0.159        | -0.032       | -0.267 | -0.007       | 0.344        |  |

---

Values in **bold** indicate significant ( $p < 0.05$ ) correlation

**Table S6** Correlation matrix of quantified phenolic and volatile compounds, physicochemical properties and tested responses of tea-macerated Chardonnay wines

(continued 6/7)

| Variables                             | Ethyl lactate | Propyl hexanoate | Ethyl octanoate | Ethyl 3-hydroxybutanoate | Ethyl nonanoate | Isoamyl lactate | Methyl decanoate | Ethyl 2-furancarboxylate | Ethyl decanoate | Diethyl succinate | Ethyl 9-decanoate | Ethyl benzeneacetate | 2-Phenethyl acetate | Ethyl dodecanoate | Total ester |
|---------------------------------------|---------------|------------------|-----------------|--------------------------|-----------------|-----------------|------------------|--------------------------|-----------------|-------------------|-------------------|----------------------|---------------------|-------------------|-------------|
| TA                                    | 0.256         | 0.105            | <b>0.571</b>    | <b>0.660</b>             | 0.112           | -0.174          | 0.253            | <b>0.470</b>             | 0.439           | 0.391             | 0.413             | <b>-0.470</b>        | 0.126               | 0.173             | 0.049       |
| pH                                    | -0.258        | -0.089           | <b>-0.607</b>   | <b>-0.621</b>            | -0.139          | 0.178           | -0.210           | <b>-0.453</b>            | <b>-0.499</b>   | -0.383            | <b>-0.481</b>     | <b>0.459</b>         | -0.129              | -0.078            | -0.042      |
| TPC                                   | -0.137        | -0.036           | <b>-0.514</b>   | <b>-0.574</b>            | -0.264          | 0.226           | -0.278           | -0.367                   | <b>-0.470</b>   | -0.253            | <b>-0.457</b>     | 0.373                | -0.153              | -0.124            | -0.029      |
| TFC                                   | -0.214        | 0.020            | -0.420          | <b>-0.619</b>            | -0.125          | 0.183           | -0.147           | <b>-0.461</b>            | -0.387          | <b>-0.479</b>     | -0.444            | 0.165                | -0.245              | -0.076            | 0.179       |
| DPPH                                  | -0.171        | -0.064           | <b>-0.578</b>   | <b>-0.590</b>            | -0.244          | 0.230           | -0.236           | -0.410                   | <b>-0.524</b>   | -0.291            | <b>-0.496</b>     | 0.412                | -0.094              | -0.162            | -0.028      |
| FRAP                                  | -0.275        | -0.078           | -0.403          | <b>-0.526</b>            | -0.185          | 0.021           | -0.157           | -0.421                   | -0.325          | <b>-0.449</b>     | -0.374            | 0.105                | -0.283              | -0.041            | 0.072       |
| ABTS                                  | -0.202        | 0.024            | -0.373          | <b>-0.531</b>            | -0.128          | 0.105           | -0.081           | -0.431                   | -0.319          | -0.421            | -0.349            | 0.105                | -0.136              | -0.057            | 0.138       |
| L*                                    | -0.075        | 0.253            | <b>0.724</b>    | 0.350                    | 0.335           | <b>-0.491</b>   | 0.341            | 0.082                    | <b>0.783</b>    | -0.127            | <b>0.656</b>      | <b>-0.785</b>        | -0.083              | 0.222             | 0.255       |
| a*                                    | 0.102         | -0.255           | <b>-0.629</b>   | -0.274                   | <b>-0.464</b>   | 0.405           | <b>-0.519</b>    | 0.012                    | <b>-0.578</b>   | 0.308             | -0.409            | <b>0.843</b>         | 0.045               | -0.286            | -0.364      |
| b*                                    | -0.040        | -0.305           | <b>-0.777</b>   | <b>-0.455</b>            | -0.338          | 0.402           | -0.434           | -0.195                   | <b>-0.799</b>   | 0.046             | <b>-0.678</b>     | <b>0.785</b>         | 0.051               | -0.269            | -0.295      |
| Quinic acid                           | 0.006         | -0.167           | <b>-0.648</b>   | <b>-0.487</b>            | <b>-0.453</b>   | 0.419           | <b>-0.494</b>    | -0.144                   | <b>-0.630</b>   | 0.057             | <b>-0.549</b>     | <b>0.716</b>         | -0.157              | -0.247            | -0.288      |
| Gallic acid                           | -0.189        | -0.035           | -0.285          | <b>-0.483</b>            | -0.162          | 0.032           | -0.248           | -0.437                   | -0.173          | -0.346            | -0.165            | 0.092                | -0.116              | -0.144            | 0.175       |
| Chlorogenic acid                      | -0.186        | 0.051            | -0.380          | <b>-0.526</b>            | -0.167          | 0.119           | -0.142           | -0.394                   | -0.329          | -0.368            | -0.346            | 0.168                | -0.193              | -0.071            | 0.082       |
| Total phenolic acids                  | -0.081        | -0.124           | <b>-0.590</b>   | <b>-0.561</b>            | -0.390          | 0.316           | <b>-0.446</b>    | -0.293                   | <b>-0.533</b>   | -0.119            | <b>-0.476</b>     | <b>0.549</b>         | -0.170              | -0.229            | -0.132      |
| Galocatechin                          | -0.211        | -0.060           | <b>-0.546</b>   | <b>-0.649</b>            | -0.184          | 0.227           | -0.174           | <b>-0.473</b>            | <b>-0.491</b>   | -0.403            | <b>-0.486</b>     | 0.307                | -0.101              | -0.106            | 0.110       |
| Epigallocatechin                      | -0.190        | 0.060            | -0.336          | <b>-0.517</b>            | -0.129          | 0.106           | -0.048           | -0.406                   | -0.285          | -0.422            | -0.324            | 0.063                | -0.173              | -0.026            | 0.166       |
| Procyanidin B1                        | -0.217        | 0.041            | -0.387          | <b>-0.608</b>            | -0.073          | 0.172           | -0.088           | <b>-0.473</b>            | -0.382          | <b>-0.482</b>     | -0.427            | 0.090                | -0.147              | -0.036            | 0.213       |
| Catechin                              | -0.068        | 0.002            | <b>-0.552</b>   | <b>-0.610</b>            | -0.245          | 0.381           | -0.171           | -0.356                   | <b>-0.526</b>   | -0.271            | <b>-0.500</b>     | 0.408                | -0.083              | -0.124            | 0.070       |
| Procyanidin B2                        | <b>-0.470</b> | -0.266           | -0.334          | -0.390                   | -0.132          | -0.328          | -0.281           | <b>-0.467</b>            | -0.202          | <b>-0.481</b>     | -0.276            | -0.024               | -0.334              | -0.048            | 0.011       |
| Epicatechin                           | -0.228        | 0.200            | -0.268          | <b>-0.506</b>            | 0.234           | 0.048           | 0.148            | <b>-0.490</b>            | -0.305          | <b>-0.491</b>     | -0.319            | -0.013               | 0.062               | 0.057             | 0.267       |
| Epigallocatechin gallate              | -0.044        | -0.091           | <b>-0.572</b>   | <b>-0.524</b>            | -0.368          | 0.336           | -0.443           | -0.244                   | <b>-0.553</b>   | -0.055            | <b>-0.488</b>     | <b>0.576</b>         | -0.146              | -0.200            | -0.184      |
| Procyanidin B1 3-O-gallate            | -0.131        | 0.153            | -0.280          | <b>-0.464</b>            | -0.024          | 0.271           | 0.264            | -0.336                   | -0.327          | <b>-0.468</b>     | -0.393            | -0.022               | -0.062              | 0.117             | 0.365       |
| Galocatechin gallate                  | -0.196        | 0.070            | -0.233          | -0.437                   | -0.046          | 0.026           | 0.078            | -0.397                   | -0.185          | <b>-0.470</b>     | -0.241            | -0.096               | -0.135              | 0.032             | 0.234       |
| Quercetin 3-O-digalactoside/glucoside | -0.248        | 0.093            | -0.322          | <b>-0.505</b>            | 0.051           | 0.048           | 0.114            | <b>-0.499</b>            | -0.317          | <b>-0.493</b>     | -0.344            | -0.002               | 0.040               | 0.012             | 0.229       |
| Myricetin 3-O-galactoside 1           | 0.011         | 0.053            | -0.249          | <b>-0.478</b>            | -0.153          | 0.432           | 0.080            | -0.238                   | -0.240          | -0.334            | -0.285            | 0.029                | -0.032              | 0.020             | 0.389       |
| Epicatechin gallate                   | -0.181        | 0.120            | -0.340          | <b>-0.561</b>            | 0.072           | 0.172           | 0.085            | <b>-0.466</b>            | -0.317          | <b>-0.490</b>     | -0.337            | 0.073                | -0.006              | 0.006             | 0.305       |
| Rutin                                 | -0.043        | 0.211            | -0.379          | <b>-0.612</b>            | 0.015           | 0.398           | 0.162            | -0.378                   | -0.400          | -0.399            | -0.406            | 0.198                | 0.043               | 0.051             | 0.322       |
| Quercetin 3-O-galactoside             | -0.024        | 0.130            | -0.337          | <b>-0.465</b>            | 0.020           | 0.371           | 0.306            | -0.253                   | -0.329          | -0.350            | -0.343            | 0.133                | 0.101               | 0.159             | 0.332       |



|                                  |               |              |               |               |               |               |              |               |               |               |               |               |               |              |              |
|----------------------------------|---------------|--------------|---------------|---------------|---------------|---------------|--------------|---------------|---------------|---------------|---------------|---------------|---------------|--------------|--------------|
| Kaempferol 3-O-rutinoside 2      | -0.197        | 0.037        | -0.262        | <b>-0.533</b> | 0.054         | 0.190         | 0.090        | <b>-0.453</b> | -0.248        | <b>-0.503</b> | -0.284        | -0.059        | 0.080         | 0.005        | 0.399        |
| Kaempferol 3-O-glucoside         | -0.176        | -0.038       | -0.349        | <b>-0.452</b> | -0.041        | 0.263         | 0.066        | -0.330        | -0.287        | -0.344        | -0.283        | 0.175         | 0.106         | -0.027       | 0.323        |
| Unknown quercetin conjugate      | -0.249        | -0.034       | -0.356        | <b>-0.615</b> | -0.091        | 0.153         | -0.121       | <b>-0.512</b> | -0.331        | <b>-0.529</b> | -0.393        | 0.022         | -0.130        | -0.063       | 0.293        |
| Unknown kaempferol conjugate     | -0.116        | 0.161        | -0.338        | <b>-0.653</b> | 0.059         | 0.311         | 0.016        | <b>-0.464</b> | -0.376        | <b>-0.447</b> | -0.414        | 0.139         | -0.007        | 0.018        | 0.293        |
| Total flavonoids                 | -0.119        | 0.004        | <b>-0.520</b> | <b>-0.612</b> | -0.213        | 0.308         | -0.146       | -0.396        | <b>-0.485</b> | -0.334        | <b>-0.476</b> | 0.327         | -0.104        | -0.101       | 0.102        |
| Caffeine                         | -0.286        | -0.010       | -0.283        | -0.414        | -0.091        | -0.077        | -0.007       | -0.420        | -0.210        | <b>-0.477</b> | -0.266        | -0.047        | -0.208        | -0.015       | 0.137        |
| Ethoxyacetic acid                | 0.095         | <b>0.744</b> | <b>0.554</b>  | -0.191        | <b>0.795</b>  | 0.051         | <b>0.576</b> | -0.367        | 0.408         | <b>-0.507</b> | 0.340         | <b>-0.545</b> | 0.285         | 0.273        | <b>0.771</b> |
| Acetic acid                      | <b>0.694</b>  | 0.364        | 0.016         | -0.097        | -0.076        | <b>0.878</b>  | 0.059        | 0.178         | -0.198        | 0.164         | -0.037        | 0.211         | 0.157         | -0.233       | 0.393        |
| Pterin-6-carboxylic acid         | 0.230         | 0.088        | <b>-0.505</b> | -0.436        | -0.406        | <b>0.618</b>  | -0.211       | -0.061        | <b>-0.528</b> | 0.069         | -0.428        | <b>0.592</b>  | -0.045        | -0.164       | -0.077       |
| Hexanoic acid                    | <b>0.546</b>  | <b>0.481</b> | 0.233         | <b>0.455</b>  | 0.264         | 0.246         | 0.265        | <b>0.497</b>  | 0.082         | <b>0.493</b>  | 0.295         | 0.150         | 0.222         | 0.181        | -0.182       |
| Octanoic acid                    | 0.183         | <b>0.544</b> | <b>0.877</b>  | <b>0.485</b>  | <b>0.651</b>  | -0.302        | <b>0.457</b> | 0.184         | <b>0.816</b>  | 0.091         | <b>0.780</b>  | <b>-0.620</b> | 0.266         | 0.390        | 0.295        |
| Nonanoic acid                    | 0.164         | <b>0.647</b> | <b>0.874</b>  | 0.348         | <b>0.644</b>  | -0.200        | <b>0.716</b> | 0.123         | <b>0.834</b>  | -0.044        | <b>0.747</b>  | <b>-0.714</b> | 0.292         | <b>0.519</b> | <b>0.491</b> |
| Total acid                       | 0.287         | <b>0.615</b> | <b>0.825</b>  | <b>0.504</b>  | <b>0.633</b>  | -0.183        | <b>0.520</b> | 0.266         | <b>0.740</b>  | 0.168         | <b>0.747</b>  | <b>-0.528</b> | 0.292         | 0.413        | 0.259        |
| 2-Methyl-1-propanol              | <b>0.656</b>  | <b>0.687</b> | 0.056         | 0.055         | 0.198         | <b>0.640</b>  | 0.277        | 0.256         | -0.173        | 0.234         | 0.028         | 0.219         | 0.221         | 0.077        | 0.171        |
| 2-Pentanol                       | <b>-0.547</b> | -0.064       | -0.044        | -0.273        | 0.213         | <b>-0.458</b> | 0.120        | <b>-0.519</b> | -0.006        | <b>-0.627</b> | -0.170        | -0.345        | -0.130        | 0.081        | 0.105        |
| 1-Butanol                        | 0.233         | 0.233        | -0.048        | -0.237        | -0.006        | 0.426         | 0.132        | -0.032        | -0.148        | -0.105        | -0.171        | -0.008        | 0.065         | 0.115        | 0.288        |
| 2-Hexanol                        | 0.230         | 0.336        | 0.031         | -0.211        | 0.209         | 0.391         | 0.217        | -0.086        | -0.150        | -0.183        | -0.202        | -0.077        | 0.111         | 0.216        | 0.411        |
| 3-Methyl-1-butanol               | <b>0.828</b>  | <b>0.574</b> | 0.050         | 0.332         | 0.060         | <b>0.669</b>  | 0.210        | <b>0.544</b>  | -0.205        | <b>0.542</b>  | 0.081         | 0.321         | 0.221         | -0.015       | -0.025       |
| 1-(2-Aminoethylamino)-2-propanol | -0.151        | 0.087        | -0.394        | <b>-0.500</b> | -0.119        | 0.163         | 0.081        | -0.330        | -0.371        | -0.379        | -0.401        | 0.128         | -0.203        | 0.046        | 0.074        |
| 2-Octen-4-ol                     | -0.093        | 0.142        | -0.352        | <b>-0.520</b> | -0.112        | 0.228         | 0.014        | -0.346        | -0.336        | -0.376        | -0.365        | 0.137         | -0.154        | 0.003        | 0.154        |
| 3-Methyl-1-pentanol              | <b>0.709</b>  | <b>0.617</b> | 0.089         | 0.292         | 0.180         | <b>0.630</b>  | 0.402        | <b>0.495</b>  | -0.138        | 0.384         | 0.081         | 0.242         | 0.176         | 0.080        | 0.065        |
| (E)-3-Hexen-1-ol                 | -0.353        | -0.034       | -0.013        | -0.205        | 0.027         | -0.236        | -0.046       | -0.115        | 0.151         | <b>-0.522</b> | -0.097        | -0.209        | <b>-0.896</b> | 0.047        | 0.154        |
| 1-Hexanol                        | <b>-0.519</b> | 0.131        | 0.084         | -0.248        | <b>0.620</b>  | <b>-0.509</b> | 0.236        | <b>-0.515</b> | 0.073         | <b>-0.654</b> | -0.088        | -0.383        | -0.083        | 0.227        | 0.171        |
| 2-Methyl-4-heptanol              | <b>-0.527</b> | 0.036        | 0.003         | -0.368        | 0.323         | -0.268        | 0.211        | <b>-0.527</b> | 0.093         | <b>-0.631</b> | -0.077        | -0.292        | 0.026         | 0.303        | 0.406        |
| 2-Ethyl-1-hexanol                | <b>0.546</b>  | -0.029       | <b>-0.489</b> | -0.023        | <b>-0.573</b> | <b>0.749</b>  | -0.361       | 0.401         | <b>-0.577</b> | <b>0.565</b>  | -0.345        | <b>0.808</b>  | -0.028        | -0.266       | -0.385       |
| Linalool                         | 0.030         | 0.043        | <b>-0.526</b> | <b>-0.513</b> | -0.288        | 0.407         | -0.235       | -0.246        | <b>-0.508</b> | -0.088        | -0.439        | <b>0.525</b>  | -0.039        | -0.165       | -0.056       |
| 1-Octanol                        | <b>0.726</b>  | <b>0.658</b> | <b>0.628</b>  | <b>0.739</b>  | 0.312         | 0.250         | <b>0.520</b> | <b>0.738</b>  | 0.386         | <b>0.552</b>  | <b>0.543</b>  | -0.288        | 0.154         | 0.243        | 0.096        |
| 2,3-Butanediol                   | <b>0.660</b>  | 0.251        | -0.064        | -0.118        | -0.117        | <b>0.874</b>  | -0.001       | 0.153         | -0.214        | 0.191         | -0.003        | 0.358         | 0.217         | -0.372       | 0.279        |
| Phenylethyl alcohol              | <b>0.873</b>  | <b>0.537</b> | 0.274         | <b>0.572</b>  | 0.061         | <b>0.543</b>  | 0.249        | <b>0.733</b>  | 0.054         | <b>0.731</b>  | 0.365         | 0.196         | 0.263         | 0.020        | -0.081       |
| Total alcohol                    | <b>0.817</b>  | <b>0.627</b> | 0.106         | 0.285         | 0.124         | <b>0.676</b>  | 0.279        | <b>0.504</b>  | -0.162        | <b>0.463</b>  | 0.092         | 0.228         | 0.227         | 0.058        | 0.073        |
| 3-Hydroxybutanal                 | -0.010        | 0.008        | -0.266        | -0.100        | 0.030         | 0.100         | 0.277        | -0.031        | -0.301        | -0.014        | -0.209        | 0.158         | 0.050         | 0.059        | -0.192       |
| Octanal                          | 0.373         | <b>0.583</b> | <b>0.530</b>  | -0.009        | 0.269         | 0.285         | 0.270        | -0.057        | 0.410         | -0.183        | 0.408         | -0.393        | 0.038         | -0.116       | <b>0.686</b> |

|                                        |               |              |               |               |               |               |               |               |               |               |               |               |          |              |               |
|----------------------------------------|---------------|--------------|---------------|---------------|---------------|---------------|---------------|---------------|---------------|---------------|---------------|---------------|----------|--------------|---------------|
| Total aldehyde                         | 0.373         | <b>0.584</b> | <b>0.530</b>  | -0.010        | 0.270         | 0.286         | 0.271         | -0.057        | 0.409         | -0.183        | 0.408         | -0.393        | 0.038    | -0.116       | <b>0.686</b>  |
| Benzaldehyde                           | 0.182         | -0.412       | -0.403        | 0.274         | <b>-0.459</b> | 0.190         | -0.111        | 0.382         | -0.403        | <b>0.475</b>  | -0.256        | <b>0.449</b>  | 0.002    | -0.140       | <b>-0.576</b> |
| Myristicin                             | <b>0.606</b>  | 0.062        | 0.084         | <b>0.735</b>  | -0.355        | 0.180         | -0.174        | <b>0.825</b>  | -0.015        | <b>0.932</b>  | 0.264         | 0.310         | 0.052    | -0.200       | <b>-0.605</b> |
| Benzeneacetaldehyde                    | 0.015         | -0.216       | <b>-0.568</b> | -0.264        | -0.306        | 0.338         | -0.149        | -0.095        | <b>-0.560</b> | -0.089        | <b>-0.576</b> | <b>0.463</b>  | -0.093   | -0.099       | -0.015        |
| Naphthalene                            | -0.144        | -0.171       | <b>-0.708</b> | <b>-0.628</b> | -0.325        | 0.351         | -0.311        | -0.395        | <b>-0.665</b> | -0.278        | <b>-0.637</b> | <b>0.559</b>  | -0.137   | -0.209       | -0.084        |
| 1,2-Dihydro-1,1,6-trimethylnaphthalene | -0.144        | -0.171       | <b>-0.708</b> | <b>-0.628</b> | -0.325        | 0.351         | -0.311        | -0.395        | <b>-0.665</b> | -0.278        | <b>-0.637</b> | <b>0.559</b>  | -0.137   | -0.209       | -0.084        |
| Benzyl alcohol                         | <b>-0.793</b> | -0.222       | -0.018        | -0.344        | 0.439         | <b>-0.737</b> | -0.004        | <b>-0.645</b> | 0.132         | <b>-0.640</b> | -0.115        | -0.314        | -0.034   | 0.256        | 0.043         |
| Total benzenoid                        | <b>-0.779</b> | -0.326       | -0.144        | -0.287        | 0.337         | <b>-0.725</b> | -0.064        | <b>-0.573</b> | 0.012         | <b>-0.541</b> | -0.211        | -0.184        | -0.046   | 0.224        | -0.111        |
| Ethyl butanoate                        | -0.220        | <b>0.569</b> | 0.344         | -0.279        | <b>0.806</b>  | -0.169        | <b>0.480</b>  | <b>-0.508</b> | 0.248         | <b>-0.634</b> | 0.088         | -0.437        | 0.186    | 0.349        | <b>0.495</b>  |
| Ethyl 3-methylbutanoate                | 0.256         | <b>0.787</b> | <b>0.572</b>  | 0.083         | <b>0.747</b>  | 0.097         | <b>0.533</b>  | -0.113        | 0.441         | -0.242        | <b>0.455</b>  | -0.328        | 0.273    | 0.071        | <b>0.467</b>  |
| 3-Methylbutyl acetate                  | <b>-0.524</b> | 0.272        | 0.294         | -0.432        | <b>0.742</b>  | -0.404        | 0.354         | <b>-0.732</b> | 0.330         | <b>-0.837</b> | 0.077         | <b>-0.527</b> | 0.117    | 0.354        | <b>0.553</b>  |
| 3-Hydroxymandelic acid ethyl ester     | 0.040         | <b>0.448</b> | <b>0.492</b>  | -0.344        | <b>0.543</b>  | 0.201         | <b>0.452</b>  | -0.420        | <b>0.461</b>  | <b>-0.589</b> | 0.286         | <b>-0.498</b> | 0.162    | 0.241        | <b>0.998</b>  |
| Ethyl hexanoate                        | 0.152         | <b>0.828</b> | <b>0.748</b>  | 0.274         | <b>0.851</b>  | -0.190        | <b>0.586</b>  | -0.007        | <b>0.529</b>  | -0.163        | <b>0.459</b>  | <b>-0.623</b> | 0.244    | 0.389        | 0.371         |
| Hexyl acetate                          | <b>-0.529</b> | 0.284        | 0.434         | -0.382        | <b>0.763</b>  | <b>-0.464</b> | 0.349         | <b>-0.713</b> | <b>0.513</b>  | <b>-0.811</b> | 0.227         | <b>-0.589</b> | 0.120    | 0.399        | <b>0.581</b>  |
| Ethyl (E)-3-hexenoate                  | 0.168         | 0.308        | -0.006        | -0.355        | 0.356         | <b>0.445</b>  | 0.223         | -0.291        | -0.072        | -0.369        | -0.102        | 0.063         | 0.152    | 0.226        | <b>0.557</b>  |
| Ethyl lactate                          | <b>1</b>      | <b>0.527</b> | 0.273         | <b>0.523</b>  | -0.032        | <b>0.709</b>  | 0.221         | <b>0.718</b>  | -0.007        | <b>0.683</b>  | 0.301         | 0.142         | 0.216    | -0.154       | 0.071         |
| Propyl hexanoate                       | <b>0.527</b>  | <b>1</b>     | <b>0.682</b>  | 0.274         | <b>0.654</b>  | 0.276         | <b>0.689</b>  | 0.224         | 0.409         | 0.027         | 0.444         | -0.435        | 0.230    | 0.313        | <b>0.487</b>  |
| Ethyl octanoate                        | 0.273         | <b>0.682</b> | <b>1</b>      | 0.425         | <b>0.703</b>  | -0.196        | <b>0.526</b>  | 0.120         | <b>0.873</b>  | -0.016        | <b>0.808</b>  | <b>-0.765</b> | 0.267    | 0.286        | <b>0.542</b>  |
| Ethyl 3-hydroxybutanoate               | <b>0.523</b>  | 0.274        | 0.425         | <b>1</b>      | 0.046         | -0.131        | 0.239         | <b>0.789</b>  | 0.204         | <b>0.687</b>  | 0.396         | -0.266        | 0.071    | -0.072       | -0.299        |
| Ethyl nonanoate                        | -0.032        | <b>0.654</b> | <b>0.703</b>  | 0.046         | <b>1</b>      | -0.236        | <b>0.593</b>  | -0.304        | <b>0.522</b>  | -0.414        | 0.385         | <b>-0.642</b> | 0.348    | 0.395        | <b>0.572</b>  |
| Isoamyl lactate                        | <b>0.709</b>  | 0.276        | -0.196        | -0.131        | -0.236        | <b>1</b>      | 0.072         | 0.292         | -0.367        | 0.284         | -0.195        | <b>0.485</b>  | 0.117    | -0.125       | 0.190         |
| Methyl decanoate                       | 0.221         | <b>0.689</b> | <b>0.526</b>  | 0.239         | <b>0.593</b>  | 0.072         | <b>1</b>      | 0.144         | 0.304         | -0.148        | 0.227         | <b>-0.613</b> | 0.262    | <b>0.532</b> | <b>0.475</b>  |
| Ethyl 2-furancarboxylate               | <b>0.718</b>  | 0.224        | 0.120         | <b>0.789</b>  | -0.304        | 0.292         | 0.144         | <b>1</b>      | -0.072        | <b>0.841</b>  | 0.186         | 0.070         | -0.161   | -0.070       | -0.389        |
| Ethyl decanoate                        | -0.007        | 0.409        | <b>0.873</b>  | 0.204         | <b>0.522</b>  | -0.367        | 0.304         | -0.072        | <b>1</b>      | -0.156        | <b>0.879</b>  | <b>-0.651</b> | 0.120    | 0.208        | <b>0.502</b>  |
| Diethyl succinate                      | <b>0.683</b>  | 0.027        | -0.016        | <b>0.687</b>  | -0.414        | 0.284         | -0.148        | <b>0.841</b>  | -0.156        | <b>1</b>      | 0.196         | 0.345         | 0.193    | -0.195       | <b>-0.559</b> |
| Ethyl 9-decenoate                      | 0.301         | 0.444        | <b>0.808</b>  | 0.396         | 0.385         | -0.195        | 0.227         | 0.186         | <b>0.879</b>  | 0.196         | <b>1</b>      | <b>-0.473</b> | 0.255    | -0.035       | 0.337         |
| Ethyl benzeneacetate                   | 0.142         | -0.435       | <b>-0.765</b> | -0.266        | <b>-0.642</b> | <b>0.485</b>  | <b>-0.613</b> | 0.070         | <b>-0.651</b> | 0.345         | <b>-0.473</b> | <b>1</b>      | -0.054   | -0.412       | <b>-0.527</b> |
| 2-Phenethyl acetate                    | 0.216         | 0.230        | 0.267         | 0.071         | 0.348         | 0.117         | 0.262         | -0.161        | 0.120         | 0.193         | 0.255         | -0.054        | <b>1</b> | 0.139        | 0.184         |
| Ethyl dodecanoate                      | -0.154        | 0.313        | 0.286         | -0.072        | 0.395         | -0.125        | <b>0.532</b>  | -0.070        | 0.208         | -0.195        | -0.035        | -0.412        | 0.139    | <b>1</b>     | 0.251         |
| Total ester                            | 0.071         | <b>0.487</b> | <b>0.542</b>  | -0.299        | <b>0.572</b>  | 0.190         | <b>0.475</b>  | -0.389        | <b>0.502</b>  | <b>-0.559</b> | 0.337         | <b>-0.527</b> | 0.184    | 0.251        | <b>1</b>      |
| 3-Hydroxy-2-butanone                   | -0.269        | 0.123        | <b>0.449</b>  | -0.148        | 0.326         | -0.273        | 0.132         | -0.302        | <b>0.637</b>  | -0.191        | 0.407         | -0.283        | 0.283    | <b>0.619</b> | 0.282         |
| Limonene                               | -0.141        | -0.209       | <b>-0.742</b> | <b>-0.610</b> | -0.301        | 0.383         | -0.297        | -0.393        | <b>-0.742</b> | -0.285        | <b>-0.728</b> | <b>0.590</b>  | -0.131   | -0.195       | -0.115        |

|               |        |        |               |               |        |        |        |        |               |        |               |              |        |        |        |
|---------------|--------|--------|---------------|---------------|--------|--------|--------|--------|---------------|--------|---------------|--------------|--------|--------|--------|
| Terpinolene   | -0.247 | 0.030  | -0.345        | -0.396        | -0.085 | -0.032 | 0.101  | -0.317 | -0.290        | -0.397 | -0.338        | 0.046        | -0.271 | 0.063  | -0.009 |
| Total terpene | -0.168 | -0.143 | <b>-0.687</b> | <b>-0.608</b> | -0.256 | 0.319  | -0.232 | -0.410 | <b>-0.678</b> | -0.339 | <b>-0.680</b> | <b>0.502</b> | -0.167 | -0.152 | -0.076 |

---

Values in **bold** indicate significant ( $p < 0.05$ ) correlation

**Table S6** Correlation matrix of quantified phenolic and volatile compounds, physicochemical properties and tested responses of tea-macerated Chardonnay wines

(continued 7/7)

| Variables                              | 3-Hydroxy-2-butanone | Limonene      | Terpinolene   | Total terpene |
|----------------------------------------|----------------------|---------------|---------------|---------------|
| TA                                     | 0.195                | <b>-0.768</b> | <b>-0.626</b> | <b>-0.809</b> |
| pH                                     | -0.185               | <b>0.823</b>  | <b>0.693</b>  | <b>0.868</b>  |
| TPC                                    | -0.247               | <b>0.847</b>  | <b>0.746</b>  | <b>0.895</b>  |
| TFC                                    | -0.239               | <b>0.811</b>  | <b>0.794</b>  | <b>0.878</b>  |
| DPPH                                   | -0.280               | <b>0.893</b>  | <b>0.742</b>  | <b>0.932</b>  |
| FRAP                                   | -0.203               | <b>0.692</b>  | <b>0.873</b>  | <b>0.794</b>  |
| ABTS                                   | -0.183               | <b>0.746</b>  | <b>0.838</b>  | <b>0.830</b>  |
| L*                                     | 0.405                | <b>-0.700</b> | -0.083        | <b>-0.607</b> |
| a*                                     | -0.227               | <b>0.549</b>  | 0.001         | <b>0.465</b>  |
| b*                                     | -0.417               | <b>0.777</b>  | 0.171         | <b>0.694</b>  |
| Quinic acid                            | -0.305               | <b>0.780</b>  | 0.369         | <b>0.749</b>  |
| Gallic acid                            | -0.094               | <b>0.629</b>  | <b>0.704</b>  | <b>0.704</b>  |
| Chlorogenic acid                       | -0.187               | <b>0.751</b>  | <b>0.843</b>  | <b>0.839</b>  |
| Total phenolic acids                   | -0.265               | <b>0.841</b>  | <b>0.589</b>  | <b>0.854</b>  |
| Gallocatechin                          | -0.259               | <b>0.865</b>  | <b>0.755</b>  | <b>0.912</b>  |
| Epigallocatechin                       | -0.170               | <b>0.711</b>  | <b>0.853</b>  | <b>0.805</b>  |
| Procyanidin B1                         | -0.224               | <b>0.774</b>  | <b>0.747</b>  | <b>0.835</b>  |
| Catechin                               | -0.279               | <b>0.884</b>  | <b>0.681</b>  | <b>0.910</b>  |
| Procyanidin B2                         | -0.155               | <b>0.497</b>  | <b>0.727</b>  | <b>0.594</b>  |
| Epicatechin                            | -0.173               | <b>0.638</b>  | <b>0.707</b>  | <b>0.712</b>  |
| Epigallocatechin gallate               | -0.269               | <b>0.813</b>  | <b>0.537</b>  | <b>0.817</b>  |
| Procyanidin B1 3-O-gallate             | -0.218               | <b>0.543</b>  | <b>0.666</b>  | <b>0.618</b>  |
| Gallocatechin gallate                  | -0.133               | <b>0.588</b>  | <b>0.849</b>  | <b>0.698</b>  |
| Quercetin 3-O-di-galactoside/glucoside | -0.183               | <b>0.684</b>  | <b>0.836</b>  | <b>0.777</b>  |
| Myricetin 3-O-galactoside 1            | -0.150               | <b>0.486</b>  | 0.228         | <b>0.469</b>  |
| Epicatechin gallate                    | -0.191               | <b>0.678</b>  | <b>0.699</b>  | <b>0.742</b>  |
| Rutin                                  | -0.214               | <b>0.733</b>  | <b>0.658</b>  | <b>0.782</b>  |
| Quercetin 3-O-galactoside              | -0.185               | <b>0.514</b>  | 0.330         | <b>0.521</b>  |

|                                  |              |               |               |               |
|----------------------------------|--------------|---------------|---------------|---------------|
| Kaempferol 3-O-rutinoside 2      | -0.137       | <b>0.507</b>  | 0.403         | <b>0.528</b>  |
| Kaempferol 3-O-glucoside         | -0.140       | 0.390         | 0.086         | 0.355         |
| Unknown quercetin conjugate      | -0.214       | <b>0.720</b>  | <b>0.631</b>  | <b>0.761</b>  |
| Unknown kaempferol conjugate     | -0.206       | <b>0.765</b>  | <b>0.606</b>  | <b>0.792</b>  |
| Total flavonoids                 | -0.262       | <b>0.866</b>  | <b>0.746</b>  | <b>0.910</b>  |
| Caffeine                         | -0.147       | <b>0.589</b>  | <b>0.898</b>  | <b>0.711</b>  |
| Ethoxyacetic acid                | 0.153        | 0.022         | 0.259         | 0.108         |
| Acetic acid                      | -0.303       | 0.325         | -0.041        | 0.274         |
| Pterin-6-carboxylic acid         | -0.273       | <b>0.780</b>  | <b>0.519</b>  | <b>0.783</b>  |
| Hexanoic acid                    | 0.100        | -0.236        | -0.218        | -0.237        |
| Octanoic acid                    | <b>0.575</b> | <b>-0.798</b> | -0.420        | <b>-0.757</b> |
| Nonanoic acid                    | <b>0.613</b> | <b>-0.727</b> | -0.234        | <b>-0.658</b> |
| Total acid                       | <b>0.536</b> | <b>-0.740</b> | -0.380        | <b>-0.698</b> |
| 2-Methyl-1-propanol              | -0.167       | 0.342         | 0.211         | 0.362         |
| 2-Pentanol                       | -0.096       | 0.235         | <b>0.542</b>  | 0.328         |
| 1-Butanol                        | -0.065       | 0.357         | 0.158         | 0.342         |
| 2-Hexanol                        | -0.069       | 0.348         | 0.113         | 0.333         |
| 3-Methyl-1-butanol               | -0.229       | 0.134         | -0.009        | 0.131         |
| 1-(2-Aminoethylamino)-2-propanol | -0.222       | <b>0.745</b>  | <b>0.953</b>  | <b>0.842</b>  |
| 2-Octen-4-ol                     | -0.200       | <b>0.750</b>  | <b>0.862</b>  | <b>0.841</b>  |
| 3-Methyl-1-pentanol              | -0.196       | 0.046         | -0.113        | 0.031         |
| (E)-3-Hexen-1-ol                 | -0.054       | 0.052         | 0.303         | 0.117         |
| 1-Hexanol                        | 0.024        | 0.114         | 0.380         | 0.196         |
| 2-Methyl-4-heptanol              | 0.209        | 0.069         | 0.158         | 0.104         |
| 2-Ethyl-1-hexanol                | -0.354       | <b>0.482</b>  | -0.021        | 0.399         |
| Linalool                         | -0.246       | <b>0.829</b>  | <b>0.619</b>  | <b>0.852</b>  |
| 1-Octanol                        | 0.098        | <b>-0.621</b> | <b>-0.458</b> | <b>-0.622</b> |
| 2,3-Butanediol                   | -0.323       | 0.268         | -0.087        | 0.215         |
| Phenylethyl alcohol              | -0.071       | -0.265        | -0.348        | -0.294        |
| Total alcohol                    | -0.196       | 0.143         | -0.004        | 0.139         |
| 3-Hydroxybutanal                 | -0.180       | 0.357         | <b>0.459</b>  | 0.350         |
| Octanal                          | -0.059       | -0.036        | 0.135         | 0.025         |
| Total aldehyde                   | -0.060       | -0.034        | 0.136         | 0.027         |

|                                         |              |               |              |               |
|-----------------------------------------|--------------|---------------|--------------|---------------|
| Benzaldehyde                            | -0.210       | 0.080         | -0.113       | -0.016        |
| Myristicin                              | -0.077       | -0.367        | -0.412       | -0.412        |
| Benzeneacetaldehyde                     | -0.329       | <b>0.618</b>  | 0.240        | <b>0.573</b>  |
| Naphthalene                             | -0.355       | <b>0.975</b>  | <b>0.690</b> | <b>0.982</b>  |
| 1,2-Dihydro-1,1,6-trimethyl-naphthalene | -0.355       | <b>0.975</b>  | <b>0.690</b> | <b>0.982</b>  |
| Benzyl alcohol                          | 0.290        | -0.005        | 0.249        | 0.061         |
| Total benzenoid                         | 0.236        | 0.045         | 0.242        | 0.093         |
| Ethyl butanoate                         | 0.222        | 0.132         | 0.373        | 0.221         |
| Ethyl 3-methylbutanoate                 | 0.134        | -0.141        | 0.077        | -0.070        |
| 3-Methylbutyl acetate                   | 0.324        | 0.074         | 0.342        | 0.159         |
| 3-Hydroxymandelic acid ethyl ester      | 0.263        | -0.068        | 0.014        | -0.032        |
| Ethyl hexanoate                         | 0.310        | -0.352        | 0.017        | -0.267        |
| Hexyl acetate                           | <b>0.482</b> | -0.089        | 0.220        | -0.007        |
| Ethyl (E)-3-hexenoate                   | 0.109        | 0.335         | 0.166        | 0.344         |
| Ethyl lactate                           | -0.269       | -0.141        | -0.247       | -0.168        |
| Propyl hexanoate                        | 0.123        | -0.209        | 0.030        | -0.143        |
| Ethyl octanoate                         | <b>0.449</b> | <b>-0.742</b> | -0.345       | <b>-0.687</b> |
| Ethyl 3-hydroxybutanoate                | -0.148       | <b>-0.610</b> | -0.396       | <b>-0.608</b> |
| Ethyl nonanoate                         | 0.326        | -0.301        | -0.085       | -0.256        |
| Isoamyl lactate                         | -0.273       | 0.383         | -0.032       | 0.319         |
| Methyl decanoate                        | 0.132        | -0.297        | 0.101        | -0.232        |
| Ethyl 2-furancarboxylate                | -0.302       | -0.393        | -0.317       | -0.410        |
| Ethyl decanoate                         | <b>0.637</b> | <b>-0.742</b> | -0.290       | <b>-0.678</b> |
| Diethyl succinate                       | -0.191       | -0.285        | -0.397       | -0.339        |
| Ethyl 9-decenoate                       | 0.407        | <b>-0.728</b> | -0.338       | <b>-0.680</b> |
| Ethyl benzeneacetate                    | -0.283       | <b>0.590</b>  | 0.046        | <b>0.502</b>  |
| 2-Phenethyl acetate                     | 0.283        | -0.131        | -0.271       | -0.167        |
| Ethyl dodecanoate                       | <b>0.619</b> | -0.195        | 0.063        | -0.152        |
| Total ester                             | 0.282        | -0.115        | -0.009       | -0.076        |
| 3-Hydroxy-2-butanone                    | <b>1</b>     | -0.408        | -0.187       | -0.381        |
| Limonene                                | -0.408       | <b>1</b>      | <b>0.633</b> | <b>0.984</b>  |
| Terpinolene                             | -0.187       | <b>0.633</b>  | <b>1</b>     | <b>0.751</b>  |
| Total terpene                           | -0.381       | <b>0.984</b>  | <b>0.751</b> | <b>1</b>      |

Values in **bold** indicate significant ( $p < 0.05$ ) correlation

**Table S7** Correlation matrix of quantified phenolic and volatile compounds, physicochemical properties and tested responses of tea-macerated model wines

(continued 1/7)

| Variables                              | TA            | pH            | TPC           | TFC           | DPPH          | FRAP          | ABTS          | L*            | a*            | b*            | Quinic acid   | Gallic acid   | Chlorogenic acid | Total phenolic acids | Gallocatechin |
|----------------------------------------|---------------|---------------|---------------|---------------|---------------|---------------|---------------|---------------|---------------|---------------|---------------|---------------|------------------|----------------------|---------------|
| TA                                     | <b>1</b>      | <b>-0.986</b> | <b>-0.567</b> | <b>-0.596</b> | <b>-0.595</b> | <b>-0.489</b> | <b>-0.517</b> | <b>0.682</b>  | <b>-0.492</b> | <b>-0.847</b> | <b>-0.476</b> | <b>-0.490</b> | <b>-0.499</b>    | <b>-0.719</b>        | <b>-0.712</b> |
| pH                                     | <b>-0.986</b> | <b>1</b>      | <b>0.558</b>  | <b>0.577</b>  | <b>0.566</b>  | <b>0.466</b>  | <b>0.499</b>  | <b>-0.714</b> | <b>0.550</b>  | <b>0.863</b>  | <b>0.500</b>  | <b>0.483</b>  | <b>0.468</b>     | <b>0.724</b>         | <b>0.703</b>  |
| TPC                                    | <b>-0.567</b> | <b>0.558</b>  | <b>1</b>      | <b>0.763</b>  | <b>0.893</b>  | <b>0.929</b>  | <b>0.933</b>  | -0.269        | 0.170         | 0.410         | 0.350         | <b>0.815</b>  | <b>0.854</b>     | <b>0.940</b>         | <b>0.947</b>  |
| TFC                                    | <b>-0.596</b> | <b>0.577</b>  | <b>0.763</b>  | <b>1</b>      | <b>0.769</b>  | <b>0.758</b>  | <b>0.785</b>  | -0.236        | 0.136         | 0.436         | 0.288         | <b>0.712</b>  | <b>0.823</b>     | <b>0.822</b>         | <b>0.801</b>  |
| DPPH                                   | <b>-0.595</b> | <b>0.566</b>  | <b>0.893</b>  | <b>0.769</b>  | <b>1</b>      | <b>0.967</b>  | <b>0.981</b>  | -0.162        | 0.010         | 0.343         | 0.392         | <b>0.701</b>  | <b>0.968</b>     | <b>0.894</b>         | <b>0.867</b>  |
| FRAP                                   | <b>-0.489</b> | <b>0.466</b>  | <b>0.929</b>  | <b>0.758</b>  | <b>0.967</b>  | <b>1</b>      | <b>0.979</b>  | -0.100        | -0.021        | 0.257         | 0.418         | <b>0.671</b>  | <b>0.948</b>     | <b>0.884</b>         | <b>0.884</b>  |
| ABTS                                   | <b>-0.517</b> | <b>0.499</b>  | <b>0.933</b>  | <b>0.785</b>  | <b>0.981</b>  | <b>0.979</b>  | <b>1</b>      | -0.123        | 0.003         | 0.288         | 0.337         | <b>0.758</b>  | <b>0.966</b>     | <b>0.905</b>         | <b>0.880</b>  |
| L*                                     | <b>0.682</b>  | <b>-0.714</b> | -0.269        | -0.236        | -0.162        | -0.100        | -0.123        | <b>1</b>      | <b>-0.959</b> | <b>-0.942</b> | <b>-0.582</b> | -0.205        | -0.014           | <b>-0.500</b>        | <b>-0.492</b> |
| a*                                     | <b>-0.492</b> | <b>0.550</b>  | 0.170         | 0.136         | 0.010         | -0.021        | 0.003         | <b>-0.959</b> | <b>1</b>      | <b>0.849</b>  | <b>0.530</b>  | 0.135         | -0.127           | 0.397                | 0.369         |
| b*                                     | <b>-0.847</b> | <b>0.863</b>  | 0.410         | 0.436         | 0.343         | 0.257         | 0.288         | <b>-0.942</b> | <b>0.849</b>  | <b>1</b>      | <b>0.593</b>  | 0.333         | 0.201            | <b>0.628</b>         | <b>0.622</b>  |
| Quinic acid                            | <b>-0.476</b> | <b>0.500</b>  | 0.350         | 0.288         | 0.392         | 0.418         | 0.337         | <b>-0.582</b> | <b>0.530</b>  | <b>0.593</b>  | <b>1</b>      | -0.147        | 0.265            | <b>0.511</b>         | <b>0.519</b>  |
| Gallic acid                            | <b>-0.490</b> | <b>0.483</b>  | <b>0.815</b>  | <b>0.712</b>  | <b>0.701</b>  | <b>0.671</b>  | <b>0.758</b>  | -0.205        | 0.135         | 0.333         | -0.147        | <b>1</b>      | <b>0.721</b>     | <b>0.771</b>         | <b>0.736</b>  |
| Chlorogenic acid                       | <b>-0.499</b> | <b>0.468</b>  | <b>0.854</b>  | <b>0.823</b>  | <b>0.968</b>  | <b>0.948</b>  | <b>0.966</b>  | -0.014        | -0.127        | 0.201         | 0.265         | <b>0.721</b>  | <b>1</b>         | <b>0.839</b>         | <b>0.808</b>  |
| Total phenolic acids                   | <b>-0.719</b> | <b>0.724</b>  | <b>0.940</b>  | <b>0.822</b>  | <b>0.894</b>  | <b>0.884</b>  | <b>0.905</b>  | <b>-0.500</b> | 0.397         | <b>0.628</b>  | <b>0.511</b>  | <b>0.771</b>  | <b>0.839</b>     | <b>1</b>             | <b>0.973</b>  |
| Gallocatechin                          | <b>-0.712</b> | <b>0.703</b>  | <b>0.947</b>  | <b>0.801</b>  | <b>0.867</b>  | <b>0.884</b>  | <b>0.880</b>  | <b>-0.492</b> | 0.369         | <b>0.622</b>  | <b>0.519</b>  | <b>0.736</b>  | <b>0.808</b>     | <b>0.973</b>         | <b>1</b>      |
| Epigallocatechin                       | <b>-0.500</b> | <b>0.477</b>  | <b>0.938</b>  | <b>0.820</b>  | <b>0.961</b>  | <b>0.981</b>  | <b>0.977</b>  | -0.085        | -0.037        | 0.262         | 0.384         | <b>0.705</b>  | <b>0.959</b>     | <b>0.891</b>         | <b>0.878</b>  |
| Procyanidin B1                         | <b>-0.719</b> | <b>0.688</b>  | <b>0.912</b>  | <b>0.816</b>  | <b>0.954</b>  | <b>0.911</b>  | <b>0.933</b>  | -0.279        | 0.108         | <b>0.468</b>  | 0.337         | <b>0.789</b>  | <b>0.932</b>     | <b>0.924</b>         | <b>0.911</b>  |
| Catechin                               | <b>-0.727</b> | <b>0.696</b>  | <b>0.908</b>  | <b>0.773</b>  | <b>0.910</b>  | <b>0.883</b>  | <b>0.884</b>  | -0.443        | 0.293         | <b>0.592</b>  | <b>0.453</b>  | <b>0.739</b>  | <b>0.843</b>     | <b>0.942</b>         | <b>0.957</b>  |
| Procyanidin B2                         | <b>-0.472</b> | <b>0.476</b>  | <b>0.824</b>  | <b>0.784</b>  | <b>0.806</b>  | <b>0.868</b>  | <b>0.853</b>  | -0.117        | 0.020         | 0.256         | <b>0.484</b>  | <b>0.543</b>  | <b>0.842</b>     | <b>0.811</b>         | <b>0.807</b>  |
| Epicatechin                            | <b>-0.516</b> | <b>0.513</b>  | <b>0.789</b>  | <b>0.831</b>  | <b>0.808</b>  | <b>0.842</b>  | <b>0.824</b>  | -0.271        | 0.180         | <b>0.445</b>  | <b>0.629</b>  | <b>0.467</b>  | <b>0.781</b>     | <b>0.830</b>         | <b>0.847</b>  |
| Epigallocatechin gallate               | <b>-0.524</b> | <b>0.513</b>  | <b>0.674</b>  | <b>0.521</b>  | <b>0.608</b>  | <b>0.694</b>  | <b>0.608</b>  | <b>-0.489</b> | 0.398         | <b>0.530</b>  | <b>0.758</b>  | 0.267         | <b>0.532</b>     | <b>0.720</b>         | <b>0.813</b>  |
| Procyanidin B1 3-O-gallate             | <b>-0.632</b> | <b>0.650</b>  | <b>0.831</b>  | <b>0.767</b>  | <b>0.811</b>  | <b>0.828</b>  | <b>0.842</b>  | <b>-0.507</b> | 0.427         | <b>0.609</b>  | <b>0.585</b>  | <b>0.626</b>  | <b>0.758</b>     | <b>0.922</b>         | <b>0.923</b>  |
| Gallocatechin gallate                  | <b>-0.492</b> | <b>0.458</b>  | <b>0.887</b>  | <b>0.827</b>  | <b>0.965</b>  | <b>0.970</b>  | <b>0.965</b>  | -0.031        | -0.104        | 0.224         | 0.380         | <b>0.655</b>  | <b>0.976</b>     | <b>0.853</b>         | <b>0.838</b>  |
| Quercetin 3-O-di-galactoside/glucoside | <b>-0.471</b> | <b>0.490</b>  | <b>0.832</b>  | <b>0.763</b>  | <b>0.720</b>  | <b>0.796</b>  | <b>0.809</b>  | -0.236        | 0.176         | 0.355         | 0.344         | <b>0.678</b>  | <b>0.739</b>     | <b>0.818</b>         | <b>0.825</b>  |
| Myricetin 3-O-galactoside 1            | -0.247        | 0.192         | <b>0.487</b>  | 0.314         | <b>0.546</b>  | <b>0.468</b>  | <b>0.497</b>  | -0.081        | 0.002         | 0.171         | -0.105        | <b>0.568</b>  | <b>0.476</b>     | 0.434                | 0.428         |
| Epicatechin gallate                    | <b>-0.706</b> | <b>0.699</b>  | <b>0.850</b>  | <b>0.789</b>  | <b>0.887</b>  | <b>0.869</b>  | <b>0.884</b>  | -0.396        | 0.252         | <b>0.540</b>  | 0.422         | <b>0.719</b>  | <b>0.858</b>     | <b>0.911</b>         | <b>0.913</b>  |
| Rutin                                  | <b>-0.562</b> | <b>0.555</b>  | <b>0.631</b>  | <b>0.554</b>  | <b>0.726</b>  | <b>0.743</b>  | <b>0.678</b>  | -0.428        | 0.298         | <b>0.518</b>  | <b>0.850</b>  | 0.191         | <b>0.636</b>     | <b>0.731</b>         | <b>0.749</b>  |
| Quercetin 3-O-galactoside              | <b>-0.503</b> | <b>0.485</b>  | <b>0.503</b>  | 0.414         | <b>0.531</b>  | <b>0.497</b>  | <b>0.500</b>  | <b>-0.476</b> | 0.358         | <b>0.496</b>  | 0.365         | 0.422         | <b>0.461</b>     | <b>0.598</b>         | <b>0.576</b>  |
| Kaempferol 3-O-rutinoside 2            | <b>-0.647</b> | <b>0.646</b>  | <b>0.774</b>  | <b>0.722</b>  | <b>0.806</b>  | <b>0.783</b>  | <b>0.809</b>  | -0.400        | 0.279         | <b>0.528</b>  | 0.370         | <b>0.679</b>  | <b>0.774</b>     | <b>0.838</b>         | <b>0.852</b>  |

|                                  |               |              |              |              |              |              |              |               |              |              |              |              |              |              |              |
|----------------------------------|---------------|--------------|--------------|--------------|--------------|--------------|--------------|---------------|--------------|--------------|--------------|--------------|--------------|--------------|--------------|
| Kaempferol 3-O-glucoside         | <b>-0.530</b> | <b>0.528</b> | <b>0.512</b> | 0.429        | <b>0.600</b> | <b>0.625</b> | <b>0.555</b> | <b>-0.487</b> | 0.365        | <b>0.538</b> | <b>0.894</b> | 0.051        | <b>0.498</b> | <b>0.631</b> | <b>0.673</b> |
| Unknown quercetin conjugate      | <b>-0.596</b> | <b>0.558</b> | <b>0.816</b> | <b>0.763</b> | <b>0.832</b> | <b>0.769</b> | <b>0.828</b> | -0.176        | 0.034        | 0.343        | 0.014        | <b>0.894</b> | <b>0.859</b> | <b>0.804</b> | <b>0.775</b> |
| Unknown kaempferol conjugate     | <b>-0.641</b> | <b>0.601</b> | <b>0.826</b> | <b>0.757</b> | <b>0.920</b> | <b>0.903</b> | <b>0.875</b> | -0.225        | 0.052        | 0.399        | <b>0.545</b> | <b>0.538</b> | <b>0.902</b> | <b>0.851</b> | <b>0.853</b> |
| Total flavonoids                 | <b>-0.694</b> | <b>0.668</b> | <b>0.942</b> | <b>0.813</b> | <b>0.941</b> | <b>0.931</b> | <b>0.930</b> | -0.381        | 0.237        | <b>0.538</b> | <b>0.469</b> | <b>0.743</b> | <b>0.890</b> | <b>0.961</b> | <b>0.972</b> |
| Caffeine                         | <b>-0.453</b> | <b>0.451</b> | <b>0.866</b> | <b>0.745</b> | <b>0.869</b> | <b>0.919</b> | <b>0.910</b> | -0.055        | -0.053       | 0.200        | 0.431        | <b>0.592</b> | <b>0.893</b> | <b>0.824</b> | <b>0.813</b> |
| Ethoxyacetic acid                | -0.409        | 0.394        | -0.274       | -0.156       | -0.159       | -0.282       | -0.246       | -0.078        | -0.055       | 0.185        | -0.125       | -0.158       | -0.213       | -0.222       | -0.215       |
| Acetic acid                      | <b>-0.813</b> | <b>0.735</b> | 0.392        | 0.374        | 0.379        | 0.269        | 0.289        | <b>-0.513</b> | 0.316        | <b>0.666</b> | 0.199        | 0.386        | 0.272        | <b>0.447</b> | <b>0.480</b> |
| Pterin-6-carboxylic acid         | <b>-0.655</b> | <b>0.650</b> | 0.362        | <b>0.476</b> | 0.247        | 0.193        | 0.243        | -0.343        | 0.242        | <b>0.451</b> | 0.045        | <b>0.464</b> | 0.281        | 0.417        | 0.412        |
| Hexanoic acid                    | -0.343        | 0.415        | -0.126       | -0.089       | -0.157       | -0.194       | -0.212       | <b>-0.467</b> | <b>0.493</b> | 0.404        | 0.197        | -0.040       | -0.188       | 0.059        | -0.011       |
| Octanoic acid                    | -0.068        | 0.062        | -0.016       | 0.126        | -0.024       | 0.024        | -0.051       | 0.193         | -0.222       | -0.184       | -0.176       | 0.067        | 0.101        | -0.039       | -0.068       |
| Nonanoic acid                    | <b>-0.956</b> | <b>0.901</b> | <b>0.470</b> | <b>0.530</b> | <b>0.524</b> | 0.411        | 0.424        | <b>-0.571</b> | 0.354        | <b>0.758</b> | 0.394        | 0.396        | 0.439        | <b>0.592</b> | <b>0.604</b> |
| Total acid                       | -0.282        | 0.332        | -0.108       | -0.018       | -0.132       | -0.140       | -0.186       | -0.255        | 0.260        | 0.214        | 0.062        | -0.007       | -0.102       | 0.018        | -0.047       |
| 2-Methyl-1-propanol              | <b>-0.756</b> | <b>0.748</b> | 0.438        | 0.421        | <b>0.521</b> | 0.402        | <b>0.459</b> | -0.410        | 0.262        | <b>0.545</b> | 0.221        | <b>0.477</b> | <b>0.484</b> | <b>0.558</b> | <b>0.507</b> |
| 2-Pentanol                       | <b>-0.956</b> | <b>0.901</b> | <b>0.470</b> | <b>0.530</b> | <b>0.524</b> | 0.411        | 0.424        | <b>-0.571</b> | 0.354        | <b>0.758</b> | 0.394        | 0.396        | 0.439        | <b>0.592</b> | <b>0.604</b> |
| 1-Butanol                        | <b>-0.956</b> | <b>0.901</b> | <b>0.470</b> | <b>0.530</b> | <b>0.524</b> | 0.411        | 0.424        | <b>-0.571</b> | 0.354        | <b>0.758</b> | 0.394        | 0.396        | 0.439        | <b>0.592</b> | <b>0.604</b> |
| 2-Hexanol                        | -0.244        | 0.252        | 0.153        | 0.186        | 0.369        | 0.238        | 0.282        | 0.052         | -0.136       | 0.113        | -0.094       | 0.274        | 0.330        | 0.198        | 0.165        |
| 3-Methyl-1-butanol               | <b>-0.767</b> | <b>0.723</b> | 0.350        | <b>0.475</b> | 0.387        | 0.327        | 0.295        | -0.328        | 0.147        | <b>0.477</b> | 0.203        | 0.340        | 0.391        | 0.430        | 0.423        |
| 1-(2-Aminoethylamino)-2-propanol | <b>-0.589</b> | <b>0.510</b> | 0.161        | 0.246        | 0.178        | 0.109        | 0.127        | -0.427        | 0.286        | <b>0.528</b> | 0.189        | 0.146        | 0.109        | 0.236        | 0.301        |
| 2-Octen-4-ol                     | <b>-0.512</b> | <b>0.523</b> | <b>0.882</b> | <b>0.706</b> | <b>0.784</b> | <b>0.827</b> | <b>0.838</b> | -0.072        | -0.021       | 0.220        | 0.171        | <b>0.771</b> | <b>0.796</b> | <b>0.794</b> | <b>0.772</b> |
| 3-Methyl-1-pentanol              | <b>-0.956</b> | <b>0.901</b> | <b>0.470</b> | <b>0.530</b> | <b>0.524</b> | 0.411        | 0.424        | <b>-0.571</b> | 0.354        | <b>0.758</b> | 0.394        | 0.396        | 0.439        | <b>0.592</b> | <b>0.604</b> |
| (E)-3-Hexen-1-ol                 | -0.414        | 0.408        | 0.062        | 0.033        | 0.066        | -0.006       | -0.002       | <b>-0.546</b> | <b>0.468</b> | <b>0.491</b> | 0.265        | 0.071        | -0.031       | 0.205        | 0.180        |
| 1-Hexanol                        | <b>-0.485</b> | <b>0.528</b> | 0.085        | 0.130        | 0.100        | 0.033        | 0.052        | -0.219        | 0.141        | 0.397        | 0.156        | 0.086        | 0.059        | 0.165        | 0.180        |
| 2-Methyl-4-heptanol              | -0.204        | 0.272        | -0.105       | -0.082       | -0.107       | -0.153       | -0.132       | -0.100        | 0.081        | 0.206        | 0.042        | -0.071       | -0.129       | -0.046       | -0.030       |
| 2-Ethyl-1-hexanol                | -0.388        | 0.410        | 0.368        | 0.132        | 0.308        | 0.299        | 0.276        | -0.365        | 0.287        | 0.373        | 0.416        | 0.156        | 0.212        | 0.392        | 0.385        |
| Linalool                         | <b>-0.490</b> | <b>0.526</b> | <b>0.877</b> | <b>0.617</b> | <b>0.752</b> | <b>0.807</b> | <b>0.816</b> | -0.380        | 0.352        | <b>0.467</b> | <b>0.451</b> | <b>0.675</b> | <b>0.674</b> | <b>0.869</b> | <b>0.844</b> |
| 1-Octanol                        | <b>-0.486</b> | <b>0.506</b> | <b>0.870</b> | <b>0.668</b> | <b>0.756</b> | <b>0.803</b> | <b>0.809</b> | -0.261        | 0.213        | 0.399        | 0.422        | <b>0.640</b> | <b>0.688</b> | <b>0.828</b> | <b>0.794</b> |
| 2,3-Butanediol                   | <b>-0.875</b> | <b>0.839</b> | 0.428        | <b>0.509</b> | 0.426        | 0.355        | 0.364        | <b>-0.540</b> | 0.359        | <b>0.678</b> | 0.407        | 0.331        | 0.370        | <b>0.541</b> | <b>0.560</b> |
| Phenylethyl alcohol              | -0.378        | 0.440        | -0.170       | -0.145       | -0.202       | -0.294       | -0.265       | <b>-0.805</b> | <b>0.825</b> | <b>0.655</b> | 0.348        | -0.095       | -0.305       | 0.091        | 0.032        |
| Total alcohol                    | <b>-0.534</b> | <b>0.608</b> | 0.084        | 0.062        | 0.091        | -0.020       | 0.023        | <b>-0.742</b> | <b>0.720</b> | <b>0.705</b> | 0.357        | 0.146        | -0.023       | 0.317        | 0.256        |
| 3-Hydroxybutanal                 | <b>-0.515</b> | <b>0.459</b> | 0.042        | 0.089        | -0.002       | -0.026       | -0.084       | <b>-0.620</b> | <b>0.512</b> | <b>0.645</b> | <b>0.563</b> | -0.186       | -0.102       | 0.176        | 0.257        |
| Octanal                          | -0.322        | 0.288        | -0.232       | -0.006       | -0.220       | -0.312       | -0.267       | -0.019        | -0.094       | 0.116        | -0.272       | -0.048       | -0.200       | -0.223       | -0.181       |
| Total aldehyde                   | -0.322        | 0.289        | -0.232       | -0.006       | -0.220       | -0.312       | -0.267       | -0.019        | -0.094       | 0.116        | -0.272       | -0.048       | -0.200       | -0.223       | -0.181       |
| Benzaldehyde                     | -0.430        | <b>0.487</b> | -0.174       | -0.133       | -0.195       | -0.303       | -0.265       | <b>-0.853</b> | <b>0.862</b> | <b>0.736</b> | 0.391        | -0.114       | -0.316       | 0.100        | 0.051        |
| Myristicin                       | -0.415        | 0.354        | 0.124        | 0.259        | 0.119        | 0.099        | 0.081        | -0.153        | 0.035        | 0.284        | 0.118        | 0.061        | 0.093        | 0.129        | 0.147        |
| Benzeneacetaldehyde              | -0.373        | 0.399        | -0.128       | -0.162       | -0.118       | -0.221       | -0.195       | <b>-0.461</b> | 0.388        | <b>0.468</b> | 0.141        | -0.060       | -0.222       | 0.007        | 0.004        |
| Naphthalene                      | <b>-0.956</b> | <b>0.901</b> | <b>0.470</b> | <b>0.530</b> | <b>0.524</b> | 0.411        | 0.424        | <b>-0.571</b> | 0.354        | <b>0.758</b> | 0.394        | 0.396        | 0.439        | <b>0.592</b> | <b>0.604</b> |



|                                         |               |              |              |              |              |              |              |               |              |              |              |              |              |              |              |
|-----------------------------------------|---------------|--------------|--------------|--------------|--------------|--------------|--------------|---------------|--------------|--------------|--------------|--------------|--------------|--------------|--------------|
| 1,2-Dihydro-1,1,6-trimethyl-naphthalene | <b>-0.956</b> | <b>0.901</b> | <b>0.470</b> | <b>0.530</b> | <b>0.524</b> | 0.411        | 0.424        | <b>-0.571</b> | 0.354        | <b>0.758</b> | 0.394        | 0.396        | 0.439        | <b>0.592</b> | <b>0.604</b> |
| Benzyl alcohol                          | -0.362        | 0.424        | -0.221       | -0.171       | -0.238       | -0.340       | -0.299       | <b>-0.601</b> | <b>0.585</b> | <b>0.567</b> | 0.230        | -0.144       | -0.332       | -0.020       | -0.032       |
| Total benzenoid                         | -0.370        | 0.432        | -0.220       | -0.174       | -0.236       | -0.341       | -0.299       | <b>-0.628</b> | <b>0.613</b> | <b>0.587</b> | 0.246        | -0.144       | -0.335       | -0.011       | -0.026       |
| Ethyl butanoate                         | -0.340        | 0.346        | 0.023        | 0.176        | 0.248        | 0.132        | 0.168        | 0.211         | -0.339       | -0.051       | -0.259       | 0.217        | 0.296        | 0.053        | 0.006        |
| Ethyl 3-methylbutanoate                 | <b>-0.956</b> | <b>0.901</b> | <b>0.470</b> | <b>0.530</b> | <b>0.524</b> | 0.411        | 0.424        | <b>-0.571</b> | 0.354        | <b>0.758</b> | 0.394        | 0.396        | 0.439        | <b>0.592</b> | <b>0.604</b> |
| 3-Methylbutyl acetate                   | <b>-0.956</b> | <b>0.901</b> | <b>0.470</b> | <b>0.530</b> | <b>0.524</b> | 0.411        | 0.424        | <b>-0.571</b> | 0.354        | <b>0.758</b> | 0.394        | 0.396        | 0.439        | <b>0.592</b> | <b>0.604</b> |
| 3-Hydroxymandelic acid ethyl ester      | -0.022        | -0.020       | -0.363       | -0.434       | -0.269       | -0.371       | -0.361       | 0.009         | -0.089       | -0.011       | -0.224       | -0.250       | -0.356       | -0.370       | -0.373       |
| Ethyl hexanoate                         | -0.314        | 0.352        | <b>0.688</b> | <b>0.464</b> | 0.418        | <b>0.461</b> | <b>0.528</b> | -0.219        | 0.237        | 0.306        | 0.001        | <b>0.714</b> | 0.381        | <b>0.595</b> | <b>0.557</b> |
| Hexyl acetate                           | <b>-0.563</b> | <b>0.571</b> | <b>0.461</b> | <b>0.504</b> | 0.317        | 0.375        | 0.319        | -0.285        | 0.230        | 0.418        | 0.403        | 0.255        | 0.311        | <b>0.473</b> | <b>0.517</b> |
| Ethyl (E)-3-hexenoate                   | -0.218        | 0.199        | 0.139        | 0.067        | 0.313        | 0.300        | 0.226        | -0.244        | 0.168        | 0.278        | <b>0.527</b> | -0.133       | 0.193        | 0.235        | 0.233        |
| Ethyl lactate                           | <b>-0.635</b> | <b>0.615</b> | 0.170        | 0.191        | 0.108        | 0.028        | 0.034        | <b>-0.641</b> | <b>0.542</b> | <b>0.655</b> | 0.158        | 0.250        | -0.003       | 0.283        | 0.309        |
| Propyl hexanoate                        | <b>-0.956</b> | <b>0.901</b> | <b>0.470</b> | <b>0.530</b> | <b>0.524</b> | 0.411        | 0.424        | <b>-0.571</b> | 0.354        | <b>0.758</b> | 0.394        | 0.396        | 0.439        | <b>0.592</b> | <b>0.604</b> |
| Ethyl octanoate                         | <b>-0.956</b> | <b>0.901</b> | <b>0.470</b> | <b>0.530</b> | <b>0.524</b> | 0.411        | 0.424        | <b>-0.571</b> | 0.354        | <b>0.758</b> | 0.394        | 0.396        | 0.439        | <b>0.592</b> | <b>0.604</b> |
| Ethyl 3-hydroxybutanoate                | <b>-0.635</b> | <b>0.623</b> | 0.103        | 0.060        | 0.052        | 0.020        | -0.021       | <b>-0.527</b> | 0.422        | <b>0.514</b> | 0.195        | 0.121        | -0.017       | 0.204        | 0.241        |
| Ethyl nonanoate                         | <b>-0.873</b> | <b>0.844</b> | 0.335        | 0.425        | 0.333        | 0.204        | 0.246        | <b>-0.576</b> | 0.399        | <b>0.728</b> | 0.189        | 0.411        | 0.257        | <b>0.458</b> | <b>0.459</b> |
| Isoamyl lactate                         | <b>-0.878</b> | <b>0.842</b> | 0.341        | 0.420        | 0.364        | 0.260        | 0.286        | <b>-0.660</b> | <b>0.462</b> | <b>0.758</b> | 0.347        | 0.322        | 0.286        | <b>0.487</b> | <b>0.513</b> |
| Methyl decanoate                        | <b>-0.956</b> | <b>0.901</b> | <b>0.470</b> | <b>0.530</b> | <b>0.524</b> | 0.411        | 0.424        | <b>-0.571</b> | 0.354        | <b>0.758</b> | 0.394        | 0.396        | 0.439        | <b>0.592</b> | <b>0.604</b> |
| Ethyl 2-furancarboxylate                | <b>-0.923</b> | <b>0.876</b> | <b>0.506</b> | <b>0.561</b> | <b>0.580</b> | <b>0.511</b> | <b>0.489</b> | <b>-0.548</b> | 0.345        | <b>0.732</b> | <b>0.574</b> | 0.307        | <b>0.492</b> | <b>0.637</b> | <b>0.653</b> |
| Ethyl decanoate                         | <b>-0.956</b> | <b>0.901</b> | <b>0.470</b> | <b>0.530</b> | <b>0.524</b> | 0.411        | 0.424        | <b>-0.571</b> | 0.354        | <b>0.758</b> | 0.394        | 0.396        | 0.439        | <b>0.592</b> | <b>0.604</b> |
| Diethyl succinate                       | <b>-0.956</b> | <b>0.901</b> | <b>0.470</b> | <b>0.530</b> | <b>0.524</b> | 0.411        | 0.424        | <b>-0.571</b> | 0.354        | <b>0.758</b> | 0.394        | 0.396        | 0.439        | <b>0.592</b> | <b>0.604</b> |
| Ethyl 9-decenoate                       | <b>-0.956</b> | <b>0.901</b> | <b>0.470</b> | <b>0.530</b> | <b>0.524</b> | 0.411        | 0.424        | <b>-0.571</b> | 0.354        | <b>0.758</b> | 0.394        | 0.396        | 0.439        | <b>0.592</b> | <b>0.604</b> |
| Ethyl benzeneacetate                    | <b>-0.956</b> | <b>0.901</b> | <b>0.470</b> | <b>0.530</b> | <b>0.524</b> | 0.411        | 0.424        | <b>-0.571</b> | 0.354        | <b>0.758</b> | 0.394        | 0.396        | 0.439        | <b>0.592</b> | <b>0.604</b> |
| 2-Phenethyl acetate                     | <b>-0.956</b> | <b>0.901</b> | <b>0.470</b> | <b>0.530</b> | <b>0.524</b> | 0.411        | 0.424        | <b>-0.571</b> | 0.354        | <b>0.758</b> | 0.394        | 0.396        | 0.439        | <b>0.592</b> | <b>0.604</b> |
| Ethyl dodecanoate                       | <b>-0.956</b> | <b>0.901</b> | <b>0.470</b> | <b>0.530</b> | <b>0.524</b> | 0.411        | 0.424        | <b>-0.571</b> | 0.354        | <b>0.758</b> | 0.394        | 0.396        | 0.439        | <b>0.592</b> | <b>0.604</b> |
| Total ester                             | -0.031        | -0.011       | -0.355       | -0.427       | -0.254       | -0.356       | -0.349       | 0.000         | -0.083       | 0.000        | -0.203       | -0.251       | -0.344       | -0.357       | -0.361       |
| 3-Hydroxy-2-butanone                    | <b>-0.956</b> | <b>0.901</b> | <b>0.470</b> | <b>0.530</b> | <b>0.524</b> | 0.411        | 0.424        | <b>-0.571</b> | 0.354        | <b>0.758</b> | 0.394        | 0.396        | 0.439        | <b>0.592</b> | <b>0.604</b> |
| Limonene                                | <b>-0.931</b> | <b>0.893</b> | <b>0.714</b> | <b>0.703</b> | <b>0.821</b> | <b>0.713</b> | <b>0.740</b> | <b>-0.519</b> | 0.307        | <b>0.711</b> | <b>0.469</b> | <b>0.594</b> | <b>0.740</b> | <b>0.828</b> | <b>0.808</b> |
| Terpinolene                             | <b>-0.496</b> | 0.422        | -0.042       | 0.027        | -0.084       | -0.155       | -0.137       | <b>-0.565</b> | <b>0.458</b> | <b>0.552</b> | 0.104        | 0.039        | -0.168       | 0.068        | 0.121        |
| Total terpene                           | <b>-0.922</b> | <b>0.886</b> | <b>0.722</b> | <b>0.716</b> | <b>0.834</b> | <b>0.730</b> | <b>0.756</b> | <b>-0.497</b> | 0.286        | <b>0.691</b> | <b>0.468</b> | <b>0.600</b> | <b>0.761</b> | <b>0.834</b> | <b>0.811</b> |

Values in **bold** indicate significant ( $p < 0.05$ ) correlation

**Table S7** Correlation matrix of quantified phenolic and volatile compounds, physicochemical properties and tested responses of tea-macerated model wines

(continued 2/7)

| Variables                  | Epigallocatechin | Procyanidin B1 | Catechin | Procyanidin B2 | Epicatechin | Epigallocatechin gallate | Procyanidin B1 3-O-gallate | Gallocatechin gallate | Quercetin 3-O-di-galactoside/gluco side | Myricetin 3-O-galactoside 1 | Epicatechin gallate | Rutin  | Quercetin 3-O-galactoside | Kaempferol 3-O-rutinoside 2 | Kaempferol 3-O-glucoside |
|----------------------------|------------------|----------------|----------|----------------|-------------|--------------------------|----------------------------|-----------------------|-----------------------------------------|-----------------------------|---------------------|--------|---------------------------|-----------------------------|--------------------------|
| TA                         | -0.500           | -0.719         | -0.727   | -0.472         | -0.516      | -0.524                   | -0.632                     | -0.492                | -0.471                                  | -0.247                      | -0.706              | -0.562 | -0.503                    | -0.647                      | -0.530                   |
| pH                         | 0.477            | 0.688          | 0.696    | 0.476          | 0.513       | 0.513                    | 0.650                      | 0.458                 | 0.490                                   | 0.192                       | 0.699               | 0.555  | 0.485                     | 0.646                       | 0.528                    |
| TPC                        | 0.938            | 0.912          | 0.908    | 0.824          | 0.789       | 0.674                    | 0.831                      | 0.887                 | 0.832                                   | 0.487                       | 0.850               | 0.631  | 0.503                     | 0.774                       | 0.512                    |
| TFC                        | 0.820            | 0.816          | 0.773    | 0.784          | 0.831       | 0.521                    | 0.767                      | 0.827                 | 0.763                                   | 0.314                       | 0.789               | 0.554  | 0.414                     | 0.722                       | 0.429                    |
| DPPH                       | 0.961            | 0.954          | 0.910    | 0.806          | 0.808       | 0.608                    | 0.811                      | 0.965                 | 0.720                                   | 0.546                       | 0.887               | 0.726  | 0.531                     | 0.806                       | 0.600                    |
| FRAP                       | 0.981            | 0.911          | 0.883    | 0.868          | 0.842       | 0.694                    | 0.828                      | 0.970                 | 0.796                                   | 0.468                       | 0.869               | 0.743  | 0.497                     | 0.783                       | 0.625                    |
| ABTS                       | 0.977            | 0.933          | 0.884    | 0.853          | 0.824       | 0.608                    | 0.842                      | 0.965                 | 0.809                                   | 0.497                       | 0.884               | 0.678  | 0.500                     | 0.809                       | 0.555                    |
| L*                         | -0.085           | -0.279         | -0.443   | -0.117         | -0.271      | -0.489                   | -0.507                     | -0.031                | -0.236                                  | -0.081                      | -0.396              | -0.428 | -0.476                    | -0.400                      | -0.487                   |
| a*                         | -0.037           | 0.108          | 0.293    | 0.020          | 0.180       | 0.398                    | 0.427                      | -0.104                | 0.176                                   | 0.002                       | 0.252               | 0.298  | 0.358                     | 0.279                       | 0.365                    |
| b*                         | 0.262            | 0.468          | 0.592    | 0.256          | 0.445       | 0.530                    | 0.609                      | 0.224                 | 0.355                                   | 0.171                       | 0.540               | 0.518  | 0.496                     | 0.528                       | 0.538                    |
| Quinic acid                | 0.384            | 0.337          | 0.453    | 0.484          | 0.629       | 0.758                    | 0.585                      | 0.380                 | 0.344                                   | -0.105                      | 0.422               | 0.850  | 0.365                     | 0.370                       | 0.894                    |
| Gallic acid                | 0.705            | 0.789          | 0.739    | 0.543          | 0.467       | 0.267                    | 0.626                      | 0.655                 | 0.678                                   | 0.568                       | 0.719               | 0.191  | 0.422                     | 0.679                       | 0.051                    |
| Chlorogenic acid           | 0.959            | 0.932          | 0.843    | 0.842          | 0.781       | 0.532                    | 0.758                      | 0.976                 | 0.739                                   | 0.476                       | 0.858               | 0.636  | 0.461                     | 0.774                       | 0.498                    |
| Total phenolic acids       | 0.891            | 0.924          | 0.942    | 0.811          | 0.830       | 0.720                    | 0.922                      | 0.853                 | 0.818                                   | 0.434                       | 0.911               | 0.731  | 0.598                     | 0.838                       | 0.631                    |
| Gallocatechin              | 0.878            | 0.911          | 0.957    | 0.807          | 0.847       | 0.813                    | 0.923                      | 0.838                 | 0.825                                   | 0.428                       | 0.913               | 0.749  | 0.576                     | 0.852                       | 0.673                    |
| Epigallocatechin           | 1                | 0.926          | 0.869    | 0.890          | 0.861       | 0.626                    | 0.801                      | 0.989                 | 0.803                                   | 0.448                       | 0.847               | 0.713  | 0.486                     | 0.749                       | 0.575                    |
| Procyanidin B1             | 0.926            | 1              | 0.951    | 0.775          | 0.765       | 0.602                    | 0.797                      | 0.920                 | 0.720                                   | 0.555                       | 0.920               | 0.670  | 0.555                     | 0.833                       | 0.541                    |
| Catechin                   | 0.869            | 0.951          | 1        | 0.694          | 0.780       | 0.741                    | 0.849                      | 0.855                 | 0.672                                   | 0.619                       | 0.906               | 0.721  | 0.580                     | 0.845                       | 0.618                    |
| Procyanidin B2             | 0.890            | 0.775          | 0.694    | 1              | 0.840       | 0.685                    | 0.801                      | 0.872                 | 0.900                                   | 0.017                       | 0.764               | 0.713  | 0.428                     | 0.661                       | 0.640                    |
| Epicatechin                | 0.861            | 0.765          | 0.780    | 0.840          | 1           | 0.745                    | 0.885                      | 0.854                 | 0.803                                   | 0.242                       | 0.814               | 0.835  | 0.427                     | 0.756                       | 0.767                    |
| Epigallocatechin gallate   | 0.626            | 0.602          | 0.741    | 0.685          | 0.745       | 1                        | 0.803                      | 0.607                 | 0.634                                   | 0.128                       | 0.686               | 0.816  | 0.434                     | 0.649                       | 0.841                    |
| Procyanidin B1 3-O-gallate | 0.801            | 0.797          | 0.849    | 0.801          | 0.885       | 0.803                    | 1                          | 0.767                 | 0.869                                   | 0.270                       | 0.914               | 0.784  | 0.557                     | 0.877                       | 0.751                    |

|                                       |              |              |              |              |              |              |              |              |              |              |              |             |              |              |              |
|---------------------------------------|--------------|--------------|--------------|--------------|--------------|--------------|--------------|--------------|--------------|--------------|--------------|-------------|--------------|--------------|--------------|
| Gallocatechin gallate                 | <b>0.989</b> | <b>0.920</b> | <b>0.855</b> | <b>0.872</b> | <b>0.854</b> | <b>0.607</b> | <b>0.767</b> | <b>1</b>     | <b>0.746</b> | <b>0.457</b> | <b>0.828</b> | <b>0.71</b> | <b>0.449</b> | <b>0.735</b> | <b>0.572</b> |
| Quercetin 3-O-digallocatechin/gallate | <b>0.803</b> | <b>0.720</b> | <b>0.672</b> | <b>0.900</b> | <b>0.803</b> | <b>0.634</b> | <b>0.869</b> | <b>0.746</b> | <b>1</b>     | 0.050        | <b>0.809</b> | <b>0.59</b> | <b>0.470</b> | <b>0.739</b> | <b>0.550</b> |
| Myricetin 3-O-galactoside 1           | <b>0.448</b> | <b>0.555</b> | <b>0.619</b> | 0.017        | 0.242        | 0.128        | 0.270        | <b>0.457</b> | 0.050        | <b>1</b>     | <b>0.447</b> | 0.12        | 0.160        | <b>0.496</b> | 0.002        |
| Epicatechin gallate                   | <b>0.847</b> | <b>0.920</b> | <b>0.906</b> | <b>0.764</b> | <b>0.814</b> | <b>0.686</b> | <b>0.914</b> | <b>0.828</b> | <b>0.809</b> | <b>0.447</b> | <b>1</b>     | <b>0.72</b> | <b>0.548</b> | <b>0.955</b> | <b>0.657</b> |
| Rutin                                 | <b>0.713</b> | <b>0.670</b> | <b>0.721</b> | <b>0.713</b> | <b>0.835</b> | <b>0.816</b> | <b>0.784</b> | <b>0.711</b> | <b>0.599</b> | 0.129        | <b>0.725</b> | <b>1</b>    | <b>0.657</b> | <b>0.599</b> | <b>0.970</b> |
| Quercetin 3-O-galactoside             | <b>0.486</b> | <b>0.555</b> | <b>0.580</b> | 0.428        | 0.427        | 0.434        | <b>0.557</b> | <b>0.449</b> | <b>0.470</b> | 0.160        | <b>0.548</b> | <b>0.65</b> | <b>1</b>     | 0.329        | <b>0.577</b> |
| Kaempferol 3-O-rutinoside 2           | <b>0.749</b> | <b>0.833</b> | <b>0.845</b> | <b>0.661</b> | <b>0.756</b> | <b>0.649</b> | <b>0.877</b> | <b>0.735</b> | <b>0.739</b> | <b>0.496</b> | <b>0.955</b> | <b>0.59</b> | 0.329        | <b>1</b>     | <b>0.570</b> |
| Kaempferol 3-O-glucoside              | <b>0.575</b> | <b>0.541</b> | <b>0.618</b> | <b>0.640</b> | <b>0.767</b> | <b>0.841</b> | <b>0.751</b> | <b>0.572</b> | <b>0.550</b> | 0.002        | <b>0.657</b> | <b>0.97</b> | <b>0.577</b> | <b>0.570</b> | <b>1</b>     |
| Unknown quercetin conjugate           | <b>0.797</b> | <b>0.915</b> | <b>0.843</b> | <b>0.612</b> | <b>0.543</b> | 0.368        | <b>0.627</b> | <b>0.795</b> | <b>0.602</b> | <b>0.653</b> | <b>0.809</b> | 0.34        | 0.374        | <b>0.780</b> | 0.208        |
| Unknown kaempferol conjugate          | <b>0.908</b> | <b>0.928</b> | <b>0.892</b> | <b>0.816</b> | <b>0.803</b> | <b>0.711</b> | <b>0.746</b> | <b>0.929</b> | <b>0.640</b> | 0.420        | <b>0.840</b> | <b>0.79</b> | <b>0.486</b> | <b>0.747</b> | <b>0.692</b> |
| Total flavonoids                      | <b>0.925</b> | <b>0.965</b> | <b>0.990</b> | <b>0.782</b> | <b>0.837</b> | <b>0.754</b> | <b>0.878</b> | <b>0.909</b> | <b>0.747</b> | <b>0.558</b> | <b>0.921</b> | <b>0.75</b> | <b>0.574</b> | <b>0.850</b> | <b>0.644</b> |
| Caffeine                              | <b>0.934</b> | <b>0.823</b> | <b>0.731</b> | <b>0.983</b> | <b>0.814</b> | <b>0.648</b> | <b>0.782</b> | <b>0.916</b> | <b>0.872</b> | 0.133        | <b>0.779</b> | <b>0.70</b> | 0.441        | <b>0.674</b> | <b>0.610</b> |
| Ethoxyacetic acid                     | -0.273       | -0.090       | -0.181       | -0.237       | -0.236       | -0.287       | -0.223       | -0.252       | -0.214       | -0.128       | -0.064       | -           | -0.197       | -0.022       | -0.129       |
| Acetic acid                           | 0.295        | <b>0.532</b> | <b>0.551</b> | 0.156        | 0.233        | 0.281        | 0.279        | 0.294        | 0.160        | 0.406        | 0.425        | 0.18        | 0.289        | 0.401        | 0.220        |
| Pterin-6-carboxylic acid              | 0.267        | <b>0.453</b> | 0.395        | 0.332        | 0.185        | 0.228        | 0.273        | 0.261        | 0.291        | 0.011        | 0.345        | 0.07        | 0.138        | 0.288        | 0.025        |
| Hexanoic acid                         | -0.223       | -0.012       | 0.005        | -0.141       | -0.201       | 0.014        | 0.007        | -0.247       | -0.122       | -0.182       | 0.064        | 0.04        | 0.187        | -0.002       | 0.049        |
| Octanoic acid                         | 0.034        | 0.077        | -0.055       | 0.114        | -0.184       | -0.130       | -0.202       | 0.043        | 0.016        | -0.120       | 0.032        | -           | -0.020       | -0.053       | -0.197       |
| Nonanoic acid                         | 0.428        | <b>0.661</b> | <b>0.656</b> | 0.373        | 0.411        | <b>0.445</b> | <b>0.468</b> | 0.443        | 0.329        | 0.269        | <b>0.589</b> | <b>0.47</b> | 0.422        | <b>0.528</b> | 0.440        |
| Total acid                            | -0.158       | 0.018        | -0.029       | -0.062       | -0.234       | -0.055       | -0.091       | -0.170       | -0.089       | -0.189       | 0.055        | -           | 0.120        | -0.029       | -0.055       |
| 2-Methyl-1-propanol                   | 0.398        | <b>0.628</b> | <b>0.555</b> | 0.388        | 0.272        | 0.287        | <b>0.446</b> | 0.409        | 0.333        | 0.240        | <b>0.593</b> | 0.28        | 0.191        | <b>0.599</b> | 0.252        |
| 2-Pentanol                            | 0.428        | <b>0.661</b> | <b>0.656</b> | 0.373        | 0.411        | <b>0.445</b> | <b>0.468</b> | 0.443        | 0.329        | 0.269        | <b>0.589</b> | <b>0.47</b> | 0.422        | <b>0.528</b> | 0.440        |
| 1-Butanol                             | 0.428        | <b>0.661</b> | <b>0.656</b> | 0.373        | 0.411        | <b>0.445</b> | <b>0.468</b> | 0.443        | 0.329        | 0.269        | <b>0.589</b> | <b>0.47</b> | 0.422        | <b>0.528</b> | 0.440        |
| 2-Hexanol                             | 0.212        | 0.357        | 0.339        | -0.053       | 0.170        | -0.067       | 0.164        | 0.256        | -0.069       | <b>0.568</b> | 0.336        | 0.10        | 0.019        | 0.382        | 0.017        |
| 3-Methyl-1-butanol                    | 0.346        | <b>0.547</b> | <b>0.470</b> | 0.348        | 0.211        | 0.267        | 0.244        | 0.362        | 0.260        | 0.138        | <b>0.468</b> | 0.29        | 0.311        | 0.374        | 0.226        |
| 1-(2-Aminoethylamino)-2-propanol      | 0.094        | 0.258        | 0.323        | 0.071        | 0.174        | 0.315        | 0.249        | 0.119        | 0.147        | 0.199        | 0.286        | 0.12        | 0.018        | 0.374        | 0.207        |

|                                        |              |              |              |               |               |              |               |              |               |        |              |             |              |              |              |
|----------------------------------------|--------------|--------------|--------------|---------------|---------------|--------------|---------------|--------------|---------------|--------|--------------|-------------|--------------|--------------|--------------|
| 2-Octen-4-ol                           | <b>0.853</b> | <b>0.798</b> | <b>0.692</b> | <b>0.839</b>  | <b>0.643</b>  | <b>0.446</b> | <b>0.673</b>  | <b>0.798</b> | <b>0.835</b>  | 0.252  | <b>0.740</b> | <b>0.45</b> | 0.381        | <b>0.646</b> | 0.331        |
| 3-Methyl-1-pentanol                    | 0.428        | <b>0.661</b> | <b>0.656</b> | 0.373         | 0.411         | <b>0.445</b> | <b>0.468</b>  | 0.443        | 0.329         | 0.269  | <b>0.589</b> | <b>0.47</b> | 0.422        | <b>0.528</b> | 0.440        |
| (E)-3-Hexen-1-ol                       | -0.005       | 0.159        | 0.217        | -0.028        | -0.005        | 0.156        | 0.144         | -0.033       | -0.021        | -0.043 | 0.124        | 0.34        | <b>0.777</b> | -0.083       | 0.308        |
| 1-Hexanol                              | 0.039        | 0.231        | 0.190        | 0.053         | 0.188         | 0.099        | 0.194         | 0.041        | 0.103         | -0.030 | 0.293        | 0.15        | -0.040       | 0.302        | 0.168        |
| 2-Methyl-4-heptanol                    | -0.148       | 0.002        | -0.039       | -0.113        | 0.033         | -0.068       | 0.028         | -0.155       | -0.039        | -0.120 | 0.110        | 0.00        | -0.189       | 0.157        | 0.041        |
| 2-Ethyl-1-hexanol                      | 0.309        | 0.343        | 0.340        | 0.331         | 0.253         | 0.312        | 0.281         | 0.259        | 0.247         | 0.002  | 0.281        | <b>0.45</b> | <b>0.447</b> | 0.168        | 0.412        |
| Linalool                               | <b>0.793</b> | <b>0.734</b> | <b>0.749</b> | <b>0.727</b>  | <b>0.774</b>  | <b>0.610</b> | <b>0.867</b>  | <b>0.712</b> | <b>0.854</b>  | 0.322  | <b>0.810</b> | <b>0.65</b> | <b>0.525</b> | <b>0.740</b> | <b>0.579</b> |
| 1-Octanol                              | <b>0.832</b> | <b>0.726</b> | <b>0.694</b> | <b>0.767</b>  | <b>0.789</b>  | <b>0.504</b> | <b>0.761</b>  | <b>0.758</b> | <b>0.830</b>  | 0.289  | <b>0.723</b> | <b>0.62</b> | <b>0.460</b> | <b>0.636</b> | <b>0.515</b> |
| 2,3-Butanediol                         | 0.380        | <b>0.573</b> | <b>0.547</b> | 0.440         | 0.403         | <b>0.468</b> | <b>0.471</b>  | 0.381        | 0.386         | 0.047  | <b>0.552</b> | 0.43        | 0.315        | <b>0.492</b> | 0.433        |
| Phenylethyl alcohol                    | -0.311       | -0.073       | 0.041        | -0.264        | -0.169        | 0.079        | 0.085         | -0.343       | -0.199        | -0.078 | 0.045        | 0.11        | 0.274        | 0.049        | 0.178        |
| Total alcohol                          | -0.040       | 0.213        | 0.290        | -0.080        | 0.081         | 0.162        | 0.308         | -0.074       | 0.002         | 0.140  | 0.333        | 0.26        | 0.314        | 0.338        | 0.278        |
| 3-Hydroxybutanal                       | -0.029       | 0.128        | 0.257        | 0.024         | 0.170         | <b>0.481</b> | 0.165         | -0.015       | -0.022        | -0.067 | 0.124        | 0.38        | 0.233        | 0.100        | <b>0.463</b> |
| Octanal                                | -0.257       | -0.084       | -0.173       | -0.191        | -0.232        | -0.273       | -0.265        | -0.230       | -0.190        | -0.100 | -0.101       | -           | -0.413       | -0.003       | -0.308       |
| Total aldehyde                         | -0.257       | -0.084       | -0.173       | -0.191        | -0.232        | -0.273       | -0.265        | -0.230       | -0.190        | -0.100 | -0.101       | -           | -0.413       | -0.003       | -0.308       |
| Benzaldehyde                           | -0.319       | -0.075       | 0.056        | -0.274        | -0.125        | 0.102        | 0.113         | -0.345       | -0.186        | -0.065 | 0.049        | 0.12        | 0.236        | 0.086        | 0.212        |
| Myristicin                             | 0.151        | 0.193        | 0.119        | 0.129         | 0.202         | 0.012        | 0.069         | 0.144        | 0.207         | 0.041  | 0.212        | 0.15        | 0.099        | 0.182        | 0.149        |
| Benzeneacetaldehyde                    | -0.217       | 0.023        | 0.041        | -0.240        | -0.111        | -0.049       | 0.001         | -0.244       | -0.166        | -0.081 | 0.062        | 0.15        | 0.414        | -0.040       | 0.171        |
| Naphthalene                            | 0.428        | <b>0.661</b> | <b>0.656</b> | 0.373         | 0.411         | <b>0.445</b> | <b>0.468</b>  | 0.443        | 0.329         | 0.269  | <b>0.589</b> | <b>0.47</b> | 0.422        | <b>0.528</b> | 0.440        |
| 1,2-Dihydro-1,1,6-trimethylnaphthalene | 0.428        | <b>0.661</b> | <b>0.656</b> | 0.373         | 0.411         | <b>0.445</b> | <b>0.468</b>  | 0.443        | 0.329         | 0.269  | <b>0.589</b> | <b>0.47</b> | 0.422        | <b>0.528</b> | 0.440        |
| Benzyl alcohol                         | -0.337       | -0.086       | -0.035       | -0.290        | -0.107        | -0.028       | 0.034         | -0.362       | -0.188        | -0.126 | 0.058        | 0.05        | 0.059        | 0.100        | 0.135        |
| Total benzenoid                        | -0.340       | -0.086       | -0.028       | -0.295        | -0.110        | -0.020       | 0.040         | -0.365       | -0.192        | -0.123 | 0.057        | 0.06        | 0.089        | 0.094        | 0.147        |
| Ethyl butanoate                        | 0.122        | 0.275        | 0.122        | 0.060         | -0.036        | -0.214       | -0.005        | 0.173        | -0.013        | 0.165  | 0.249        | -           | -0.057       | 0.242        | -0.136       |
| Ethyl 3-methylbutanoate                | 0.428        | <b>0.661</b> | <b>0.656</b> | 0.373         | 0.411         | <b>0.445</b> | <b>0.468</b>  | 0.443        | 0.329         | 0.269  | <b>0.589</b> | <b>0.47</b> | 0.422        | <b>0.528</b> | 0.440        |
| 3-Methylbutyl acetate                  | 0.428        | <b>0.661</b> | <b>0.656</b> | 0.373         | 0.411         | <b>0.445</b> | <b>0.468</b>  | 0.443        | 0.329         | 0.269  | <b>0.589</b> | <b>0.47</b> | 0.422        | <b>0.528</b> | 0.440        |
| 3-Hydroxymandelic acid ethyl ester     | -0.373       | -0.241       | -0.262       | <b>-0.503</b> | <b>-0.463</b> | -0.421       | <b>-0.464</b> | -0.364       | <b>-0.488</b> | 0.064  | -0.336       | -           | 0.109        | -0.390       | -0.220       |
| Ethyl hexanoate                        | <b>0.528</b> | <b>0.471</b> | 0.419        | <b>0.484</b>  | 0.434         | 0.152        | <b>0.490</b>  | 0.418        | <b>0.690</b>  | 0.200  | <b>0.450</b> | 0.14        | 0.272        | 0.406        | 0.057        |

|                          |              |              |              |               |               |              |               |              |               |       |              |             |              |              |              |
|--------------------------|--------------|--------------|--------------|---------------|---------------|--------------|---------------|--------------|---------------|-------|--------------|-------------|--------------|--------------|--------------|
|                          |              |              |              |               |               |              |               |              |               |       |              | 9           |              |              |              |
| Hexyl acetate            | 0.400        | 0.443        | <b>0.462</b> | <b>0.447</b>  | <b>0.482</b>  | <b>0.528</b> | 0.421         | 0.388        | 0.403         | 0.055 | 0.443        | 0.34        | -0.043       | 0.432        | 0.319        |
| Ethyl (E)-3-hexenoate    | 0.228        | 0.197        | 0.286        | 0.138         | 0.326         | 0.355        | 0.298         | 0.238        | 0.115         | 0.101 | 0.241        | <b>0.65</b> | <b>0.661</b> | 0.098        | <b>0.627</b> |
| Ethyl lactate            | 0.012        | 0.263        | 0.353        | -0.089        | 0.050         | 0.193        | 0.203         | -0.015       | 0.009         | 0.359 | 0.327        | 0.08        | 0.088        | 0.399        | 0.099        |
| Propyl hexanoate         | 0.428        | <b>0.661</b> | <b>0.656</b> | 0.373         | 0.411         | <b>0.445</b> | <b>0.468</b>  | 0.443        | 0.329         | 0.269 | <b>0.589</b> | <b>0.47</b> | 0.422        | <b>0.528</b> | 0.440        |
| Ethyl octanoate          | 0.428        | <b>0.661</b> | <b>0.656</b> | 0.373         | 0.411         | <b>0.445</b> | <b>0.468</b>  | 0.443        | 0.329         | 0.269 | <b>0.589</b> | <b>0.47</b> | 0.422        | <b>0.528</b> | 0.440        |
| Ethyl 3-hydroxybutanoate | -0.046       | 0.195        | 0.270        | 0.007         | -0.107        | 0.325        | 0.136         | -0.055       | 0.010         | 0.041 | 0.222        | 0.08        | 0.135        | 0.223        | 0.130        |
| Ethyl nonanoate          | 0.233        | <b>0.487</b> | <b>0.489</b> | 0.222         | 0.193         | 0.248        | 0.309         | 0.231        | 0.210         | 0.179 | 0.398        | 0.21        | 0.317        | 0.369        | 0.181        |
| Isoamyl lactate          | 0.270        | <b>0.510</b> | <b>0.506</b> | 0.298         | 0.313         | 0.380        | 0.438         | 0.262        | 0.332         | 0.133 | <b>0.558</b> | 0.38        | 0.359        | <b>0.552</b> | 0.415        |
| Methyl decanoate         | 0.428        | <b>0.661</b> | <b>0.656</b> | 0.373         | 0.411         | <b>0.445</b> | <b>0.468</b>  | 0.443        | 0.329         | 0.269 | <b>0.589</b> | <b>0.47</b> | 0.422        | <b>0.528</b> | 0.440        |
| Ethyl 2-furancarboxylate | <b>0.507</b> | <b>0.669</b> | <b>0.673</b> | <b>0.505</b>  | <b>0.551</b>  | <b>0.596</b> | <b>0.583</b>  | <b>0.520</b> | <b>0.446</b>  | 0.137 | <b>0.646</b> | <b>0.66</b> | <b>0.529</b> | <b>0.538</b> | <b>0.642</b> |
| Ethyl decanoate          | 0.428        | <b>0.661</b> | <b>0.656</b> | 0.373         | 0.411         | <b>0.445</b> | <b>0.468</b>  | 0.443        | 0.329         | 0.269 | <b>0.589</b> | <b>0.47</b> | 0.422        | <b>0.528</b> | 0.440        |
| Diethyl succinate        | 0.428        | <b>0.661</b> | <b>0.656</b> | 0.373         | 0.411         | <b>0.445</b> | <b>0.468</b>  | 0.443        | 0.329         | 0.269 | <b>0.589</b> | <b>0.47</b> | 0.422        | <b>0.528</b> | 0.440        |
| Ethyl 9-decenoate        | 0.428        | <b>0.661</b> | <b>0.656</b> | 0.373         | 0.411         | <b>0.445</b> | <b>0.468</b>  | 0.443        | 0.329         | 0.269 | <b>0.589</b> | <b>0.47</b> | 0.422        | <b>0.528</b> | 0.440        |
| Ethyl benzeneacetate     | 0.428        | <b>0.661</b> | <b>0.656</b> | 0.373         | 0.411         | <b>0.445</b> | <b>0.468</b>  | 0.443        | 0.329         | 0.269 | <b>0.589</b> | <b>0.47</b> | 0.422        | <b>0.528</b> | 0.440        |
| 2-Phenethyl acetate      | 0.428        | <b>0.661</b> | <b>0.656</b> | 0.373         | 0.411         | <b>0.445</b> | <b>0.468</b>  | 0.443        | 0.329         | 0.269 | <b>0.589</b> | <b>0.47</b> | 0.422        | <b>0.528</b> | 0.440        |
| Ethyl dodecanoate        | 0.428        | <b>0.661</b> | <b>0.656</b> | 0.373         | 0.411         | <b>0.445</b> | <b>0.468</b>  | 0.443        | 0.329         | 0.269 | <b>0.589</b> | <b>0.47</b> | 0.422        | <b>0.528</b> | 0.440        |
| Total ester              | -0.361       | -0.230       | -0.249       | <b>-0.493</b> | <b>-0.447</b> | -0.405       | <b>-0.449</b> | -0.351       | <b>-0.479</b> | 0.069 | -0.323       | -           | 0.133        | -0.382       | -0.196       |
|                          |              |              |              |               |               |              |               |              |               |       |              | 0.19        |              |              |              |
| 3-Hydroxy-2-butanone     | 0.428        | <b>0.661</b> | <b>0.656</b> | 0.373         | 0.411         | <b>0.445</b> | <b>0.468</b>  | 0.443        | 0.329         | 0.269 | <b>0.589</b> | <b>0.47</b> | 0.422        | <b>0.528</b> | 0.440        |
| Limonene                 | <b>0.717</b> | <b>0.885</b> | <b>0.864</b> | <b>0.611</b>  | <b>0.648</b>  | <b>0.566</b> | <b>0.720</b>  | <b>0.727</b> | <b>0.553</b>  | 0.435 | <b>0.831</b> | <b>0.67</b> | <b>0.567</b> | <b>0.759</b> | <b>0.598</b> |
| Terpinolene              | -0.168       | 0.042        | 0.144        | -0.170        | -0.107        | 0.177        | 0.060         | -0.168       | -0.051        | 0.052 | 0.061        | 0.02        | 0.254        | 0.064        | 0.101        |
| Total terpene            | <b>0.735</b> | <b>0.893</b> | <b>0.864</b> | <b>0.636</b>  | <b>0.659</b>  | <b>0.567</b> | <b>0.727</b>  | <b>0.745</b> | <b>0.572</b>  | 0.422 | <b>0.840</b> | <b>0.68</b> | <b>0.569</b> | <b>0.764</b> | <b>0.602</b> |
|                          |              |              |              |               |               |              |               |              |               |       |              | 0           |              |              |              |
|                          |              |              |              |               |               |              |               |              |               |       |              | 1           |              |              |              |

Values in **bold** indicate significant ( $p < 0.05$ ) correlation

**Table S7** Correlation matrix of quantified phenolic and volatile compounds, physicochemical properties and tested responses of tea-macerated model wines

(continued 3/7)

| Variables                              | Unknown quercetin conjugate | Unknown kaempferol conjugates | Total flavonoids | Caffeine      | Ethoxyacetic acid | Acetic acid   | Pterin-6-carboxylic acid | Hexanoic acid | Octanoic acid | Nonanoic acid | Total acid | 2-Methyl-1-propanol | 2-Pentanol    | 1-Butanol     | 2-Hexanol    |
|----------------------------------------|-----------------------------|-------------------------------|------------------|---------------|-------------------|---------------|--------------------------|---------------|---------------|---------------|------------|---------------------|---------------|---------------|--------------|
| TA                                     | <b>-0.596</b>               | <b>-0.641</b>                 | <b>-0.694</b>    | <b>-0.453</b> | -0.409            | <b>-0.813</b> | <b>-0.655</b>            | -0.343        | -0.068        | <b>-0.956</b> | -0.282     | <b>-0.756</b>       | <b>-0.956</b> | <b>-0.956</b> | -0.244       |
| pH                                     | <b>0.558</b>                | <b>0.601</b>                  | <b>0.668</b>     | <b>0.451</b>  | 0.394             | <b>0.735</b>  | <b>0.650</b>             | 0.415         | 0.062         | <b>0.901</b>  | 0.332      | <b>0.748</b>        | <b>0.901</b>  | <b>0.901</b>  | 0.252        |
| TPC                                    | <b>0.816</b>                | <b>0.826</b>                  | <b>0.942</b>     | <b>0.866</b>  | -0.274            | 0.392         | 0.362                    | -0.126        | -0.016        | <b>0.470</b>  | -0.108     | 0.438               | <b>0.470</b>  | <b>0.470</b>  | 0.153        |
| TFC                                    | <b>0.763</b>                | <b>0.757</b>                  | <b>0.813</b>     | <b>0.745</b>  | -0.156            | 0.374         | <b>0.476</b>             | -0.089        | 0.126         | <b>0.530</b>  | -0.018     | 0.421               | <b>0.530</b>  | <b>0.530</b>  | 0.186        |
| DPPH                                   | <b>0.832</b>                | <b>0.920</b>                  | <b>0.941</b>     | <b>0.869</b>  | -0.159            | 0.379         | 0.247                    | -0.157        | -0.024        | <b>0.524</b>  | -0.132     | <b>0.521</b>        | <b>0.524</b>  | <b>0.524</b>  | 0.369        |
| FRAP                                   | <b>0.769</b>                | <b>0.903</b>                  | <b>0.931</b>     | <b>0.919</b>  | -0.282            | 0.269         | 0.193                    | -0.194        | 0.024         | 0.411         | -0.140     | 0.402               | 0.411         | 0.411         | 0.238        |
| ABTS                                   | <b>0.828</b>                | <b>0.875</b>                  | <b>0.930</b>     | <b>0.910</b>  | -0.246            | 0.289         | 0.243                    | -0.212        | -0.051        | 0.424         | -0.186     | <b>0.459</b>        | 0.424         | 0.424         | 0.282        |
| L*                                     | -0.176                      | -0.225                        | -0.381           | -0.055        | -0.078            | <b>-0.513</b> | -0.343                   | <b>-0.467</b> | 0.193         | <b>-0.571</b> | -0.255     | -0.410              | <b>-0.571</b> | <b>-0.571</b> | 0.052        |
| a*                                     | 0.034                       | 0.052                         | 0.237            | -0.053        | -0.055            | 0.316         | 0.242                    | <b>0.493</b>  | -0.222        | 0.354         | 0.260      | 0.262               | 0.354         | 0.354         | -0.136       |
| b*                                     | 0.343                       | 0.399                         | <b>0.538</b>     | 0.200         | 0.185             | <b>0.666</b>  | <b>0.451</b>             | 0.404         | -0.184        | <b>0.758</b>  | 0.214      | <b>0.545</b>        | <b>0.758</b>  | <b>0.758</b>  | 0.113        |
| Quinic acid                            | 0.014                       | <b>0.545</b>                  | <b>0.469</b>     | 0.431         | -0.125            | 0.199         | 0.045                    | 0.197         | -0.176        | 0.394         | 0.062      | 0.221               | 0.394         | 0.394         | -0.094       |
| Gallic acid                            | <b>0.894</b>                | <b>0.538</b>                  | <b>0.743</b>     | <b>0.592</b>  | -0.158            | 0.386         | <b>0.464</b>             | -0.040        | 0.067         | 0.396         | -0.007     | <b>0.477</b>        | 0.396         | 0.396         | 0.274        |
| Chlorogenic acid                       | <b>0.859</b>                | <b>0.902</b>                  | <b>0.890</b>     | <b>0.893</b>  | -0.213            | 0.272         | 0.281                    | -0.188        | 0.101         | 0.439         | -0.102     | <b>0.484</b>        | 0.439         | 0.439         | 0.330        |
| Total phenolic acids                   | <b>0.804</b>                | <b>0.851</b>                  | <b>0.961</b>     | <b>0.824</b>  | -0.222            | <b>0.447</b>  | 0.417                    | 0.059         | -0.039        | <b>0.592</b>  | 0.018      | <b>0.558</b>        | <b>0.592</b>  | <b>0.592</b>  | 0.198        |
| Gallocatechin                          | <b>0.775</b>                | <b>0.853</b>                  | <b>0.972</b>     | <b>0.813</b>  | -0.215            | <b>0.480</b>  | 0.412                    | -0.011        | -0.068        | <b>0.604</b>  | -0.047     | <b>0.507</b>        | <b>0.604</b>  | <b>0.604</b>  | 0.165        |
| Epigallocatechin                       | <b>0.797</b>                | <b>0.908</b>                  | <b>0.925</b>     | <b>0.934</b>  | -0.273            | 0.295         | 0.267                    | -0.223        | 0.034         | 0.428         | -0.158     | 0.398               | 0.428         | 0.428         | 0.212        |
| Procyanidin B1                         | <b>0.915</b>                | <b>0.928</b>                  | <b>0.965</b>     | <b>0.823</b>  | -0.090            | <b>0.532</b>  | <b>0.453</b>             | -0.012        | 0.077         | <b>0.661</b>  | 0.018      | <b>0.628</b>        | <b>0.661</b>  | <b>0.661</b>  | 0.357        |
| Catechin                               | <b>0.843</b>                | <b>0.892</b>                  | <b>0.990</b>     | <b>0.731</b>  | -0.181            | <b>0.551</b>  | 0.395                    | 0.005         | -0.055        | <b>0.656</b>  | -0.029     | <b>0.555</b>        | <b>0.656</b>  | <b>0.656</b>  | 0.339        |
| Procyanidin B2                         | <b>0.612</b>                | <b>0.816</b>                  | <b>0.782</b>     | <b>0.983</b>  | -0.237            | 0.156         | 0.332                    | -0.141        | 0.114         | 0.373         | -0.062     | 0.388               | 0.373         | 0.373         | -0.053       |
| Epicatechin                            | <b>0.543</b>                | <b>0.803</b>                  | <b>0.837</b>     | <b>0.814</b>  | -0.236            | 0.233         | 0.185                    | -0.201        | -0.184        | 0.411         | -0.234     | 0.272               | 0.411         | 0.411         | 0.170        |
| Epigallocatechin gallate               | 0.368                       | <b>0.711</b>                  | <b>0.754</b>     | <b>0.648</b>  | -0.287            | 0.281         | 0.228                    | 0.014         | -0.130        | <b>0.445</b>  | -0.055     | 0.287               | <b>0.445</b>  | <b>0.445</b>  | -0.067       |
| Procyanidin B1 3-O-gallate             | <b>0.627</b>                | <b>0.746</b>                  | <b>0.878</b>     | <b>0.782</b>  | -0.223            | 0.279         | 0.273                    | 0.007         | -0.202        | <b>0.468</b>  | -0.091     | <b>0.446</b>        | <b>0.468</b>  | <b>0.468</b>  | 0.164        |
| Gallocatechin gallate                  | <b>0.795</b>                | <b>0.929</b>                  | <b>0.909</b>     | <b>0.916</b>  | -0.252            | 0.294         | 0.261                    | -0.247        | 0.043         | 0.443         | -0.170     | 0.409               | 0.443         | 0.443         | 0.256        |
| Quercetin 3-O-di-galactoside/glucoside | <b>0.602</b>                | <b>0.640</b>                  | <b>0.747</b>     | <b>0.872</b>  | -0.214            | 0.160         | 0.291                    | -0.122        | 0.016         | 0.329         | -0.089     | 0.333               | 0.329         | 0.329         | -0.069       |
| Myricetin 3-O-galactoside 1            | <b>0.653</b>                | 0.420                         | <b>0.558</b>     | 0.133         | -0.128            | 0.406         | 0.011                    | -0.182        | -0.120        | 0.269         | -0.189     | 0.240               | 0.269         | 0.269         | <b>0.568</b> |
| Epicatechin gallate                    | <b>0.809</b>                | <b>0.840</b>                  | <b>0.921</b>     | <b>0.779</b>  | -0.064            | 0.425         | 0.345                    | 0.064         | 0.032         | <b>0.589</b>  | 0.055      | <b>0.593</b>        | <b>0.589</b>  | <b>0.589</b>  | 0.336        |
| Rutin                                  | 0.345                       | <b>0.796</b>                  | <b>0.751</b>     | <b>0.701</b>  | -0.187            | 0.256         | 0.071                    | 0.046         | -0.125        | <b>0.474</b>  | -0.028     | 0.282               | <b>0.474</b>  | <b>0.474</b>  | 0.106        |
| Quercetin 3-O-galactoside              | 0.374                       | <b>0.486</b>                  | <b>0.574</b>     | 0.441         | -0.197            | 0.289         | 0.138                    | 0.187         | -0.020        | 0.422         | 0.120      | 0.191               | 0.422         | 0.422         | 0.019        |

|                                  |              |              |              |              |              |              |              |              |              |              |              |              |              |              |              |
|----------------------------------|--------------|--------------|--------------|--------------|--------------|--------------|--------------|--------------|--------------|--------------|--------------|--------------|--------------|--------------|--------------|
| Kaempferol 3-O-rutinoside 2      | <b>0.780</b> | <b>0.747</b> | <b>0.850</b> | <b>0.674</b> | -0.022       | 0.401        | 0.288        | -0.002       | -0.053       | <b>0.528</b> | -0.029       | <b>0.599</b> | <b>0.528</b> | <b>0.528</b> | 0.382        |
| Kaempferol 3-O-glucoside         | 0.208        | <b>0.692</b> | <b>0.644</b> | <b>0.610</b> | -0.129       | 0.220        | 0.025        | 0.049        | -0.197       | 0.440        | -0.055       | 0.252        | 0.440        | 0.440        | 0.017        |
| Unknown quercetin conjugate      | <b>1</b>     | <b>0.779</b> | <b>0.841</b> | <b>0.672</b> | -0.101       | <b>0.516</b> | <b>0.475</b> | -0.045       | 0.177        | <b>0.566</b> | 0.038        | <b>0.655</b> | <b>0.566</b> | <b>0.566</b> | 0.377        |
| Unknown kaempferol conjugate     | <b>0.779</b> | <b>1</b>     | <b>0.918</b> | <b>0.849</b> | -0.177       | <b>0.451</b> | 0.344        | -0.031       | 0.118        | <b>0.618</b> | 0.020        | <b>0.577</b> | <b>0.618</b> | <b>0.618</b> | 0.264        |
| Total flavonoids                 | <b>0.841</b> | <b>0.918</b> | <b>1</b>     | <b>0.814</b> | -0.212       | <b>0.493</b> | 0.378        | -0.050       | -0.039       | <b>0.616</b> | -0.062       | <b>0.528</b> | <b>0.616</b> | <b>0.616</b> | 0.290        |
| Caffeine                         | <b>0.672</b> | <b>0.849</b> | <b>0.814</b> | <b>1</b>     | -0.245       | 0.167        | 0.290        | -0.184       | 0.092        | 0.361        | -0.103       | 0.407        | 0.361        | 0.361        | 0.025        |
| Ethoxyacetic acid                | -0.101       | -0.177       | -0.212       | -0.245       | <b>1</b>     | <b>0.489</b> | 0.310        | 0.189        | 0.115        | <b>0.468</b> | 0.207        | 0.352        | <b>0.468</b> | <b>0.468</b> | 0.199        |
| Acetic acid                      | <b>0.516</b> | <b>0.451</b> | <b>0.493</b> | 0.167        | <b>0.489</b> | <b>1</b>     | <b>0.556</b> | 0.123        | 0.053        | <b>0.910</b> | 0.118        | <b>0.661</b> | <b>0.910</b> | <b>0.910</b> | 0.147        |
| Pterin-6-carboxylic acid         | <b>0.475</b> | 0.344        | 0.378        | 0.290        | 0.310        | <b>0.556</b> | <b>1</b>     | 0.345        | 0.233        | <b>0.648</b> | 0.354        | <b>0.535</b> | <b>0.648</b> | <b>0.648</b> | -0.066       |
| Hexanoic acid                    | -0.045       | -0.031       | -0.050       | -0.184       | 0.189        | 0.123        | 0.345        | <b>1</b>     | 0.439        | 0.256        | <b>0.921</b> | 0.408        | 0.256        | 0.256        | 0.161        |
| Octanoic acid                    | 0.177        | 0.118        | -0.039       | 0.092        | 0.115        | 0.053        | 0.233        | 0.439        | <b>1</b>     | 0.126        | <b>0.754</b> | 0.201        | 0.126        | 0.126        | -0.083       |
| Nonanoic acid                    | <b>0.566</b> | <b>0.618</b> | <b>0.616</b> | 0.361        | <b>0.468</b> | <b>0.910</b> | <b>0.648</b> | 0.256        | 0.126        | <b>1</b>     | 0.245        | <b>0.739</b> | <b>1.000</b> | <b>1.000</b> | 0.195        |
| Total acid                       | 0.038        | 0.020        | -0.062       | -0.103       | 0.207        | 0.118        | 0.354        | <b>0.921</b> | <b>0.754</b> | 0.245        | <b>1</b>     | 0.387        | 0.245        | 0.245        | 0.084        |
| 2-Methyl-1-propanol              | <b>0.655</b> | <b>0.577</b> | <b>0.528</b> | 0.407        | 0.352        | <b>0.661</b> | <b>0.535</b> | 0.408        | 0.201        | <b>0.739</b> | 0.387        | <b>1</b>     | <b>0.739</b> | <b>0.739</b> | 0.386        |
| 2-Pentanol                       | <b>0.566</b> | <b>0.618</b> | <b>0.616</b> | 0.361        | <b>0.468</b> | <b>0.910</b> | <b>0.648</b> | 0.256        | 0.126        | <b>1.000</b> | 0.245        | <b>0.739</b> | <b>1</b>     | <b>1.000</b> | 0.195        |
| 1-Butanol                        | <b>0.566</b> | <b>0.618</b> | <b>0.616</b> | 0.361        | <b>0.468</b> | <b>0.910</b> | <b>0.648</b> | 0.256        | 0.126        | <b>1.000</b> | 0.245        | <b>0.739</b> | <b>1.000</b> | <b>1</b>     | 0.195        |
| 2-Hexanol                        | 0.377        | 0.264        | 0.290        | 0.025        | 0.199        | 0.147        | -0.066       | 0.161        | -0.083       | 0.195        | 0.084        | 0.386        | 0.195        | 0.195        | <b>1</b>     |
| 3-Methyl-1-butanol               | <b>0.531</b> | <b>0.537</b> | <b>0.448</b> | 0.327        | 0.422        | <b>0.725</b> | <b>0.625</b> | 0.440        | <b>0.653</b> | <b>0.833</b> | <b>0.607</b> | <b>0.676</b> | <b>0.833</b> | <b>0.833</b> | 0.102        |
| 1-(2-Aminoethylamino)-2-propanol | 0.274        | 0.224        | 0.279        | 0.041        | 0.434        | <b>0.733</b> | 0.380        | -0.161       | -0.131       | <b>0.699</b> | -0.168       | 0.380        | <b>0.699</b> | <b>0.699</b> | -0.143       |
| 2-Octen-4-ol                     | <b>0.729</b> | <b>0.681</b> | <b>0.757</b> | <b>0.871</b> | -0.032       | 0.288        | 0.433        | -0.060       | 0.248        | 0.402        | 0.059        | 0.428        | 0.402        | 0.402        | 0.089        |
| 3-Methyl-1-pentanol              | <b>0.566</b> | <b>0.618</b> | <b>0.616</b> | 0.361        | <b>0.468</b> | <b>0.910</b> | <b>0.648</b> | 0.256        | 0.126        | <b>1.000</b> | 0.245        | <b>0.739</b> | <b>1.000</b> | <b>1.000</b> | 0.195        |
| (E)-3-Hexen-1-ol                 | -0.001       | 0.106        | 0.164        | -0.041       | 0.061        | 0.329        | 0.268        | <b>0.512</b> | -0.014       | 0.376        | 0.366        | 0.159        | 0.376        | 0.376        | -0.028       |
| 1-Hexanol                        | 0.139        | 0.178        | 0.161        | 0.034        | <b>0.454</b> | 0.296        | 0.364        | <b>0.509</b> | 0.008        | 0.430        | 0.381        | <b>0.503</b> | 0.430        | 0.430        | <b>0.562</b> |
| 2-Methyl-4-heptanol              | -0.056       | -0.041       | -0.062       | -0.130       | 0.361        | 0.024        | 0.148        | <b>0.469</b> | -0.050       | 0.125        | 0.327        | 0.295        | 0.125        | 0.125        | <b>0.543</b> |
| 2-Ethyl-1-hexanol                | 0.197        | 0.386        | 0.347        | 0.348        | -0.035       | 0.305        | 0.085        | 0.250        | 0.053        | 0.319        | 0.202        | 0.369        | 0.319        | 0.319        | 0.051        |
| Linalool                         | <b>0.572</b> | <b>0.623</b> | <b>0.792</b> | <b>0.749</b> | -0.239       | 0.221        | 0.176        | 0.018        | -0.134       | 0.316        | -0.053       | 0.322        | 0.316        | 0.316        | 0.105        |
| 1-Octanol                        | <b>0.564</b> | <b>0.639</b> | <b>0.757</b> | <b>0.787</b> | -0.145       | 0.293        | 0.173        | -0.127       | -0.055       | 0.358        | -0.122       | 0.288        | 0.358        | 0.358        | 0.057        |
| 2,3-Butanediol                   | <b>0.466</b> | <b>0.554</b> | <b>0.529</b> | 0.395        | <b>0.477</b> | <b>0.824</b> | <b>0.745</b> | 0.322        | 0.155        | <b>0.892</b> | 0.307        | <b>0.763</b> | <b>0.892</b> | <b>0.892</b> | 0.027        |
| Phenylethyl alcohol              | -0.105       | -0.102       | -0.040       | -0.314       | 0.140        | 0.225        | 0.238        | <b>0.765</b> | -0.010       | 0.274        | <b>0.555</b> | 0.311        | 0.274        | 0.274        | 0.031        |
| Total alcohol                    | 0.149        | 0.129        | 0.216        | -0.097       | 0.196        | 0.286        | 0.263        | <b>0.772</b> | -0.044       | 0.383        | <b>0.546</b> | <b>0.504</b> | 0.383        | 0.383        | 0.431        |
| 3-Hydroxybutanal                 | -0.005       | 0.268        | 0.204        | -0.044       | 0.116        | <b>0.617</b> | 0.303        | 0.211        | -0.085       | <b>0.624</b> | 0.116        | 0.282        | <b>0.624</b> | <b>0.624</b> | -0.261       |
| Octanal                          | 0.030        | -0.159       | -0.198       | -0.230       | <b>0.849</b> | <b>0.524</b> | <b>0.487</b> | 0.038        | 0.191        | 0.426        | 0.127        | 0.353        | 0.426        | 0.426        | 0.044        |
| Total aldehyde                   | 0.030        | -0.159       | -0.198       | -0.230       | <b>0.849</b> | <b>0.524</b> | <b>0.487</b> | 0.039        | 0.191        | 0.426        | 0.127        | 0.353        | 0.426        | 0.426        | 0.044        |
| Benzaldehyde                     | -0.109       | -0.101       | -0.029       | -0.328       | 0.180        | 0.279        | 0.196        | <b>0.666</b> | -0.123       | 0.339        | 0.434        | 0.313        | 0.339        | 0.339        | 0.048        |
| Myristicin                       | 0.148        | 0.168        | 0.133        | 0.098        | <b>0.480</b> | <b>0.572</b> | 0.185        | -0.117       | 0.263        | <b>0.526</b> | 0.036        | 0.136        | <b>0.526</b> | <b>0.526</b> | -0.232       |

|                                         |              |              |              |               |              |              |              |              |        |              |              |              |              |              |              |
|-----------------------------------------|--------------|--------------|--------------|---------------|--------------|--------------|--------------|--------------|--------|--------------|--------------|--------------|--------------|--------------|--------------|
| Benzeneacetaldehyde                     | -0.096       | -0.048       | -0.025       | -0.247        | 0.332        | 0.306        | 0.173        | <b>0.636</b> | -0.085 | 0.325        | 0.432        | 0.304        | 0.325        | 0.325        | 0.335        |
| Naphthalene                             | <b>0.566</b> | <b>0.618</b> | <b>0.616</b> | 0.361         | <b>0.468</b> | <b>0.910</b> | <b>0.648</b> | 0.256        | 0.126  | <b>1.000</b> | 0.245        | <b>0.739</b> | <b>1.000</b> | <b>1.000</b> | 0.195        |
| 1,2-Dihydro-1,1,6-trimethyl-naphthalene | <b>0.566</b> | <b>0.618</b> | <b>0.616</b> | 0.361         | <b>0.468</b> | <b>0.910</b> | <b>0.648</b> | 0.256        | 0.126  | <b>1.000</b> | 0.245        | <b>0.739</b> | <b>1.000</b> | <b>1.000</b> | 0.195        |
| Benzyl alcohol                          | -0.135       | -0.129       | -0.104       | -0.337        | 0.372        | 0.252        | 0.189        | <b>0.679</b> | -0.121 | 0.277        | <b>0.449</b> | 0.388        | 0.277        | 0.277        | 0.312        |
| Total benzenoid                         | -0.138       | -0.129       | -0.099       | -0.341        | 0.358        | 0.256        | 0.185        | <b>0.688</b> | -0.127 | 0.284        | <b>0.453</b> | 0.381        | 0.284        | 0.284        | 0.298        |
| Ethyl butanoate                         | 0.320        | 0.167        | 0.108        | 0.101         | <b>0.606</b> | 0.176        | 0.307        | 0.294        | 0.404  | 0.320        | 0.400        | <b>0.453</b> | 0.320        | 0.320        | <b>0.654</b> |
| Ethyl 3-methylbutanoate                 | <b>0.566</b> | <b>0.618</b> | <b>0.616</b> | 0.361         | <b>0.468</b> | <b>0.910</b> | <b>0.648</b> | 0.256        | 0.126  | <b>1.000</b> | 0.245        | <b>0.739</b> | <b>1.000</b> | <b>1.000</b> | 0.195        |
| 3-Methylbutyl acetate                   | <b>0.566</b> | <b>0.618</b> | <b>0.616</b> | 0.361         | <b>0.468</b> | <b>0.910</b> | <b>0.648</b> | 0.256        | 0.126  | <b>1.000</b> | 0.245        | <b>0.739</b> | <b>1.000</b> | <b>1.000</b> | 0.195        |
| 3-Hydroxymandelic acid ethyl ester      | -0.221       | -0.274       | -0.318       | <b>-0.449</b> | <b>0.448</b> | 0.328        | -0.183       | 0.072        | 0.003  | 0.150        | 0.063        | 0.030        | 0.150        | 0.150        | 0.087        |
| Ethyl hexanoate                         | <b>0.470</b> | 0.249        | <b>0.467</b> | <b>0.501</b>  | -0.080       | 0.248        | 0.282        | -0.115       | -0.082 | 0.192        | -0.122       | 0.186        | 0.192        | 0.192        | -0.088       |
| Hexyl acetate                           | 0.324        | <b>0.458</b> | <b>0.472</b> | 0.387         | 0.178        | 0.416        | <b>0.713</b> | 0.258        | 0.235  | <b>0.540</b> | 0.289        | 0.320        | <b>0.540</b> | <b>0.540</b> | -0.065       |
| Ethyl (E)-3-hexenoate                   | -0.069       | 0.292        | 0.277        | 0.157         | -0.152       | 0.050        | -0.413       | 0.055        | -0.132 | 0.192        | -0.022       | -0.100       | 0.192        | 0.192        | 0.157        |
| Ethyl lactate                           | 0.304        | 0.157        | 0.273        | -0.112        | <b>0.496</b> | <b>0.766</b> | 0.391        | 0.396        | 0.152  | <b>0.639</b> | 0.362        | <b>0.572</b> | <b>0.639</b> | <b>0.639</b> | 0.215        |
| Propyl hexanoate                        | <b>0.566</b> | <b>0.618</b> | <b>0.616</b> | 0.361         | <b>0.468</b> | <b>0.910</b> | <b>0.648</b> | 0.256        | 0.126  | <b>1.000</b> | 0.245        | <b>0.739</b> | <b>1.000</b> | <b>1.000</b> | 0.195        |
| Ethyl octanoate                         | <b>0.566</b> | <b>0.618</b> | <b>0.616</b> | 0.361         | <b>0.468</b> | <b>0.910</b> | <b>0.648</b> | 0.256        | 0.126  | <b>1.000</b> | 0.245        | <b>0.739</b> | <b>1.000</b> | <b>1.000</b> | 0.195        |
| Ethyl 3-hydroxybutanoate                | 0.184        | 0.149        | 0.200        | -0.024        | <b>0.478</b> | <b>0.585</b> | <b>0.601</b> | <b>0.565</b> | 0.372  | <b>0.645</b> | <b>0.579</b> | <b>0.509</b> | <b>0.645</b> | <b>0.645</b> | -0.032       |
| Ethyl nonanoate                         | <b>0.482</b> | 0.384        | 0.437        | 0.199         | <b>0.530</b> | <b>0.846</b> | <b>0.639</b> | 0.324        | 0.156  | <b>0.891</b> | 0.310        | <b>0.735</b> | <b>0.891</b> | <b>0.891</b> | 0.246        |
| Isoamyl lactate                         | <b>0.458</b> | <b>0.450</b> | <b>0.469</b> | 0.261         | <b>0.543</b> | <b>0.842</b> | <b>0.541</b> | 0.262        | 0.132  | <b>0.883</b> | 0.254        | <b>0.718</b> | <b>0.883</b> | <b>0.883</b> | 0.079        |
| Methyl decanoate                        | <b>0.566</b> | <b>0.618</b> | <b>0.616</b> | 0.361         | <b>0.468</b> | <b>0.910</b> | <b>0.648</b> | 0.256        | 0.126  | <b>1.000</b> | 0.245        | <b>0.739</b> | <b>1.000</b> | <b>1.000</b> | 0.195        |
| Ethyl 2-furancarboxylate                | <b>0.471</b> | <b>0.682</b> | <b>0.656</b> | <b>0.477</b>  | 0.365        | <b>0.785</b> | <b>0.566</b> | 0.274        | 0.109  | <b>0.943</b> | 0.248        | <b>0.653</b> | <b>0.943</b> | <b>0.943</b> | 0.113        |
| Ethyl decanoate                         | <b>0.566</b> | <b>0.618</b> | <b>0.616</b> | 0.361         | <b>0.468</b> | <b>0.910</b> | <b>0.648</b> | 0.256        | 0.126  | <b>1.000</b> | 0.245        | <b>0.739</b> | <b>1.000</b> | <b>1.000</b> | 0.195        |
| Diethyl succinate                       | <b>0.566</b> | <b>0.618</b> | <b>0.616</b> | 0.361         | <b>0.468</b> | <b>0.910</b> | <b>0.648</b> | 0.256        | 0.126  | <b>1.000</b> | 0.245        | <b>0.739</b> | <b>1.000</b> | <b>1.000</b> | 0.195        |
| Ethyl 9-decenoate                       | <b>0.566</b> | <b>0.618</b> | <b>0.616</b> | 0.361         | <b>0.468</b> | <b>0.910</b> | <b>0.648</b> | 0.256        | 0.126  | <b>1.000</b> | 0.245        | <b>0.739</b> | <b>1.000</b> | <b>1.000</b> | 0.195        |
| Ethyl benzeneacetate                    | <b>0.566</b> | <b>0.618</b> | <b>0.616</b> | 0.361         | <b>0.468</b> | <b>0.910</b> | <b>0.648</b> | 0.256        | 0.126  | <b>1.000</b> | 0.245        | <b>0.739</b> | <b>1.000</b> | <b>1.000</b> | 0.195        |
| 2-Phenethyl acetate                     | <b>0.566</b> | <b>0.618</b> | <b>0.616</b> | 0.361         | <b>0.468</b> | <b>0.910</b> | <b>0.648</b> | 0.256        | 0.126  | <b>1.000</b> | 0.245        | <b>0.739</b> | <b>1.000</b> | <b>1.000</b> | 0.195        |
| Ethyl dodecanoate                       | <b>0.566</b> | <b>0.618</b> | <b>0.616</b> | 0.361         | <b>0.468</b> | <b>0.910</b> | <b>0.648</b> | 0.256        | 0.126  | <b>1.000</b> | 0.245        | <b>0.739</b> | <b>1.000</b> | <b>1.000</b> | 0.195        |
| Total ester                             | -0.220       | -0.261       | -0.304       | -0.439        | 0.441        | 0.328        | -0.195       | 0.075        | -0.001 | 0.157        | 0.063        | 0.028        | 0.157        | 0.157        | 0.094        |
| 3-Hydroxy-2-butanone                    | <b>0.566</b> | <b>0.618</b> | <b>0.616</b> | 0.361         | <b>0.468</b> | <b>0.910</b> | <b>0.648</b> | 0.256        | 0.126  | <b>1.000</b> | 0.245        | <b>0.739</b> | <b>1.000</b> | <b>1.000</b> | 0.195        |
| Limonene                                | <b>0.765</b> | <b>0.830</b> | <b>0.847</b> | <b>0.632</b>  | 0.243        | <b>0.760</b> | <b>0.511</b> | 0.152        | 0.050  | <b>0.901</b> | 0.131        | <b>0.769</b> | <b>0.901</b> | <b>0.901</b> | 0.355        |
| Terpinolene                             | 0.054        | -0.026       | 0.073        | -0.214        | 0.372        | <b>0.681</b> | 0.393        | 0.070        | -0.097 | <b>0.603</b> | 0.014        | 0.213        | <b>0.603</b> | <b>0.603</b> | -0.343       |
| Total terpene                           | <b>0.773</b> | <b>0.843</b> | <b>0.852</b> | <b>0.658</b>  | 0.232        | <b>0.740</b> | <b>0.507</b> | 0.148        | 0.070  | <b>0.890</b> | 0.137        | <b>0.770</b> | <b>0.890</b> | <b>0.890</b> | 0.351        |

Values in **bold** indicate significant ( $p < 0.05$ ) correlation



**Table S7** Correlation matrix of quantified phenolic and volatile compounds, physicochemical properties and tested responses of tea-macerated model wines

(continued 4/7)

| Variables                              | 3-Methyl-1-butanol | 1-(2-Aminoethylamino)-2-propanol | 2-Octen-4-ol  | 3-Methyl-1-pentanol | (E)-3-Hexen-1-ol | 1-Hexanol     | 2-Methyl-4-heptanol | 2-Ethyl-1-hexanol | Linalool      | 1-Octanol     | 2,3-Butanediole | Phenylethyl alcohol | Total alcohol | 3-Hydroxybutanol | Octanol |
|----------------------------------------|--------------------|----------------------------------|---------------|---------------------|------------------|---------------|---------------------|-------------------|---------------|---------------|-----------------|---------------------|---------------|------------------|---------|
| TA                                     | <b>-0.767</b>      | <b>-0.589</b>                    | <b>-0.512</b> | <b>-0.956</b>       | -0.414           | <b>-0.485</b> | -0.204              | -0.388            | <b>-0.490</b> | <b>-0.486</b> | <b>-0.875</b>   | -0.378              | <b>-0.534</b> | <b>-0.515</b>    | -0.322  |
| pH                                     | <b>0.723</b>       | <b>0.510</b>                     | <b>0.523</b>  | <b>0.901</b>        | 0.408            | <b>0.528</b>  | 0.272               | 0.410             | <b>0.526</b>  | <b>0.506</b>  | <b>0.839</b>    | 0.440               | <b>0.608</b>  | <b>0.459</b>     | 0.288   |
| TPC                                    | 0.350              | 0.161                            | <b>0.882</b>  | <b>0.470</b>        | 0.062            | 0.085         | -0.105              | 0.368             | <b>0.877</b>  | <b>0.870</b>  | 0.428           | -0.170              | 0.084         | 0.042            | -0.232  |
| TFC                                    | <b>0.475</b>       | 0.246                            | <b>0.706</b>  | <b>0.530</b>        | 0.033            | 0.130         | -0.082              | 0.132             | <b>0.617</b>  | <b>0.668</b>  | <b>0.509</b>    | -0.145              | 0.062         | 0.089            | -0.006  |
| DPPH                                   | 0.387              | 0.178                            | <b>0.784</b>  | <b>0.524</b>        | 0.066            | 0.100         | -0.107              | 0.308             | <b>0.752</b>  | <b>0.756</b>  | 0.426           | -0.202              | 0.091         | -0.002           | -0.220  |
| FRAP                                   | 0.327              | 0.109                            | <b>0.827</b>  | 0.411               | -0.006           | 0.033         | -0.153              | 0.299             | <b>0.807</b>  | <b>0.803</b>  | 0.355           | -0.294              | -0.020        | -0.026           | -0.312  |
| ABTS                                   | 0.295              | 0.127                            | <b>0.838</b>  | 0.424               | -0.002           | 0.052         | -0.132              | 0.276             | <b>0.816</b>  | <b>0.809</b>  | 0.364           | -0.265              | 0.023         | -0.084           | -0.267  |
| L*                                     | -0.328             | -0.427                           | -0.072        | <b>-0.571</b>       | <b>-0.546</b>    | -0.219        | -0.100              | -0.365            | -0.380        | -0.261        | <b>-0.540</b>   | <b>-0.805</b>       | <b>-0.742</b> | <b>-0.620</b>    | -0.019  |
| a*                                     | 0.147              | 0.286                            | -0.021        | 0.354               | <b>0.468</b>     | 0.141         | 0.081               | 0.287             | 0.352         | 0.213         | 0.359           | <b>0.825</b>        | <b>0.720</b>  | <b>0.512</b>     | -0.094  |
| b*                                     | <b>0.477</b>       | <b>0.528</b>                     | 0.220         | <b>0.758</b>        | <b>0.491</b>     | 0.397         | 0.206               | 0.373             | <b>0.467</b>  | 0.399         | <b>0.678</b>    | <b>0.655</b>        | <b>0.705</b>  | <b>0.645</b>     | 0.116   |
| Quinic acid                            | 0.203              | 0.189                            | 0.171         | 0.394               | 0.265            | 0.156         | 0.042               | 0.416             | <b>0.451</b>  | 0.422         | 0.407           | 0.348               | 0.357         | <b>0.563</b>     | -0.272  |
| Gallic acid                            | 0.340              | 0.146                            | <b>0.771</b>  | 0.396               | 0.071            | 0.086         | -0.071              | 0.156             | <b>0.675</b>  | <b>0.640</b>  | 0.331           | -0.095              | 0.146         | -0.186           | -0.048  |
| Chlorogenic acid                       | 0.391              | 0.109                            | <b>0.796</b>  | 0.439               | -0.031           | 0.059         | -0.129              | 0.212             | <b>0.674</b>  | <b>0.688</b>  | 0.370           | -0.305              | -0.023        | -0.102           | -0.200  |
| Total phenolic acids                   | 0.430              | 0.236                            | <b>0.794</b>  | <b>0.592</b>        | 0.205            | 0.165         | -0.046              | 0.392             | <b>0.869</b>  | <b>0.828</b>  | <b>0.541</b>    | 0.091               | 0.317         | 0.176            | -0.223  |
| Galocatechin                           | 0.423              | 0.301                            | <b>0.772</b>  | <b>0.604</b>        | 0.180            | 0.180         | -0.030              | 0.385             | <b>0.844</b>  | <b>0.794</b>  | <b>0.560</b>    | 0.032               | 0.256         | 0.257            | -0.181  |
| Epigallocatechin                       | 0.346              | 0.094                            | <b>0.853</b>  | 0.428               | -0.005           | 0.039         | -0.148              | 0.309             | <b>0.793</b>  | <b>0.832</b>  | 0.380           | -0.311              | -0.040        | -0.029           | -0.257  |
| Procyanidin B1                         | <b>0.547</b>       | 0.258                            | <b>0.798</b>  | <b>0.661</b>        | 0.159            | 0.231         | 0.002               | 0.343             | <b>0.734</b>  | <b>0.726</b>  | <b>0.573</b>    | -0.073              | 0.213         | 0.128            | -0.084  |
| Catechin                               | <b>0.470</b>       | 0.323                            | <b>0.692</b>  | <b>0.656</b>        | 0.217            | 0.190         | -0.039              | 0.340             | <b>0.749</b>  | <b>0.694</b>  | <b>0.547</b>    | 0.041               | 0.290         | 0.257            | -0.173  |
| Procyanidin B2                         | 0.348              | 0.071                            | <b>0.839</b>  | 0.373               | -0.028           | 0.053         | -0.113              | 0.331             | <b>0.727</b>  | <b>0.767</b>  | 0.440           | -0.264              | -0.080        | 0.024            | -0.191  |
| Epicatechin                            | 0.211              | 0.174                            | <b>0.643</b>  | 0.411               | -0.005           | 0.188         | 0.033               | 0.253             | <b>0.774</b>  | <b>0.789</b>  | 0.403           | -0.169              | 0.081         | 0.170            | -0.232  |
| Epigallocatechin gallate               | 0.267              | 0.315                            | <b>0.446</b>  | <b>0.445</b>        | 0.156            | 0.099         | -0.068              | 0.312             | <b>0.610</b>  | <b>0.504</b>  | <b>0.468</b>    | 0.079               | 0.162         | <b>0.481</b>     | -0.273  |
| Procyanidin B1 3-O-gallate             | 0.244              | 0.249                            | <b>0.673</b>  | <b>0.468</b>        | 0.144            | 0.194         | 0.028               | 0.281             | <b>0.867</b>  | <b>0.761</b>  | <b>0.471</b>    | 0.085               | 0.308         | 0.165            | -0.265  |
| Galocatechin gallate                   | 0.362              | 0.119                            | <b>0.798</b>  | 0.443               | -0.033           | 0.041         | -0.155              | 0.259             | <b>0.712</b>  | <b>0.758</b>  | 0.381           | -0.343              | -0.074        | -0.015           | -0.230  |
| Quercetin 3-O-di-galactoside/glucoside | 0.260              | 0.147                            | <b>0.835</b>  | 0.329               | -0.021           | 0.103         | -0.039              | 0.247             | <b>0.854</b>  | <b>0.830</b>  | 0.386           | -0.199              | 0.002         | -0.022           | -0.190  |
| Myricetin 3-O-galactoside 1            | 0.138              | 0.199                            | 0.252         | 0.269               | -0.043           | -0.030        | -0.120              | 0.002             | 0.322         | 0.289         | 0.047           | -0.078              | 0.140         | -0.067           | -0.100  |
| Epicatechin gallate                    | <b>0.468</b>       | 0.286                            | <b>0.740</b>  | <b>0.589</b>        | 0.124            | 0.293         | 0.110               | 0.281             | <b>0.810</b>  | <b>0.723</b>  | <b>0.552</b>    | 0.045               | 0.333         | 0.124            | -0.101  |
| Rutin                                  | 0.293              | 0.129                            | <b>0.456</b>  | <b>0.474</b>        | 0.346            | 0.158         | 0.002               | <b>0.450</b>      | <b>0.657</b>  | <b>0.624</b>  | 0.438           | 0.110               | 0.261         | 0.381            | -0.363  |
| Quercetin 3-O-galactoside              | 0.311              | 0.018                            | 0.381         | 0.422               | <b>0.777</b>     | -0.040        | -0.189              | <b>0.447</b>      | <b>0.525</b>  | <b>0.460</b>  | 0.315           | 0.274               | 0.314         | 0.233            | -0.413  |

|                                  |              |              |              |              |              |              |              |          |              |              |              |              |              |              |              |
|----------------------------------|--------------|--------------|--------------|--------------|--------------|--------------|--------------|----------|--------------|--------------|--------------|--------------|--------------|--------------|--------------|
| Kaempferol 3-O-rutinoside 2      | 0.374        | 0.374        | <b>0.646</b> | <b>0.528</b> | -0.083       | 0.302        | 0.157        | 0.168    | <b>0.740</b> | <b>0.636</b> | <b>0.492</b> | 0.049        | 0.338        | 0.100        | -0.003       |
| Kaempferol 3-O-glucoside         | 0.226        | 0.207        | 0.331        | 0.440        | 0.308        | 0.168        | 0.041        | 0.412    | <b>0.579</b> | <b>0.515</b> | 0.433        | 0.178        | 0.278        | <b>0.463</b> | -0.308       |
| Unknown quercetin conjugate      | <b>0.531</b> | 0.274        | <b>0.729</b> | <b>0.566</b> | -0.001       | 0.139        | -0.056       | 0.197    | <b>0.572</b> | <b>0.564</b> | <b>0.466</b> | -0.105       | 0.149        | -0.005       | 0.030        |
| Unknown kaempferol conjugate     | <b>0.537</b> | 0.224        | <b>0.681</b> | <b>0.618</b> | 0.106        | 0.178        | -0.041       | 0.386    | <b>0.623</b> | <b>0.639</b> | <b>0.554</b> | -0.102       | 0.129        | 0.268        | -0.159       |
| Total flavonoids                 | <b>0.448</b> | 0.279        | <b>0.757</b> | <b>0.616</b> | 0.164        | 0.161        | -0.062       | 0.347    | <b>0.792</b> | <b>0.757</b> | <b>0.529</b> | -0.040       | 0.216        | 0.204        | -0.198       |
| Caffeine                         | 0.327        | 0.041        | <b>0.871</b> | 0.361        | -0.041       | 0.034        | -0.130       | 0.348    | <b>0.749</b> | <b>0.787</b> | 0.395        | -0.314       | -0.097       | -0.044       | -0.230       |
| Ethoxyacetic acid                | 0.422        | 0.434        | -0.032       | <b>0.468</b> | 0.061        | <b>0.454</b> | 0.361        | -0.035   | -0.239       | -0.145       | <b>0.477</b> | 0.140        | 0.196        | 0.116        | <b>0.849</b> |
| Acetic acid                      | <b>0.725</b> | <b>0.733</b> | 0.288        | <b>0.910</b> | 0.329        | 0.296        | 0.024        | 0.305    | 0.221        | 0.293        | <b>0.824</b> | 0.225        | 0.286        | <b>0.617</b> | <b>0.524</b> |
| Pterin-6-carboxylic acid         | <b>0.625</b> | 0.380        | 0.433        | <b>0.648</b> | 0.268        | 0.364        | 0.148        | 0.085    | 0.176        | 0.173        | <b>0.745</b> | 0.238        | 0.263        | 0.303        | <b>0.487</b> |
| Hexanoic acid                    | 0.440        | -0.161       | -0.060       | 0.256        | <b>0.512</b> | <b>0.509</b> | <b>0.469</b> | 0.250    | 0.018        | -0.127       | 0.322        | <b>0.765</b> | <b>0.772</b> | 0.211        | 0.038        |
| Octanoic acid                    | <b>0.653</b> | -0.131       | 0.248        | 0.126        | -0.014       | 0.008        | -0.050       | 0.053    | -0.134       | -0.055       | 0.155        | -0.010       | -0.044       | -0.085       | 0.191        |
| Nonanoic acid                    | <b>0.833</b> | <b>0.699</b> | 0.402        | <b>1.000</b> | 0.376        | 0.430        | 0.125        | 0.319    | 0.316        | 0.358        | <b>0.892</b> | 0.274        | 0.383        | <b>0.624</b> | 0.426        |
| Total acid                       | <b>0.607</b> | -0.168       | 0.059        | 0.245        | 0.366        | 0.381        | 0.327        | 0.202    | -0.053       | -0.122       | 0.307        | <b>0.555</b> | <b>0.546</b> | 0.116        | 0.127        |
| 2-Methyl-1-propanol              | <b>0.676</b> | 0.380        | 0.428        | <b>0.739</b> | 0.159        | <b>0.503</b> | 0.295        | 0.369    | 0.322        | 0.288        | <b>0.763</b> | 0.311        | <b>0.504</b> | 0.282        | 0.353        |
| 2-Pentanol                       | <b>0.833</b> | <b>0.699</b> | 0.402        | <b>1.000</b> | 0.376        | 0.430        | 0.125        | 0.319    | 0.316        | 0.358        | <b>0.892</b> | 0.274        | 0.383        | <b>0.624</b> | 0.426        |
| 1-Butanol                        | <b>0.833</b> | <b>0.699</b> | 0.402        | <b>1.000</b> | 0.376        | 0.430        | 0.125        | 0.319    | 0.316        | 0.358        | <b>0.892</b> | 0.274        | 0.383        | <b>0.624</b> | 0.426        |
| 2-Hexanol                        | 0.102        | -0.143       | 0.089        | 0.195        | -0.028       | <b>0.562</b> | <b>0.543</b> | 0.051    | 0.105        | 0.057        | 0.027        | 0.031        | 0.431        | -0.261       | 0.044        |
| 3-Methyl-1-butanol               | <b>1</b>     | <b>0.461</b> | <b>0.445</b> | <b>0.833</b> | 0.279        | 0.333        | 0.067        | 0.273    | 0.166        | 0.243        | <b>0.767</b> | 0.204        | 0.268        | 0.429        | 0.431        |
| 1-(2-Aminoethylamino)-2-propanol | <b>0.461</b> | <b>1</b>     | 0.045        | <b>0.699</b> | -0.047       | 0.073        | -0.150       | -0.122   | 0.052        | 0.072        | <b>0.595</b> | 0.069        | -0.006       | <b>0.639</b> | <b>0.513</b> |
| 2-Octen-4-ol                     | <b>0.445</b> | 0.045        | <b>1</b>     | 0.402        | -0.024       | 0.101        | -0.072       | 0.320    | <b>0.787</b> | <b>0.848</b> | 0.422        | -0.269       | -0.017       | -0.212       | -0.025       |
| 3-Methyl-1-pentanol              | <b>0.833</b> | <b>0.699</b> | 0.402        | <b>1</b>     | 0.376        | 0.430        | 0.125        | 0.319    | 0.316        | 0.358        | <b>0.892</b> | 0.274        | 0.383        | <b>0.624</b> | 0.426        |
| (E)-3-Hexen-1-ol                 | 0.279        | -0.047       | -0.024       | 0.376        | <b>1</b>     | 0.096        | -0.014       | 0.426    | 0.121        | 0.041        | 0.375        | <b>0.606</b> | <b>0.517</b> | 0.371        | -0.150       |
| 1-Hexanol                        | 0.333        | 0.073        | 0.101        | 0.430        | 0.096        | <b>1</b>     | <b>0.936</b> | 0.160    | 0.160        | 0.091        | 0.428        | 0.266        | <b>0.585</b> | 0.204        | 0.323        |
| 2-Methyl-4-heptanol              | 0.067        | -0.150       | -0.072       | 0.125        | -0.014       | <b>0.936</b> | <b>1</b>     | 0.096    | 0.036        | -0.056       | 0.154        | 0.271        | <b>0.566</b> | 0.034        | 0.242        |
| 2-Ethyl-1-hexanol                | 0.273        | -0.122       | 0.320        | 0.319        | 0.426        | 0.160        | 0.096        | <b>1</b> | 0.360        | 0.397        | 0.409        | 0.273        | 0.346        | 0.237        | -0.172       |
| Linalool                         | 0.166        | 0.052        | <b>0.787</b> | 0.316        | 0.121        | 0.160        | 0.036        | 0.360    | <b>1</b>     | <b>0.936</b> | 0.322        | 0.001        | 0.253        | -0.026       | -0.347       |
| 1-Octanol                        | 0.243        | 0.072        | <b>0.848</b> | 0.358        | 0.041        | 0.091        | -0.056       | 0.397    | <b>0.936</b> | <b>1</b>     | 0.343        | -0.161       | 0.081        | -0.044       | -0.222       |
| 2,3-Butanediol                   | <b>0.767</b> | <b>0.595</b> | 0.422        | <b>0.892</b> | 0.375        | 0.428        | 0.154        | 0.409    | 0.322        | 0.343        | <b>1</b>     | 0.306        | 0.371        | <b>0.584</b> | <b>0.507</b> |
| Phenylethyl alcohol              | 0.204        | 0.069        | -0.269       | 0.274        | <b>0.606</b> | 0.266        | 0.271        | 0.273    | 0.001        | -0.161       | 0.306        | <b>1</b>     | <b>0.878</b> | 0.415        | 0.035        |
| Total alcohol                    | 0.268        | -0.006       | -0.017       | 0.383        | <b>0.517</b> | <b>0.585</b> | <b>0.566</b> | 0.346    | 0.253        | 0.081        | 0.371        | <b>0.878</b> | <b>1</b>     | 0.259        | 0.024        |
| 3-Hydroxybutanal                 | 0.429        | <b>0.639</b> | -0.212       | <b>0.624</b> | 0.371        | 0.204        | 0.034        | 0.237    | -0.026       | -0.044       | <b>0.584</b> | 0.415        | 0.259        | <b>1</b>     | 0.169        |
| Octanal                          | 0.431        | <b>0.513</b> | -0.025       | 0.426        | -0.150       | 0.323        | 0.242        | -0.172   | -0.347       | -0.222       | <b>0.507</b> | 0.035        | 0.024        | 0.169        | <b>1</b>     |
| Total aldehyde                   | 0.432        | <b>0.512</b> | -0.024       | 0.426        | -0.150       | 0.323        | 0.242        | -0.172   | -0.347       | -0.222       | <b>0.507</b> | 0.035        | 0.024        | 0.169        | <b>1.000</b> |
| Benzaldehyde                     | 0.190        | 0.218        | -0.309       | 0.339        | <b>0.513</b> | 0.306        | 0.299        | 0.232    | -0.004       | -0.147       | 0.298        | <b>0.965</b> | <b>0.853</b> | <b>0.503</b> | 0.065        |
| Myristicin                       | <b>0.548</b> | <b>0.620</b> | 0.211        | <b>0.526</b> | -0.030       | 0.061        | -0.092       | 0.012    | 0.154        | 0.326        | 0.442        | -0.097       | -0.127       | 0.390        | <b>0.460</b> |

|                                         |              |              |              |              |              |              |              |        |              |              |              |              |              |              |               |
|-----------------------------------------|--------------|--------------|--------------|--------------|--------------|--------------|--------------|--------|--------------|--------------|--------------|--------------|--------------|--------------|---------------|
| Benzeneacetaldehyde                     | 0.201        | -0.109       | -0.188       | 0.325        | <b>0.734</b> | <b>0.629</b> | <b>0.618</b> | 0.408  | 0.014        | -0.088       | 0.334        | <b>0.647</b> | <b>0.742</b> | 0.322        | 0.099         |
| Naphthalene                             | <b>0.833</b> | <b>0.699</b> | 0.402        | <b>1.000</b> | 0.376        | 0.430        | 0.125        | 0.319  | 0.316        | 0.358        | <b>0.892</b> | 0.274        | 0.383        | <b>0.624</b> | 0.426         |
| 1,2-Dihydro-1,1,6-trimethyl-naphthalene | <b>0.833</b> | <b>0.699</b> | 0.402        | <b>1.000</b> | 0.376        | 0.430        | 0.125        | 0.319  | 0.316        | 0.358        | <b>0.892</b> | 0.274        | 0.383        | <b>0.624</b> | 0.426         |
| Benzyl alcohol                          | 0.144        | 0.035        | -0.289       | 0.277        | 0.403        | <b>0.696</b> | <b>0.742</b> | 0.269  | -0.025       | -0.158       | 0.338        | <b>0.800</b> | <b>0.871</b> | 0.365        | 0.259         |
| Total benzenoid                         | 0.146        | 0.040        | -0.296       | 0.284        | 0.432        | <b>0.673</b> | <b>0.716</b> | 0.277  | -0.022       | -0.157       | 0.335        | <b>0.825</b> | <b>0.883</b> | 0.380        | 0.236         |
| Ethyl butanoate                         | <b>0.470</b> | -0.020       | 0.287        | 0.320        | -0.032       | <b>0.490</b> | 0.405        | -0.066 | -0.069       | -0.044       | 0.261        | -0.047       | 0.227        | -0.364       | <b>0.456</b>  |
| Ethyl 3-methylbutanoate                 | <b>0.833</b> | <b>0.699</b> | 0.402        | <b>1.000</b> | 0.376        | 0.430        | 0.125        | 0.319  | 0.316        | 0.358        | <b>0.892</b> | 0.274        | 0.383        | <b>0.624</b> | 0.426         |
| 3-Methylbutyl acetate                   | <b>0.833</b> | <b>0.699</b> | 0.402        | <b>1.000</b> | 0.376        | 0.430        | 0.125        | 0.319  | 0.316        | 0.358        | <b>0.892</b> | 0.274        | 0.383        | <b>0.624</b> | 0.426         |
| 3-Hydroxymandelic acid ethyl ester      | 0.116        | 0.114        | -0.351       | 0.150        | 0.354        | 0.016        | -0.003       | 0.010  | -0.352       | -0.274       | 0.021        | 0.132        | 0.054        | 0.181        | 0.282         |
| Ethyl hexanoate                         | 0.101        | 0.044        | <b>0.732</b> | 0.192        | -0.009       | 0.071        | -0.005       | 0.264  | <b>0.772</b> | <b>0.829</b> | 0.214        | -0.118       | 0.050        | -0.171       | -0.047        |
| Hexyl acetate                           | <b>0.543</b> | 0.379        | <b>0.471</b> | <b>0.540</b> | -0.047       | 0.428        | 0.234        | 0.032  | 0.392        | 0.395        | <b>0.621</b> | 0.059        | 0.166        | 0.371        | 0.297         |
| Ethyl (E)-3-hexenoate                   | 0.073        | -0.009       | -0.020       | 0.192        | <b>0.460</b> | -0.022       | -0.104       | 0.365  | 0.260        | 0.238        | -0.017       | 0.102        | 0.153        | 0.256        | <b>-0.542</b> |
| Ethyl lactate                           | <b>0.573</b> | <b>0.526</b> | 0.114        | <b>0.639</b> | 0.270        | 0.292        | 0.152        | 0.236  | 0.153        | 0.131        | <b>0.660</b> | <b>0.536</b> | <b>0.566</b> | 0.425        | <b>0.545</b>  |
| Propyl hexanoate                        | <b>0.833</b> | <b>0.699</b> | 0.402        | <b>1.000</b> | 0.376        | 0.430        | 0.125        | 0.319  | 0.316        | 0.358        | <b>0.892</b> | 0.274        | 0.383        | <b>0.624</b> | 0.426         |
| Ethyl octanoate                         | <b>0.833</b> | <b>0.699</b> | 0.402        | <b>1.000</b> | 0.376        | 0.430        | 0.125        | 0.319  | 0.316        | 0.358        | <b>0.892</b> | 0.274        | 0.383        | <b>0.624</b> | 0.426         |
| Ethyl 3-hydroxybutanoate                | <b>0.700</b> | <b>0.520</b> | 0.158        | <b>0.645</b> | 0.340        | 0.252        | 0.050        | 0.121  | 0.016        | -0.064       | <b>0.651</b> | <b>0.480</b> | 0.411        | 0.442        | <b>0.445</b>  |
| Ethyl nonanoate                         | <b>0.767</b> | <b>0.564</b> | 0.346        | <b>0.891</b> | 0.376        | 0.414        | 0.155        | 0.345  | 0.163        | 0.232        | <b>0.797</b> | 0.349        | 0.437        | <b>0.458</b> | <b>0.531</b>  |
| Isoamyl lactate                         | <b>0.747</b> | <b>0.698</b> | 0.323        | <b>0.883</b> | 0.336        | 0.350        | 0.131        | 0.415  | 0.272        | 0.289        | <b>0.883</b> | 0.410        | <b>0.453</b> | <b>0.577</b> | <b>0.532</b>  |
| Methyl decanoate                        | <b>0.833</b> | <b>0.699</b> | 0.402        | <b>1.000</b> | 0.376        | 0.430        | 0.125        | 0.319  | 0.316        | 0.358        | <b>0.892</b> | 0.274        | 0.383        | <b>0.624</b> | 0.426         |
| Ethyl 2-furancarboxylate                | <b>0.781</b> | <b>0.616</b> | 0.433        | <b>0.943</b> | 0.435        | 0.421        | 0.108        | 0.344  | 0.427        | <b>0.444</b> | <b>0.877</b> | 0.230        | 0.340        | <b>0.642</b> | 0.246         |
| Ethyl decanoate                         | <b>0.833</b> | <b>0.699</b> | 0.402        | <b>1.000</b> | 0.376        | 0.430        | 0.125        | 0.319  | 0.316        | 0.358        | <b>0.892</b> | 0.274        | 0.383        | <b>0.624</b> | 0.426         |
| Diethyl succinate                       | <b>0.833</b> | <b>0.699</b> | 0.402        | <b>1.000</b> | 0.376        | 0.430        | 0.125        | 0.319  | 0.316        | 0.358        | <b>0.892</b> | 0.274        | 0.383        | <b>0.624</b> | 0.426         |
| Ethyl 9-decenoate                       | <b>0.833</b> | <b>0.699</b> | 0.402        | <b>1.000</b> | 0.376        | 0.430        | 0.125        | 0.319  | 0.316        | 0.358        | <b>0.892</b> | 0.274        | 0.383        | <b>0.624</b> | 0.426         |
| Ethyl benzeneacetate                    | <b>0.833</b> | <b>0.699</b> | 0.402        | <b>1.000</b> | 0.376        | 0.430        | 0.125        | 0.319  | 0.316        | 0.358        | <b>0.892</b> | 0.274        | 0.383        | <b>0.624</b> | 0.426         |
| 2-Phenethyl acetate                     | <b>0.833</b> | <b>0.699</b> | 0.402        | <b>1.000</b> | 0.376        | 0.430        | 0.125        | 0.319  | 0.316        | 0.358        | <b>0.892</b> | 0.274        | 0.383        | <b>0.624</b> | 0.426         |
| Ethyl dodecanoate                       | <b>0.833</b> | <b>0.699</b> | 0.402        | <b>1.000</b> | 0.376        | 0.430        | 0.125        | 0.319  | 0.316        | 0.358        | <b>0.892</b> | 0.274        | 0.383        | <b>0.624</b> | 0.426         |
| Total ester                             | 0.120        | 0.113        | -0.347       | 0.157        | 0.368        | 0.017        | -0.005       | 0.023  | -0.339       | -0.262       | 0.021        | 0.134        | 0.060        | 0.187        | 0.261         |
| 3-Hydroxy-2-butanone                    | <b>0.833</b> | <b>0.699</b> | 0.402        | <b>1.000</b> | 0.376        | 0.430        | 0.125        | 0.319  | 0.316        | 0.358        | <b>0.892</b> | 0.274        | 0.383        | <b>0.624</b> | 0.426         |
| Limonene                                | <b>0.716</b> | <b>0.513</b> | <b>0.616</b> | <b>0.901</b> | 0.321        | 0.350        | 0.067        | 0.387  | <b>0.578</b> | <b>0.589</b> | <b>0.781</b> | 0.179        | 0.396        | 0.386        | 0.157         |
| Terpinolene                             | 0.406        | <b>0.838</b> | -0.161       | <b>0.603</b> | 0.390        | -0.071       | -0.263       | -0.043 | -0.091       | -0.121       | <b>0.537</b> | 0.353        | 0.120        | <b>0.704</b> | 0.401         |
| Total terpene                           | <b>0.718</b> | <b>0.493</b> | <b>0.636</b> | <b>0.890</b> | 0.309        | 0.341        | 0.059        | 0.388  | <b>0.585</b> | <b>0.600</b> | <b>0.775</b> | 0.161        | 0.381        | 0.363        | 0.146         |

Values in **bold** indicate significant ( $p < 0.05$ ) correlation

**Table S7** Correlation matrix of quantified phenolic and volatile compounds, physicochemical properties and tested responses of tea-macerated model wines

(continued 5/7)

| Variables                             | Total aldehyde | Benzaldehyde  | Myristicin | Benzeneacetaldehyde | Naphthalene   | 1,2-Dihydro-1,1,6-trimethylnaphthalene | Benzyl alcohol | Total benzeneid | Ethylbutanoate | Ethyl 3-methylbutanoate | 3-Methylbutyl acetate | 3-Hydroxymandelic acid ethyl ester | Ethyl hexanoate | Hexyl acetate | Ethyl (E)-3-hexenoate |
|---------------------------------------|----------------|---------------|------------|---------------------|---------------|----------------------------------------|----------------|-----------------|----------------|-------------------------|-----------------------|------------------------------------|-----------------|---------------|-----------------------|
| TA                                    | -0.322         | -0.430        | -0.415     | -0.373              | <b>-0.956</b> | <b>-0.956</b>                          | -0.362         | -0.370          | -0.340         | <b>-0.956</b>           | <b>-0.956</b>         | -0.022                             | -0.314          | <b>-0.563</b> | -0.218                |
| pH                                    | 0.289          | <b>0.487</b>  | 0.354      | 0.399               | <b>0.901</b>  | <b>0.901</b>                           | 0.424          | 0.432           | 0.346          | <b>0.901</b>            | <b>0.901</b>          | -0.020                             | 0.352           | <b>0.571</b>  | 0.199                 |
| TPC                                   | -0.232         | -0.174        | 0.124      | -0.128              | <b>0.470</b>  | <b>0.470</b>                           | -0.221         | -0.220          | 0.023          | <b>0.470</b>            | <b>0.470</b>          | -0.363                             | <b>0.688</b>    | <b>0.461</b>  | 0.139                 |
| TFC                                   | -0.006         | -0.133        | 0.259      | -0.162              | <b>0.530</b>  | <b>0.530</b>                           | -0.171         | -0.174          | 0.176          | <b>0.530</b>            | <b>0.530</b>          | -0.434                             | <b>0.464</b>    | <b>0.504</b>  | 0.067                 |
| DPPH                                  | -0.220         | -0.195        | 0.119      | -0.118              | <b>0.524</b>  | <b>0.524</b>                           | -0.238         | -0.236          | 0.248          | <b>0.524</b>            | <b>0.524</b>          | -0.269                             | 0.418           | 0.317         | 0.313                 |
| FRAP                                  | -0.312         | -0.303        | 0.099      | -0.221              | 0.411         | 0.411                                  | -0.340         | -0.341          | 0.132          | 0.411                   | 0.411                 | -0.371                             | <b>0.461</b>    | 0.375         | 0.300                 |
| ABTS                                  | -0.267         | -0.265        | 0.081      | -0.195              | 0.424         | 0.424                                  | -0.299         | -0.299          | 0.168          | 0.424                   | 0.424                 | -0.361                             | <b>0.528</b>    | 0.319         | 0.226                 |
| L*                                    | -0.019         | <b>-0.853</b> | -0.153     | <b>-0.461</b>       | <b>-0.571</b> | <b>-0.571</b>                          | <b>-0.601</b>  | <b>-0.628</b>   | 0.211          | <b>-0.571</b>           | <b>-0.571</b>         | 0.009                              | -0.219          | -0.285        | -0.244                |
| a*                                    | -0.094         | <b>0.862</b>  | 0.035      | 0.388               | 0.354         | 0.354                                  | <b>0.585</b>   | <b>0.613</b>    | -0.339         | 0.354                   | 0.354                 | -0.089                             | 0.237           | 0.230         | 0.168                 |
| b*                                    | 0.116          | <b>0.736</b>  | 0.284      | <b>0.468</b>        | <b>0.758</b>  | <b>0.758</b>                           | <b>0.567</b>   | <b>0.587</b>    | -0.051         | <b>0.758</b>            | <b>0.758</b>          | -0.011                             | 0.306           | 0.418         | 0.278                 |
| Quinic acid                           | -0.272         | 0.391         | 0.118      | 0.141               | 0.394         | 0.394                                  | 0.230          | 0.246           | -0.259         | 0.394                   | 0.394                 | -0.224                             | 0.001           | 0.403         | <b>0.527</b>          |
| Gallic acid                           | -0.048         | -0.114        | 0.061      | -0.060              | 0.396         | 0.396                                  | -0.144         | -0.144          | 0.217          | 0.396                   | 0.396                 | -0.250                             | <b>0.714</b>    | 0.255         | -0.133                |
| Chlorogenic acid                      | -0.200         | -0.316        | 0.093      | -0.222              | 0.439         | 0.439                                  | -0.332         | -0.335          | 0.296          | 0.439                   | 0.439                 | -0.356                             | 0.381           | 0.311         | 0.193                 |
| Total phenolic acids                  | -0.223         | 0.100         | 0.129      | 0.007               | <b>0.592</b>  | <b>0.592</b>                           | -0.020         | -0.011          | 0.053          | <b>0.592</b>            | <b>0.592</b>          | -0.370                             | <b>0.595</b>    | <b>0.473</b>  | 0.235                 |
| Gallocatechin                         | -0.181         | 0.051         | 0.147      | 0.004               | <b>0.604</b>  | <b>0.604</b>                           | -0.032         | -0.026          | 0.006          | <b>0.604</b>            | <b>0.604</b>          | -0.373                             | <b>0.557</b>    | <b>0.517</b>  | 0.233                 |
| Epigallocatechin                      | -0.257         | -0.319        | 0.151      | -0.217              | 0.428         | 0.428                                  | -0.337         | -0.340          | 0.122          | 0.428                   | 0.428                 | -0.373                             | <b>0.528</b>    | 0.400         | 0.228                 |
| Procyanidin B1                        | -0.084         | -0.075        | 0.193      | 0.023               | <b>0.661</b>  | <b>0.661</b>                           | -0.086         | -0.086          | 0.275          | <b>0.661</b>            | <b>0.661</b>          | -0.241                             | <b>0.471</b>    | 0.443         | 0.197                 |
| Catechin                              | -0.173         | 0.056         | 0.119      | 0.041               | <b>0.656</b>  | <b>0.656</b>                           | -0.035         | -0.028          | 0.122          | <b>0.656</b>            | <b>0.656</b>          | -0.262                             | 0.419           | <b>0.462</b>  | 0.286                 |
| Procyanidin B2                        | -0.191         | -0.274        | 0.129      | -0.240              | 0.373         | 0.373                                  | -0.290         | -0.295          | 0.060          | 0.373                   | 0.373                 | <b>-0.503</b>                      | <b>0.484</b>    | <b>0.447</b>  | 0.138                 |
| Epicatechin                           | -0.232         | -0.125        | 0.202      | -0.111              | 0.411         | 0.411                                  | -0.107         | -0.110          | -0.036         | 0.411                   | 0.411                 | <b>-0.463</b>                      | 0.434           | <b>0.482</b>  | 0.326                 |
| Epigallocatechin gallate              | -0.273         | 0.102         | 0.012      | -0.049              | <b>0.445</b>  | <b>0.445</b>                           | -0.028         | -0.020          | -0.214         | <b>0.445</b>            | <b>0.445</b>          | -0.421                             | 0.152           | <b>0.528</b>  | 0.355                 |
| Procyanidin B1 3-O-gallate            | -0.265         | 0.113         | 0.069      | 0.001               | <b>0.468</b>  | <b>0.468</b>                           | 0.034          | 0.040           | -0.005         | <b>0.468</b>            | <b>0.468</b>          | <b>-0.464</b>                      | <b>0.490</b>    | 0.421         | 0.298                 |
| Gallocatechin gallate                 | -0.230         | -0.345        | 0.144      | -0.244              | 0.443         | 0.443                                  | -0.362         | -0.365          | 0.173          | 0.443                   | 0.443                 | -0.364                             | 0.418           | 0.388         | 0.238                 |
| Quercetin 3-O-digalactoside/glucoside | -0.190         | -0.186        | 0.207      | -0.166              | 0.329         | 0.329                                  | -0.188         | -0.192          | -0.013         | 0.329                   | 0.329                 | <b>-0.488</b>                      | <b>0.690</b>    | 0.403         | 0.115                 |
| Myricetin 3-O-galactoside 1           | -0.100         | -0.065        | 0.041      | -0.081              | 0.269         | 0.269                                  | -0.126         | -0.123          | 0.165          | 0.269                   | 0.269                 | 0.064                              | 0.200           | 0.055         | 0.101                 |
| Epicatechin                           | -0.101         | 0.049         | 0.212      | 0.062               | <b>0.589</b>  | <b>0.589</b>                           | 0.058          | 0.057           | 0.249          | <b>0.589</b>            | <b>0.589</b>          | -0.336                             | <b>0.450</b>    | 0.443         | 0.241                 |

|                                  |              |              |              |              |              |              |              |              |              |              |              |               |              |              |              |
|----------------------------------|--------------|--------------|--------------|--------------|--------------|--------------|--------------|--------------|--------------|--------------|--------------|---------------|--------------|--------------|--------------|
| gallate                          |              |              |              |              |              |              |              |              |              |              |              |               |              |              |              |
| Rutin                            | -0.363       | 0.123        | 0.152        | 0.159        | <b>0.474</b> | <b>0.474</b> | 0.052        | 0.064        | -0.067       | <b>0.474</b> | <b>0.474</b> | -0.220        | 0.149        | 0.342        | <b>0.651</b> |
| Quercetin 3-O-galactoside        | -0.413       | 0.236        | 0.099        | 0.414        | 0.422        | 0.422        | 0.059        | 0.089        | -0.057       | 0.422        | 0.422        | 0.109         | 0.272        | -0.043       | <b>0.661</b> |
| Kaempferol 3-O-rutinoside 2      | -0.003       | 0.086        | 0.182        | -0.040       | <b>0.528</b> | <b>0.528</b> | 0.100        | 0.094        | 0.242        | <b>0.528</b> | <b>0.528</b> | -0.390        | 0.406        | 0.432        | 0.098        |
| Kaempferol 3-O-glucoside         | -0.308       | 0.212        | 0.149        | 0.171        | 0.440        | 0.440        | 0.135        | 0.147        | -0.136       | 0.440        | 0.440        | -0.220        | 0.057        | 0.319        | <b>0.627</b> |
| Unknown quercetin conjugate      | 0.030        | -0.109       | 0.148        | -0.096       | <b>0.566</b> | <b>0.566</b> | -0.135       | -0.138       | 0.320        | <b>0.566</b> | <b>0.566</b> | -0.221        | <b>0.470</b> | 0.324        | -0.069       |
| Unknown kaempferol conjugate     | -0.159       | -0.101       | 0.168        | -0.048       | <b>0.618</b> | <b>0.618</b> | -0.129       | -0.129       | 0.167        | <b>0.618</b> | <b>0.618</b> | -0.274        | 0.249        | <b>0.458</b> | 0.292        |
| Total flavonoids                 | -0.198       | -0.029       | 0.133        | -0.025       | <b>0.616</b> | <b>0.616</b> | -0.104       | -0.099       | 0.108        | <b>0.616</b> | <b>0.616</b> | -0.318        | <b>0.467</b> | <b>0.472</b> | 0.277        |
| Caffeine                         | -0.230       | -0.328       | 0.098        | -0.247       | 0.361        | 0.361        | -0.337       | -0.341       | 0.101        | 0.361        | 0.361        | <b>-0.449</b> | <b>0.501</b> | 0.387        | 0.157        |
| Ethoxyacetic acid                | <b>0.849</b> | 0.180        | <b>0.480</b> | 0.332        | <b>0.468</b> | <b>0.468</b> | 0.372        | 0.358        | <b>0.606</b> | <b>0.468</b> | <b>0.468</b> | <b>0.448</b>  | -0.080       | 0.178        | -0.152       |
| Acetic acid                      | <b>0.524</b> | 0.279        | <b>0.572</b> | 0.306        | <b>0.910</b> | <b>0.910</b> | 0.252        | 0.256        | 0.176        | <b>0.910</b> | <b>0.910</b> | 0.328         | 0.248        | 0.416        | 0.050        |
| Pterin-6-carboxylic acid         | <b>0.487</b> | 0.196        | 0.185        | 0.173        | <b>0.648</b> | <b>0.648</b> | 0.189        | 0.185        | 0.307        | <b>0.648</b> | <b>0.648</b> | -0.183        | 0.282        | <b>0.713</b> | -0.413       |
| Hexanoic acid                    | 0.039        | <b>0.666</b> | -0.117       | <b>0.636</b> | 0.256        | 0.256        | <b>0.679</b> | <b>0.688</b> | 0.294        | 0.256        | 0.256        | 0.072         | -0.115       | 0.258        | 0.055        |
| Octanoic acid                    | 0.191        | -0.123       | 0.263        | -0.085       | 0.126        | 0.126        | -0.121       | -0.127       | 0.404        | 0.126        | 0.126        | 0.003         | -0.082       | 0.235        | -0.132       |
| Nonanoic acid                    | 0.426        | 0.339        | <b>0.526</b> | 0.325        | <b>1.000</b> | <b>1.000</b> | 0.277        | 0.284        | 0.320        | <b>1.000</b> | <b>1.000</b> | 0.150         | 0.192        | <b>0.540</b> | 0.192        |
| Total acid                       | 0.127        | 0.434        | 0.036        | 0.432        | 0.245        | 0.245        | <b>0.449</b> | <b>0.453</b> | 0.400        | 0.245        | 0.245        | 0.063         | -0.122       | 0.289        | -0.022       |
| 2-Methyl-1-propanol              | 0.353        | 0.313        | 0.136        | 0.304        | <b>0.739</b> | <b>0.739</b> | 0.388        | 0.381        | <b>0.453</b> | <b>0.739</b> | <b>0.739</b> | 0.030         | 0.186        | 0.320        | -0.100       |
| 2-Pentanol                       | 0.426        | 0.339        | <b>0.526</b> | 0.325        | <b>1.000</b> | <b>1.000</b> | 0.277        | 0.284        | 0.320        | <b>1.000</b> | <b>1.000</b> | 0.150         | 0.192        | <b>0.540</b> | 0.192        |
| 1-Butanol                        | 0.426        | 0.339        | <b>0.526</b> | 0.325        | <b>1.000</b> | <b>1.000</b> | 0.277        | 0.284        | 0.320        | <b>1.000</b> | <b>1.000</b> | 0.150         | 0.192        | <b>0.540</b> | 0.192        |
| 2-Hexanol                        | 0.044        | 0.048        | -0.232       | 0.335        | 0.195        | 0.195        | 0.312        | 0.298        | <b>0.654</b> | 0.195        | 0.195        | 0.087         | -0.088       | -0.065       | 0.157        |
| 3-Methyl-1-butanol               | 0.432        | 0.190        | <b>0.548</b> | 0.201        | <b>0.833</b> | <b>0.833</b> | 0.144        | 0.146        | <b>0.470</b> | <b>0.833</b> | <b>0.833</b> | 0.116         | 0.101        | <b>0.543</b> | 0.073        |
| 1-(2-Aminoethylamino)-2-propanol | <b>0.512</b> | 0.218        | <b>0.620</b> | -0.109       | <b>0.699</b> | <b>0.699</b> | 0.035        | 0.040        | -0.020       | <b>0.699</b> | <b>0.699</b> | 0.114         | 0.044        | 0.379        | -0.009       |
| 2-Octen-4-ol                     | -0.024       | -0.309       | 0.211        | -0.188       | 0.402        | 0.402        | -0.289       | -0.296       | 0.287        | 0.402        | 0.402        | -0.351        | <b>0.732</b> | <b>0.471</b> | -0.020       |
| 3-Methyl-1-pentanol              | 0.426        | 0.339        | <b>0.526</b> | 0.325        | <b>1.000</b> | <b>1.000</b> | 0.277        | 0.284        | 0.320        | <b>1.000</b> | <b>1.000</b> | 0.150         | 0.192        | <b>0.540</b> | 0.192        |
| (E)-3-Hexen-1-ol                 | -0.150       | <b>0.513</b> | -0.030       | <b>0.734</b> | 0.376        | 0.376        | 0.403        | 0.432        | -0.032       | 0.376        | 0.376        | 0.354         | -0.009       | -0.047       | <b>0.460</b> |
| 1-Hexanol                        | 0.323        | 0.306        | 0.061        | <b>0.629</b> | 0.430        | 0.430        | <b>0.696</b> | <b>0.673</b> | <b>0.490</b> | 0.430        | 0.430        | 0.016         | 0.071        | 0.428        | -0.022       |
| 2-Methyl-4-heptanol              | 0.242        | 0.299        | -0.092       | <b>0.618</b> | 0.125        | 0.125        | <b>0.742</b> | <b>0.716</b> | 0.405        | 0.125        | 0.125        | -0.003        | -0.005       | 0.234        | -0.104       |
| 2-Ethyl-1-hexanol                | -0.172       | 0.232        | 0.012        | 0.408        | 0.319        | 0.319        | 0.269        | 0.277        | -0.066       | 0.319        | 0.319        | 0.010         | 0.264        | 0.032        | 0.365        |
| Linalool                         | -0.347       | -0.004       | 0.154        | 0.014        | 0.316        | 0.316        | -0.025       | -0.022       | -0.069       | 0.316        | 0.316        | -0.352        | <b>0.772</b> | 0.392        | 0.260        |
| 1-Octanol                        | -0.222       | -0.147       | 0.326        | -0.088       | 0.358        | 0.358        | -0.158       | -0.157       | -0.044       | 0.358        | 0.358        | -0.274        | <b>0.829</b> | 0.395        | 0.238        |
| 2,3-Butanediol                   | <b>0.507</b> | 0.298        | 0.442        | 0.334        | <b>0.892</b> | <b>0.892</b> | 0.338        | 0.335        | 0.261        | <b>0.892</b> | <b>0.892</b> | 0.021         | 0.214        | <b>0.621</b> | -0.017       |

|                                        |               |              |              |              |              |              |              |              |              |              |              |          |          |              |               |
|----------------------------------------|---------------|--------------|--------------|--------------|--------------|--------------|--------------|--------------|--------------|--------------|--------------|----------|----------|--------------|---------------|
| Phenylethyl alcohol                    | 0.035         | <b>0.965</b> | -0.097       | <b>0.647</b> | 0.274        | 0.274        | <b>0.800</b> | <b>0.825</b> | -0.047       | 0.274        | 0.274        | 0.132    | -0.118   | 0.059        | 0.102         |
| Total alcohol                          | 0.024         | <b>0.853</b> | -0.127       | <b>0.742</b> | 0.383        | 0.383        | <b>0.871</b> | <b>0.883</b> | 0.227        | 0.383        | 0.383        | 0.054    | 0.050    | 0.166        | 0.153         |
| 3-Hydroxybutanal                       | 0.169         | <b>0.503</b> | 0.390        | 0.322        | <b>0.624</b> | <b>0.624</b> | 0.365        | 0.380        | -0.364       | <b>0.624</b> | <b>0.624</b> | 0.181    | -0.171   | 0.371        | 0.256         |
| Octanal                                | <b>1.000</b>  | 0.065        | <b>0.460</b> | 0.099        | 0.426        | 0.426        | 0.259        | 0.236        | <b>0.456</b> | 0.426        | 0.426        | 0.282    | -0.047   | 0.297        | <b>-0.542</b> |
| Total aldehyde                         | <b>1</b>      | 0.065        | <b>0.460</b> | 0.099        | 0.426        | 0.426        | 0.259        | 0.236        | <b>0.457</b> | 0.426        | 0.426        | 0.282    | -0.047   | 0.297        | <b>-0.541</b> |
| Benzaldehyde                           | 0.065         | <b>1</b>     | -0.010       | <b>0.605</b> | 0.339        | 0.339        | <b>0.805</b> | <b>0.831</b> | -0.089       | 0.339        | 0.339        | 0.141    | -0.106   | 0.056        | 0.153         |
| Myristicin                             | <b>0.460</b>  | -0.010       | <b>1</b>     | -0.044       | <b>0.526</b> | <b>0.526</b> | -0.034       | -0.036       | 0.037        | <b>0.526</b> | <b>0.526</b> | 0.251    | 0.287    | 0.345        | 0.118         |
| Benzeneacetaldehyde                    | 0.099         | <b>0.605</b> | -0.044       | <b>1</b>     | 0.325        | 0.325        | <b>0.832</b> | <b>0.838</b> | 0.181        | 0.325        | 0.325        | 0.426    | -0.047   | -0.053       | 0.268         |
| Naphthalene                            | 0.426         | 0.339        | <b>0.526</b> | 0.325        | <b>1</b>     | <b>1.000</b> | 0.277        | 0.284        | 0.320        | <b>1.000</b> | <b>1.000</b> | 0.150    | 0.192    | <b>0.540</b> | 0.192         |
| 1,2-Dihydro-1,1,6-trimethylnaphthalene | 0.426         | 0.339        | <b>0.526</b> | 0.325        | <b>1.000</b> | <b>1</b>     | 0.277        | 0.284        | 0.320        | <b>1.000</b> | <b>1.000</b> | 0.150    | 0.192    | <b>0.540</b> | 0.192         |
| Benzyl alcohol                         | 0.259         | <b>0.805</b> | -0.034       | <b>0.832</b> | 0.277        | 0.277        | <b>1</b>     | <b>0.999</b> | 0.134        | 0.277        | 0.277        | 0.199    | -0.080   | 0.087        | -0.005        |
| Total benzenoid                        | 0.236         | <b>0.831</b> | -0.036       | <b>0.838</b> | 0.284        | 0.284        | <b>0.999</b> | <b>1</b>     | 0.115        | 0.284        | 0.284        | 0.207    | -0.083   | 0.075        | 0.023         |
| Ethyl butanoate                        | <b>0.457</b>  | -0.089       | 0.037        | 0.181        | 0.320        | 0.320        | 0.134        | 0.115        | <b>1</b>     | 0.320        | 0.320        | 0.074    | -0.122   | 0.155        | -0.097        |
| Ethyl 3-methylbutanoate                | 0.426         | 0.339        | <b>0.526</b> | 0.325        | <b>1.000</b> | <b>1.000</b> | 0.277        | 0.284        | 0.320        | <b>1</b>     | <b>1.000</b> | 0.150    | 0.192    | <b>0.540</b> | 0.192         |
| 3-Methylbutyl acetate                  | 0.426         | 0.339        | <b>0.526</b> | 0.325        | <b>1.000</b> | <b>1.000</b> | 0.277        | 0.284        | 0.320        | <b>1.000</b> | <b>1</b>     | 0.150    | 0.192    | <b>0.540</b> | 0.192         |
| 3-Hydroxymandelic acid ethyl ester     | 0.282         | 0.141        | 0.251        | 0.426        | 0.150        | 0.150        | 0.199        | 0.207        | 0.074        | 0.150        | 0.150        | <b>1</b> | -0.190   | -0.399       | 0.192         |
| Ethyl hexanoate                        | -0.047        | -0.106       | 0.287        | -0.047       | 0.192        | 0.192        | -0.080       | -0.083       | -0.122       | 0.192        | 0.192        | -0.190   | <b>1</b> | 0.283        | -0.139        |
| Hexyl acetate                          | 0.297         | 0.056        | 0.345        | -0.053       | <b>0.540</b> | <b>0.540</b> | 0.087        | 0.075        | 0.155        | <b>0.540</b> | <b>0.540</b> | -0.399   | 0.283    | <b>1</b>     | -0.196        |
| Ethyl (E)-3-hexenoate                  | <b>-0.541</b> | 0.153        | 0.118        | 0.268        | 0.192        | 0.192        | -0.005       | 0.023        | -0.097       | 0.192        | 0.192        | 0.192    | -0.139   | -0.196       | <b>1</b>      |
| Ethyl lactate                          | <b>0.545</b>  | <b>0.527</b> | 0.378        | 0.361        | <b>0.639</b> | <b>0.639</b> | <b>0.514</b> | <b>0.515</b> | 0.216        | <b>0.639</b> | <b>0.639</b> | 0.219    | 0.141    | 0.352        | -0.097        |
| Propyl hexanoate                       | 0.426         | 0.339        | <b>0.526</b> | 0.325        | <b>1.000</b> | <b>1.000</b> | 0.277        | 0.284        | 0.320        | <b>1.000</b> | <b>1.000</b> | 0.150    | 0.192    | <b>0.540</b> | 0.192         |
| Ethyl octanoate                        | 0.426         | 0.339        | <b>0.526</b> | 0.325        | <b>1.000</b> | <b>1.000</b> | 0.277        | 0.284        | 0.320        | <b>1.000</b> | <b>1.000</b> | 0.150    | 0.192    | <b>0.540</b> | 0.192         |
| Ethyl 3-hydroxybutanoate               | <b>0.445</b>  | <b>0.452</b> | 0.206        | 0.233        | <b>0.645</b> | <b>0.645</b> | 0.288        | 0.298        | 0.343        | <b>0.645</b> | <b>0.645</b> | 0.084    | -0.089   | <b>0.515</b> | -0.047        |
| Ethyl nonanoate                        | <b>0.531</b>  | 0.405        | 0.341        | 0.375        | <b>0.891</b> | <b>0.891</b> | 0.352        | 0.358        | 0.395        | <b>0.891</b> | <b>0.891</b> | 0.198    | 0.213    | 0.369        | 0.029         |
| Isoamyl lactate                        | <b>0.532</b>  | <b>0.459</b> | <b>0.561</b> | 0.353        | <b>0.883</b> | <b>0.883</b> | 0.421        | 0.425        | 0.258        | <b>0.883</b> | <b>0.883</b> | 0.128    | 0.194    | 0.396        | 0.093         |
| Methyl decanoate                       | 0.426         | 0.339        | <b>0.526</b> | 0.325        | <b>1.000</b> | <b>1.000</b> | 0.277        | 0.284        | 0.320        | <b>1.000</b> | <b>1.000</b> | 0.150    | 0.192    | <b>0.540</b> | 0.192         |
| Ethyl 2-furancarboxylate               | 0.246         | 0.277        | <b>0.507</b> | 0.319        | <b>0.943</b> | <b>0.943</b> | 0.220        | 0.228        | 0.244        | <b>0.943</b> | <b>0.943</b> | 0.067    | 0.166    | <b>0.584</b> | 0.372         |
| Ethyl decanoate                        | 0.426         | 0.339        | <b>0.526</b> | 0.325        | <b>1.000</b> | <b>1.000</b> | 0.277        | 0.284        | 0.320        | <b>1.000</b> | <b>1.000</b> | 0.150    | 0.192    | <b>0.540</b> | 0.192         |
| Diethyl succinate                      | 0.426         | 0.339        | <b>0.526</b> | 0.325        | <b>1.000</b> | <b>1.000</b> | 0.277        | 0.284        | 0.320        | <b>1.000</b> | <b>1.000</b> | 0.150    | 0.192    | <b>0.540</b> | 0.192         |
| Ethyl 9-decenoate                      | 0.426         | 0.339        | <b>0.526</b> | 0.325        | <b>1.000</b> | <b>1.000</b> | 0.277        | 0.284        | 0.320        | <b>1.000</b> | <b>1.000</b> | 0.150    | 0.192    | <b>0.540</b> | 0.192         |
| Ethyl benzenoacetate                   | 0.426         | 0.339        | <b>0.526</b> | 0.325        | <b>1.000</b> | <b>1.000</b> | 0.277        | 0.284        | 0.320        | <b>1.000</b> | <b>1.000</b> | 0.150    | 0.192    | <b>0.540</b> | 0.192         |
| 2-Phenethyl                            | 0.426         | 0.339        | <b>0.526</b> | 0.325        | <b>1.000</b> | <b>1.000</b> | 0.277        | 0.284        | 0.320        | <b>1.000</b> | <b>1.000</b> | 0.150    | 0.192    | <b>0.540</b> | 0.192         |

|                      |       |       |              |       |              |              |       |       |        |              |              |              |        |              |       |  |
|----------------------|-------|-------|--------------|-------|--------------|--------------|-------|-------|--------|--------------|--------------|--------------|--------|--------------|-------|--|
| acetate              |       |       |              |       |              |              |       |       |        |              |              |              |        |              |       |  |
| Ethyl dodecanoate    | 0.426 | 0.339 | <b>0.526</b> | 0.325 | <b>1.000</b> | <b>1.000</b> | 0.277 | 0.284 | 0.320  | <b>1.000</b> | <b>1.000</b> | 0.150        | 0.192  | <b>0.540</b> | 0.192 |  |
| Total ester          | 0.261 | 0.146 | 0.254        | 0.433 | 0.157        | 0.157        | 0.197 | 0.206 | 0.074  | 0.157        | 0.157        | <b>0.999</b> | -0.193 | -0.403       | 0.227 |  |
| 3-Hydroxy-2-butanone | 0.426 | 0.339 | <b>0.526</b> | 0.325 | <b>1.000</b> | <b>1.000</b> | 0.277 | 0.284 | 0.320  | <b>1.000</b> | <b>1.000</b> | 0.150        | 0.192  | <b>0.540</b> | 0.192 |  |
| Limonene             | 0.157 | 0.223 | 0.362        | 0.221 | <b>0.901</b> | <b>0.901</b> | 0.153 | 0.161 | 0.354  | <b>0.901</b> | <b>0.901</b> | -0.021       | 0.314  | <b>0.445</b> | 0.305 |  |
| Terpinolene          | 0.400 | 0.430 | <b>0.507</b> | 0.170 | <b>0.603</b> | <b>0.603</b> | 0.163 | 0.184 | -0.177 | <b>0.603</b> | <b>0.603</b> | 0.321        | -0.035 | 0.193        | 0.079 |  |
| Total terpene        | 0.146 | 0.201 | 0.358        | 0.202 | <b>0.890</b> | <b>0.890</b> | 0.133 | 0.140 | 0.365  | <b>0.890</b> | <b>0.890</b> | -0.037       | 0.318  | 0.442        | 0.304 |  |

Values in **bold** indicate significant ( $p < 0.05$ ) correlation.









|                                         |              |              |              |              |              |              |              |              |              |              |              |              |              |              |              |
|-----------------------------------------|--------------|--------------|--------------|--------------|--------------|--------------|--------------|--------------|--------------|--------------|--------------|--------------|--------------|--------------|--------------|
| Benzaldehyde                            | <b>0.527</b> | 0.339        | 0.339        | <b>0.452</b> | 0.405        | <b>0.459</b> | 0.339        | 0.277        | 0.339        | 0.339        | 0.339        | 0.339        | 0.339        | 0.339        | 0.146        |
| Myristicin                              | 0.378        | <b>0.526</b> | <b>0.526</b> | 0.206        | 0.341        | <b>0.561</b> | <b>0.526</b> | <b>0.507</b> | <b>0.526</b> | <b>0.526</b> | <b>0.526</b> | <b>0.526</b> | <b>0.526</b> | <b>0.526</b> | 0.254        |
| Benzeneacetaldehyde                     | 0.361        | 0.325        | 0.325        | 0.233        | 0.375        | 0.353        | 0.325        | 0.319        | 0.325        | 0.325        | 0.325        | 0.325        | 0.325        | 0.325        | 0.433        |
| Naphthalene                             | <b>0.639</b> | <b>1.000</b> | <b>1.000</b> | <b>0.645</b> | <b>0.891</b> | <b>0.883</b> | <b>1.000</b> | <b>0.943</b> | <b>1.000</b> | <b>1.000</b> | <b>1.000</b> | <b>1.000</b> | <b>1.000</b> | <b>1.000</b> | 0.157        |
| 1,2-Dihydro-1,1,6-trimethyl-naphthalene | <b>0.639</b> | <b>1.000</b> | <b>1.000</b> | <b>0.645</b> | <b>0.891</b> | <b>0.883</b> | <b>1.000</b> | <b>0.943</b> | <b>1.000</b> | <b>1.000</b> | <b>1.000</b> | <b>1.000</b> | <b>1.000</b> | <b>1.000</b> | 0.157        |
| Benzyl alcohol                          | <b>0.514</b> | 0.277        | 0.277        | 0.288        | 0.352        | 0.421        | 0.277        | 0.220        | 0.277        | 0.277        | 0.277        | 0.277        | 0.277        | 0.277        | 0.197        |
| Total benzenoid                         | <b>0.515</b> | 0.284        | 0.284        | 0.298        | 0.358        | 0.425        | 0.284        | 0.228        | 0.284        | 0.284        | 0.284        | 0.284        | 0.284        | 0.284        | 0.206        |
| Ethyl butanoate                         | 0.216        | 0.320        | 0.320        | 0.343        | 0.395        | 0.258        | 0.320        | 0.244        | 0.320        | 0.320        | 0.320        | 0.320        | 0.320        | 0.320        | 0.074        |
| Ethyl 3-methylbutanoate                 | <b>0.639</b> | <b>1.000</b> | <b>1.000</b> | <b>0.645</b> | <b>0.891</b> | <b>0.883</b> | <b>1.000</b> | <b>0.943</b> | <b>1.000</b> | <b>1.000</b> | <b>1.000</b> | <b>1.000</b> | <b>1.000</b> | <b>1.000</b> | 0.157        |
| 3-Methylbutyl acetate                   | <b>0.639</b> | <b>1.000</b> | <b>1.000</b> | <b>0.645</b> | <b>0.891</b> | <b>0.883</b> | <b>1.000</b> | <b>0.943</b> | <b>1.000</b> | <b>1.000</b> | <b>1.000</b> | <b>1.000</b> | <b>1.000</b> | <b>1.000</b> | 0.157        |
| 3-Hydroxymandelic acid ethyl ester      | 0.219        | 0.150        | 0.150        | 0.084        | 0.198        | 0.128        | 0.150        | 0.067        | 0.150        | 0.150        | 0.150        | 0.150        | 0.150        | 0.150        | <b>0.999</b> |
| Ethyl hexanoate                         | 0.141        | 0.192        | 0.192        | -0.089       | 0.213        | 0.194        | 0.192        | 0.166        | 0.192        | 0.192        | 0.192        | 0.192        | 0.192        | 0.192        | -            |
| Hexyl acetate                           | 0.352        | <b>0.540</b> | <b>0.540</b> | <b>0.515</b> | 0.369        | 0.396        | <b>0.540</b> | <b>0.584</b> | <b>0.540</b> | <b>0.540</b> | <b>0.540</b> | <b>0.540</b> | <b>0.540</b> | <b>0.540</b> | 0.193        |
| Ethyl (E)-3-hexenoate                   | -0.097       | 0.192        | 0.192        | -0.047       | 0.029        | 0.093        | 0.192        | 0.372        | 0.192        | 0.192        | 0.192        | 0.192        | 0.192        | 0.192        | 0.403        |
| Ethyl lactate                           | <b>1</b>     | <b>0.639</b> | <b>0.639</b> | <b>0.688</b> | <b>0.701</b> | <b>0.770</b> | <b>0.639</b> | <b>0.497</b> | <b>0.639</b> | <b>0.639</b> | <b>0.639</b> | <b>0.639</b> | <b>0.639</b> | <b>0.639</b> | 0.215        |
| Propyl hexanoate                        | <b>0.639</b> | <b>1</b>     | <b>1.000</b> | <b>0.645</b> | <b>0.891</b> | <b>0.883</b> | <b>1.000</b> | <b>0.943</b> | <b>1.000</b> | <b>1.000</b> | <b>1.000</b> | <b>1.000</b> | <b>1.000</b> | <b>1.000</b> | 0.157        |
| Ethyl octanoate                         | <b>0.639</b> | <b>1.000</b> | <b>1</b>     | <b>0.645</b> | <b>0.891</b> | <b>0.883</b> | <b>1.000</b> | <b>0.943</b> | <b>1.000</b> | <b>1.000</b> | <b>1.000</b> | <b>1.000</b> | <b>1.000</b> | <b>1.000</b> | 0.157        |
| Ethyl 3-hydroxybutanoate                | <b>0.688</b> | <b>0.645</b> | <b>0.645</b> | <b>1</b>     | <b>0.676</b> | <b>0.642</b> | <b>0.645</b> | <b>0.587</b> | <b>0.645</b> | <b>0.645</b> | <b>0.645</b> | <b>0.645</b> | <b>0.645</b> | <b>0.645</b> | 0.082        |
| Ethyl nonanoate                         | <b>0.701</b> | <b>0.891</b> | <b>0.891</b> | <b>0.676</b> | <b>1</b>     | <b>0.835</b> | <b>0.891</b> | <b>0.753</b> | <b>0.891</b> | <b>0.891</b> | <b>0.891</b> | <b>0.891</b> | <b>0.891</b> | <b>0.891</b> | 0.199        |
| Isoamyl lactate                         | <b>0.770</b> | <b>0.883</b> | <b>0.883</b> | <b>0.642</b> | <b>0.835</b> | <b>1</b>     | <b>0.883</b> | <b>0.803</b> | <b>0.883</b> | <b>0.883</b> | <b>0.883</b> | <b>0.883</b> | <b>0.883</b> | <b>0.883</b> | 0.132        |
| Methyl decanoate                        | <b>0.639</b> | <b>1.000</b> | <b>1.000</b> | <b>0.645</b> | <b>0.891</b> | <b>0.883</b> | <b>1</b>     | <b>0.943</b> | <b>1.000</b> | <b>1.000</b> | <b>1.000</b> | <b>1.000</b> | <b>1.000</b> | <b>1.000</b> | 0.157        |
| Ethyl 2-furancarboxylate                | <b>0.497</b> | <b>0.943</b> | <b>0.943</b> | <b>0.587</b> | <b>0.753</b> | <b>0.803</b> | <b>0.943</b> | <b>1</b>     | <b>0.943</b> | <b>0.943</b> | <b>0.943</b> | <b>0.943</b> | <b>0.943</b> | <b>0.943</b> | 0.081        |
| Ethyl decanoate                         | <b>0.639</b> | <b>1.000</b> | <b>1.000</b> | <b>0.645</b> | <b>0.891</b> | <b>0.883</b> | <b>1.000</b> | <b>0.943</b> | <b>1</b>     | <b>1.000</b> | <b>1.000</b> | <b>1.000</b> | <b>1.000</b> | <b>1.000</b> | 0.157        |
| Diethyl succinate                       | <b>0.639</b> | <b>1.000</b> | <b>1.000</b> | <b>0.645</b> | <b>0.891</b> | <b>0.883</b> | <b>1.000</b> | <b>0.943</b> | <b>1.000</b> | <b>1</b>     | <b>1.000</b> | <b>1.000</b> | <b>1.000</b> | <b>1.000</b> | 0.157        |
| Ethyl 9-decenoate                       | <b>0.639</b> | <b>1.000</b> | <b>1.000</b> | <b>0.645</b> | <b>0.891</b> | <b>0.883</b> | <b>1.000</b> | <b>0.943</b> | <b>1.000</b> | <b>1.000</b> | <b>1</b>     | <b>1.000</b> | <b>1.000</b> | <b>1.000</b> | 0.157        |
| Ethyl benzeneacetate                    | <b>0.639</b> | <b>1.000</b> | <b>1.000</b> | <b>0.645</b> | <b>0.891</b> | <b>0.883</b> | <b>1.000</b> | <b>0.943</b> | <b>1.000</b> | <b>1.000</b> | <b>1.000</b> | <b>1</b>     | <b>1.000</b> | <b>1.000</b> | 0.157        |
| 2-Phenethyl acetate                     | <b>0.639</b> | <b>1.000</b> | <b>1.000</b> | <b>0.645</b> | <b>0.891</b> | <b>0.883</b> | <b>1.000</b> | <b>0.943</b> | <b>1.000</b> | <b>1.000</b> | <b>1.000</b> | <b>1.000</b> | <b>1</b>     | <b>1.000</b> | 0.157        |

|                      |              |              |              |              |              |              |              |              |              |              |              |              |              |              |          |
|----------------------|--------------|--------------|--------------|--------------|--------------|--------------|--------------|--------------|--------------|--------------|--------------|--------------|--------------|--------------|----------|
| Ethyl dodecanoate    | <b>0.639</b> | <b>1.000</b> | <b>1.000</b> | <b>0.645</b> | <b>0.891</b> | <b>0.883</b> | <b>1.000</b> | <b>0.943</b> | <b>1.000</b> | <b>1.000</b> | <b>1.000</b> | <b>1.000</b> | <b>1.000</b> | <b>1</b>     | 0.157    |
| Total ester          | 0.215        | 0.157        | 0.157        | 0.082        | 0.199        | 0.132        | 0.157        | 0.081        | 0.157        | 0.157        | 0.157        | 0.157        | 0.157        | 0.157        | <b>1</b> |
| 3-Hydroxy-2-butanone | <b>0.639</b> | <b>1.000</b> | <b>1.000</b> | <b>0.645</b> | <b>0.891</b> | <b>0.883</b> | <b>1.000</b> | <b>0.943</b> | <b>1.000</b> | <b>1.000</b> | <b>1.000</b> | <b>1.000</b> | <b>1.000</b> | <b>1.000</b> | 0.157    |
| Limonene             | <b>0.505</b> | <b>0.901</b> | <b>0.901</b> | <b>0.449</b> | <b>0.761</b> | <b>0.781</b> | <b>0.901</b> | <b>0.885</b> | <b>0.901</b> | <b>0.901</b> | <b>0.901</b> | <b>0.901</b> | <b>0.901</b> | <b>0.901</b> | -0.008   |
| Terpinolene          | <b>0.539</b> | <b>0.603</b> | <b>0.603</b> | <b>0.602</b> | <b>0.532</b> | <b>0.637</b> | <b>0.603</b> | <b>0.533</b> | <b>0.603</b> | <b>0.603</b> | <b>0.603</b> | <b>0.603</b> | <b>0.603</b> | <b>0.603</b> | 0.320    |
| Total terpene        | <b>0.483</b> | <b>0.890</b> | <b>0.890</b> | 0.436        | <b>0.748</b> | <b>0.771</b> | <b>0.890</b> | <b>0.880</b> | <b>0.890</b> | <b>0.890</b> | <b>0.890</b> | <b>0.890</b> | <b>0.890</b> | <b>0.890</b> | -0.024   |

---

Values in **bold** indicate significant ( $p < 0.05$ ) correlation

**Table S7** Correlation matrix of quantified phenolic and volatile compounds, physicochemical properties and tested responses of tea-macerated model wines

(continued 7/7)

| Variables                              | 3-Hydroxy-2-butanone | Limonene      | Terpinolene   | Total terpene |
|----------------------------------------|----------------------|---------------|---------------|---------------|
| TA                                     | <b>-0.956</b>        | <b>-0.931</b> | <b>-0.496</b> | <b>-0.922</b> |
| pH                                     | <b>0.901</b>         | <b>0.893</b>  | 0.422         | <b>0.886</b>  |
| TPC                                    | <b>0.470</b>         | <b>0.714</b>  | -0.042        | <b>0.722</b>  |
| TFC                                    | <b>0.530</b>         | <b>0.703</b>  | 0.027         | <b>0.716</b>  |
| DPPH                                   | <b>0.524</b>         | <b>0.821</b>  | -0.084        | <b>0.834</b>  |
| FRAP                                   | 0.411                | <b>0.713</b>  | -0.155        | <b>0.730</b>  |
| ABTS                                   | 0.424                | <b>0.740</b>  | -0.137        | <b>0.756</b>  |
| L*                                     | <b>-0.571</b>        | <b>-0.519</b> | <b>-0.565</b> | <b>-0.497</b> |
| a*                                     | 0.354                | 0.307         | <b>0.458</b>  | 0.286         |
| b*                                     | <b>0.758</b>         | <b>0.711</b>  | <b>0.552</b>  | <b>0.691</b>  |
| Quinic acid                            | 0.394                | <b>0.469</b>  | 0.104         | <b>0.468</b>  |
| Gallic acid                            | 0.396                | <b>0.594</b>  | 0.039         | <b>0.600</b>  |
| Chlorogenic acid                       | 0.439                | <b>0.740</b>  | -0.168        | <b>0.761</b>  |
| Total phenolic acids                   | <b>0.592</b>         | <b>0.828</b>  | 0.068         | <b>0.834</b>  |
| Gallocatechin                          | <b>0.604</b>         | <b>0.808</b>  | 0.121         | <b>0.811</b>  |
| Epigallocatechin                       | 0.428                | <b>0.717</b>  | -0.168        | <b>0.735</b>  |
| Procyanidin B1                         | <b>0.661</b>         | <b>0.885</b>  | 0.042         | <b>0.893</b>  |
| Catechin                               | <b>0.656</b>         | <b>0.864</b>  | 0.144         | <b>0.864</b>  |
| Procyanidin B2                         | 0.373                | <b>0.611</b>  | -0.170        | <b>0.636</b>  |
| Epicatechin                            | 0.411                | <b>0.648</b>  | -0.107        | <b>0.659</b>  |
| Epigallocatechin gallate               | <b>0.445</b>         | <b>0.566</b>  | 0.177         | <b>0.567</b>  |
| Procyanidin B1 3-O-gallate             | <b>0.468</b>         | <b>0.720</b>  | 0.060         | <b>0.727</b>  |
| Gallocatechin gallate                  | 0.443                | <b>0.727</b>  | -0.168        | <b>0.745</b>  |
| Quercetin 3-O-di-galactoside/glucoside | 0.329                | <b>0.553</b>  | -0.051        | <b>0.572</b>  |
| Myricetin 3-O-galactoside 1            | 0.269                | 0.435         | 0.052         | 0.422         |
| Epicatechin gallate                    | <b>0.589</b>         | <b>0.831</b>  | 0.061         | <b>0.840</b>  |
| Rutin                                  | <b>0.474</b>         | <b>0.674</b>  | 0.020         | <b>0.681</b>  |
| Quercetin 3-O-galactoside              | 0.422                | <b>0.567</b>  | 0.254         | <b>0.569</b>  |
| Kaempferol 3-O-rutinoside 2            | <b>0.528</b>         | <b>0.759</b>  | 0.064         | <b>0.764</b>  |

|                                  |              |              |              |              |
|----------------------------------|--------------|--------------|--------------|--------------|
| Kaempferol 3-O-glucoside         | 0.440        | <b>0.598</b> | 0.101        | <b>0.602</b> |
| Unknown quercetin conjugate      | <b>0.566</b> | <b>0.765</b> | 0.054        | <b>0.773</b> |
| Unknown kaempferol conjugate     | <b>0.618</b> | <b>0.830</b> | -0.026       | <b>0.843</b> |
| Total flavonoids                 | <b>0.616</b> | <b>0.847</b> | 0.073        | <b>0.852</b> |
| Caffeine                         | 0.361        | <b>0.632</b> | -0.214       | <b>0.658</b> |
| Ethoxyacetic acid                | <b>0.468</b> | 0.243        | 0.372        | 0.232        |
| Acetic acid                      | <b>0.910</b> | <b>0.760</b> | <b>0.681</b> | <b>0.740</b> |
| Pterin-6-carboxylic acid         | <b>0.648</b> | <b>0.511</b> | 0.393        | <b>0.507</b> |
| Hexanoic acid                    | 0.256        | 0.152        | 0.070        | 0.148        |
| Octanoic acid                    | 0.126        | 0.050        | -0.097       | 0.070        |
| Nonanoic acid                    | <b>1.000</b> | <b>0.901</b> | <b>0.603</b> | <b>0.890</b> |
| Total acid                       | 0.245        | 0.131        | 0.014        | 0.137        |
| 2-Methyl-1-propanol              | <b>0.739</b> | <b>0.769</b> | 0.213        | <b>0.770</b> |
| 2-Pentanol                       | <b>1.000</b> | <b>0.901</b> | <b>0.603</b> | <b>0.890</b> |
| 1-Butanol                        | <b>1.000</b> | <b>0.901</b> | <b>0.603</b> | <b>0.890</b> |
| 2-Hexanol                        | 0.195        | 0.355        | -0.343       | 0.351        |
| 3-Methyl-1-butanol               | <b>0.833</b> | <b>0.716</b> | 0.406        | <b>0.718</b> |
| 1-(2-Aminoethylamino)-2-propanol | <b>0.699</b> | <b>0.513</b> | <b>0.838</b> | <b>0.493</b> |
| 2-Octen-4-ol                     | 0.402        | <b>0.616</b> | -0.161       | <b>0.636</b> |
| 3-Methyl-1-pentanol              | <b>1.000</b> | <b>0.901</b> | <b>0.603</b> | <b>0.890</b> |
| (E)-3-Hexen-1-ol                 | 0.376        | 0.321        | 0.390        | 0.309        |
| 1-Hexanol                        | 0.430        | 0.350        | -0.071       | 0.341        |
| 2-Methyl-4-heptanol              | 0.125        | 0.067        | -0.263       | 0.059        |
| 2-Ethyl-1-hexanol                | 0.319        | 0.387        | -0.043       | 0.388        |
| Linalool                         | 0.316        | <b>0.578</b> | -0.091       | <b>0.585</b> |
| 1-Octanol                        | 0.358        | <b>0.589</b> | -0.121       | <b>0.600</b> |
| 2,3-Butanediol                   | <b>0.892</b> | <b>0.781</b> | <b>0.537</b> | <b>0.775</b> |
| Phenylethyl alcohol              | 0.274        | 0.179        | 0.353        | 0.161        |
| Total alcohol                    | 0.383        | 0.396        | 0.120        | 0.381        |
| 3-Hydroxybutanal                 | <b>0.624</b> | 0.386        | <b>0.704</b> | 0.363        |
| Octanal                          | 0.426        | 0.157        | 0.401        | 0.146        |
| Total aldehyde                   | 0.426        | 0.157        | 0.400        | 0.146        |
| Benzaldehyde                     | 0.339        | 0.223        | 0.430        | 0.201        |
| Myristicin                       | <b>0.526</b> | 0.362        | <b>0.507</b> | 0.358        |
| Benzeneacetaldehyde              | 0.325        | 0.221        | 0.170        | 0.202        |
| Naphthalene                      | <b>1.000</b> | <b>0.901</b> | <b>0.603</b> | <b>0.890</b> |

|                                         |              |              |              |              |
|-----------------------------------------|--------------|--------------|--------------|--------------|
| 1,2-Dihydro-1,1,6-trimethyl-naphthalene | <b>1.000</b> | <b>0.901</b> | <b>0.603</b> | <b>0.890</b> |
| Benzyl alcohol                          | 0.277        | 0.153        | 0.163        | 0.133        |
| Total benzenoid                         | 0.284        | 0.161        | 0.184        | 0.140        |
| Ethyl butanoate                         | 0.320        | 0.354        | -0.177       | 0.365        |
| Ethyl 3-methylbutanoate                 | <b>1.000</b> | <b>0.901</b> | <b>0.603</b> | <b>0.890</b> |
| 3-Methylbutyl acetate                   | <b>1.000</b> | <b>0.901</b> | <b>0.603</b> | <b>0.890</b> |
| 3-Hydroxymandelic acid ethyl ester      | 0.150        | -0.021       | 0.321        | -0.037       |
| Ethyl hexanoate                         | 0.192        | 0.314        | -0.035       | 0.318        |
| Hexyl acetate                           | <b>0.540</b> | <b>0.445</b> | 0.193        | 0.442        |
| Ethyl (E)-3-hexenoate                   | 0.192        | 0.305        | 0.079        | 0.304        |
| Ethyl lactate                           | <b>0.639</b> | <b>0.505</b> | <b>0.539</b> | <b>0.483</b> |
| Propyl hexanoate                        | <b>1.000</b> | <b>0.901</b> | <b>0.603</b> | <b>0.890</b> |
| Ethyl octanoate                         | <b>1.000</b> | <b>0.901</b> | <b>0.603</b> | <b>0.890</b> |
| Ethyl 3-hydroxybutanoate                | <b>0.645</b> | <b>0.449</b> | <b>0.602</b> | 0.436        |
| Ethyl nonanoate                         | <b>0.891</b> | <b>0.761</b> | <b>0.532</b> | <b>0.748</b> |
| Isoamyl lactate                         | <b>0.883</b> | <b>0.781</b> | <b>0.637</b> | <b>0.771</b> |
| Methyl decanoate                        | <b>1.000</b> | <b>0.901</b> | <b>0.603</b> | <b>0.890</b> |
| Ethyl 2-furancarboxylate                | <b>0.943</b> | <b>0.885</b> | <b>0.533</b> | <b>0.880</b> |
| Ethyl decanoate                         | <b>1.000</b> | <b>0.901</b> | <b>0.603</b> | <b>0.890</b> |
| Diethyl succinate                       | <b>1.000</b> | <b>0.901</b> | <b>0.603</b> | <b>0.890</b> |
| Ethyl 9-decenoate                       | <b>1.000</b> | <b>0.901</b> | <b>0.603</b> | <b>0.890</b> |
| Ethyl benzeneacetate                    | <b>1.000</b> | <b>0.901</b> | <b>0.603</b> | <b>0.890</b> |
| 2-Phenethyl acetate                     | <b>1.000</b> | <b>0.901</b> | <b>0.603</b> | <b>0.890</b> |
| Ethyl dodecanoate                       | <b>1.000</b> | <b>0.901</b> | <b>0.603</b> | <b>0.890</b> |
| Total ester                             | 0.157        | -0.008       | 0.320        | -0.024       |
| 3-Hydroxy-2-butanone                    | <b>1</b>     | <b>0.901</b> | <b>0.603</b> | <b>0.890</b> |
| Limonene                                | <b>0.901</b> | <b>1</b>     | 0.340        | <b>0.999</b> |
| Terpinolene                             | <b>0.603</b> | 0.340        | <b>1</b>     | 0.314        |
| Total terpene                           | <b>0.890</b> | <b>0.999</b> | 0.314        | <b>1</b>     |

---

Values in **bold** indicate significant ( $p < 0.05$ ) correlation

**Table S8** PLS-DA results for bottle-aged tea-macerated Chardonnay wines: variables importance in projection (VIP > 1) and standardized coefficient ( $\beta$ )

| PLS-DA (Variables)   | VIP   | $\beta$ |
|----------------------|-------|---------|
| Total benzenoid      | 1.435 | 0.172   |
| Acetic acid          | 0.568 | -0.125  |
| Ethoxyacetic acid    | 1.918 | 0.068   |
| Ethyl lactate        | 1.186 | -0.156  |
| Total ester          | 1.574 | 0.034   |
| Total aldehyde       | 0.528 | -0.042  |
| Total alcohol        | 0.480 | -0.100  |
| 2-Pentanol           | 1.571 | 0.134   |
| Ethyl hexanoate      | 1.429 | 0.065   |
| Benzaldehyde         | 1.503 | -0.079  |
| 2-Methyl-4-heptanol  | 1.566 | 0.104   |
| Ethyl benzeneacetate | 1.482 | -0.083  |
| a*                   | 1.308 | -0.084  |
| Ethyl dodecanoate    | 1.041 | 0.067   |



**Table S9** PLS-DA results for bottle-aged tea-macerated model wines: variables importance in projection (VIP > 1) and standardized coefficient ( $\beta$ )

| PLS-DA (Variables)             | VIP   | $\beta$ |
|--------------------------------|-------|---------|
| Ethyl butanoate                | 2.298 | 0.143   |
| Total aldehyde                 | 1.783 | 0.111   |
| a*                             | 1.613 | -0.100  |
| Total ester                    | 1.409 | 0.088   |
| L*                             | 1.350 | 0.084   |
| 3-Hydroxybutanal               | 1.225 | -0.076  |
| 2-Hexanol                      | 1.172 | 0.073   |
| b*                             | 1.170 | -0.073  |
| Ethyl ( <i>E</i> )-3-hexenoate | 1.143 | -0.071  |
| 2-Ethyl-1-hexanol              | 1.044 | -0.065  |
| Total phenolic acids           | 1.043 | -0.065  |

**Table S10** Odor active values (OAVs) of volatile compounds in tea-macerated Chardonnay wine at different aging times

| Peak No.         | Compound Name              | Odor descriptor*             | Odor threshold (µg/L) | Reference* | C                           |                              |                             |                             |                             |                             |                             |                             |                              |                             |                             |                             |                               |                             |                             |                             |                             |                             |                             |                             |  |  |  |  |
|------------------|----------------------------|------------------------------|-----------------------|------------|-----------------------------|------------------------------|-----------------------------|-----------------------------|-----------------------------|-----------------------------|-----------------------------|-----------------------------|------------------------------|-----------------------------|-----------------------------|-----------------------------|-------------------------------|-----------------------------|-----------------------------|-----------------------------|-----------------------------|-----------------------------|-----------------------------|-----------------------------|--|--|--|--|
|                  |                            |                              |                       |            | 2GC                         |                              |                             |                             | 4GC                         |                             |                             |                             | 1BC                          |                             |                             |                             | 3BC                           |                             |                             |                             |                             |                             |                             |                             |  |  |  |  |
|                  |                            |                              |                       |            | Aging time (month)          |                              |                             |                             |                             |                             |                             |                             |                              |                             |                             |                             |                               |                             |                             |                             |                             |                             |                             |                             |  |  |  |  |
| 1                | 3                          | 6                            | 9                     | 1          | 3                           | 6                            | 9                           | 1                           | 3                           | 6                           | 9                           | 1                           | 3                            | 6                           | 9                           | 1                           | 3                             | 6                           | 9                           | 1                           | 3                           | 6                           | 9                           |                             |  |  |  |  |
| <b>Fruity</b>    |                            |                              |                       |            |                             |                              |                             |                             |                             |                             |                             |                             |                              |                             |                             |                             |                               |                             |                             |                             |                             |                             |                             |                             |  |  |  |  |
| 1                | Ethyl butanoate***         | Sweet, fruity, juicy         | 20                    | (4)        | 13.804 ± 1.441 <sup>a</sup> | 11.816 ± 3.224 <sup>b</sup>  | 10.766 ± 1.100 <sup>c</sup> | 8.410 ± 0.572 <sup>d</sup>  | 13.419 ± 0.480 <sup>e</sup> | 10.182 ± 1.178 <sup>f</sup> | 12.325 ± 1.068 <sup>g</sup> | 8.345 ± 0.741 <sup>h</sup>  | 14.995 ± 1.054 <sup>i</sup>  | 13.199 ± 0.841 <sup>j</sup> | 12.696 ± 0.837 <sup>k</sup> | 8.723 ± 0.754 <sup>l</sup>  | 14.352 ± 0.585 <sup>m</sup>   | 11.707 ± 0.412 <sup>n</sup> | 11.810 ± 1.699 <sup>o</sup> | 8.109 ± 0.493 <sup>p</sup>  | 16.237 ± 0.610 <sup>q</sup> | 11.729 ± 2.259 <sup>r</sup> | 8.951 ± 0.866 <sup>s</sup>  | 9.234 ± 1.024 <sup>t</sup>  |  |  |  |  |
| 2                | Ethyl 3-methylbutanoate*** | Sweet, estery, fruity        | 3                     | (4)        | 33.138 ± 0.435 <sup>a</sup> | 34.038 ± 0.000 <sup>b</sup>  | 33.041 ± 0.463 <sup>c</sup> | 31.593 ± 0.151 <sup>d</sup> | 32.833 ± 0.096 <sup>e</sup> | 32.508 ± 0.488 <sup>f</sup> | 33.291 ± 0.224 <sup>g</sup> | 31.429 ± 0.309 <sup>h</sup> | 33.123 ± 0.242 <sup>i</sup>  | 32.769 ± 0.180 <sup>j</sup> | 33.158 ± 0.180 <sup>k</sup> | 31.774 ± 0.288 <sup>l</sup> | 33.170 ± 0.314 <sup>m</sup>   | 32.712 ± 0.170 <sup>n</sup> | 33.434 ± 0.562 <sup>o</sup> | 31.482 ± 0.097 <sup>p</sup> | 33.530 ± 0.773 <sup>q</sup> | 32.698 ± 4.105 <sup>r</sup> | 32.499 ± 1.024 <sup>s</sup> | 32.420 ± 0.574 <sup>t</sup> |  |  |  |  |
| 4                | 3-Methylbutyl acetate***   | Sweet, banana, fruity        | 30                    | (4)        | 19.782 ± 3.585 <sup>a</sup> | 10.203 ± 6.195 <sup>b</sup>  | 3.621 ± 0.720 <sup>c</sup>  | 1.847 ± 0.261 <sup>d</sup>  | 18.738 ± 1.218 <sup>e</sup> | 7.078 ± 1.279 <sup>f</sup>  | 4.971 ± 0.720 <sup>g</sup>  | 2.100 ± 0.459 <sup>h</sup>  | 22.675 ± 2.749 <sup>i</sup>  | 11.846 ± 1.281 <sup>j</sup> | 11.846 ± 0.551 <sup>k</sup> | 3.014 ± 0.604 <sup>l</sup>  | 20.497 ± 1.860 <sup>m</sup>   | 9.318 ± 1.028 <sup>n</sup>  | 5.058 ± 1.679 <sup>o</sup>  | 1.720 ± 0.272 <sup>p</sup>  | 23.335 ± 1.607 <sup>q</sup> | 10.200 ± 4.105 <sup>r</sup> | 3.295 ± 1.024 <sup>s</sup>  | 3.279 ± 0.912 <sup>t</sup>  |  |  |  |  |
| 11               | Ethyl hexanoate***         | Sweet, fruity, pineapple     | 5                     | (4)        | 51.223 ± 7.535 <sup>a</sup> | 47.904 ± 15.527 <sup>b</sup> | 49.494 ± 9.280 <sup>c</sup> | 36.460 ± 0.000 <sup>d</sup> | 41.251 ± 2.266 <sup>e</sup> | 34.399 ± 4.762 <sup>f</sup> | 47.997 ± 5.228 <sup>g</sup> | 30.129 ± 5.390 <sup>h</sup> | 41.597 ± 4.483 <sup>i</sup>  | 41.151 ± 1.281 <sup>j</sup> | 43.769 ± 3.868 <sup>k</sup> | 27.422 ± 3.200 <sup>l</sup> | 47.560 ± 3.879 <sup>m</sup>   | 42.546 ± 2.294 <sup>n</sup> | 47.309 ± 8.501 <sup>o</sup> | 27.410 ± 3.735 <sup>p</sup> | 50.073 ± 2.914 <sup>q</sup> | 35.886 ± 8.651 <sup>r</sup> | 25.359 ± 1.024 <sup>s</sup> | 27.501 ± 4.456 <sup>t</sup> |  |  |  |  |
| 14               | Hexyl acetate              | Fruity, green, apple         | 63                    | (7)        | 0.404 ± 0.069 <sup>a</sup>  | 0.207 ± 0.113 <sup>b</sup>   | 0.064 ± 0.013 <sup>c</sup>  | 0.029 ± 0.004 <sup>d</sup>  | 0.314 ± 0.022 <sup>e</sup>  | 0.108 ± 0.017 <sup>f</sup>  | 0.072 ± 0.003 <sup>g</sup>  | 0.037 ± 0.008 <sup>h</sup>  | 0.321 ± 0.037 <sup>i</sup>   | 0.158 ± 0.028 <sup>j</sup>  | 0.085 ± 0.019 <sup>k</sup>  | 0.046 ± 0.004 <sup>l</sup>  | 0.353 ± 0.031 <sup>m</sup>    | 0.153 ± 0.015 <sup>n</sup>  | 0.076 ± 0.016 <sup>o</sup>  | 0.027 ± 0.006 <sup>p</sup>  | 0.318 ± 0.011 <sup>q</sup>  | 0.052 ± 0.011 <sup>r</sup>  | 0.058 ± 0.016 <sup>s</sup>  | 0.048 ± 0.011 <sup>t</sup>  |  |  |  |  |
| 18               | Ethyl (E)-3-hexenoate      | Green, fruity, passion fruit | --                    | --         | --                          | --                           | --                          | --                          | --                          | --                          | --                          | --                          | --                           | --                          | --                          | --                          | --                            | --                          | --                          | --                          | --                          | --                          | --                          | --                          |  |  |  |  |
| 20               | 2-Octen-4-ol               | Fruity, berry                | --                    | --         | --                          | --                           | --                          | --                          | --                          | --                          | --                          | --                          | --                           | --                          | --                          | --                          | --                            | --                          | --                          | --                          | --                          | --                          | --                          | --                          |  |  |  |  |
| 22               | Ethyl lactate              | Sweet, fruity, acidic        | 14000                 | (4)        | 0.010 ± 0.001 <sup>a</sup>  | 0.015 ± 0.001 <sup>b</sup>   | 0.016 ± 0.003 <sup>c</sup>  | 0.011 ± 0.001 <sup>d</sup>  | 0.010 ± 0.001 <sup>e</sup>  | 0.014 ± 0.000 <sup>f</sup>  | 0.014 ± 0.000 <sup>g</sup>  | 0.012 ± 0.002 <sup>h</sup>  | 0.011 ± 0.001 <sup>i</sup>   | 0.014 ± 0.000 <sup>j</sup>  | 0.014 ± 0.000 <sup>k</sup>  | 0.011 ± 0.000 <sup>l</sup>  | 0.010 ± 0.001 <sup>m</sup>    | 0.015 ± 0.001 <sup>n</sup>  | 0.015 ± 0.001 <sup>o</sup>  | 0.012 ± 0.000 <sup>p</sup>  | 0.011 ± 0.000 <sup>q</sup>  | 0.012 ± 0.000 <sup>r</sup>  | 0.013 ± 0.001 <sup>s</sup>  | 0.013 ± 0.001 <sup>t</sup>  |  |  |  |  |
| 23               | Propyl hexanoate           | Sweet, fruity, juicy         | 15                    | (3)        | 0.428 ± 0.091 <sup>a</sup>  | 0.553 ± 0.154 <sup>b</sup>   | 0.545 ± 0.121 <sup>c</sup>  | 0.199 ± 0.078 <sup>d</sup>  | 0.315 ± 0.037 <sup>e</sup>  | 0.401 ± 0.052 <sup>f</sup>  | 0.534 ± 0.076 <sup>g</sup>  | 0.122 ± 0.051 <sup>h</sup>  | 0.279 ± 0.050 <sup>i</sup>   | 0.477 ± 0.068 <sup>j</sup>  | 0.540 ± 0.081 <sup>k</sup>  | 0.102 ± 0.031 <sup>l</sup>  | 0.354 ± 0.047 <sup>m</sup>    | 0.412 ± 0.035 <sup>n</sup>  | 0.491 ± 0.112 <sup>o</sup>  | 0.087 ± 0.047 <sup>p</sup>  | 0.376 ± 0.028 <sup>q</sup>  | 0.357 ± 0.133 <sup>r</sup>  | 0.222 ± 0.043 <sup>s</sup>  | 0.009 ± 0.000 <sup>t</sup>  |  |  |  |  |
| 31               | Benzaldehyde               | Strong, sharp, sweet         | 2000                  | (4)        | 0.004 ± 0.000 <sup>a</sup>  | 0.007 ± 0.001 <sup>b</sup>   | 0.010 ± 0.002 <sup>c</sup>  | 0.011 ± 0.001 <sup>d</sup>  | 0.002 ± 0.002 <sup>e</sup>  | 0.010 ± 0.001 <sup>f</sup>  | 0.014 ± 0.001 <sup>g</sup>  | 0.004 ± 0.004 <sup>h</sup>  | 0.014 ± 0.002 <sup>i</sup>   | 0.014 ± 0.008 <sup>j</sup>  | 0.013 ± 0.006 <sup>k</sup>  | 0.007 ± 0.000 <sup>l</sup>  | 0.010 ± 0.000 <sup>m</sup>    | 0.028 ± 0.002 <sup>n</sup>  | 0.047 ± 0.006 <sup>o</sup>  | 0.009 ± 0.000 <sup>p</sup>  | 0.013 ± 0.001 <sup>q</sup>  | 0.020 ± 0.003 <sup>r</sup>  | 0.022 ± 0.003 <sup>s</sup>  | 0.022 ± 0.002 <sup>t</sup>  |  |  |  |  |
| 33               | Ethyl 3-hydroxybutanoate   | Fruity, green, grape         | --                    | --         | --                          | --                           | --                          | --                          | --                          | --                          | --                          | --                          | --                           | --                          | --                          | --                          | --                            | --                          | --                          | --                          | --                          | --                          | --                          | --                          |  |  |  |  |
| 37               | Isoamyl lactate            | Fruity, creamy, nutty        | 200                   | (2)        | --                          | 0.084 ± 0.000 <sup>a</sup>   | <0.001 <sup>b</sup>         | 0.046 ± 0.009 <sup>c</sup>  | 0.063 ± 0.003 <sup>d</sup>  | 0.137 ± 0.009 <sup>e</sup>  | 0.126 ± 0.013 <sup>f</sup>  | 0.077 ± 0.006 <sup>g</sup>  | 0.065 ± 0.015 <sup>h</sup>   | 0.137 ± 0.023 <sup>i</sup>  | 0.121 ± 0.007 <sup>j</sup>  | 0.077 ± 0.010 <sup>k</sup>  | 0.053 ± 0.008 <sup>l</sup>    | 0.127 ± 0.030 <sup>m</sup>  | 0.104 ± 0.034 <sup>n</sup>  | 0.081 ± 0.005 <sup>o</sup>  | 0.066 ± 0.012 <sup>p</sup>  | 0.117 ± 0.024 <sup>q</sup>  | 0.123 ± 0.017 <sup>r</sup>  | 0.115 ± 0.027 <sup>s</sup>  |  |  |  |  |
| 42               | Ethyl decanoate***         | Sweet, waxy, fruity          | 200                   | (4)        | 1.603 ± 0.158 <sup>a</sup>  | 1.576 ± 0.267 <sup>b</sup>   | 0.916 ± 0.064 <sup>c</sup>  | 0.676 ± 0.051 <sup>d</sup>  | 0.883 ± 0.544 <sup>e</sup>  | 0.569 ± 0.030 <sup>f</sup>  | 0.458 ± 0.003 <sup>g</sup>  | 0.454 ± 0.023 <sup>h</sup>  | 0.503 ± 0.018 <sup>i</sup>   | 0.522 ± 0.006 <sup>j</sup>  | 0.443 ± 0.000 <sup>k</sup>  | 0.424 ± 0.000 <sup>l</sup>  | 0.687 ± 0.005 <sup>m</sup>    | 0.657 ± 0.010 <sup>n</sup>  | 0.517 ± 0.018 <sup>o</sup>  | 0.459 ± 0.002 <sup>p</sup>  | 0.503 ± 0.002 <sup>q</sup>  | 0.497 ± 0.026 <sup>r</sup>  | 0.435 ± 0.008 <sup>s</sup>  | 0.409 ± 0.005 <sup>t</sup>  |  |  |  |  |
| 43               | Diethyl succinate          | Fruity, apple, cooked apple  | 200000                | (4)        | 0.007 ± 0.000 <sup>a</sup>  | 0.010 ± 0.001 <sup>b</sup>   | 0.014 ± 0.003 <sup>c</sup>  | 0.011 ± 0.000 <sup>d</sup>  | 0.004 ± 0.003 <sup>e</sup>  | 0.009 ± 0.001 <sup>f</sup>  | 0.011 ± 0.000 <sup>g</sup>  | 0.011 ± 0.002 <sup>h</sup>  | 0.006 ± 0.000 <sup>i</sup>   | 0.008 ± 0.001 <sup>j</sup>  | 0.011 ± 0.001 <sup>k</sup>  | 0.010 ± 0.001 <sup>l</sup>  | 0.007 ± 0.000 <sup>m</sup>    | 0.009 ± 0.001 <sup>n</sup>  | 0.012 ± 0.001 <sup>o</sup>  | 0.011 ± 0.001 <sup>p</sup>  | 0.007 ± 0.000 <sup>q</sup>  | 0.008 ± 0.000 <sup>r</sup>  | 0.010 ± 0.001 <sup>s</sup>  | 0.011 ± 0.001 <sup>t</sup>  |  |  |  |  |
| 44               | Ethyl 9-decenoate***       | Fruity, fatty                | 76.20                 | (4)        | 5.149 ± 0.530 <sup>a</sup>  | 8.398 ± 1.678 <sup>b</sup>   | 5.642 ± 0.000 <sup>c</sup>  | <0.001 <sup>d</sup>         | <0.001 <sup>e</sup>         | <0.001 <sup>f</sup>         | <0.001 <sup>g</sup>         | <0.001 <sup>h</sup>         | <0.001 <sup>i</sup>          | <0.001 <sup>j</sup>         | <0.001 <sup>k</sup>         | <0.001 <sup>l</sup>         | <0.001 <sup>m</sup>           | 0.368 ± 0.000 <sup>n</sup>  | <0.001 <sup>o</sup>         | <0.001 <sup>p</sup>         | <0.001 <sup>q</sup>         | <0.001 <sup>r</sup>         | <0.001 <sup>s</sup>         | <0.001 <sup>t</sup>         |  |  |  |  |
| <b>Floral</b>    |                            |                              |                       |            |                             |                              |                             |                             |                             |                             |                             |                             |                              |                             |                             |                             |                               |                             |                             |                             |                             |                             |                             |                             |  |  |  |  |
| 35               | Linalool***                | Citrus, floral, sweet        | 25                    | (4)        | 0.340 ± 0.244 <sup>a</sup>  | 0.402 ± 0.00 <sup>b</sup>    | 0.424 ± 0.119 <sup>c</sup>  | <0.001 <sup>d</sup>         | 5.560 ± 3.855 <sup>e</sup>  | 11.784 ± 0.970 <sup>f</sup> | 10.476 ± 0.698 <sup>g</sup> | 8.693 ± 1.156 <sup>h</sup>  | 12.722 ± 1.050 <sup>i</sup>  | 17.137 ± 0.307 <sup>j</sup> | 23.430 ± 3.358 <sup>k</sup> | 17.971 ± 1.631 <sup>l</sup> | 2.785 ± 0.213 <sup>m</sup>    | 2.975 ± 0.223 <sup>n</sup>  | 2.598 ± 0.169 <sup>o</sup>  | 1.432 ± 0.068 <sup>p</sup>  | 6.846 ± 0.459 <sup>q</sup>  | 6.577 ± 0.068 <sup>r</sup>  | 7.114 ± 0.406 <sup>s</sup>  | 5.264 ± 0.441 <sup>t</sup>  |  |  |  |  |
| 47               | Ethyl benzeneacetate       | Sweet, floral, honey         | 650                   | (4)        | 0.003 ± 0.000 <sup>a</sup>  | 0.003 ± 0.000 <sup>b</sup>   | 0.005 ± 0.001 <sup>c</sup>  | 0.003 ± 0.000 <sup>d</sup>  | 0.007 ± 0.000 <sup>e</sup>  | 0.014 ± 0.001 <sup>f</sup>  | 0.024 ± 0.001 <sup>g</sup>  | 0.031 ± 0.004 <sup>h</sup>  | 0.009 ± 0.001 <sup>i</sup>   | 0.017 ± 0.001 <sup>j</sup>  | 0.038 ± 0.005 <sup>k</sup>  | 0.037 ± 0.004 <sup>l</sup>  | 0.007 ± 0.001 <sup>m</sup>    | 0.013 ± 0.001 <sup>n</sup>  | 0.023 ± 0.002 <sup>o</sup>  | 0.020 ± 0.002 <sup>p</sup>  | 0.015 ± 0.001 <sup>q</sup>  | 0.020 ± 0.001 <sup>r</sup>  | 0.038 ± 0.004 <sup>s</sup>  | 0.046 ± 0.005 <sup>t</sup>  |  |  |  |  |
| 48               | 2-Phenethyl acetate        | Floral, rose, sweet          | 650                   | (4)        | 0.060 ± 0.000 <sup>a</sup>  | 0.059 ± 0.000 <sup>b</sup>   | 0.057 ± 0.000 <sup>c</sup>  | 0.057 ± 0.000 <sup>d</sup>  | 0.049 ± 0.017 <sup>e</sup>  | 0.058 ± 0.000 <sup>f</sup>  | 0.057 ± 0.000 <sup>g</sup>  | 0.057 ± 0.000 <sup>h</sup>  | 0.059 ± 0.000 <sup>i</sup>   | 0.058 ± 0.000 <sup>j</sup>  | 0.057 ± 0.000 <sup>k</sup>  | 0.057 ± 0.000 <sup>l</sup>  | 0.057 ± 0.000 <sup>m</sup>    | 0.058 ± 0.000 <sup>n</sup>  | 0.058 ± 0.000 <sup>o</sup>  | 0.057 ± 0.000 <sup>p</sup>  | 0.059 ± 0.000 <sup>q</sup>  | 0.058 ± 0.000 <sup>r</sup>  | 0.058 ± 0.000 <sup>s</sup>  | 0.057 ± 0.000 <sup>t</sup>  |  |  |  |  |
| 51               | Benzyl alcohol             | Floral, rose, phenolic       | 200000                | (4)        | 0.003 ± 0.000 <sup>a</sup>  | <0.001 <sup>b</sup>          | 0.001 ± 0.000 <sup>c</sup>  | 0.003 ± 0.001 <sup>d</sup>  | 0.003 ± 0.000 <sup>e</sup>  | 0.002 ± 0.000 <sup>f</sup>  | 0.001 ± 0.000 <sup>g</sup>  | 0.002 ± 0.000 <sup>h</sup>  | 0.003 ± 0.000 <sup>i</sup>   | 0.002 ± 0.000 <sup>j</sup>  | 0.002 ± 0.000 <sup>k</sup>  | 0.002 ± 0.000 <sup>l</sup>  | 0.003 ± 0.000 <sup>m</sup>    | 0.002 ± 0.000 <sup>n</sup>  | 0.002 ± 0.000 <sup>o</sup>  | 0.002 ± 0.000 <sup>p</sup>  | 0.004 ± 0.000 <sup>q</sup>  | 0.002 ± 0.000 <sup>r</sup>  | 0.002 ± 0.000 <sup>s</sup>  | 0.002 ± 0.000 <sup>t</sup>  |  |  |  |  |
| 52               | Phenylethyl alcohol***     | Sweet, floral, fresh         | 28922.73              | (8)        | 0.951 ± 0.070 <sup>a</sup>  | 1.061 ± 0.090 <sup>b</sup>   | 1.297 ± 0.270 <sup>c</sup>  | 0.869 ± 0.034 <sup>d</sup>  | 0.792 ± 0.054 <sup>e</sup>  | 0.954 ± 0.035 <sup>f</sup>  | 1.091 ± 0.055 <sup>g</sup>  | 0.948 ± 0.132 <sup>h</sup>  | 0.808 ± 0.044 <sup>i</sup>   | 0.960 ± 0.056 <sup>j</sup>  | 1.141 ± 0.149 <sup>k</sup>  | 0.852 ± 0.057 <sup>l</sup>  | 0.856 ± 0.049 <sup>m</sup>    | 1.070 ± 0.008 <sup>n</sup>  | 1.168 ± 0.075 <sup>o</sup>  | 0.927 ± 0.080 <sup>p</sup>  | 0.944 ± 0.041 <sup>q</sup>  | 1.003 ± 0.044 <sup>r</sup>  | 1.104 ± 0.119 <sup>s</sup>  | 0.996 ± 0.092 <sup>t</sup>  |  |  |  |  |
| <b>Fermented</b> |                            |                              |                       |            |                             |                              |                             |                             |                             |                             |                             |                             |                              |                             |                             |                             |                               |                             |                             |                             |                             |                             |                             |                             |  |  |  |  |
| 5                | 2-Pentanol***              | Mild, green, fusel           | 11                    | (7)        | --                          | <0.001 <sup>a</sup>          | <0.001 <sup>b</sup>         | --                          | 64.683 ± 0.000 <sup>c</sup> | <0.001 <sup>d</sup>         | <0.001 <sup>e</sup>         | <0.001 <sup>f</sup>         | 115.980 ± 1.884 <sup>g</sup> | <0.001 <sup>h</sup>         | <0.001 <sup>i</sup>         | <0.001 <sup>j</sup>         | 100.495 ± 14.096 <sup>k</sup> | <0.001 <sup>l</sup>         | <0.001 <sup>m</sup>         | <0.001 <sup>n</sup>         | <0.001 <sup>o</sup>         | <0.001 <sup>p</sup>         | <0.001 <sup>q</sup>         | <0.001 <sup>r</sup>         |  |  |  |  |
| 6                | 1-Butanol                  | Fusel, oil, sweet            | 150000                | (4)        | 0.005 ± 0.001 <sup>a</sup>  | <0.001 <sup>b</sup>          | 0.006 ± 0.001 <sup>c</sup>  | 0.003 ± 0.001 <sup>d</sup>  | 0.006 ± 0.001 <sup>e</sup>  | <0.001 <sup>f</sup>         | 0.007 ± 0.001 <sup>g</sup>  | 0.004 ± 0.001 <sup>h</sup>  | 0.010 ± 0.001 <sup>i</sup>   | 0.059 ± 0.000 <sup>j</sup>  | 0.009 ± 0.000 <sup>k</sup>  | 0.005 ± 0.001 <sup>l</sup>  | 0.007 ± 0.001 <sup>m</sup>    | 0.023 ± 0.004 <sup>n</sup>  | 0.007 ± 0.000 <sup>o</sup>  | 0.004 ± 0.001 <sup>p</sup>  | <0.001 <sup>q</sup>         | 0.009 ± 0.001 <sup>r</sup>  | 0.005 ± 0.001 <sup>s</sup>  | 0.005 ± 0.000 <sup>t</sup>  |  |  |  |  |
| 10               | 3-Methyl-1-butanol***      | Fusel, oily, alcoholic       | 30000                 | (4)        | 2.061 ± 0.145 <sup>a</sup>  | 2.246 ± 0.129 <sup>b</sup>   | 2.693 ± 0.516 <sup>c</sup>  | 2.002 ± 0.000 <sup>d</sup>  | 1.993 ± 0.105 <sup>e</sup>  | 2.299 ± 0.073 <sup>f</sup>  | 2.424 ± 0.126 <sup>g</sup>  | 2.177 ± 0.264 <sup>h</sup>  | 2.173 ± 0.121 <sup>i</sup>   | 2.424 ± 0.130 <sup>j</sup>  | 2.746 ± 0.323 <sup>k</sup>  | 2.080 ± 0.128 <sup>l</sup>  | 2.008 ± 0.085 <sup>m</sup>    | 2.434 ± 0.128 <sup>n</sup>  | 2.618 ± 0.083 <sup>o</sup>  | 1.994 ± 0.087 <sup>p</sup>  | 2.326 ± 0.091 <sup>q</sup>  | 2.277 ± 0.038 <sup>r</sup>  | 2.423 ± 0.180 <sup>s</sup>  | 2.319 ± 0.231 <sup>t</sup>  |  |  |  |  |
| 21               | 3-Methyl-1-pentanol        | Fusel, cognac, wine          | 1000                  | (4)        | 0.020 ± 0.003 <sup>a</sup>  | 0.025 ± 0.002 <sup>b</sup>   | 0.035 ± 0.008 <sup>c</sup>  | 0.016 ± 0.001 <sup>d</sup>  | 0.020 ± 0.001 <sup>e</sup>  | 0.024 ± 0.001 <sup>f</sup>  | 0.031 ± 0.002 <sup>g</sup>  | 0.018 ± 0.002 <sup>h</sup>  | 0.019 ± 0.002 <sup>i</sup>   | 0.035 ± 0.004 <sup>j</sup>  | 0.017 ± 0.001 <sup>k</sup>  | 0.021 ± 0.001 <sup>l</sup>  | 0.027 ± 0.001 <sup>m</sup>    | 0.036 ± 0.003 <sup>n</sup>  | 0.018 ± 0.001 <sup>o</sup>  | 0.028 ± 0.001 <sup>p</sup>  | 0.030 ± 0.001 <sup>q</sup>  | 0.030 ± 0.003 <sup>r</sup>  | 0.035 ± 0.004 <sup>s</sup>  | 0.023 ± 0.003 <sup>t</sup>  |  |  |  |  |
| 39               | Methyl decanoate           | Oily, wine, fruity           | 1200                  | (4)        | 0.063 ± 0.000 <sup>a</sup>  | 0.063 ± 0.000 <sup>b</sup>   | 0.061 ± 0.000 <sup>c</sup>  | 0.060 ± 0.000 <sup>d</sup>  | 0.047 ± 0.023 <sup>e</sup>  | 0.060 ± 0.000 <sup>f</sup>  | <0.001 <sup>g</sup>         | 0.060 ± 0.000 <sup>h</sup>  | 0.060 ± 0.000 <sup>i</sup>   | 0.060 ± 0.000 <sup>j</sup>  | 0.060 ± 0.000 <sup>k</sup>  | <0.001 <sup>l</sup>         | 0.061 ± 0.000 <sup>m</sup>    | 0.061 ± 0.000 <sup>n</sup>  | 0.060 ± 0.000 <sup>o</sup>  | 0.060 ± 0.000 <sup>p</sup>  | 0.060 ± 0.000 <sup>q</sup>  | 0.060 ± 0.000 <sup>r</sup>  | 0.060 ± 0.000 <sup>s</sup>  | 0.060 ± 0.000 <sup>t</sup>  |  |  |  |  |
| <b>Waxy</b>      |                            |                              |                       |            |                             |                              |                             |                             |                             |                             |                             |                             |                              |                             |                             |                             |                               |                             |                             |                             |                             |                             |                             |                             |  |  |  |  |

|                  |                          |                           |        |     |                                |                                |                                |                               |                               |                               |                               |                               |                               |                              |                               |                               |                               |                                |                               |                               |                               |                                  |                               |                               |        |
|------------------|--------------------------|---------------------------|--------|-----|--------------------------------|--------------------------------|--------------------------------|-------------------------------|-------------------------------|-------------------------------|-------------------------------|-------------------------------|-------------------------------|------------------------------|-------------------------------|-------------------------------|-------------------------------|--------------------------------|-------------------------------|-------------------------------|-------------------------------|----------------------------------|-------------------------------|-------------------------------|--------|
| 3                | 2-Methyl-1-propanol      | Ethereal, winey, cortex   | 65000  | (4) | 0.003 ± 0.000 <sup>a</sup>     | 0.003 ± 0.000 <sup>b</sup>     | 0.003 ± 0.001 <sup>a</sup>     | 0.002 ± 0.000 <sup>c</sup>    | 0.002 ± 0.000 <sup>c</sup>    | 0.003 ± 0.000 <sup>ab</sup>   | 0.003 ± 0.000 <sup>a</sup>    | 0.003 ± 0.000 <sup>b</sup>    | 0.003 ± 0.000 <sup>a</sup>    | 0.003 ± 0.000 <sup>a</sup>   | 0.003 ± 0.000 <sup>b</sup>    | 0.003 ± 0.000 <sup>a</sup>    | 0.003 ± 0.000 <sup>a</sup>    | 0.003 ± 0.000 <sup>b</sup>     | 0.003 ± 0.000 <sup>a</sup>    | 0.003 ± 0.000 <sup>b</sup>    | 0.003 ± 0.000 <sup>a</sup>    | 0.003 ± 0.000 <sup>b</sup>       | 0.003 ± 0.000 <sup>a</sup>    |                               |        |
| 27               | Ethyl octanoate***       | Fruity, wine, waxy        | 2      | (4) | 982.564 ± 105.266 <sup>b</sup> | 1073.47 ± 170.165 <sup>a</sup> | 851.083 ± 118.071 <sup>c</sup> | 630.095 ± 82.749 <sup>d</sup> | 590.123 ± 36.747 <sup>b</sup> | 654.168 ± 11.604 <sup>d</sup> | 609.223 ± 34.642 <sup>c</sup> | 467.220 ± 58.960 <sup>e</sup> | 491.568 ± 49.553 <sup>b</sup> | 558.17 ± 29.769 <sup>d</sup> | 487.806 ± 56.644 <sup>c</sup> | 347.335 ± 24.824 <sup>d</sup> | 686.660 ± 26.995 <sup>b</sup> | 769.825 ± 24.161 <sup>a</sup>  | 668.132 ± 54.353 <sup>b</sup> | 443.175 ± 45.289 <sup>c</sup> | 575.955 ± 13.579 <sup>d</sup> | 505.53 ± 7 ± 0.000 <sup>a</sup>  | 369.835 ± 25.619 <sup>d</sup> | 324.798 ± 32.603 <sup>b</sup> |        |
| 34               | Ethyl nonanoate          | Waxy, cognac, estery      | 1300   | (4) | 0.008 ± 0.000 <sup>a</sup>     | 0.007 ± 0.001 <sup>b</sup>     | <0.001                         | 0.004 ± 0.001 <sup>c</sup>    | 0.006 ± 0.001 <sup>a</sup>    | 0.006 ± 0.000 <sup>a</sup>    | 0.006 ± 0.000 <sup>a</sup>    | 0.004 ± 0.001 <sup>b</sup>    | 0.006 ± 0.001 <sup>a</sup>    | 0.006 ± 0.001 <sup>a</sup>   | 0.005 ± 0.001 <sup>b</sup>    | 0.004 ± 0.001 <sup>a</sup>    | 0.008 ± 0.000 <sup>a</sup>    | 0.007 ± 0.001 <sup>b</sup>     | 0.006 ± 0.001 <sup>a</sup>    | 0.004 ± 0.001 <sup>d</sup>    | 0.009 ± 0.000 <sup>a</sup>    | 0.005 ± 0.001 <sup>b</sup>       | 0.004 ± 0.000 <sup>a</sup>    | 0.003 ± 0.001 <sup>d</sup>    |        |
| 36               | 1-Octanol                | Waxy, green, orange       | 900    | (4) | 0.014 ± 0.001 <sup>bc</sup>    | 0.015 ± 0.001 <sup>bc</sup>    | 0.020 ± 0.005 <sup>a</sup>     | 0.013 ± 0.000 <sup>c</sup>    | 0.011 ± 0.003 <sup>b</sup>    | 0.013 ± 0.000 <sup>a</sup>    | 0.014 ± 0.001 <sup>a</sup>    | 0.010 ± 0.001 <sup>b</sup>    | 0.008 ± 0.000 <sup>c</sup>    | 0.011 ± 0.001 <sup>b</sup>   | 0.013 ± 0.002 <sup>a</sup>    | 0.008 ± 0.001 <sup>c</sup>    | 0.012 ± 0.001 <sup>c</sup>    | 0.014 ± 0.001 <sup>b</sup>     | 0.017 ± 0.000 <sup>a</sup>    | 0.012 ± 0.001 <sup>c</sup>    | 0.011 ± 0.000 <sup>a</sup>    | 0.013 ± 0.001 <sup>b</sup>       | 0.014 ± 0.002 <sup>a</sup>    | 0.010 ± 0.001 <sup>c</sup>    |        |
| 50               | Ethyl dodecanoate        | Sweet, waxy, floral       | 5900   | (5) | 0.007 ± 0.001 <sup>a</sup>     | <0.001                         | 0.004 ± 0.000 <sup>b</sup>     | 0.004 ± 0.001 <sup>b</sup>    | 0.004 ± 0.000 <sup>a</sup>    | 0.004 ± 0.000 <sup>a</sup>   | 0.004 ± 0.000 <sup>a</sup>    | <0.001                        | 0.004 ± 0.000 <sup>a</sup>    | 0.004 ± 0.000 <sup>a</sup>     | 0.004 ± 0.000 <sup>a</sup>    | 0.004 ± 0.000 <sup>a</sup>    | 0.004 ± 0.000 <sup>a</sup>    | 0.004 ± 0.000 <sup>a</sup>       | 0.004 ± 0.000 <sup>a</sup>    | 0.004 ± 0.000 <sup>a</sup>    | <0.001 |
| 54               | Nonanoic acid            | Waxy, dirty, cheese       | 3000   | (4) | 0.722 ± 0.019 <sup>a</sup>     | 0.542 ± 0.048 <sup>b</sup>     | 0.507 ± 0.107 <sup>a</sup>     | 0.301 ± 0.002 <sup>d</sup>    | 0.262 ± 0.009 <sup>a</sup>    | 0.254 ± 0.006 <sup>a</sup>    | 0.278 ± 0.016 <sup>a</sup>    | <0.001                        | 0.233 ± 0.003 <sup>a</sup>    | 0.229 ± 0.012 <sup>a</sup>   | 0.227 ± 0.014 <sup>a</sup>    | <0.001                        | 0.314 ± 0.009 <sup>a</sup>    | 0.299 ± 0.008 <sup>b</sup>     | 0.307 ± 0.025 <sup>a</sup>    | 0.238 ± 0.007 <sup>c</sup>    | 0.247 ± 0.003 <sup>b</sup>    | 0.241 ± 0.010 <sup>b</sup>       | 0.274 ± 0.006 <sup>a</sup>    | <0.001                        |        |
| <b>Citrus</b>    |                          |                           |        |     |                                |                                |                                |                               |                               |                               |                               |                               |                               |                              |                               |                               |                               |                                |                               |                               |                               |                                  |                               |                               |        |
| 8                | Limonene***              | Citrus, orange, fresh     | 10     | (5) | --                             | --                             | --                             | --                            | 2.048 ± 0.036 <sup>a</sup>    | 2.100 ± 0.031 <sup>ab</sup>   | 2.150 ± 0.047 <sup>a</sup>    | 2.150 ± 0.047 <sup>a</sup>    | 3.138 ± 0.031 <sup>a</sup>    | 3.135 ± 0.017 <sup>a</sup>   | 3.154 ± 0.026 <sup>a</sup>    | 3.154 ± 0.026 <sup>a</sup>    | 1.773 ± 0.031 <sup>a</sup>    | 1.786 ± 0.011 <sup>a</sup>     | 1.751 ± 0.029 <sup>a</sup>    | 1.785 ± 0.033 <sup>a</sup>    | 2.059 ± 0.008 <sup>a</sup>    | 2.073 ± 0.021 <sup>a</sup>       | 2.038 ± 0.036 <sup>a</sup>    | 2.038 ± 0.036 <sup>a</sup>    |        |
| 30               | 2-Ethyl-1-hexanol        | Citrus, fresh, floral     | 8000   | (4) | --                             | --                             | --                             | --                            | 0.001 ± 0.000 <sup>a</sup>    | 0.001 ± 0.000 <sup>b</sup>    | 0.002 ± 0.000 <sup>a</sup>    | 0.002 ± 0.000 <sup>a</sup>    | 0.001 ± 0.000 <sup>c</sup>    | 0.001 ± 0.000 <sup>b</sup>   | 0.002 ± 0.000 <sup>a</sup>    | 0.001 ± 0.000 <sup>a</sup>    | 0.001 ± 0.000 <sup>b</sup>    | 0.001 ± 0.000 <sup>a</sup>     | 0.001 ± 0.000 <sup>a</sup>    | 0.001 ± 0.000 <sup>b</sup>    | 0.001 ± 0.000 <sup>a</sup>    | 0.001 ± 0.000 <sup>ab</sup>      | 0.001 ± 0.000 <sup>a</sup>    | 0.001 ± 0.000 <sup>a</sup>    |        |
| <b>Green</b>     |                          |                           |        |     |                                |                                |                                |                               |                               |                               |                               |                               |                               |                              |                               |                               |                               |                                |                               |                               |                               |                                  |                               |                               |        |
| 24               | (E)-3-Hexen-1-ol***      | Green, leafy              | 400    | (4) | <0.001                         | <0.001                         | <0.001                         | <0.001                        | 1.106 ± 0.000                 | <0.001                        | <0.001                        | <0.001                        | <0.001                        | <0.001                       | <0.001                        | <0.001                        | <0.001                        | 0.030 ± 0.000                  | <0.001                        | <0.001                        | <0.001                        | <0.001                           | <0.001                        | <0.001                        |        |
| 41               | Benzeneacetaldehyde**    | Green, sweet, floral      | 4      | (4) | <0.001                         | <0.001                         | <0.001                         | 7.081 ± 1.090                 | 8.413 ± 0.609 <sup>a</sup>    | <0.001                        | <0.001                        | 8.908 ± 3.731 <sup>a</sup>    | 9.310 ± 0.658 <sup>c</sup>    | 16.267 ± 3.669 <sup>a</sup>  | 14.864 ± 2.549 <sup>b</sup>   | 9.369 ± 0.825 <sup>a</sup>    | 5.072 ± 1.947 <sup>d</sup>    | 14.944 ± 2.715 <sup>a</sup>    | 9.983 ± 1.490 <sup>b</sup>    | 7.902 ± 1.630 <sup>b</sup>    | 8.088 ± 0.937 <sup>c</sup>    | 14.721 ± 3.454 <sup>a</sup>      | 11.045 ± 3.623 <sup>b</sup>   | 10.232 ± 0.000 <sup>a</sup>   |        |
| <b>Herbal</b>    |                          |                           |        |     |                                |                                |                                |                               |                               |                               |                               |                               |                               |                              |                               |                               |                               |                                |                               |                               |                               |                                  |                               |                               |        |
| 15               | Terpinolene              | Sweet, fresh pine, citrus | 200    | (4) | --                             | --                             | --                             | --                            | 0.030 ± 0.003 <sup>a</sup>    | 0.011 ± 0.001 <sup>c</sup>    | 0.017 ± 0.001 <sup>b</sup>    | 0.005 ± 0.001 <sup>d</sup>    | 0.053 ± 0.009 <sup>a</sup>    | 0.019 ± 0.000 <sup>c</sup>   | 0.038 ± 0.006 <sup>b</sup>    | 0.012 ± 0.001 <sup>d</sup>    | 0.004 ± 0.001 <sup>a</sup>    | 0.001 ± 0.000 <sup>a</sup>     | 0.002 ± 0.000 <sup>b</sup>    | <0.001                        | 0.010 ± 0.001 <sup>a</sup>    | 0.003 ± 0.000 <sup>bc</sup>      | 0.003 ± 0.002 <sup>bc</sup>   | 0.001 ± 0.000 <sup>c</sup>    |        |
| 25               | 1-Hexanol                | Pungen, ethereal, fusel   | 8000   | (4) | 0.256 ± 0.146 <sup>a</sup>     | 0.196 ± 0.012 <sup>b</sup>     | 0.248 ± 0.047 <sup>a</sup>     | 0.168 ± 0.010 <sup>b</sup>    | 0.403 ± 0.023 <sup>a</sup>    | 0.190 ± 0.004 <sup>c</sup>    | 0.209 ± 0.010 <sup>b</sup>    | 0.187 ± 0.021 <sup>c</sup>    | 0.412 ± 0.023 <sup>a</sup>    | 0.188 ± 0.014 <sup>c</sup>   | 0.222 ± 0.030 <sup>b</sup>    | 0.165 ± 0.010 <sup>d</sup>    | 0.423 ± 0.026 <sup>a</sup>    | 0.203 ± 0.009 <sup>bc</sup>    | 0.231 ± 0.008 <sup>b</sup>    | 0.174 ± 0.006 <sup>c</sup>    | 0.472 ± 0.017 <sup>a</sup>    | 0.186 ± 0.004 <sup>c</sup>       | 0.208 ± 0.017 <sup>b</sup>    | 0.194 ± 0.023 <sup>c</sup>    |        |
| <b>Acidic</b>    |                          |                           |        |     |                                |                                |                                |                               |                               |                               |                               |                               |                               |                              |                               |                               |                               |                                |                               |                               |                               |                                  |                               |                               |        |
| 28               | Acetic acid              | Pungent, acidic, cheesy   | 200000 | (4) | <0.001                         | <0.001                         | <0.001                         | <0.001                        | <0.001                        | <0.001                        | <0.001                        | <0.001                        | <0.001                        | <0.001                       | <0.001                        | <0.001                        | <0.001                        | <0.001                         | <0.001                        | <0.001                        | <0.001                        | <0.001                           | <0.001                        | <0.001                        |        |
| <b>Aldehydic</b> |                          |                           |        |     |                                |                                |                                |                               |                               |                               |                               |                               |                               |                              |                               |                               |                               |                                |                               |                               |                               |                                  |                               |                               |        |
| 19               | Octanal***               | Aldehydic, waxy, citrus   | 50     | (4) | 41.641 ± 4.502 <sup>b</sup>    | 51.365 ± 5.887 <sup>a</sup>    | 42.490 ± 6.356 <sup>b</sup>    | 40.117 ± 2.231 <sup>b</sup>   | 43.980 ± 2.570 <sup>b</sup>   | 49.580 ± 0.790 <sup>c</sup>   | 43.140 ± 1.346 <sup>b</sup>   | 41.450 ± 3.474 <sup>b</sup>   | 44.400 ± 1.749 <sup>b</sup>   | 45.647 ± 7.081 <sup>a</sup>  | 43.595 ± 6.034 <sup>b</sup>   | 42.406 ± 1.478 <sup>b</sup>   | 40.779 ± 0.944 <sup>b</sup>   | 45.716 ± 0.905 <sup>a</sup>    | 41.138 ± 2.102 <sup>b</sup>   | 37.159 ± 2.037 <sup>c</sup>   | 38.062 ± 3.087 <sup>b</sup>   | 43.399 ± 1.692 <sup>d</sup>      | 38.651 ± 2.487 <sup>b</sup>   | 36.929 ± 3.301 <sup>b</sup>   |        |
| <b>Balsamic</b>  |                          |                           |        |     |                                |                                |                                |                               |                               |                               |                               |                               |                               |                              |                               |                               |                               |                                |                               |                               |                               |                                  |                               |                               |        |
| 40               | Ethyl 2-furancarboxylate | Balsamic, fruity, floral  | --     | --  | --                             | --                             | --                             | --                            | --                            | --                            | --                            | --                            | --                            | --                           | --                            | --                            | --                            | --                             | --                            | --                            | --                            | --                               | --                            | --                            |        |
| <b>Buttery</b>   |                          |                           |        |     |                                |                                |                                |                               |                               |                               |                               |                               |                               |                              |                               |                               |                               |                                |                               |                               |                               |                                  |                               |                               |        |
| 16               | 3-Hydroxy-2-butanone     | Sweet, buttery, creamy    | 150000 | (4) | <0.001                         | <0.001                         | <0.001                         | <0.001                        | <0.001                        | <0.001                        | <0.001                        | <0.001                        | <0.001                        | <0.001                       | <0.001                        | <0.001                        | <0.001                        | <0.001                         | <0.001                        | <0.001                        | <0.001                        | <0.001                           | <0.001                        | <0.001                        |        |
| <b>Creamy</b>    |                          |                           |        |     |                                |                                |                                |                               |                               |                               |                               |                               |                               |                              |                               |                               |                               |                                |                               |                               |                               |                                  |                               |                               |        |
| 38               | 2,3-Butanediol           | Fruity, creamy, buttery   | 120000 | (4) | <0.001                         | <0.001                         | <0.001                         | <0.001                        | <0.001                        | <0.001                        | <0.001                        | <0.001                        | <0.001                        | <0.001                       | <0.001                        | <0.001                        | <0.001                        | <0.001                         | <0.001                        | <0.001                        | <0.001                        | <0.001                           | <0.001                        | <0.001                        |        |
| <b>Fatty</b>     |                          |                           |        |     |                                |                                |                                |                               |                               |                               |                               |                               |                               |                              |                               |                               |                               |                                |                               |                               |                               |                                  |                               |                               |        |
| 49               | Hexanoic acid***         | Sour, fatty, sweaty       | 3000   | (4) | 1.456 ± 0.066 <sup>b</sup>     | 1.329 ± 0.057 <sup>b</sup>     | 1.826 ± 0.378 <sup>a</sup>     | 1.121 ± 0.032 <sup>c</sup>    | 1.213 ± 0.041 <sup>b</sup>    | 1.230 ± 0.048 <sup>b</sup>    | 1.500 ± 0.076 <sup>c</sup>    | 1.228 ± 0.146 <sup>b</sup>    | 1.212 ± 0.082 <sup>b</sup>    | 1.205 ± 0.049 <sup>b</sup>   | 1.596 ± 0.189 <sup>a</sup>    | 1.163 ± 0.068 <sup>b</sup>    | 1.366 ± 0.073 <sup>b</sup>    | 1.372 ± 0.067 <sup>b</sup>     | 1.681 ± 0.106 <sup>c</sup>    | 1.250 ± 0.064 <sup>c</sup>    | 1.480 ± 0.055 <sup>b</sup>    | 1.240 ± 0.063 <sup>c</sup>       | 1.593 ± 0.163 <sup>a</sup>    | 1.423 ± 0.103 <sup>b</sup>    |        |
| 53               | Octanoic acid            | Fatty, waxy, rancid       | 26000  | (4) | 0.322 ± 0.016 <sup>a</sup>     | 0.257 ± 0.031 <sup>c</sup>     | 0.294 ± 0.082 <sup>b</sup>     | 0.158 ± 0.005 <sup>d</sup>    | 0.164 ± 0.008 <sup>c</sup>    | 0.133 ± 0.004 <sup>b</sup>    | 0.163 ± 0.007 <sup>c</sup>    | 0.116 ± 0.014 <sup>c</sup>    | 0.126 ± 0.009 <sup>a</sup>    | 0.111 ± 0.003 <sup>ab</sup>  | 0.135 ± 0.019 <sup>a</sup>    | 0.090 ± 0.004 <sup>b</sup>    | 0.217 ± 0.007 <sup>c</sup>    | 0.198 ± 0.005 <sup>b</sup>     | 0.209 ± 0.011 <sup>a</sup>    | 0.140 ± 0.014 <sup>c</sup>    | 0.173 ± 0.008 <sup>c</sup>    | 0.129 ± 0.002 <sup>c</sup>       | 0.142 ± 0.016 <sup>b</sup>    | 0.122 ± 0.006 <sup>c</sup>    |        |
| <b>Pungent</b>   |                          |                           |        |     |                                |                                |                                |                               |                               |                               |                               |                               |                               |                              |                               |                               |                               |                                |                               |                               |                               |                                  |                               |                               |        |
| 45               | Naphthalene              | Pungent, dry, tarry       | 21     | (8) | <0.001                         | <0.001                         | <0.001                         | <0.001                        | <0.001                        | <0.001                        | <0.001                        | <0.001                        | <0.001                        | <0.001                       | <0.001                        | <0.001                        | <0.001                        | <0.001                         | <0.001                        | <0.001                        | <0.001                        | <0.001                           | <0.001                        | <0.001                        |        |
| <b>Spicy</b>     |                          |                           |        |     |                                |                                |                                |                               |                               |                               |                               |                               |                               |                              |                               |                               |                               |                                |                               |                               |                               |                                  |                               |                               |        |
| 32               | Myristicin               | Spicy, warm, balsamic     | --     | --  | --                             | --                             | --                             | --                            | --                            | --                            | --                            | --                            | --                            | --                           | --                            | --                            | --                            | --                             | --                            | --                            | --                            | --                               | --                            | --                            |        |
| <b>Winey</b>     |                          |                           |        |     |                                |                                |                                |                               |                               |                               |                               |                               |                               |                              |                               |                               |                               |                                |                               |                               |                               |                                  |                               |                               |        |
| 7                | 2-Hexanol***             | Chemical, winey, fruity   | 6      | (6) | 130.603 ± 24.253 <sup>b</sup>  | <0.001                         | 165.496 ± 9.811 <sup>a</sup>   | 47.295 ± 11.319 <sup>c</sup>  | 169.340 ± 18.097 <sup>b</sup> | <0.001                        | 202.126 ± 27.845 <sup>a</sup> | 137.360 ± 57.070 <sup>c</sup> | 206.82 ± 13.514 <sup>b</sup>  | 837.89 ± 0.000 <sup>a</sup>  | 198.048 ± 39.916 <sup>b</sup> | 117.602 ± 42.974 <sup>c</sup> | 207.317 ± 34.794 <sup>b</sup> | 647.531 ± 175.732 <sup>a</sup> | 159.018 ± 30.799 <sup>c</sup> | <0.001                        | 195.939 ± 5.330 <sup>b</sup>  | 230.12 ± 8 ± 10.898 <sup>a</sup> | 160.324 ± 10.443 <sup>c</sup> | <0.001                        |        |

| Others |                                         |          |    |     |        |        |        |        |        |        |        |        |        |        |        |        |        |        |        |        |        |        |        |
|--------|-----------------------------------------|----------|----|-----|--------|--------|--------|--------|--------|--------|--------|--------|--------|--------|--------|--------|--------|--------|--------|--------|--------|--------|--------|
| 9      | 3-Hydroxymandelic acid ethyl ester      | --       | -- | --  | --     | --     | --     | --     | --     | --     | --     | --     | --     | --     | --     | --     | --     | --     | --     | --     | --     | --     | --     |
| 12     | 1-(2-Aminoethylamino)-2-propanol        | --       | -- | --  | --     | --     | --     | --     | --     | --     | --     | --     | --     | --     | --     | --     | --     | --     | --     | --     | --     | --     | --     |
| 13     | 3-Hydroxybutanal                        | --       | -- | --  | --     | --     | --     | --     | --     | --     | --     | --     | --     | --     | --     | --     | --     | --     | --     | --     | --     | --     | --     |
| 17     | Ethoxyacetic acid                       | --       | -- | --  | --     | --     | --     | --     | --     | --     | --     | --     | --     | --     | --     | --     | --     | --     | --     | --     | --     | --     | --     |
| 26     | 2-Methyl-4-heptanol                     | --       | -- | --  | --     | --     | --     | --     | --     | --     | --     | --     | --     | --     | --     | --     | --     | --     | --     | --     | --     | --     | --     |
| 29     | Pterin-6-carboxylic acid                | --       | -- | --  | --     | --     | --     | --     | --     | --     | --     | --     | --     | --     | --     | --     | --     | --     | --     | --     | --     | --     | --     |
| 46     | 1,2-dihydro-1,1,6-trimethyl-naphthalene | Licorice | 20 | (1) | <0.001 | <0.001 | <0.001 | <0.001 | <0.001 | <0.001 | <0.001 | <0.001 | <0.001 | <0.001 | <0.001 | <0.001 | <0.001 | <0.001 | <0.001 | <0.001 | <0.001 | <0.001 | <0.001 |

\* = Odor descriptors were obtained from TGSC<sup>25</sup>

\*\* = Reference: (1) = Crandles et al.<sup>26</sup>, (2) = Jiang et al.<sup>27</sup>, (3) = Li et al.<sup>28</sup>, (4) = Liang et al.<sup>29</sup>, (5) = Pino & Oscar<sup>30</sup>, (6) = Vázquez-Araújo et al.<sup>31</sup>, (7) = Wang et al.<sup>32</sup>, (8) = Wang et al.<sup>33</sup>.

\*\*\* = Odor-active compound (OAV >1 under at least one of the treatments)

Samples of C, 2GC, 4GC etc. refer to Table S2.

-- = Not available.

a-d = Values with different superscripts in the same wine group are significantly different ( $p \leq 0.05$ )





|    |                                             |          |    |     |    |    |    |    |        |        |        |        |        |        |        |        |        |        |        |        |        |        |        |
|----|---------------------------------------------|----------|----|-----|----|----|----|----|--------|--------|--------|--------|--------|--------|--------|--------|--------|--------|--------|--------|--------|--------|--------|
| 12 | 1-(2-Aminoethylamino)-<br>2-propanol        | --       | -- | --  | -- | -- | -- | -- | --     | --     | --     | --     | --     | --     | --     | --     | --     | --     | --     | --     | --     | --     | --     |
| 13 | 3-Hydroxybutanal                            | --       | -- | --  | -- | -- | -- | -- | --     | --     | --     | --     | --     | --     | --     | --     | --     | --     | --     | --     | --     | --     | --     |
| 17 | Ethoxyacetic acid                           | --       | -- | --  | -- | -- | -- | -- | --     | --     | --     | --     | --     | --     | --     | --     | --     | --     | --     | --     | --     | --     | --     |
| 26 | 2-Methyl-4-heptanol                         | --       | -- | --  | -- | -- | -- | -- | --     | --     | --     | --     | --     | --     | --     | --     | --     | --     | --     | --     | --     | --     | --     |
| 29 | Pterin-6-carboxylic acid                    | --       | -- | --  | -- | -- | -- | -- | --     | --     | --     | --     | --     | --     | --     | --     | --     | --     | --     | --     | --     | --     | --     |
| 46 | 1,2-dihydro-1,1,6-<br>trimethyl-naphthalene | Licorice | 20 | (1) | -- | -- | -- | -- | <0.001 | <0.001 | <0.001 | <0.001 | <0.001 | <0.001 | <0.001 | <0.001 | <0.001 | <0.001 | <0.001 | <0.001 | <0.001 | <0.001 | <0.001 |

\* = Odor descriptors were obtained from TGSC<sup>25</sup>

\*\* = Reference: (1) = Crandles et al.<sup>26</sup>, (2) = Jiang et al.<sup>27</sup>, (3) = Li et al.<sup>28</sup>, (4) = Liang et al.<sup>29</sup>, (5) = Pino & Oscar<sup>30</sup>, (6) = Vázquez-Araújo et al.<sup>31</sup>, (7) = Wang et al.<sup>32</sup>, (8) = Wang et al.<sup>33</sup>.

\*\*\* = Odor-active compound (OAV >1 under at least one of the treatments)

Samples of M, 2GM, 4GM etc. refer to Table S3.

-- = Not available.

a-d = Values with different superscripts in the same row are significantly different ( $p \leq 0.05$ )

**Table S12** The distribution of 62 consumers by different categories in sensory JAR analysis of the wines

| Category                 |                       | Control<br>Chardonnay | 2% (w/v) Green tea<br>Chardonnay | 4% (w/v) Green tea<br>Chardonnay | 1% (w/v) Black tea<br>Chardonnay | 3% (w/v) Black tea<br>Chardonnay |
|--------------------------|-----------------------|-----------------------|----------------------------------|----------------------------------|----------------------------------|----------------------------------|
| <i>Age</i>               | 18 to 24              | 32                    | 32                               | 32                               | 32                               | 32                               |
|                          | 25 to 30              | 26                    | 26                               | 26                               | 26                               | 26                               |
|                          | 31 to 40              | 3                     | 3                                | 3                                | 3                                | 3                                |
|                          | 41 to 55              | 1                     | 1                                | 1                                | 1                                | 1                                |
| <i>Gender</i>            | Male                  | 25                    | 25                               | 25                               | 25                               | 25                               |
|                          | Female                | 37                    | 37                               | 37                               | 37                               | 37                               |
| <i>Occupation</i>        | Student               | 54                    | 54                               | 54                               | 54                               | 54                               |
|                          | Wine related work     | 1                     | 1                                | 1                                | 1                                | 1                                |
|                          | Non-wine related work | 7                     | 7                                | 7                                | 7                                | 7                                |
| <i>Visual</i>            |                       |                       |                                  |                                  |                                  |                                  |
| Colour intensity         | Too pale              | 12                    | 1                                | 0                                | 0                                | 0                                |
|                          | A little pale         | 24                    | 9                                | 3                                | 0                                | 0                                |
|                          | Just about right      | 24                    | 38                               | 32                               | 12                               | 3                                |
|                          | A little dark         | 2                     | 14                               | 26                               | 43                               | 14                               |
|                          | Too dark              | 0                     | 0                                | 1                                | 7                                | 45                               |
| <i>Olfactory (aroma)</i> |                       |                       |                                  |                                  |                                  |                                  |
| Fruit smell              | Too weak              | 8                     | 8                                | 7                                | 2                                | 9                                |
|                          | Weak                  | 20                    | 24                               | 23                               | 18                               | 18                               |
|                          | Just about right      | 22                    | 20                               | 24                               | 31                               | 9                                |
|                          | Strong                | 12                    | 8                                | 7                                | 11                               | 22                               |
|                          | Too strong            | 0                     | 1                                | 1                                | 0                                | 4                                |
| Vegetal smell            | Too weak              | 12                    | 4                                | 2                                | 4                                | 1                                |
|                          | Weak                  | 27                    | 15                               | 8                                | 21                               | 8                                |
|                          | Just about right      | 19                    | 23                               | 22                               | 26                               | 19                               |
|                          | Strong                | 4                     | 19                               | 27                               | 9                                | 21                               |
|                          | Too strong            | 0                     | 1                                | 3                                | 2                                | 13                               |
| Floral smell             | Too weak              | 14                    | 10                               | 9                                | 5                                | 8                                |
|                          | Weak                  | 22                    | 24                               | 23                               | 20                               | 19                               |
|                          | Just about right      | 20                    | 22                               | 22                               | 25                               | 19                               |
|                          | Strong                | 6                     | 6                                | 8                                | 11                               | 16                               |
|                          | Too strong            | 0                     | 0                                | 0                                | 1                                | 0                                |



|                                  |                  |    |    |    |    |    |
|----------------------------------|------------------|----|----|----|----|----|
| Odour intensity                  | Too weak         | 4  | 4  | 3  | 3  | 2  |
|                                  | Weak             | 17 | 13 | 10 | 8  | 6  |
|                                  | Just about right | 35 | 28 | 33 | 39 | 23 |
|                                  | Strong           | 6  | 17 | 15 | 11 | 24 |
|                                  | Too strong       | 0  | 0  | 1  | 1  | 7  |
| <i>Olfactive (taste/ flavor)</i> |                  |    |    |    |    |    |
| Fruit flavor                     | Too weak         | 5  | 16 | 26 | 3  | 15 |
|                                  | Weak             | 18 | 28 | 23 | 16 | 18 |
|                                  | Just about right | 28 | 16 | 9  | 31 | 13 |
|                                  | Strong           | 11 | 2  | 3  | 12 | 15 |
|                                  | Too strong       | 0  | 0  | 1  | 0  | 1  |
| Vegetal taste and flavor         | Too weak         | 11 | 5  | 5  | 4  | 5  |
|                                  | Weak             | 29 | 12 | 16 | 18 | 15 |
|                                  | Just about right | 14 | 19 | 4  | 31 | 11 |
|                                  | Strong           | 6  | 21 | 22 | 8  | 17 |
|                                  | Too strong       | 2  | 5  | 15 | 1  | 14 |
| Floral flavor                    | Too weak         | 16 | 15 | 17 | 4  | 10 |
|                                  | Weak             | 19 | 24 | 27 | 19 | 28 |
|                                  | Just about right | 24 | 19 | 9  | 31 | 12 |
|                                  | Strong           | 3  | 4  | 9  | 8  | 10 |
|                                  | Too strong       | 0  | 0  | 0  | 0  | 2  |
| <i>Mouthfeel/ texture</i>        |                  |    |    |    |    |    |
| Sweetness                        | Too weak         | 5  | 25 | 29 | 5  | 16 |
|                                  | Weak             | 15 | 27 | 24 | 18 | 24 |
|                                  | Just about right | 24 | 10 | 9  | 28 | 19 |
|                                  | Strong           | 18 | 0  | 0  | 11 | 2  |
|                                  | Too strong       | 0  | 0  | 0  | 0  | 1  |
| Bitterness                       | Too weak         | 15 | 2  | 0  | 1  | 2  |
|                                  | Weak             | 17 | 5  | 2  | 22 | 8  |
|                                  | Just about right | 22 | 15 | 9  | 28 | 22 |
|                                  | Strong           | 7  | 27 | 18 | 10 | 18 |
|                                  | Too strong       | 1  | 13 | 33 | 1  | 12 |
| Sourness                         | Too weak         | 4  | 1  | 4  | 3  | 3  |
|                                  | Weak             | 13 | 9  | 4  | 7  | 5  |
|                                  | Just about right | 29 | 9  | 15 | 32 | 20 |

|                           |                          |    |    |    |    |    |
|---------------------------|--------------------------|----|----|----|----|----|
|                           | Strong                   | 14 | 32 | 20 | 16 | 21 |
|                           | Too strong               | 2  | 11 | 19 | 4  | 13 |
| Astringency               | Too weak                 | 2  | 1  | 0  | 0  | 1  |
|                           | Weak                     | 14 | 7  | 4  | 11 | 9  |
|                           | Just about right         | 35 | 21 | 15 | 38 | 19 |
|                           | Strong                   | 10 | 24 | 29 | 11 | 26 |
|                           | Too strong               | 1  | 8  | 14 | 2  | 7  |
| Viscosity                 | Too weak                 | 3  | 3  | 4  | 0  | 2  |
|                           | Weak                     | 22 | 24 | 18 | 12 | 14 |
|                           | Just about right         | 32 | 19 | 26 | 38 | 31 |
|                           | Strong                   | 5  | 16 | 12 | 11 | 12 |
|                           | Too strong               | 0  | 0  | 2  | 1  | 3  |
| Length                    | Too weak                 | 3  | 3  | 1  | 2  | 2  |
|                           | Weak                     | 15 | 15 | 11 | 15 | 9  |
|                           | Just about right         | 33 | 21 | 19 | 30 | 22 |
|                           | Strong                   | 11 | 19 | 19 | 14 | 25 |
|                           | Too strong               | 0  | 4  | 12 | 1  | 4  |
| <i>Overall perception</i> |                          |    |    |    |    |    |
| Overall liking            | Dislike very much        | 0  | 13 | 20 | 3  | 12 |
|                           | Dislike moderately       | 7  | 10 | 10 | 4  | 11 |
|                           | Dislike slightly         | 8  | 12 | 19 | 7  | 11 |
|                           | Neither like nor dislike | 10 | 17 | 6  | 13 | 7  |
|                           | Like slightly            | 12 | 7  | 6  | 14 | 7  |
|                           | Like moderately          | 14 | 1  | 0  | 7  | 10 |
|                           | Like very much           | 11 | 2  | 1  | 14 | 4  |
| Purchase intention        | Extremely unlikely       | 1  | 11 | 17 | 3  | 12 |
|                           | Unlikely                 | 14 | 30 | 32 | 7  | 22 |
|                           | Neutral                  | 23 | 17 | 10 | 24 | 15 |
|                           | Likely                   | 21 | 3  | 3  | 22 | 10 |
|                           | Extremely likely         | 3  | 1  | 0  | 6  | 3  |

---

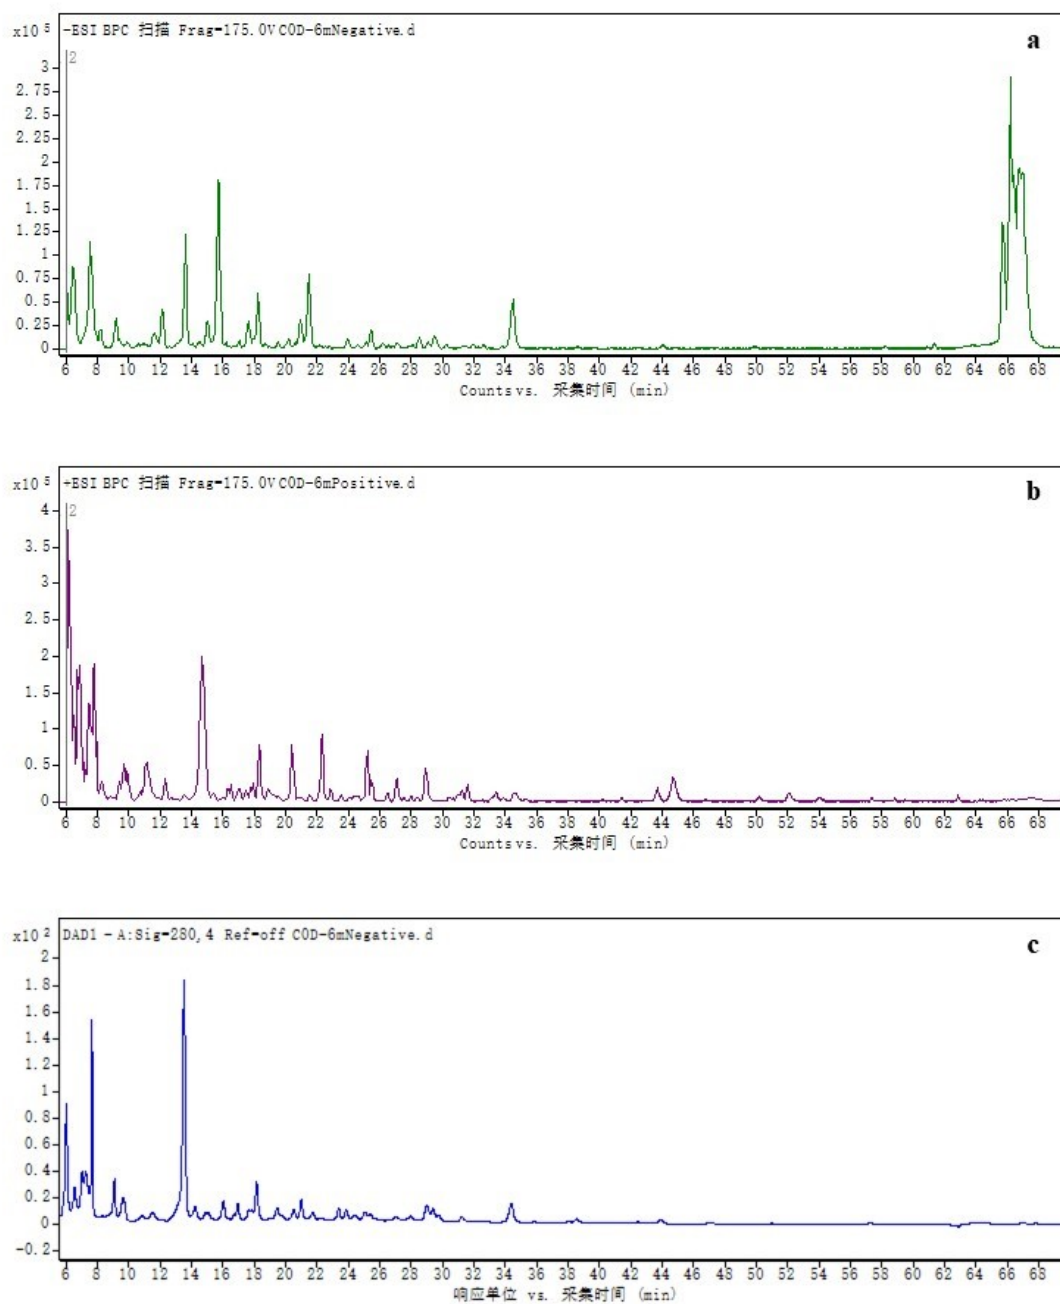

**Figure S1** HPLC-DAD-MS chromatograms of phenolic compounds from 6 month-aged control Chardonnay wine detected at negative (a) and positive (b) model and 280 nm (c)

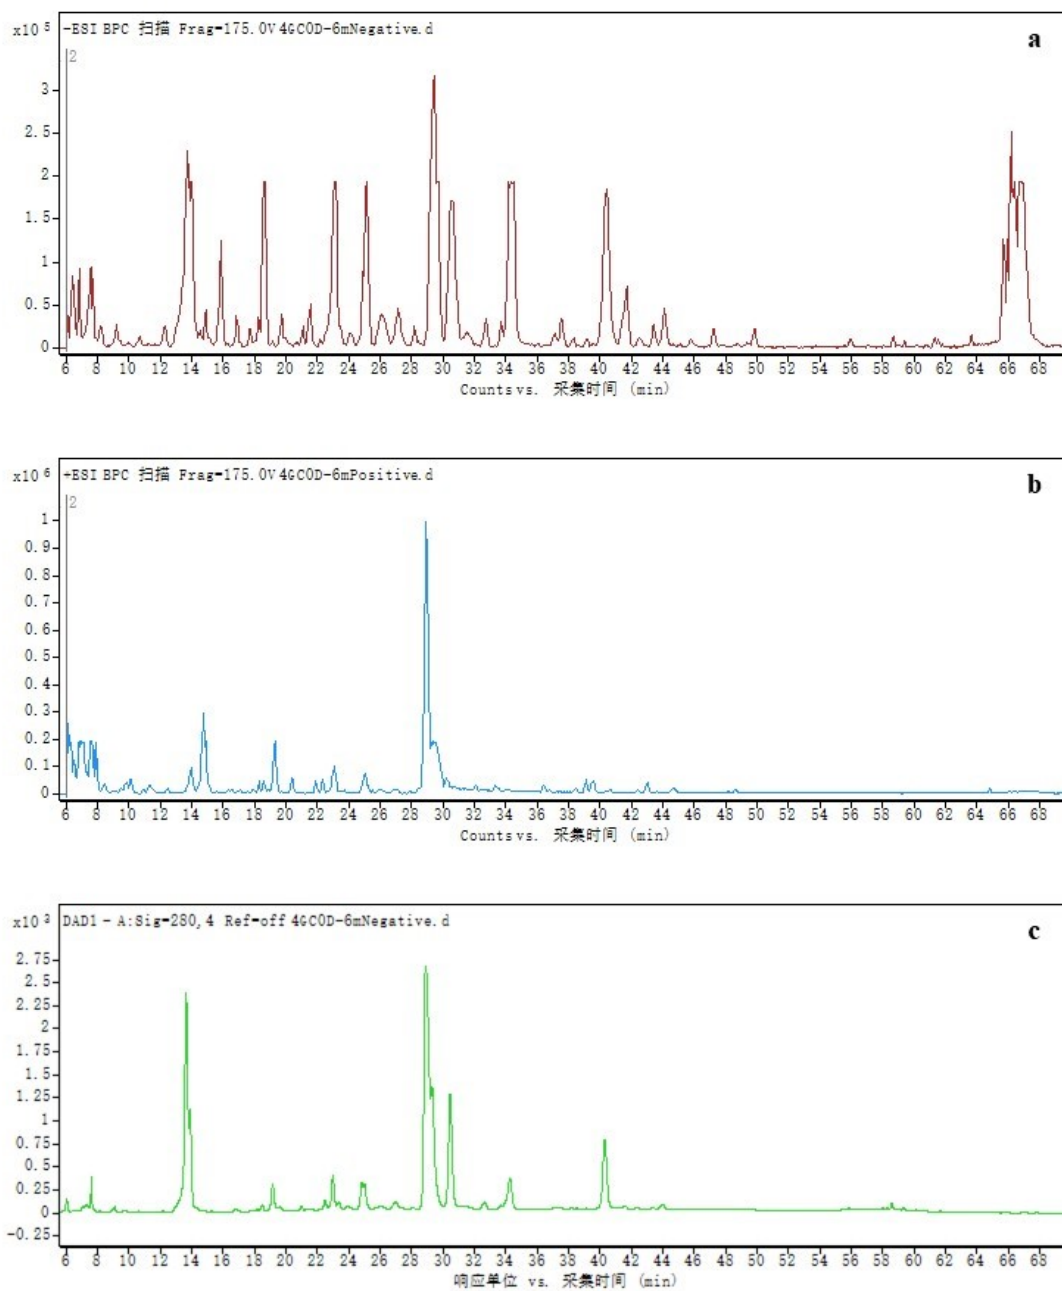

**Figure S2** HPLC-DAD-MS chromatograms of phenolic compounds from 6 month-aged green tea-macerated Chardonnay wine detected at negative (a) and positive (b) model and 280 nm (c)

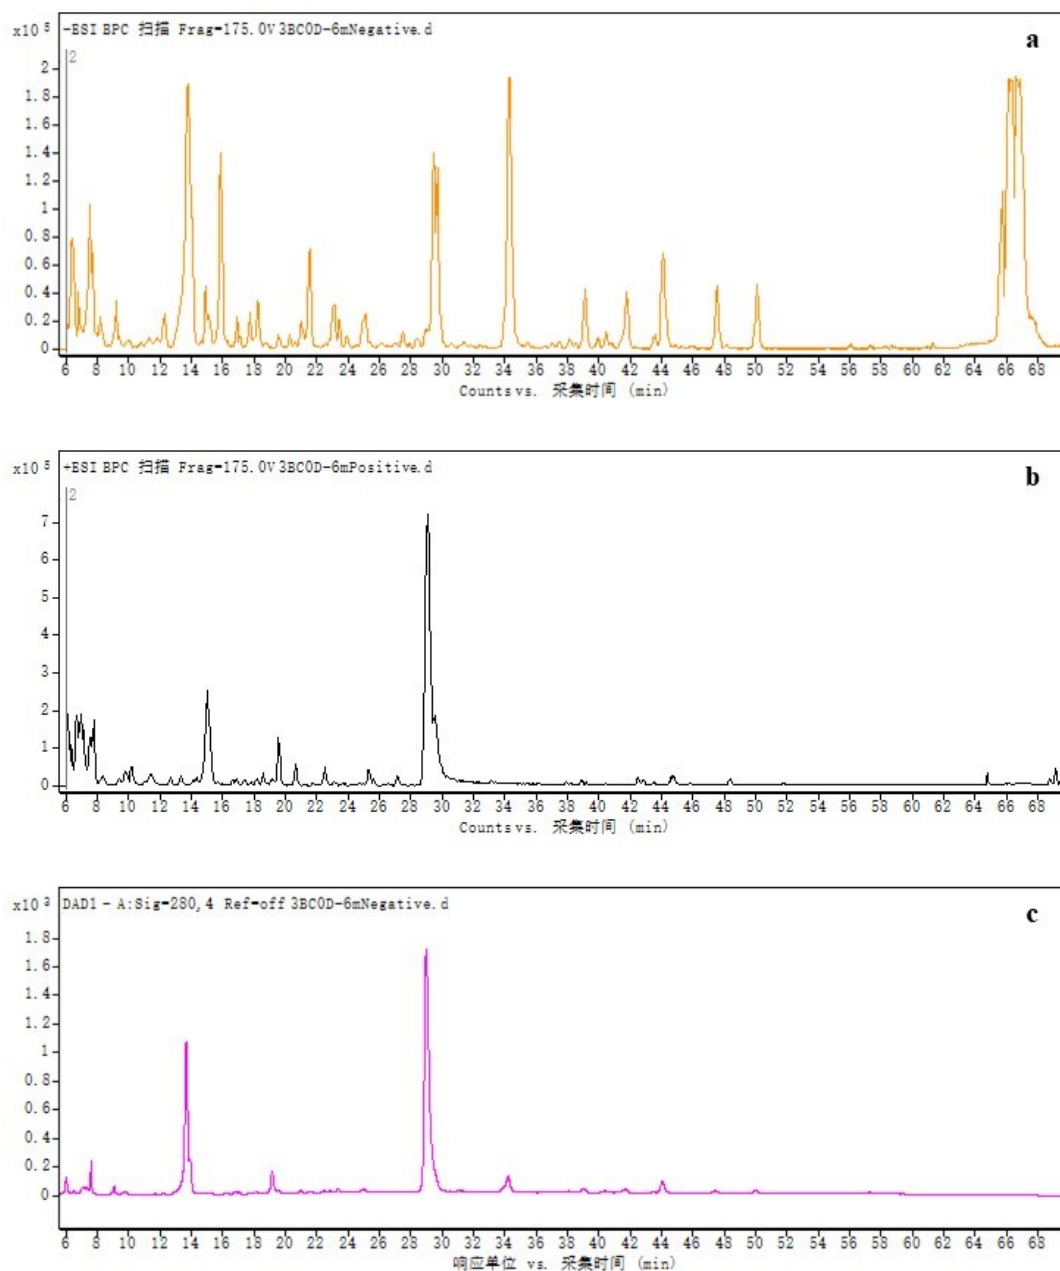

**Figure S3** HPLC-DAD-MS chromatograms of phenolic compounds from 6 month-aged black tea-macerated Chardonnay wine detected at negative (a) and positive (b) model and 280 nm (c)

丰度

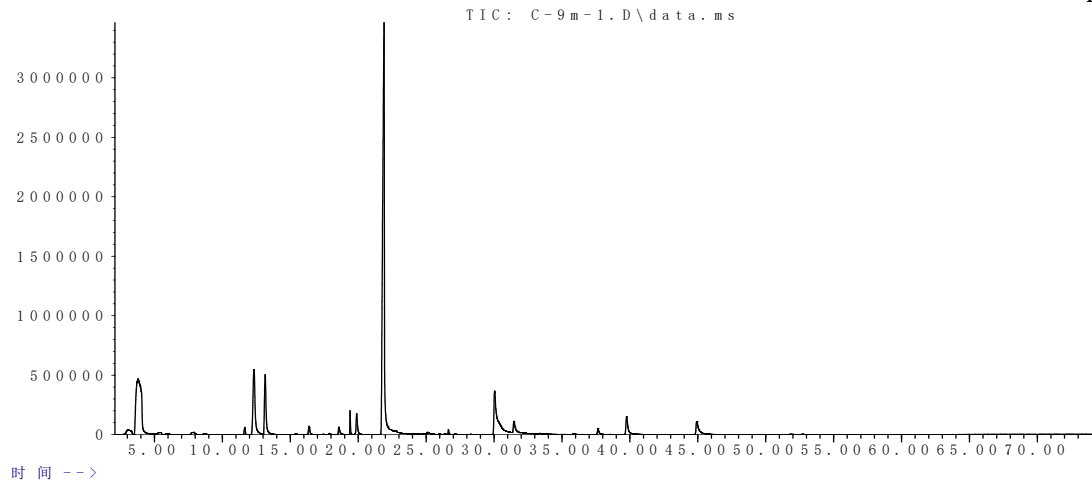

**A**

丰度

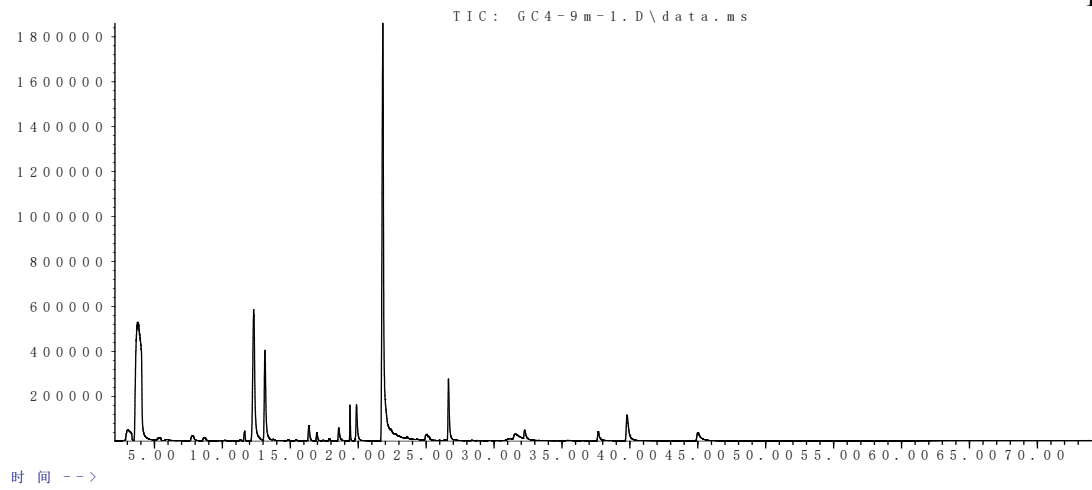

**B**

丰度

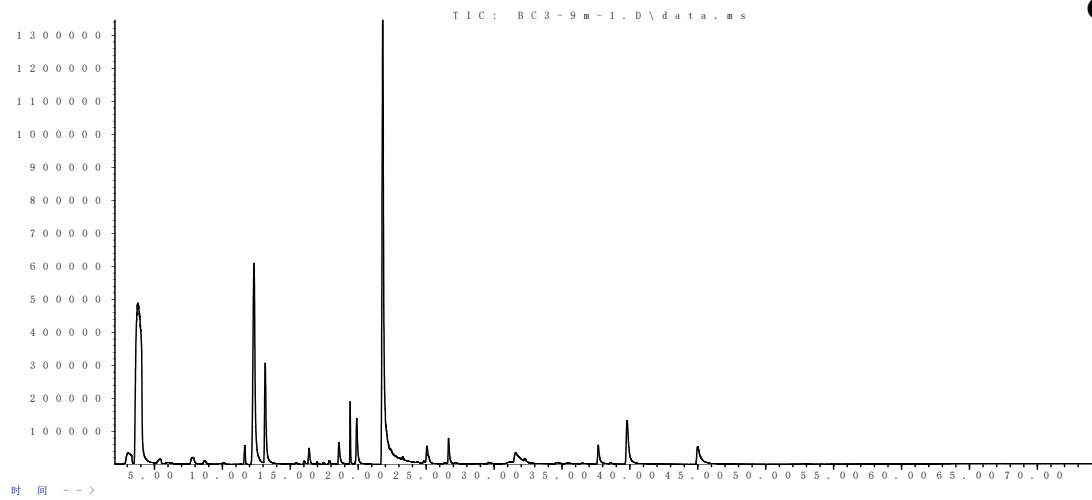

**C**

**Figure S4** Gas chromatography-mass spectrometry (GC-MS) chromatograms showing the volatile compound profile of control Chardonnay wine (A), green tea-macerated

Chardonnay wine (B), and black tea-macerated Chardonnay wine (C) after 9 months of aging

## References

- 1 H. Ashihara, W.-W. Deng, W. Mullen and A. Crozier, Distribution and biosynthesis of flavan-3-ols in *Camellia sinensis* seedlings and expression of genes encoding biosynthetic enzymes, *Phytochemistry*, 2010, **71**, 559-566.
- 2 D. H. Bastos, L. A. Saldanha, R. R. Catharino, A. Sawaya, I. B. Cunha, P. O. Carvalho and M. N. Eberlin, Phenolic antioxidants identified by ESI-MS from yerba maté (*Ilex paraguariensis*) and green tea (*Camellia sinensis*) extracts, *Molecules*, 2007, **12**, 423-432.
- 3 Y. Chen, S. Tang, Y. Chen, R. Zhang, M. Zhou, C. Wang, N. Feng and Q. Wu, Structure-activity relationship of procyanidins on advanced glycation end products formation and corresponding mechanisms, *Food Chem.*, 2019, **272**, 679-687.
- 4 W. Dai, D. Qi, T. Yang, H. Lv, L. Guo, Y. Zhang, Y. Zhu, Q. Peng, D. Xie, J. Tan and Z. Lin, Nontargeted analysis using ultraperformance liquid chromatography-quadrupole time-of-flight mass spectrometry uncovers the effects of harvest season on the metabolites and taste quality of tea (*Camellia sinensis* L.), *J. Agric. Food Chem.*, 2015, **63**, 9869-9878.
- 5 X. Dai, J. Zhuang, Y. Wu, P. Wang, G. Zhao, Y. Liu, X. Jiang, L. Gao and T. Xia, Identification of a flavonoid glucosyltransferase involved in 7-OH site glycosylation in tea plants (*Camellia sinensis*), *Sci. Rep.*, 2017, **7**, 5926.
- 6 D. Del Rio, A. J. Stewart, W. Mullen, J. Burns, M. E. J. Lean, F. Brighenti and A. Crozier, HPLC-MSn analysis of phenolic compounds and purine alkaloids in green and black tea, *J. Agric. Food Chem.*, 2004, **52**, 2807-2815.
- 7 D. Fracassetti, C. Costa, L. Moulay and F. A. Tomás-Barberán, Ellagic acid derivatives, ellagitannins, proanthocyanidins and other phenolics, vitamin C and antioxidant capacity of two powder products from camu-camu fruit (*Myrciaria dubia*), *Food Chem.*, 2013, **139**, 578-588.



- 8 N. Itoh, Y. Katsube, K. Yamamoto, N. Nakajima, K. Yoshida, Laccase-catalyzed conversion of green tea catechins in the presence of gallic acid to epitheaflagallin and epitheaflagallin 3-*O*-gallate, *Tetrahedron*, 2007, **63**, 9488-9492.
- 9 X. Jiang, Y. Liu, W. Li, L. Zhao, F. Meng, Y. Wang, H. Tan, H. Yang, C. Wei, X. Wan, L. Gao and T. Xia, Tissue-specific, development-dependent phenolic compounds accumulation profile and gene expression pattern in tea plant [*Camellia sinensis*], *PLoS One*, 2013, **8**, e62315.
- 10 D. Z. Lantzouraki, V. J. Sinanoglou, T. Tsiaka, C. Proestos and P. Zoumpoulakis, Total phenolic content, antioxidant capacity and phytochemical profiling of grape and pomegranate wines, *RSC Adv.*, 2015, **5**, 101683-101692.
- 11 L.-Z. Lin, P. Chen and J. M. Harnly, New phenolic components and chromatographic profiles of green and fermented teas, *J. Agric. Food Chem.*, 2008, **56**, 8130-8140.
- 12 X.-H. Meng, H.-T. Zhu, H. Yan, D. Wang, C.-R. Yang and Y.-J. Zhang, C-8 *N*-ethyl-2-pyrrolidinone-substituted flavan-3-ols from the leaves of *Camellia sinensis* var. *pubilimba*, *J. Agric. Food Chem.*, 2018, **66**, 7150-7155.
- 13 X. Qi, Reactive oxygen species scavenging activities and inhibition on DNA oxidative damage of dimeric compounds from the oxidation of (–)-epigallocatechin-3-*O*-gallate, *Fitoterapia*, 2010, **81**, 205-209.
- 14 F. Rossetti, V. Merkyte, E. Longo, B. Pavlic, M. Jourdes, P.-L. Teissedre and E. Boselli, Volatile, phenolic, and sensory profiles of in-amphorae Chardonnay wine by mass spectrometry and chemometric analysis, *J. Mass Spectrom.*, 2018, **53**, 833-841.
- 15 S. Sang and C. S. Yang, Structural identification of novel glucoside and glucuronide metabolites of (–)-epigallocatechin-3-gallate in mouse urine using liquid

chromatography/electrospray ionization tandem mass spectrometry, *Rapid Commun. Mass Spectrom.*, 2008, **22**, 3693-3699.

16 C. T. Scoparo, L. M. de Souza, N. Dartora, G. L. Sasaki, P. A. J. Gorin and M. Iacomini, Analysis of *Camellia sinensis* green and black teas via ultra high performance liquid chromatography assisted by liquid-liquid partition and two-dimensional liquid chromatography (size exclusion × reversed phase), *J. Chromatogr. A*, 2012, **1222**, 29-37.

17 D. Topi, H. Kelebek, G. Guclu and S. Selli, LC-DAD-ESI-MS/MS characterization of phenolic compounds in wines from *Vitis vinifera* ‘Shesh i bardhë’ and ‘Vlosh’ cultivars, *J. Food Process. Preserv.*, 2021, **46**, e16157.

18 D. Wang, J. Lu, A. Miao, Z. Xie and D. Yang, HPLC-DAD-ESI-MS/MS analysis of polyphenols and purine alkaloids in leaves of 22 tea cultivars in China, *J. Food Compos. Anal.*, 2008, **21**, 361-369.

19 W. Wang, S. Zhang, L. Lv and S. Sang, A new method to prepare and redefine black tea thearubigins, *J. Chromatogr. A*, 2018, **1563**, 82-88.

20 H. Xie, X. Li, Z. Ren, W. Qiu, J. Chen, Q. Jiang, B. Chen and D. Chen, Antioxidant and cytoprotective effects of Tibetan tea and its phenolic components, *Molecules*, 2018, **23**, 179.

21 B. Zhang, Z. Deng, D. D. Ramdath, Y. Tang, P. X. Chen, R. Liu, Q. Liu and R. Tsao, Phenolic profiles of 20 Canadian lentil cultivars and their contribution to antioxidant activity and inhibitory effects on  $\alpha$ -glucosidase and pancreatic lipase, *Food Chem.*, 2015, **172**, 862-872.

22 X. Zhang, J. Wang, J.-M. Hu, Y.-W. Huang, X.-Y. Wu, C.-T. Zi, X.-J. Wang and J. Sheng, Synthesis and biological testing of novel glucosylated epigallocatechin gallate (EGCG) derivatives, *Molecules*, 2016, **21**, 620.

- 23 Y. Zhu, Y. Zhao, P. Wang, M. Ahmedna, C.-T. Ho and S. Sang, Tea flavanols block advanced glycation of lens crystallins induced by dehydroascorbic acid, *Chem. Res. Toxicol.*, 2015, **28**, 135-143.
- 24 NIST Chemistry WebBook–NIST Standard Reference Database Number 69, <http://webbook.nist.gov/chemistry>, (accessed March 2023).
- 25 The Good Scents Company Information System (TGSC), <http://www.thegoodscentscompany.com>, (accessed March 2022).
- 26 M. Crandles, A. G. Reynolds, R. Khairallah and A. Bowen, The effect of yeast strain on odor active compounds in Riesling and Vidal blanc icewines, *LWT-Food Sci. Technol.*, 2015, **64**, 243-258.
- 27 J. Jiang, W. Zhang, Y. Wu, X. Shi, X. Yang, Y. Song, Y. Qin, D. Ye and Y. Liu, Pilot-scale vinification of Cabernet Sauvignon using combined *Lactiplantibacillus plantarum* and *Saccharomyces cerevisiae* to achieve wine acidification, *Foods*, 2022, **11**, 2511.
- 28 H. Li, D. Qin, Z. Wu, B. Sun, X. Sun, M. Huang, J. Sun and F. Zheng, Characterization of key aroma compounds in Chinese Guojing sesame-flavor Baijiu by means of molecular sensory science, *Food Chem.*, 2019, **284**, 100-107.
- 29 Z. Liang, A. Pai, D. Liu, J. Luo, J. Wu, Z. Fang and P. Zhang, Optimizing extraction method of aroma compounds from grape pomace, *J. Food Sci.*, 2020, **85**, 4225-4240.
- 30 J. A. Pino and O. Queris, Analysis of volatile compounds of mango wine, *Food Chem.*, 2011, **125**, 1141-1146.
- 31 L. Vázquez-Araújo, L. Enguix, A. Verdú, E. García-García and A. A. Carbonell-Barrachina, Investigation of aromatic compounds in toasted almonds used for the manufacture of *turrón*, *Eur. Food Res. Technol.*, 2008, **227**, 243-254

32 X. Wang, W. Fan and Y. Xu, Comparison on aroma compounds in Chinese soy sauce and strong aroma type liquors by gas chromatography–olfactometry, chemical quantitative and odor activity values analysis, *Eur. Food Res. Technol.*, 2014, **239**, 813-825.

33 P.-P. Wang, Z. Li, T.-T. Qi, X.-J. Li and S.-Y. Pan, Development of a method for identification and accurate quantitation of aroma compounds in Chinese Daohuaxiang liquors based on SPME using a sol–gel fibre, *Food Chem.*, 2015, **169**, 230-240.
